# Supplementary material for: Transcriptome Analysis Reveals Roles of Anthocyanin- and Jasmonic Acid-Biosynthetic Pathways in Rapeseed in Response to High Light Stress
Source: MDPI journal article supplement (doi:10.3390/ijms222313027), 2021-12-01
Supplement: s1 [file s1]

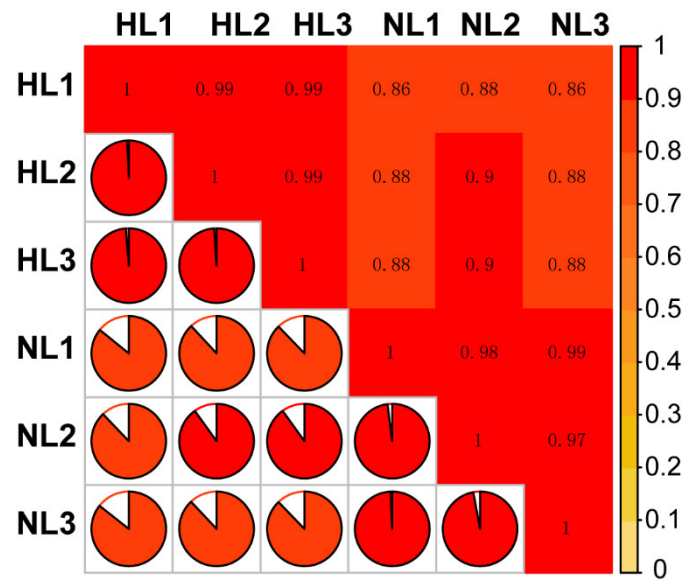

**Figure S1.** Pearson's correlation analysis of the samples. NL and HL indicate normal light and high light conditions, respectively. Numbers in red squares represents the correlation coefficient between samples.
