# Supplementary material for: Transcriptome Analysis Reveals Roles of Anthocyanin- and Jasmonic Acid-Biosynthetic Pathways in Rapeseed in Response to High Light Stress
Source: Int J Mol Sci. 2021 Dec 1;22(23):13027. doi: 10.3390/ijms222313027 (PMC8657659; doi:10.3390/ijms222313027)
Supplement: Supplementary file 1 [file ijms-22-13027-s001.zip › SI_20211119_1124.xlsx]

## Sheet: Table S1
Table S1: Levels of total flavonoids, anthocyanins, and three main individual anthocyanin compounds identified in the leaves of rapeseed seedlings grown under normal-light (NL) and high-light (HL) conditions.
Substance	NL (mg g-1 DW)	HL (mg g-1 DW)	NL (μg g-1 DW)	HL (μg g-1 DW)
total flavonoids	6.82±0.11	9.69±0.15**
total anthocyanins	6.51±0.004	9.35±0.25**
cyanidin			0.37±0.15	0.80±0.20*
cyanidin 3-O-glucoside			1.33±0.25	12.80±2.69**
delphinidin			0.87±0.31	4.67±0.95**
delphinidin 3-O-glucoside			1.63±0.42	6.83±1.01**
petunidin			0.10±0.01	0.53±0.06**
petunidin 3-O-glucoside			4.57±1.00	272.67±52.91**
* and ** indicate statistically significant differences between HL and NL at P < 0.05 and P < 0.01, respectively, as detected by a Student’s t-test.

## Sheet: Table S2
Table S2: Summary of the statistics of sequenced reads from the HL- and NL-grown libraries. HL and NL indicate high-light and normal-light samples, respectively, while the numbers following the light intensity indicate the replications. Q20 and Q30 refer to a base call accuracy of 97.23% and 92.88%, respectively.
Content	Total	HL1	HL2	HL3	NL1	NL2	NL3
Raw reads	270800074	42937020	40774268	42601798	40199332	42171552	62116104
Clean reads	268623326	42680240	40523816	42271652	39829748	41745818	61572052
Clean bases	40.29	6.4	6.08	6.34	5.97	6.26	9.24
GC percentage (%)	47.93	0.4789	0.4776	0.4792	0.4792	0.4819	0.4791
Clean reads Q20 (%)	97.23	0.9707	0.975	0.9725	0.9719	0.9718	0.972
Clean reads Q30 (%)	92.88	0.9258	0.9339	0.9286	0.9279	0.9274	0.9294
Total mapped reads (%)	0.8636	0.8554	0.8597	0.8686	0.8693	0.8687	0.86
Unique mapped	0.7002	0.6874	0.6962	0.7021	0.7089	0.706	0.7007
Multi mapped	0.1635	0.168	0.1635	0.1665	0.1604	0.1627	0.1597
‘+’ mapped	35.13	0.3433	0.3477	0.3505	0.3539	0.3524	0.3598
‘-’ mapped	35.05	0.3441	0.3485	0.3516	0.355	0.3536	0.3505
Exon	95.37	0.9552	0.9564	0.9549	0.9513	0.9527	0.9519
intron	1.3	0.0125	0.0125	0.0131	0.0136	0.0134	0.0133
Intergenic	3.32	0.0323	0.0312	0.032	0.0351	0.0339	0.0347
Total unigenes	198694

## Sheet: Table S3
Table S3: Information on the 4,393 up- and 2,997 down-regulated unigenes detected in leaves of rapeseed seedlings grown under high-light (HL) versus normal-light (NL) conditions.
Gene ID	HL1_FPKM	HL2_FPKM	HL3_FPKM	NL1_FPKM	NL2_FPKM	NL3_FPKM	Log2 Ratio(HL/NL)	P-value	Up- or down-regulation	KEGG	NR	Swissprot	Tremble	KOG	GO	Pfam
BnaA01g00140D	1.41	2.2	1.01	0.18	0.18	0.07	3.554	1.283e-06	up	K00083 cinnamyl-alcohol dehydrogenase [EC:1.1.1.195] | (RefSeq) cinnamyl alcohol dehydrogenase 7 isoform X1 (A)	cinnamyl alcohol dehydrogenase 7 isoform X2 [Brassica napus]	RecName: Full=Cinnamyl alcohol dehydrogenase 7; Short=AtCAD7; EC=1.1.1.195; AltName: Full=Cinnamyl alcohol dehydrogenase-like protein B;	SubName: Full=Uncharacterized protein {ECO:0000313|EnsemblPlants:Bra011799.1-P};	Alcohol dehydrogenase, class V	GO:0045551,cinnamyl-alcohol dehydrogenase activity; GO:0052747,sinapyl alcohol dehydrogenase activity; GO:0008270,zinc ion binding; GO:0009809,lignin biosynthetic process; GO:0009617,response to bacterium	Pyridine nucleotide-disulphide oxidoreductase
BnaA01g00270D	0.07	0.11	0.07	4.89	7	4.37	-5.956	2.21963e-20	down	K01762 1-aminocyclopropane-1-carboxylate synthase [EC:4.4.1.14] | (RefSeq) 1-aminocyclopropane-1-carboxylate synthase 8-like (A)	1-aminocyclopropane-1-carboxylate synthase 8-like [Brassica napus]	RecName: Full=1-aminocyclopropane-1-carboxylate synthase 8; Short=ACC synthase 8; EC=4.4.1.14; AltName: Full=S-adenosyl-L-methionine methylthioadenosine-lyase 8;	SubName: Full=Uncharacterized protein {ECO:0000313|EnsemblPlants:Bra011784.1-P};	1-aminocyclopropane-1-carboxylate synthase, and related proteins	GO:0016847,1-aminocyclopropane-1-carboxylate synthase activity; GO:0042802,identical protein binding; GO:0030170,pyridoxal phosphate binding; GO:0009693,ethylene biosynthetic process; GO:0009835,fruit ripening	Aminotransferase class I and II
BnaA01g00280D	39.64	30.16	30.11	12.9	16.26	11.02	1.411	2.51975e-11	up	K00511 squalene monooxygenase [EC:1.14.14.17] | (RefSeq) squalene epoxidase 3-like (A)	PREDICTED: squalene epoxidase 3 [Brassica rapa]	RecName: Full=Squalene epoxidase 3; Short=AtSQE3; EC=1.14.14.17 {ECO:0000269|PubMed:17426032};	SubName: Full=Uncharacterized protein {ECO:0000313|EnsemblPlants:Bra011783.1-P};	Squalene monooxygenase	GO:0005783,endoplasmic reticulum; GO:0016021,integral component of membrane; GO:0050660,flavin adenine dinucleotide binding; GO:0004506,squalene monooxygenase activity; GO:0009753,response to jasmonic acid; GO:0009611,response to wounding; GO:0016126,sterol biosynthetic process	HI0933-like protein
BnaA01g00340D	1.97	2.38	1.48	4.74	4.92	5.26	-1.256	1.37871e-06	down	K14682 amino-acid N-acetyltransferase [EC:2.3.1.1] | (RefSeq) probable amino-acid acetyltransferase NAGS2, chloroplastic (A)	PREDICTED: probable amino-acid acetyltransferase NAGS2, chloroplastic [Brassica rapa]	RecName: Full=Probable amino-acid acetyltransferase NAGS2, chloroplastic; EC=2.3.1.1; AltName: Full=N-acetylglutamate synthase 2; Flags: Precursor;	SubName: Full=Uncharacterized protein {ECO:0000313|EnsemblPlants:Bra011778.1-P};	Acetylglutamate kinase/acetylglutamate synthase	GO:0009507,chloroplast; GO:0004042,acetyl-CoA:L-glutamate N-acetyltransferase activity; GO:0103045,methione N-acyltransferase activity; GO:0006526,arginine biosynthetic process	FR47-like protein
BnaA01g00380D	16.23	14.94	15.33	5.65	7.28	5.17	1.458	1.53008e-14	up	K01455 formamidase [EC:3.5.1.49] | (RefSeq) uncharacterized protein LOC111214295 (A)	uncharacterized protein LOC106389913 [Brassica napus]	--	SubName: Full=Uncharacterized protein {ECO:0000313|EnsemblPlants:Bra011774.1-P};	--	--	Acetamidase/Formamidase family
BnaA01g00400D	0.85	1.78	2.29	17.81	11.83	13.38	-3.025	1.45205e-19	down	K21994 LOB domain-containing protein 18 | (RefSeq) LOB domain-containing protein 19 (A)	PREDICTED: LOB domain-containing protein 39 [Brassica rapa]	RecName: Full=LOB domain-containing protein 39; AltName: Full=ASYMMETRIC LEAVES 2-like protein 41; Short=AS2-like protein 41;	SubName: Full=Uncharacterized protein {ECO:0000313|EnsemblPlants:Bra011772.1-P};	--	--	Lateral organ boundaries (LOB) domain
BnaA01g00430D	1.71	3.14	3.51	1.24	1.68	1.44	1.032	0.0095125	up	K21777 G2/mitotic-specific cyclin-B, other | (RefSeq) cyclin-B1-1-like (A)	cyclin-B1-1 [Brassica napus]	RecName: Full=Cyclin-B1-1; AltName: Full=Cyc1-At; AltName: Full=G2/mitotic-specific cyclin-B1-1; Short=CycB1;1;	SubName: Full=Uncharacterized protein {ECO:0000313|EnsemblPlants:Bra011769.1-P};	Cyclin B and related kinase-activating proteins	GO:0005634,nucleus; GO:0007049,cell cycle; GO:0051301,cell division; GO:0001558,regulation of cell growth; GO:0010332,response to gamma radiation	Cyclin, C-terminal domain
BnaA01g00460D	4.01	3.93	3.53	1.72	2.48	1.51	1.105	0.000182158	up	K17573 meiosis arrest female protein 1 | (RefSeq) uncharacterized LOC109165541 (A)	uncharacterized protein LOC106440422 [Brassica napus]	--	SubName: Full=Uncharacterized protein {ECO:0000313|EnsemblPlants:Bra011766.1-P};	--	--	NYN domain
BnaA01g00590D	17.81	13.22	16.04	6.42	8.23	5.23	1.342	4.26123e-08	up	K13260 isoflavone/4'-methoxyisoflavone 2'-hydroxylase [EC:1.14.13.89 1.14.13.53] | (RefSeq) cytochrome P450 81D11-like (A)	PREDICTED: cytochrome P450 81D11-like [Brassica rapa]	RecName: Full=Cytochrome P450 81D11; EC=1.14.-.-;	SubName: Full=Uncharacterized protein {ECO:0000313|EnsemblPlants:Bra011757.1-P};	Cytochrome P450 CYP2 subfamily	GO:0016021,integral component of membrane; GO:0016020,membrane; GO:0020037,heme binding; GO:0005506,iron ion binding; GO:0016709,oxidoreductase activity, acting on paired donors, with incorporation or reduction of molecular oxygen, NAD(P)H as one donor, and incorporation of one atom of oxygen; GO:0002213,defense response to insect; GO:0098542,defense response to other organism; GO:0042343,indole …	Cytochrome P450
BnaA01g00790D	0.5	1.12	0.45	2.59	2.32	2.42	-1.732	0.000114891	down	K13448 calcium-binding protein CML | (RefSeq) calcium-binding protein CML19 (A)	PREDICTED: calcium-binding protein CML19 [Brassica rapa]	RecName: Full=Calcium-binding protein CML19 {ECO:0000303|Ref.7}; AltName: Full=Calmodulin-like protein 19 {ECO:0000303|Ref.7}; AltName: Full=Centrin 2 {ECO:0000303|PubMed:15155891}; Short=AtCEN2 {ECO:0000303|PubMed:15155891};	SubName: Full=Uncharacterized protein {ECO:0000313|EnsemblPlants:Bo1g005070.1};	Ca2+-binding protein (centrin/caltractin), EF-Hand superfamily protein	GO:0005737,cytoplasm; GO:0005634,nucleus; GO:0005509,calcium ion binding; GO:0006281,DNA repair	EF-hand domain
BnaA01g00900D	18.09	16.02	7.81	4.77	4.24	4.99	1.688	3.99647e-07	up	K20802 (R)-mandelonitrile lyase [EC:4.1.2.10] | (RefSeq) MES5; methyl esterase 5 (A)	methylesterase 9-like [Brassica napus]	RecName: Full=Methylesterase 9; Short=AtMES9; EC=3.1.1.-;	SubName: Full=Uncharacterized protein {ECO:0000313|EnsemblPlants:Bra011722.1-P};	--	GO:0016788,hydrolase activity, acting on ester bonds; GO:0080030,methyl indole-3-acetate esterase activity; GO:0080032,methyl jasmonate esterase activity; GO:0080031,methyl salicylate esterase activity; GO:0009817,defense response to fungus, incompatible interaction; GO:0009694,jasmonic acid metabolic process; GO:0009696,salicylic acid metabolic process; GO:0009627,systemic acquired resistance	Serine hydrolase
BnaA01g00960D	5.16	3.68	7	2.02	3.44	2.97	1.004	0.0138187	up	--	PREDICTED: uncharacterized protein LOC103864993 [Brassica rapa]	--	SubName: Full=Uncharacterized protein {ECO:0000313|EnsemblPlants:Bra011715.1-P};	--	--	Domain of unknown function (DUF4228)
BnaA01g01040D	22.26	22.89	22.09	50.22	58.53	40.74	-1.058	4.49763e-09	down	K14503 brassinosteroid resistant 1/2 | (RefSeq) BES1/BZR1 homolog protein 2 (A)	PREDICTED: BES1/BZR1 homolog protein 2 [Brassica rapa]	RecName: Full=BES1/BZR1 homolog protein 2;	SubName: Full=Uncharacterized protein {ECO:0000313|EnsemblPlants:Bra011706.1-P};	--	GO:0003677,DNA binding; GO:0003700,DNA-binding transcription factor activity; GO:0009742,brassinosteroid mediated signaling pathway; GO:0006351,transcription, DNA-templated	BES1/BZR1 plant transcription factor, N-terminal
BnaA01g01300D	0.78	1.37	1.93	18.66	26.77	25.17	-4.019	1.64703e-30	down	K10688 ubiquitin-conjugating enzyme E2 W [EC:2.3.2.25] | (RefSeq) probable ubiquitin-conjugating enzyme E2 17 (A)	PREDICTED: probable ubiquitin-conjugating enzyme E2 17 [Brassica rapa]	RecName: Full=Probable ubiquitin-conjugating enzyme E2 17; EC=2.3.2.23; AltName: Full=E2 ubiquitin-conjugating enzyme 17; AltName: Full=Ubiquitin carrier protein 17;	SubName: Full=Uncharacterized protein {ECO:0000313|EnsemblPlants:Bra011680.1-P};	Ubiquitin conjugating enzyme	GO:0005737,cytoplasm; GO:0005634,nucleus; GO:0005524,ATP binding; GO:0061630,ubiquitin protein ligase activity; GO:0031625,ubiquitin protein ligase binding; GO:0043161,proteasome-mediated ubiquitin-dependent protein catabolic process; GO:0000209,protein polyubiquitination; GO:0009739,response to gibberellin	RWD domain
BnaA01g01400D	31.72	38.23	25.95	5.34	6.12	6.81	2.49	1.36054e-37	up	K09755 ferulate-5-hydroxylase [EC:1.14.-.-] | (RefSeq) cytochrome P450 84A1 (A)	PREDICTED: cytochrome P450 84A1 isoform X1 [Brassica rapa]	RecName: Full=Cytochrome P450 84A1; EC=1.14.-.-; AltName: Full=Ferulate-5-hydroxylase; Short=F5H;	SubName: Full=Cytochrome p450-dependent monooxygenase {ECO:0000313|EMBL:AAG14961.1};	Cytochrome P450 CYP2 subfamily	GO:0005783,endoplasmic reticulum; GO:0016021,integral component of membrane; GO:0016020,membrane; GO:0020037,heme binding; GO:0005506,iron ion binding; GO:0004497,monooxygenase activity; GO:0016709,oxidoreductase activity, acting on paired donors, with incorporation or reduction of molecular oxygen, NAD(P)H as one donor, and incorporation of one atom of oxygen; GO:0009809,lignin biosynthetic proc…	Cytochrome P450
BnaA01g01570D	22.89	25.63	34.48	12.18	11.23	14.48	1.23	2.11443e-10	up	K04733 interleukin-1 receptor-associated kinase 4 [EC:2.7.11.1] | (RefSeq) LEAF RUST 10 DISEASE-RESISTANCE LOCUS RECEPTOR-LIKE PROTEIN KINASE-like 2.4 (A)	thaumatin-like protein 1b isoform X1 [Brassica napus]	RecName: Full=Thaumatin-like protein 1 {ECO:0000303|PubMed:15988566}; Short=AtTLP1 {ECO:0000303|PubMed:15988566}; Flags: Precursor;	SubName: Full=Uncharacterized protein {ECO:0000313|EnsemblPlants:Bra011654.1-P};	--	GO:0009682,induced systemic resistance; GO:0009617,response to bacterium; GO:0009723,response to ethylene	Beta-1,3-glucanase
BnaA01g01620D	8.85	4.04	23.38	3.6	4.48	5.79	1.481	0.00337609	up	--	PREDICTED: vicilin-like seed storage protein At2g18540 [Brassica rapa]	--	SubName: Full=Uncharacterized protein {ECO:0000313|EnsemblPlants:Bra011650.1-P};	--	--	--
BnaA01g01700D	21.74	19.6	16.54	66.74	70.32	45.77	-1.564	1.76042e-14	down	K01681 aconitate hydratase [EC:4.2.1.3] | (RefSeq) aconitate hydratase 1 (A)	aconitate hydratase 1 [Brassica napus]	RecName: Full=Aconitate hydratase 1 {ECO:0000303|PubMed:25061985}; Short=Aconitase 1 {ECO:0000303|PubMed:25061985}; EC=4.2.1.3 {ECO:0000250|UniProtKB:P19414}; AltName: Full=Citrate hydro-lyase 1 {ECO:0000303|PubMed:25061985};	RecName: Full=Aconitate hydratase {ECO:0000256|RuleBase:RU361275}; Short=Aconitase {ECO:0000256|RuleBase:RU361275}; EC=4.2.1.3 {ECO:0000256|RuleBase:RU361275};	RNA-binding translational regulator IRP (aconitase superfamily)	GO:0048046,apoplast; GO:0005829,cytosol; GO:0005739,mitochondrion; GO:0005886,plasma membrane; GO:0009506,plasmodesma; GO:0005773,vacuole; GO:0051539,4 iron, 4 sulfur cluster binding; GO:0003994,aconitate hydratase activity; GO:0005507,copper ion binding; GO:0048027,mRNA 5'-UTR binding; GO:0006101,citrate metabolic process; GO:0006102,isocitrate metabolic process; GO:1990641,response to iron ion …	Aconitase C-terminal domain
BnaA01g01780D	3.04	1.68	5.69	40.88	32.29	51.39	-3.475	6.03611e-23	down	K01013 thiosulfate:glutathione sulfurtransferase [EC:2.8.1.-] | (RefSeq) LOW QUALITY PROTEIN: thiosulfate sulfurtransferase 16, chloroplastic-like (A)	PREDICTED: senescence-associated protein DIN1 isoform X1 [Brassica rapa]	RecName: Full=Senescence-associated protein DIN1;	SubName: Full=Uncharacterized protein {ECO:0000313|EnsemblPlants:Bra011636.1-P};	Rhodanese-related sulfurtransferase	--	Rhodanese-like domain
BnaA01g01990D	8.9	8.2	8.56	2.96	2.97	2.25	1.754	1.86851e-18	up	--	PREDICTED: chloride channel protein CLC-e isoform X1 [Brassica rapa]	RecName: Full=Chloride channel protein CLC-e; Short=AtCLC-e; AltName: Full=CBS domain-containing protein CBSCLC3;	RecName: Full=Chloride channel protein {ECO:0000256|RuleBase:RU361221};	Cl- channel CLC-3 and related proteins (CLC superfamily)	GO:0034707,chloride channel complex; GO:0005247,voltage-gated chloride channel activity; GO:0034765,regulation of ion transmembrane transport	CBS domain
BnaA01g02050D	18.36	15.54	14.41	10.86	8.58	5.6	1.051	6.54012e-05	up	K09680 type II pantothenate kinase [EC:2.7.1.33] | (RefSeq) uncharacterized protein At2g17340-like (A)	PREDICTED: uncharacterized protein At2g17340 [Brassica rapa]	RecName: Full=Uncharacterized protein At2g17340;	SubName: Full=Uncharacterized protein {ECO:0000313|EnsemblPlants:Bra011609.1-P};	Uncharacterized conserved protein	--	Protein of unknown function DUF89
BnaA01g02290D	2.05	1.87	2.92	4.97	7.67	4.58	-1.24	6.67137e-05	down	K14810 ATP-dependent RNA helicase DDX56/DBP9 [EC:3.6.4.13] | (RefSeq) DEAD-box ATP-dependent RNA helicase 16-like (A)	DEAD-box ATP-dependent RNA helicase 16-like [Brassica napus]	RecName: Full=DEAD-box ATP-dependent RNA helicase 16; EC=3.6.4.13;	SubName: Full=Uncharacterized protein {ECO:0000313|EnsemblPlants:Bra011571.1-P};	RNA helicase	GO:0005737,cytoplasm; GO:0005730,nucleolus; GO:0005524,ATP binding; GO:0004004,ATP-dependent RNA helicase activity; GO:0003723,RNA binding; GO:0010501,RNA secondary structure unwinding; GO:0006364,rRNA processing	Type III restriction enzyme, res subunit
BnaA01g02410D	1.24	1.57	0.86	6.91	4.53	10.75	-2.495	1.53764e-07	down	K14488 SAUR family protein | (RefSeq) auxin-induced protein 15A-like (A)	PREDICTED: auxin-induced protein 15A [Brassica rapa]	RecName: Full=Auxin-induced protein 15A;	SubName: Full=Uncharacterized protein {ECO:0000313|EnsemblPlants:Bo1g006950.1};	--	GO:0009734,auxin-activated signaling pathway	Auxin responsive protein
BnaA01g02420D	1.16	2.12	2.51	6.54	7.47	9.39	-1.918	1.36506e-06	down	K14488 SAUR family protein | (RefSeq) auxin-responsive protein SAUR50 (A)	auxin-responsive protein SAUR50 [Brassica napus]	RecName: Full=Auxin-responsive protein SAUR50 {ECO:0000303|PubMed:12036261}; AltName: Full=Protein SMALL AUXIN UP RNA 50 {ECO:0000303|PubMed:12036261};	SubName: Full=Uncharacterized protein {ECO:0000313|EnsemblPlants:Bra011560.1-P};	--	GO:0009734,auxin-activated signaling pathway; GO:0040008,regulation of growth	Auxin responsive protein
BnaA01g02510D	2.08	2.09	2.09	0.47	0.26	0.03	3.192	2.29943e-06	up	K00801 farnesyl-diphosphate farnesyltransferase [EC:2.5.1.21] | (RefSeq) inactive squalene synthase 2 (A)	inactive squalene synthase 2 [Brassica napus]	RecName: Full=Inactive squalene synthase 2 {ECO:0000303|PubMed:18236008};	SubName: Full=Uncharacterized protein {ECO:0000313|EnsemblPlants:Bra011549.1-P};	Squalene synthetase	GO:0005789,endoplasmic reticulum membrane; GO:0016021,integral component of membrane; GO:0004310,farnesyl-diphosphate farnesyltransferase activity; GO:0006696,ergosterol biosynthetic process; GO:0045338,farnesyl diphosphate metabolic process; GO:0016126,sterol biosynthetic process	Squalene/phytoene synthase
BnaA01g02530D	26.63	20.99	21.08	10.49	7.87	7.57	1.512	7.87771e-13	up	--	uncharacterized protein LOC106353736 [Brassica napus]	--	SubName: Full=Uncharacterized protein {ECO:0000313|EnsemblPlants:Bra011547.1-P};	--	--	--
BnaA01g02620D	8.23	8.2	9.17	24.85	23.81	20.41	-1.333	4.28596e-15	down	K11253 histone H3 | (RefSeq) hypothetical protein (A)	PREDICTED: transcription factor bHLH63-like [Brassica rapa]	RecName: Full=Transcription factor bHLH63; AltName: Full=Basic helix-loop-helix protein 63; Short=AtbHLH63; Short=bHLH 63; AltName: Full=Protein CRYPTOCHROME INTERACTING BASIC-HELIX-LOOP-HELIX 1; AltName: Full=Transcription factor EN 84; AltName: Full=bHLH transcription factor bHLH063;	SubName: Full=Uncharacterized protein {ECO:0000313|EnsemblPlants:Bra011540.1-P};	--	GO:0005634,nucleus; GO:0003677,DNA binding; GO:0003700,DNA-binding transcription factor activity; GO:0046983,protein dimerization activity; GO:0009908,flower development; GO:0009911,positive regulation of flower development; GO:0009637,response to blue light; GO:0006351,transcription, DNA-templated	Helix-loop-helix DNA-binding domain
BnaA01g02860D	10.69	16.07	13.91	31.21	35.06	27.99	-1.119	1.45454e-09	down	K15923 alpha-L-fucosidase 2 [EC:3.2.1.51] | (RefSeq) alpha-L-fucosidase 2 (A)	altered xyloglucan 8 [Brassica napus]	RecName: Full=Alpha-L-fucosidase 2; EC=3.2.1.51; AltName: Full=Alpha-1,2-fucosidase 2; AltName: Full=Alpha-L-fucosidase 95A; Short=AtFuc95A; AltName: Full=Alpha-L-fucoside fucohydrolase 2; AltName: Full=Protein ALTERED XYLOGLUCAN 8; Flags: Precursor;	SubName: Full=Altered xyloglucan 8 {ECO:0000313|EMBL:AID60138.1};	--	GO:0048046,apoplast; GO:0047513,1,2-alpha-L-fucosidase activity; GO:0008152,metabolic process	Glycosyl hydrolase family 65, N-terminal domain
BnaA01g02880D	25.43	25.77	21.26	9.68	7.82	8.09	1.606	5.86869e-23	up	K00128 aldehyde dehydrogenase (NAD+) [EC:1.2.1.3] | (RefSeq) aldehyde dehydrogenase family 3 member I1, chloroplastic (A)	aldehyde dehydrogenase family 3 member I1, chloroplastic [Brassica napus]	RecName: Full=Aldehyde dehydrogenase family 3 member I1, chloroplastic; Short=AtALDH3; Short=Ath-ALDH3; EC=1.2.1.3; Flags: Precursor;	RecName: Full=Aldehyde dehydrogenase {ECO:0000256|PIRNR:PIRNR036492};	Aldehyde dehydrogenase	GO:0009507,chloroplast; GO:0009941,chloroplast envelope; GO:0009536,plastid; GO:0004028,3-chloroallyl aldehyde dehydrogenase activity; GO:0004029,aldehyde dehydrogenase (NAD) activity; GO:0033721,aldehyde dehydrogenase (NADP+) activity; GO:0004030,aldehyde dehydrogenase [NAD(P)+] activity; GO:0006081,cellular aldehyde metabolic process; GO:0009737,response to abscisic acid; GO:0009414,response to…	Aldehyde dehydrogenase family
BnaA01g03110D	1.86	1.84	1.71	0.75	0.44	0.97	1.416	0.00355111	up	K14498 serine/threonine-protein kinase SRK2 [EC:2.7.11.1] | (RefSeq) serine/threonine-protein kinase SRK2E (A)	calcium-independent ABA-activated protein kinase [Brassica napus]	RecName: Full=Serine/threonine-protein kinase SRK2E; EC=2.7.11.1; AltName: Full=Protein OPEN STOMATA 1; AltName: Full=SNF1-related kinase 2.6; Short=SnRK2.6; AltName: Full=Serine/threonine-protein kinase OST1;	SubName: Full=Sucrose non-fermenting 1-related protein kinase 2 {ECO:0000313|EMBL:ALO51445.1};	Serine/threonine protein kinase	GO:0005737,cytoplasm; GO:0005829,cytosol; GO:0005634,nucleus; GO:0005524,ATP binding; GO:0009931,calcium-dependent protein serine/threonine kinase activity; GO:0042802,identical protein binding; GO:0016301,kinase activity; GO:0004672,protein kinase activity; GO:0019903,protein phosphatase binding; GO:0004674,protein serine/threonine kinase activity; GO:0009738,abscisic acid-activated signaling pa…	Protein tyrosine kinase
BnaA01g03200D	73.61	80.76	73.11	19.1	40.23	23.59	1.541	3.15182e-09	up	K13356 alcohol-forming fatty acyl-CoA reductase [EC:1.2.1.84] | (RefSeq) fatty acyl-CoA reductase 3 (A)	alcohol-forming fatty acyl-CoA reductase [Brassica napus]	RecName: Full=Fatty acyl-CoA reductase 3 {ECO:0000305}; EC=1.2.1.84 {ECO:0000269|PubMed:16980563, ECO:0000269|PubMed:19062129}; AltName: Full=Protein ECERIFERUM 4;	RecName: Full=Fatty acyl-CoA reductase {ECO:0000256|RuleBase:RU363097}; EC=1.2.1.84 {ECO:0000256|RuleBase:RU363097};	Acyl-CoA reductase	GO:0005783,endoplasmic reticulum; GO:0102965,alcohol-forming fatty acyl-CoA reductase activity; GO:0080019,fatty-acyl-CoA reductase (alcohol-forming) activity; GO:0006629,lipid metabolic process; GO:0035336,long-chain fatty-acyl-CoA metabolic process; GO:0010345,suberin biosynthetic process; GO:0010025,wax biosynthetic process	3-beta hydroxysteroid dehydrogenase/isomerase family
BnaA01g03340D	4.89	4.04	3.12	2.6	2.13	1.23	1.126	0.0107313	up	--	PREDICTED: uncharacterized protein LOC103845772 [Brassica rapa]	--	SubName: Full=Uncharacterized protein {ECO:0000313|EnsemblPlants:Bra011456.1-P};	Protease, Ulp1 family	--	COPI associated protein
BnaA01g03460D	17.98	12.07	17.21	6.97	10.42	5.61	1.132	6.77841e-05	up	K11407 histone deacetylase 6 [EC:3.5.1.98] | (RefSeq) histone deacetylase 5 (A)	PREDICTED: histone deacetylase 14 [Brassica rapa]	RecName: Full=Histone deacetylase 14; EC=3.5.1.98;	RecName: Full=Histone deacetylase {ECO:0000256|SAAS:SAAS00894283}; EC=3.5.1.98 {ECO:0000256|SAAS:SAAS00894283};	Histone deacetylase complex, catalytic component HDA1	GO:0009507,chloroplast; GO:0005829,cytosol; GO:0005634,nucleus; GO:0043014,alpha-tubulin binding; GO:0048487,beta-tubulin binding; GO:0032041,NAD-dependent histone deacetylase activity (H3-K14 specific); GO:0051721,protein phosphatase 2A binding; GO:0043621,protein self-association; GO:0042903,tubulin deacetylase activity; GO:0006355,regulation of transcription, DNA-templated; GO:0006351,transcri…	Histone deacetylase domain
BnaA01g03580D	5.56	6.6	5.06	2.02	2.52	2.71	1.342	1.34851e-09	up	K19613 leucine-rich repeat protein SHOC2 | (RefSeq) probable disease resistance protein At5g66910 (A)	PREDICTED: probable disease resistance protein At4g33300 [Brassica rapa]	RecName: Full=Probable disease resistance protein At4g33300;	SubName: Full=Uncharacterized protein {ECO:0000313|EnsemblPlants:Bra011432.1-P};	--	GO:0048046,apoplast; GO:0043531,ADP binding; GO:0005524,ATP binding; GO:0042742,defense response to bacterium	AAA domain
BnaA01g03860D	1168.79	1025.06	1022.44	402.6	475.05	353.23	1.481	9.46878e-21	up	K00281 glycine dehydrogenase [EC:1.4.4.2] | (RefSeq) glycine dehydrogenase (decarboxylating) 1, mitochondrial (A)	glycine dehydrogenase (decarboxylating) 1, mitochondrial [Brassica napus]	RecName: Full=Glycine dehydrogenase (decarboxylating) 1, mitochondrial; EC=1.4.4.2; AltName: Full=Glycine cleavage system P protein 1; AltName: Full=Glycine decarboxylase 1; AltName: Full=Glycine decarboxylase P-protein 1; Short=AtGLDP1; AltName: Full=Glycine dehydrogenase (aminomethyl-transferring) 1; Flags: Precursor;	RecName: Full=Glycine cleavage system P protein {ECO:0000256|RuleBase:RU364056}; EC=1.4.4.2 {ECO:0000256|RuleBase:RU364056};	Glycine dehydrogenase (decarboxylating)	GO:0048046,apoplast; GO:0009507,chloroplast; GO:0009941,chloroplast envelope; GO:0009570,chloroplast stroma; GO:0009534,chloroplast thylakoid; GO:0005739,mitochondrion; GO:0004375,glycine dehydrogenase (decarboxylating) activity; GO:0006546,glycine catabolic process; GO:0046686,response to cadmium ion	Beta-eliminating lyase
BnaA01g04030D	4.64	5.62	6.93	13.51	14.4	12.36	-1.132	5.19745e-09	down	K14304 nuclear pore complex protein Nup85 | (RefSeq) nuclear pore complex protein NUP85-like (A)	PREDICTED: nuclear pore complex protein NUP85 [Brassica rapa]	RecName: Full=Nuclear pore complex protein NUP85; AltName: Full=Nuclear pore complex protein NUP75 {ECO:0000303|PubMed:21189294}; AltName: Full=Nucleoporin 75; AltName: Full=Nucleoporin 85;	SubName: Full=Uncharacterized protein {ECO:0000313|EnsemblPlants:Bra011395.1-P};	Nuclear pore complex component (sc Nup85)	GO:0005635,nuclear envelope; GO:0031080,nuclear pore outer ring; GO:0017056,structural constituent of nuclear pore; GO:0006406,mRNA export from nucleus; GO:0045893,positive regulation of transcription, DNA-templated; GO:0006606,protein import into nucleus; GO:0009737,response to abscisic acid	Nup85 Nucleoporin
BnaA01g04110D	2.21	3.13	4.19	10.07	6.88	10.02	-1.397	3.76892e-07	down	K00850 6-phosphofructokinase 1 [EC:2.7.1.11] | (RefSeq) ATP-dependent 6-phosphofructokinase 6 (A)	PREDICTED: ATP-dependent 6-phosphofructokinase 6 [Brassica rapa]	RecName: Full=ATP-dependent 6-phosphofructokinase 6 {ECO:0000255|HAMAP-Rule:MF_03186}; Short=ATP-PFK 6 {ECO:0000255|HAMAP-Rule:MF_03186}; Short=Phosphofructokinase 6 {ECO:0000255|HAMAP-Rule:MF_03186}; EC=2.7.1.11 {ECO:0000255|HAMAP-Rule:MF_03186}; AltName: Full=Phosphohexokinase 6 {ECO:0000255|HAMAP-Rule:MF_03186};	RecName: Full=ATP-dependent 6-phosphofructokinase {ECO:0000256|HAMAP-Rule:MF_03186}; Short=ATP-PFK {ECO:0000256|HAMAP-Rule:MF_03186}; Short=Phosphofructokinase {ECO:0000256|HAMAP-Rule:MF_03186}; EC=2.7.1.11 {ECO:0000256|HAMAP-Rule:MF_03186}; AltName: Full=Phosphohexokinase {ECO:0000256|HAMAP-Rule:MF_03186};	Pyrophosphate-dependent phosphofructo-1-kinase	GO:0005829,cytosol; GO:0003872,6-phosphofructokinase activity; GO:0005524,ATP binding; GO:0046872,metal ion binding; GO:0006002,fructose 6-phosphate metabolic process; GO:0006096,glycolytic process	Diacylglycerol kinase catalytic domain
BnaA01g04150D	2.54	2.45	5.18	1.16	0.58	0.51	2.29	3.08017e-05	up	K09286 EREBP-like factor | (RefSeq) ethylene-responsive transcription factor ERF043 (A)	PREDICTED: ethylene-responsive transcription factor ERF043 [Brassica rapa]	RecName: Full=Ethylene-responsive transcription factor ERF043;	SubName: Full=Uncharacterized protein {ECO:0000313|EnsemblPlants:Bra011383.1-P};	--	GO:0005634,nucleus; GO:0003700,DNA-binding transcription factor activity; GO:0043565,sequence-specific DNA binding; GO:0044212,transcription regulatory region DNA binding; GO:0009873,ethylene-activated signaling pathway; GO:0006351,transcription, DNA-templated	AP2 domain
BnaA01g04550D	3.22	3	4.01	17.09	10.55	11.64	-1.836	3.58982e-13	down	K03097 casein kinase II subunit alpha [EC:2.7.11.1] | (RefSeq) casein kinase II subunit alpha-like isoform X2 (A)	PREDICTED: uncharacterized protein LOC103850912 [Brassica rapa]	--	SubName: Full=Uncharacterized protein {ECO:0000313|EnsemblPlants:Bra011349.1-P};	--	--	Protein of unknown function (DUF642)
BnaA01g04580D	0.22	0.53	0.41	1.46	0.92	1.12	-1.482	0.00160721	down	K22733 magnesium transporter | (RefSeq) pentatricopeptide repeat-containing protein At3g12770 (A)	pentatricopeptide repeat-containing protein At4g32430, mitochondrial-like isoform X1 [Brassica napus]	RecName: Full=Pentatricopeptide repeat-containing protein At4g32430, mitochondrial; Flags: Precursor;	SubName: Full=Uncharacterized protein {ECO:0000313|EnsemblPlants:Bra011347.1-P};	FOG: PPR repeat	GO:0005739,mitochondrion; GO:0004519,endonuclease activity; GO:0003723,RNA binding; GO:1905639,positive regulation of mitochondrial mRNA catabolic process; GO:0009451,RNA modification	Pentacotripeptide-repeat region of PRORP
BnaA01g04710D	1.92	1.06	1.22	23.31	29.78	25.53	-4.132	2.61246e-47	down	K14484 auxin-responsive protein IAA | (RefSeq) auxin-responsive protein IAA29 (A)	PREDICTED: auxin-responsive protein IAA29 isoform X1 [Brassica rapa]	RecName: Full=Auxin-responsive protein IAA29; AltName: Full=Indoleacetic acid-induced protein 29;	RecName: Full=Auxin-responsive protein {ECO:0000256|RuleBase:RU004549};	--	GO:0005634,nucleus; GO:0003700,DNA-binding transcription factor activity; GO:0009734,auxin-activated signaling pathway; GO:0009733,response to auxin; GO:0010218,response to far red light; GO:0010114,response to red light; GO:0006351,transcription, DNA-templated	AUX/IAA family
BnaA01g04750D	12.22	11	8.18	1.9	1.76	1.25	2.782	1.83326e-28	up	K21777 G2/mitotic-specific cyclin-B, other | (RefSeq) uncharacterized protein LOC106380497 (A)	PREDICTED: coiled-coil domain-containing protein 18 [Brassica rapa]	--	SubName: Full=Uncharacterized protein {ECO:0000313|EnsemblPlants:Bra011328.1-P};	--	--	--
BnaA01g05020D	7.31	13.33	17.18	4.2	5.5	9.7	1.057	0.00710934	up	K03006 DNA-directed RNA polymerase II subunit RPB1 [EC:2.7.7.6] | (RefSeq) early nodulin-like protein 2 isoform X1 (A)	PREDICTED: early nodulin-like protein 1 [Brassica rapa]	RecName: Full=Early nodulin-like protein 1; AltName: Full=Phytocyanin-like protein; Flags: Precursor;	SubName: Full=Uncharacterized protein {ECO:0000313|EnsemblPlants:Bra011303.1-P};	--	GO:0031225,anchored component of membrane; GO:0046658,anchored component of plasma membrane; GO:0005886,plasma membrane; GO:0009506,plasmodesma; GO:0009055,electron transfer activity	Plastocyanin-like domain
BnaA01g05170D	0.89	1.11	1.78	2.42	5.38	2.92	-1.415	0.00486699	down	--	BnaA01g05170D [Brassica napus]	RecName: Full=Proline-rich protein 4; Short=AtPRP4; Flags: Precursor;	SubName: Full=BnaA01g05170D protein {ECO:0000313|EMBL:CDY41945.1};	--	GO:0005618,cell wall; GO:0005576,extracellular region	--
BnaA01g05190D	7.26	11.8	2.74	16.02	17.55	21.48	-1.234	0.00300294	down	K14488 SAUR family protein | (RefSeq) auxin-responsive protein SAUR50 (A)	PREDICTED: auxin-induced protein 15A-like [Brassica rapa]	RecName: Full=Auxin-responsive protein SAUR50 {ECO:0000303|PubMed:12036261}; AltName: Full=Protein SMALL AUXIN UP RNA 50 {ECO:0000303|PubMed:12036261};	SubName: Full=Uncharacterized protein {ECO:0000313|EnsemblPlants:Bra011889.1-P};	--	GO:0009734,auxin-activated signaling pathway; GO:0040008,regulation of growth	Auxin responsive protein
BnaA01g05220D	6.37	7.12	8.91	16.86	21.67	18.95	-1.265	4.33918e-11	down	K05544 tRNA-dihydrouridine synthase 3 [EC:1.3.1.89] | (RefSeq) tRNA-dihydrouridine(47) synthase [NAD(P)(+)]-like (A)	BnaA01g05220D [Brassica napus]	RecName: Full=tRNA-dihydrouridine(47) synthase [NAD(P)(+)]-like; EC=1.3.1.-; AltName: Full=Zinc finger CCCH domain-containing protein 50; Short=AtC3H50; AltName: Full=tRNA-dihydrouridine synthase 3-like;	RecName: Full=tRNA-dihydrouridine(47) synthase [NAD(P)(+)] {ECO:0000256|RuleBase:RU291113}; EC=1.3.1.- {ECO:0000256|RuleBase:RU291113}; AltName: Full=tRNA-dihydrouridine synthase 3 {ECO:0000256|RuleBase:RU291113};	Uncharacterized conserved protein	GO:0005773,vacuole; GO:0050660,flavin adenine dinucleotide binding; GO:0046872,metal ion binding; GO:0017150,tRNA dihydrouridine synthase activity	Zinc finger C-x8-C-x5-C-x3-H type (and similar)
BnaA01g05400D	0	1.35	1.77	12.4	16.12	20.36	-3.869	5.92093e-11	down	K15397 3-ketoacyl-CoA synthase [EC:2.3.1.199] | (RefSeq) 3-ketoacyl-CoA synthase 17-like (A)	BnaA01g05400D [Brassica napus]	RecName: Full=Protein RADIALIS-like 1; Short=AtRL1; Short=Protein RAD-like 1; AltName: Full=Protein RADIALIS-LIKE SANT/MYB 2; Short=Protein RSM2;	SubName: Full=BnaA01g05400D protein {ECO:0000313|EMBL:CDY41968.1};	Zuotin and related molecular chaperones (DnaJ superfamily), contains DNA-binding domains	GO:0005634,nucleus; GO:0003677,DNA binding; GO:0003700,DNA-binding transcription factor activity; GO:0006351,transcription, DNA-templated	Myb-like DNA-binding domain
BnaA01g05410D	58.81	76.2	84.32	193.87	186.36	203.23	-1.313	1.28038e-18	down	K13195 cold-inducible RNA-binding protein | (RefSeq) glycine-rich RNA-binding protein (A)	PREDICTED: glycine-rich RNA-binding protein 10 isoform X1 [Brassica oleracea var. oleracea]	RecName: Full=Glycine-rich RNA-binding protein 10;	SubName: Full=Uncharacterized protein {ECO:0000313|EnsemblPlants:Bo1g002460.1};	FOG: RRM domain	GO:0003723,RNA binding	Glycine rich protein family
BnaA01g05450D	6.21	4.55	5.94	1.61	2.69	1.56	1.604	6.81411e-09	up	K10999 cellulose synthase A [EC:2.4.1.12] | (RefSeq) cellulose synthase A catalytic subunit 2 [UDP-forming] (A)	BnaA01g05450D [Brassica napus]	RecName: Full=Cellulose synthase A catalytic subunit 2 [UDP-forming]; Short=AtCesA2; Short=Ath-A; EC=2.4.1.12;	RecName: Full=Cellulose synthase {ECO:0000256|RuleBase:RU361116}; EC=2.4.1.12 {ECO:0000256|RuleBase:RU361116};	--	GO:0005794,Golgi apparatus; GO:0016021,integral component of membrane; GO:0005886,plasma membrane; GO:0016760,cellulose synthase (UDP-forming) activity; GO:0046872,metal ion binding; GO:0071555,cell wall organization; GO:0030244,cellulose biosynthetic process	Glycosyl transferase family 2
BnaA01g05860D	0.71	0.17	0.26	7.27	3.91	6.28	-3.834	5.54068e-10	down	K14416 elongation factor 1 alpha-like protein | (RefSeq) hypothetical protein (A)	PREDICTED: flowering-promoting factor 1-like protein 1 [Brassica rapa]	RecName: Full=Flowering-promoting factor 1-like protein 1; AltName: Full=FPF1-like protein 1;	SubName: Full=Uncharacterized protein {ECO:0000313|EnsemblPlants:Bra011265.1-P};	--	--	--
BnaA01g05890D	2.69	3.01	4.7	7.3	7.96	7.43	-1.028	0.000665824	down	no KO assigned | (RefSeq) UDP-glycosyltransferase 85A8-like isoform X1 (A)	selenoprotein H [Brassica napus]	--	SubName: Full=BnaA01g05890D protein {ECO:0000313|EMBL:CDY28260.1};	--	--	Rdx family
BnaA01g05960D	4.76	5.52	5.11	2.45	2.84	1.66	1.251	7.32243e-05	up	K22596 gamma-glutamylcyclotransferase, plant [EC:4.3.2.9] | (RefSeq) gamma-glutamylcyclotransferase 2-2 (A)	gamma-glutamylcyclotransferase 2-2 [Brassica napus]	RecName: Full=Gamma-glutamylcyclotransferase 2-2 {ECO:0000305}; Short=AtGGCT2;2 {ECO:0000303|PubMed:25716890}; EC=4.3.2.9 {ECO:0000269|PubMed:25716890}; AltName: Full=Gamma-glutamyl cyclotransferase 2;2 {ECO:0000303|PubMed:25716890};	RecName: Full=Gamma-glutamylcyclotransferase {ECO:0000256|RuleBase:RU363081}; EC=4.3.2.9 {ECO:0000256|RuleBase:RU363081};	Predicted cation transporter	GO:0005737,cytoplasm; GO:0003839,gamma-glutamylcyclotransferase activity; GO:0016829,lyase activity; GO:0006751,glutathione catabolic process	ChaC-like protein
BnaA01g06120D	0.24	0.44	0.58	2.41	1.3	1.65	-1.977	5.31944e-05	down	K21989 calcium permeable stress-gated cation channel | (RefSeq) CSC1-like protein RXW8 (A)	BnaA01g06120D [Brassica napus]	RecName: Full=Calmodulin-binding protein 60 F {ECO:0000303|PubMed:11782485};	SubName: Full=BnaA01g06120D protein {ECO:0000313|EMBL:CDY28237.1};	--	GO:0005634,nucleus; GO:0005516,calmodulin binding; GO:0003677,DNA binding; GO:0006355,regulation of transcription, DNA-templated; GO:0006950,response to stress; GO:0006351,transcription, DNA-templated	Calmodulin binding protein-like
BnaA01g06180D	52.52	31.86	38.34	15.32	14.06	12.56	1.652	3.94158e-15	up	K07198 5'-AMP-activated protein kinase, catalytic alpha subunit [EC:2.7.11.11] | (RefSeq) CBL-interacting serine/threonine-protein kinase 6 (A)	BnaA01g06180D [Brassica napus]	RecName: Full=CBL-interacting serine/threonine-protein kinase 6; EC=2.7.11.1; AltName: Full=SNF1-related kinase 3.14; AltName: Full=SOS2-like protein kinase PKS4; AltName: Full=SOS3-interacting protein 3;	RecName: Full=Non-specific serine/threonine protein kinase {ECO:0000256|SAAS:SAAS00351747}; EC=2.7.11.1 {ECO:0000256|SAAS:SAAS00351747};	Serine/threonine protein kinase	GO:0005783,endoplasmic reticulum; GO:0005622,intracellular; GO:0005524,ATP binding; GO:0004674,protein serine/threonine kinase activity; GO:0010540,basipetal auxin transport; GO:0042538,hyperosmotic salinity response; GO:0035556,intracellular signal transduction; GO:0007275,multicellular organism development; GO:0018105,peptidyl-serine phosphorylation; GO:0018107,peptidyl-threonine phosphorylatio…	Haspin like kinase domain
BnaA01g06520D	9.19	9.47	13.09	5.49	3.94	4.89	1.251	9.13502e-07	up	--	PREDICTED: uncharacterized protein LOC103852566 [Brassica rapa]	--	SubName: Full=Uncharacterized protein {ECO:0000313|EnsemblPlants:Bra011204.1-P};	--	--	Apg6 coiled-coil region
BnaA01g06540D	71.49	68.25	87.07	16.16	13.07	18.12	2.361	1.85918e-47	up	K22314 glucosinolate gamma-glutamyl hydrolase [EC:3.4.19.16] | (RefSeq) gamma-glutamyl peptidase 1-like (A)	BnaA01g06540D [Brassica napus]	RecName: Full=Gamma-glutamyl peptidase 1 {ECO:0000305}; EC=3.4.19.- {ECO:0000305};	SubName: Full=BnaA01g06540D protein {ECO:0000313|EMBL:CDY28195.1};	Predicted glutamine synthetase	GO:0005829,cytosol; GO:0034722,gamma-glutamyl-peptidase activity; GO:0008233,peptidase activity; GO:0010120,camalexin biosynthetic process; GO:0019760,glucosinolate metabolic process	Homoserine O-succinyltransferase
BnaA01g06640D	1.71	3.56	2.37	5.72	5.55	6.6	-1.127	0.00116461	down	--	transcription factor IBH1-like 1 isoform X2 [Brassica napus]	RecName: Full=Transcription factor IBH1-like 1 {ECO:0000303|PubMed:24505057}; Short=AtIBL1 {ECO:0000303|PubMed:24505057}; AltName: Full=BHLH transcription factor eta; Short=bHLH eta {ECO:0000312|EMBL:CAE09173.1}; AltName: Full=Basic helix-loop-helix protein 159; Short=AtbHLH159 {ECO:0000303|PubMed:14600211}; Short=bHLH 159; AltName: Full=bHLH transcription factor bHLH159;	SubName: Full=BnaA01g06640D protein {ECO:0000313|EMBL:CDY28185.1};	--	GO:0005634,nucleus; GO:0003677,DNA binding; GO:0003700,DNA-binding transcription factor activity; GO:0046983,protein dimerization activity; GO:0009742,brassinosteroid mediated signaling pathway; GO:0009740,gibberellic acid mediated signaling pathway; GO:0040008,regulation of growth; GO:0006351,transcription, DNA-templated	--
BnaA01g06730D	0.82	1.13	3.06	13.88	7.5	13.5	-2.697	2.43943e-09	down	K08235 xyloglucan:xyloglucosyl transferase [EC:2.4.1.207] | (RefSeq) probable xyloglucan endotransglucosylase/hydrolase protein 17 (A)	PREDICTED: probable xyloglucan endotransglucosylase/hydrolase protein 17 [Brassica rapa]	RecName: Full=Probable xyloglucan endotransglucosylase/hydrolase protein 17 {ECO:0000303|PubMed:12514239}; Short=At-XTH17 {ECO:0000303|PubMed:12514239}; Short=XTH-17 {ECO:0000303|PubMed:12514239}; EC=2.4.1.207 {ECO:0000305|PubMed:24948835}; Flags: Precursor;	RecName: Full=Xyloglucan endotransglucosylase/hydrolase {ECO:0000256|RuleBase:RU361120}; EC=2.4.1.207 {ECO:0000256|RuleBase:RU361120};	--	GO:0048046,apoplast; GO:0009505,plant-type cell wall; GO:0005886,plasma membrane; GO:0004553,hydrolase activity, hydrolyzing O-glycosyl compounds; GO:0016762,xyloglucan:xyloglucosyl transferase activity; GO:0042546,cell wall biogenesis; GO:0071555,cell wall organization; GO:0010411,xyloglucan metabolic process	Xyloglucan endo-transglycosylase (XET) C-terminus
BnaA01g06740D	0.67	0.88	1.89	17.86	7.45	14.57	-3.429	2.20421e-15	down	K08235 xyloglucan:xyloglucosyl transferase [EC:2.4.1.207] | (RefSeq) probable xyloglucan endotransglucosylase/hydrolase protein 18 (A)	PREDICTED: probable xyloglucan endotransglucosylase/hydrolase protein 18 [Brassica rapa]	RecName: Full=Probable xyloglucan endotransglucosylase/hydrolase protein 18; Short=At-XTH18; Short=XTH-18; EC=2.4.1.207; Flags: Precursor;	RecName: Full=Xyloglucan endotransglucosylase/hydrolase {ECO:0000256|RuleBase:RU361120}; EC=2.4.1.207 {ECO:0000256|RuleBase:RU361120};	--	GO:0048046,apoplast; GO:0005618,cell wall; GO:0005794,Golgi apparatus; GO:0004553,hydrolase activity, hydrolyzing O-glycosyl compounds; GO:0016762,xyloglucan:xyloglucosyl transferase activity; GO:0042546,cell wall biogenesis; GO:0071555,cell wall organization; GO:0010411,xyloglucan metabolic process	Xyloglucan endo-transglycosylase (XET) C-terminus
BnaA01g06750D	26.99	46.19	17.85	11.92	13.18	5.55	1.661	1.26243e-05	up	K08235 xyloglucan:xyloglucosyl transferase [EC:2.4.1.207] | (RefSeq) xyloglucan endotransglucosylase/hydrolase protein 24-like (A)	xyloglucan endotransglucosylase/hydrolase protein 24-like isoform X2 [Brassica napus]	RecName: Full=Xyloglucan endotransglucosylase/hydrolase protein 24; Short=At-XTH24; Short=XTH-24; EC=2.4.1.207; AltName: Full=Endo-xyloglucan transferase; AltName: Full=Meristem protein 5; Short=MERI-5 protein; Short=MERI5 protein; AltName: Full=Xyloglucan endo-1,4-beta-D-glucanase; Flags: Precursor;	RecName: Full=Xyloglucan endotransglucosylase/hydrolase {ECO:0000256|RuleBase:RU361120}; EC=2.4.1.207 {ECO:0000256|RuleBase:RU361120};	--	GO:0048046,apoplast; GO:0005618,cell wall; GO:0005737,cytoplasm; GO:0005794,Golgi apparatus; GO:0009505,plant-type cell wall; GO:0005886,plasma membrane; GO:0004553,hydrolase activity, hydrolyzing O-glycosyl compounds; GO:0016762,xyloglucan:xyloglucosyl transferase activity; GO:0042546,cell wall biogenesis; GO:0009828,plant-type cell wall loosening; GO:0071669,plant-type cell wall organization or…	Xyloglucan endo-transglycosylase (XET) C-terminus
BnaA01g06830D	0.59	0.68	0.29	3.87	1.84	5.37	-2.715	7.39982e-07	down	K00430 peroxidase [EC:1.11.1.7] | (RefSeq) peroxidase 45 (A)	peroxidase 45 [Brassica napus]	RecName: Full=Peroxidase 45; Short=Atperox P45; EC=1.11.1.7; AltName: Full=ATP8a; Flags: Precursor;	RecName: Full=Peroxidase {ECO:0000256|RuleBase:RU362060, ECO:0000256|SAAS:SAAS00709852}; EC=1.11.1.7 {ECO:0000256|RuleBase:RU362060, ECO:0000256|SAAS:SAAS00709852};	--	GO:0005576,extracellular region; GO:0020037,heme binding; GO:0046872,metal ion binding; GO:0004601,peroxidase activity; GO:0042744,hydrogen peroxide catabolic process; GO:0006979,response to oxidative stress	Peroxidase
BnaA01g06860D	0.82	1.31	1.19	4.29	3.3	4.15	-1.721	5.23204e-15	down	--	uncharacterized protein BNAA01G06860D isoform X1 [Brassica napus]	--	SubName: Full=BnaA01g06860D protein {ECO:0000313|EMBL:CDY28163.1};	--	--	Urb2/Npa2 family
BnaA01g07340D	9.03	12.65	13.37	28.81	24.05	34.74	-1.22	8.10472e-10	down	K11434 type I protein arginine methyltransferase [EC:2.1.1.319] | (RefSeq) protein arginine N-methyltransferase 1.1 (A)	PREDICTED: protein arginine N-methyltransferase 1.1 [Brassica rapa]	RecName: Full=Protein arginine N-methyltransferase 1.1; Short=AtPRMT11; EC=2.1.1.319; AltName: Full=Arginine methyltransferase pam1; AltName: Full=Histone-arginine N-methyltransferase PRMT11;	SubName: Full=Uncharacterized protein {ECO:0000313|EnsemblPlants:Bra011118.1-P};	Protein arginine N-methyltransferase PRMT1 and related enzymes	GO:0005737,cytoplasm; GO:0005829,cytosol; GO:0005634,nucleus; GO:0008469,histone-arginine N-methyltransferase activity; GO:0016274,protein-arginine N-methyltransferase activity; GO:0035242,protein-arginine omega-N asymmetric methyltransferase activity; GO:0006355,regulation of transcription, DNA-templated; GO:0006351,transcription, DNA-templated	Conserved hypothetical protein 95
BnaA01g07550D	3.7	5.15	6.26	14.12	9.74	15.62	-1.283	3.42622e-07	down	--	uncharacterized protein BNAA01G07550D isoform X1 [Brassica napus]	--	SubName: Full=BnaA01g07550D protein {ECO:0000313|EMBL:CDY48610.1};	--	--	Protein of unknown function (DUF1005)
BnaA01g07930D	1.18	1.54	1.19	2.36	3.38	2.92	-1.05	0.00594489	down	K14651 transcription initiation factor TFIID subunit 15 | (RefSeq) uncharacterized protein LOC7476292 isoform X1 (A)	BnaA01g07930D [Brassica napus]	--	SubName: Full=BnaA01g07930D protein {ECO:0000313|EMBL:CDY35238.1};	--	--	Zn-finger in Ran binding protein and others
BnaA01g08020D	2.69	4.25	3.45	11.29	7.52	11.95	-1.463	3.23755e-08	down	K00924 kinase [EC:2.7.1.-] | (RefSeq) casein kinase 1-like protein 3 (A)	BnaA01g08020D [Brassica napus]	RecName: Full=Casein kinase 1-like protein 3 {ECO:0000305}; EC=2.7.11.1 {ECO:0000269|PubMed:23897926}; AltName: Full=Protein CASEIN KINASE I-LIKE 3 {ECO:0000303|PubMed:16126836}; Short=CK1.3 {ECO:0000303|PubMed:23897926};	SubName: Full=BnaA01g08020D protein {ECO:0000313|EMBL:CDY35229.1};	Casein kinase (serine/threonine/tyrosine protein kinase)	GO:0005737,cytoplasm; GO:0005634,nucleus; GO:0005524,ATP binding; GO:0004674,protein serine/threonine kinase activity; GO:0009785,blue light signaling pathway; GO:0006897,endocytosis; GO:0018105,peptidyl-serine phosphorylation; GO:0009640,photomorphogenesis; GO:0008360,regulation of cell shape; GO:0009637,response to blue light	Lipopolysaccharide kinase (Kdo/WaaP) family
BnaA01g08170D	0	0.21	0.2	10.96	18.67	14.79	-6.668	5.28105e-39	down	K11816 indole-3-pyruvate monooxygenase [EC:1.14.13.168] | (RefSeq) probable indole-3-pyruvate monooxygenase YUCCA8 (A)	probable indole-3-pyruvate monooxygenase YUCCA8 [Brassica napus]	RecName: Full=Probable indole-3-pyruvate monooxygenase YUCCA8; EC=1.14.13.168; AltName: Full=Flavin-containing monooxygenase YUCCA8;	RecName: Full=Flavin-containing monooxygenase {ECO:0000256|RuleBase:RU361177}; EC=1.-.-.- {ECO:0000256|RuleBase:RU361177};	Flavin-containing monooxygenase	GO:0050660,flavin adenine dinucleotide binding; GO:0103075,indole-3-pyruvate monooxygenase activity; GO:0004499,N,N-dimethylaniline monooxygenase activity; GO:0050661,NADP binding; GO:0009851,auxin biosynthetic process; GO:0009742,brassinosteroid mediated signaling pathway; GO:0010600,regulation of auxin biosynthetic process; GO:0009735,response to cytokinin	HI0933-like protein
BnaA01g08240D	24.01	17.65	22.75	5.23	6.55	5.05	2.035	3.48139e-24	up	K01592 tyrosine decarboxylase [EC:4.1.1.25] | (RefSeq) probable tyrosine decarboxylase 2 (A)	BnaA01g08240D [Brassica napus]	RecName: Full=Probable tyrosine decarboxylase 2; EC=4.1.1.25;	SubName: Full=BnaA01g08240D protein {ECO:0000313|EMBL:CDY35207.1};	Aromatic-L-amino-acid/L-histidine decarboxylase	GO:0030170,pyridoxal phosphate binding; GO:0004837,tyrosine decarboxylase activity; GO:0006520,cellular amino acid metabolic process	Aminotransferase class I and II
BnaA01g08260D	43.63	43.35	43.01	17.19	24.91	18.21	1.202	1.73078e-09	up	K08903 photosystem II 13kDa protein | (RefSeq) photosystem II reaction center PSB28 protein, chloroplastic (A)	BnaA01g08260D [Brassica napus]	RecName: Full=Photosystem II reaction center PSB28 protein, chloroplastic; AltName: Full=Photosystem II protein W-like; Flags: Precursor;	RecName: Full=Photosystem II reaction center Psb28 protein {ECO:0000256|RuleBase:RU003509};	--	GO:0009535,chloroplast thylakoid membrane; GO:0009654,photosystem II oxygen evolving complex; GO:0015979,photosynthesis	Psb28 protein
BnaA01g08360D	3.06	4.86	5.09	12.81	11.17	15.81	-1.513	2.07898e-09	down	K17081 prohibitin 2 | (RefSeq) prohibitin-1, mitochondrial (A)	PREDICTED: prohibitin-1, mitochondrial [Brassica rapa]	RecName: Full=Prohibitin-1, mitochondrial; Short=Atphb1;	SubName: Full=Uncharacterized protein {ECO:0000313|EnsemblPlants:Bo1g017400.1};	Prohibitin-like protein	GO:0016021,integral component of membrane; GO:0005747,mitochondrial respiratory chain complex I; GO:0005739,mitochondrion; GO:0005774,vacuolar membrane	SPFH domain / Band 7 family
BnaA01g08500D	0.68	0.88	1.35	3.03	2.46	2.87	-1.421	1.12409e-07	down	K15333 tRNA guanosine-2'-O-methyltransferase [EC:2.1.1.34] | (RefSeq) uncharacterized LOC103855553 (A)	PREDICTED: uncharacterized protein LOC103855553 [Brassica rapa]	--	SubName: Full=Uncharacterized protein {ECO:0000313|EnsemblPlants:Bra040168.1-P};	RNA Methylase, SpoU family	--	SpoU rRNA Methylase family
BnaA01g08510D	1.59	2.2	3.7	0.73	0.48	0.64	2.116	0.000484384	up	K06268 serine/threonine-protein phosphatase 2B regulatory subunit | (RefSeq) calcineurin B-like protein 1 (A)	PREDICTED: calcineurin B-like protein 1 [Brassica rapa]	RecName: Full=Calcineurin B-like protein 1; AltName: Full=SOS3-like calcium-binding protein 5;	SubName: Full=Uncharacterized protein {ECO:0000313|EnsemblPlants:Bra040169.1-P};	Ca2+/calmodulin-dependent protein phosphatase (calcineurin subunit B), EF-Hand superfamily protein	GO:0005737,cytoplasm; GO:0005886,plasma membrane; GO:0090406,pollen tube; GO:0005509,calcium ion binding; GO:0019900,kinase binding; GO:0009738,abscisic acid-activated signaling pathway; GO:0019722,calcium-mediated signaling; GO:0009860,pollen tube growth; GO:0009409,response to cold; GO:0006970,response to osmotic stress; GO:0009651,response to salt stress; GO:0009414,response to water deprivati…	EF-hand domain
BnaA01g08710D	34.12	31.73	23.77	12.28	11.4	11.63	1.446	7.7831e-15	up	K01883 cysteinyl-tRNA synthetase [EC:6.1.1.16] | (RefSeq) cysteine--tRNA ligase-like (A)	BnaC01g10370D [Brassica napus]	--	SubName: Full=BnaC01g10370D protein {ECO:0000313|EMBL:CDY44512.1};	--	--	CPBP intramembrane metalloprotease
BnaA01g08750D	8.44	7	6.9	5.28	2.15	4.18	1.056	0.000417015	up	K13422 transcription factor MYC2 | (RefSeq) transcription factor MYC4 (A)	transcription factor MYC4 [Brassica napus]	RecName: Full=Transcription factor MYC4; Short=AtMYC4; AltName: Full=Basic helix-loop-helix protein 4; Short=AtbHLH4; Short=bHLH 4; AltName: Full=Transcription factor EN 37; AltName: Full=bHLH transcription factor bHLH004;	SubName: Full=BnaC01g10420D protein {ECO:0000313|EMBL:CDY44507.1};	--	GO:0005634,nucleus; GO:0043425,bHLH transcription factor binding; GO:0003677,DNA binding; GO:0003700,DNA-binding transcription factor activity; GO:0046983,protein dimerization activity; GO:0009718,anthocyanin-containing compound biosynthetic process; GO:0006952,defense response; GO:0045893,positive regulation of transcription, DNA-templated; GO:0006355,regulation of transcription, DNA-templated; …	Bap31/Bap29 cytoplasmic coiled-coil domain
BnaA01g08860D	9.4	12.35	7.75	5.97	4	4.61	1.121	2.26473e-05	up	K20279 synaptojanin [EC:3.1.3.36] | (RefSeq) type IV inositol polyphosphate 5-phosphatase 3 (A)	type I inositol polyphosphate 5-phosphatase 2-like [Brassica napus]	RecName: Full=Type I inositol polyphosphate 5-phosphatase 2 {ECO:0000303|PubMed:11402208}; Short=At5PTase2 {ECO:0000303|PubMed:11402208}; EC=3.1.3.56 {ECO:0000269|PubMed:11340187};	SubName: Full=Uncharacterized protein {ECO:0000313|EnsemblPlants:Bra013275.1-P};	Inositol polyphosphate 5-phosphatase and related proteins	GO:0052659,inositol-1,3,4,5-tetrakisphosphate 5-phosphatase activity; GO:0052658,inositol-1,4,5-trisphosphate 5-phosphatase activity; GO:0004445,inositol-polyphosphate 5-phosphatase activity; GO:0034485,phosphatidylinositol-3,4,5-trisphosphate 5-phosphatase activity; GO:0004439,phosphatidylinositol-4,5-bisphosphate 5-phosphatase activity; GO:0009738,abscisic acid-activated signaling pathway; GO:0…	Endonuclease/Exonuclease/phosphatase family
BnaA01g08870D	6.84	8.49	5.47	2.87	2.41	3.31	1.373	2.11839e-05	up	K20279 synaptojanin [EC:3.1.3.36] | (RefSeq) type IV inositol polyphosphate 5-phosphatase 3-like (A)	PREDICTED: type I inositol polyphosphate 5-phosphatase 2-like [Brassica rapa]	RecName: Full=Type I inositol polyphosphate 5-phosphatase 2 {ECO:0000303|PubMed:11402208}; Short=At5PTase2 {ECO:0000303|PubMed:11402208}; EC=3.1.3.56 {ECO:0000269|PubMed:11340187};	SubName: Full=Uncharacterized protein {ECO:0000313|EnsemblPlants:Bo1g019160.1};	Inositol polyphosphate 5-phosphatase and related proteins	GO:0052659,inositol-1,3,4,5-tetrakisphosphate 5-phosphatase activity; GO:0052658,inositol-1,4,5-trisphosphate 5-phosphatase activity; GO:0004445,inositol-polyphosphate 5-phosphatase activity; GO:0034485,phosphatidylinositol-3,4,5-trisphosphate 5-phosphatase activity; GO:0004439,phosphatidylinositol-4,5-bisphosphate 5-phosphatase activity; GO:0009738,abscisic acid-activated signaling pathway; GO:0…	Endonuclease/Exonuclease/phosphatase family
BnaA01g09150D	14.96	11.73	13.73	8.35	6.59	6.33	1.032	8.45883e-06	up	--	PREDICTED: F-box protein At4g18380 [Brassica rapa]	RecName: Full=F-box protein At4g18380;	SubName: Full=Uncharacterized protein {ECO:0000313|EnsemblPlants:Bra013303.1-P};	--	GO:0009506,plasmodesma; GO:0009736,cytokinin-activated signaling pathway; GO:0009914,hormone transport	--
BnaA01g09200D	77.5	56.38	81.89	37.09	18.51	23.74	1.553	6.01136e-09	up	--	PREDICTED: uncharacterized protein LOC103856342 [Brassica rapa]	--	SubName: Full=Uncharacterized protein {ECO:0000313|EnsemblPlants:Bo1g019560.1};	--	--	--
BnaA01g09360D	7.86	7.59	4.99	3.07	2.28	3.5	1.31	2.82279e-06	up	K03252 translation initiation factor 3 subunit C | (RefSeq) eukaryotic translation initiation factor 3 subunit C-like (A)	uncharacterized protein LOC106425114 isoform X1 [Brassica napus]	--	SubName: Full=Uncharacterized protein {ECO:0000313|EnsemblPlants:Bo1g019660.1};	--	--	Protein of unknown function (DUF707)
BnaA01g09470D	4.17	3.25	3.71	1.69	1.17	2.19	1.241	6.29909e-05	up	--	uncharacterized protein LOC106404892 [Brassica napus]	--	SubName: Full=Uncharacterized protein {ECO:0000313|EnsemblPlants:Bra013335.1-P};	--	--	Protein of unknown function (DUF688)
BnaA01g09550D	17.56	16.04	16.78	5.04	7.29	6.8	1.492	5.25371e-10	up	--	PREDICTED: uncharacterized protein LOC103856784 isoform X2 [Brassica rapa]	--	SubName: Full=Uncharacterized protein {ECO:0000313|EnsemblPlants:Bra013343.1-P};	--	--	Rho termination factor, N-terminal domain
BnaA01g09710D	6.54	6.64	6.31	14.26	13.66	16.05	-1.074	6.00726e-13	down	K14791 periodic tryptophan protein 1 | (RefSeq) periodic tryptophan protein 1 homolog (A)	PREDICTED: periodic tryptophan protein 1 homolog [Brassica rapa]	RecName: Full=Peroxisome biogenesis protein 7; AltName: Full=Peroxin-7; Short=AtPEX7; AltName: Full=Peroxisomal targeting signal type 2 receptor; AltName: Full=Pex7p;	SubName: Full=Uncharacterized protein {ECO:0000313|EnsemblPlants:Bra013360.1-P};	WD40 repeat-containing protein	GO:0080008,Cul4-RING E3 ubiquitin ligase complex; GO:0005778,peroxisomal membrane; GO:0006625,protein targeting to peroxisome	Nucleoporin Nup120/160
BnaA01g09720D	0.91	1.26	0.8	3.63	4.05	2.12	-1.623	0.000228964	down	K09874 aquaporin NIP | (RefSeq) aquaporin NIP1-2-like (A)	aquaporin NIP1-2-like [Brassica napus]	RecName: Full=Aquaporin NIP1-2; AltName: Full=NOD26-like intrinsic protein 1-2; Short=AtNIP1;2; AltName: Full=Nodulin-26-like major intrinsic protein 2; Short=NodLikeMip2; Short=Protein NLM2;	SubName: Full=Uncharacterized protein {ECO:0000313|EnsemblPlants:Bra013361.1-P};	Aquaporin (major intrinsic protein family)	GO:0005887,integral component of plasma membrane; GO:0005886,plasma membrane; GO:0015105,arsenite transmembrane transporter activity; GO:0015250,water channel activity; GO:0015700,arsenite transport; GO:0080170,hydrogen peroxide transmembrane transport; GO:0046685,response to arsenic-containing substance	Major intrinsic protein
BnaA01g09890D	30.42	46.21	26.43	84.64	85.04	81.26	-1.186	5.38281e-09	down	K01784 UDP-glucose 4-epimerase [EC:5.1.3.2] | (RefSeq) uncharacterized protein LOC110879761 isoform X1 (A)	uncharacterized protein LOC106432780 isoform X1 [Brassica napus]	--	SubName: Full=Uncharacterized protein {ECO:0000313|EnsemblPlants:Bra013377.1-P};	--	--	Tetratricopeptide repeat
BnaA01g09990D	12.96	19.04	17.55	67.27	42.05	71.32	-1.76	3.57982e-16	down	K19882 O-palmitoleoyl-L-serine hydrolase [EC:3.1.1.98] | (RefSeq) pectin acetylesterase 7 (A)	pectin acetylesterase 7 [Brassica napus]	RecName: Full=Pectin acetylesterase 7 {ECO:0000303|PubMed:25115560}; EC=3.1.1.- {ECO:0000305}; Flags: Precursor;	RecName: Full=Pectin acetylesterase {ECO:0000256|RuleBase:RU363114}; EC=3.1.1.- {ECO:0000256|RuleBase:RU363114};	Pectin acetylesterase and similar proteins	GO:0005618,cell wall; GO:0005576,extracellular region; GO:0016020,membrane; GO:0009505,plant-type cell wall; GO:0009506,plasmodesma; GO:0052793,pectin acetylesterase activity; GO:0071555,cell wall organization	Pectinacetylesterase
BnaA01g10000D	56.45	74.01	41.16	147.11	103.13	121.39	-1.01	2.83216e-06	down	K19882 O-palmitoleoyl-L-serine hydrolase [EC:3.1.1.98] | (RefSeq) pectin acetylesterase 8-like isoform X1 (A)	PREDICTED: pectin acetylesterase 8 [Brassica rapa]	RecName: Full=Pectin acetylesterase 8 {ECO:0000303|PubMed:25115560}; EC=3.1.1.- {ECO:0000305}; Flags: Precursor;	RecName: Full=Pectin acetylesterase {ECO:0000256|RuleBase:RU363114}; EC=3.1.1.- {ECO:0000256|RuleBase:RU363114};	Pectin acetylesterase and similar proteins	GO:0005576,extracellular region; GO:0009505,plant-type cell wall; GO:0052793,pectin acetylesterase activity; GO:0071555,cell wall organization	Pectinacetylesterase
BnaA01g10020D	6.06	4.04	3.97	1.62	0.86	1.6	1.894	1.36108e-08	up	K14794 ribosomal RNA-processing protein 12 | (RefSeq) hypothetical protein (A)	protein NUCLEAR FUSION DEFECTIVE 4-like [Brassica napus]	RecName: Full=Protein NUCLEAR FUSION DEFECTIVE 4 {ECO:0000303|PubMed:16698901};	SubName: Full=Uncharacterized protein {ECO:0000313|EnsemblPlants:Bra013398.1-P};	--	GO:0016021,integral component of membrane; GO:0000741,karyogamy; GO:0010197,polar nucleus fusion; GO:0009651,response to salt stress	Nodulin-like
BnaA01g10360D	4.82	4.33	5.16	10.82	7.97	13.91	-1.088	5.57454e-06	down	K09699 2-oxoisovalerate dehydrogenase E2 component (dihydrolipoyl transacylase) [EC:2.3.1.168] | (RefSeq) multiple organellar RNA editing factor 3, mitochondrial-like (A)	multiple organellar RNA editing factor 1, mitochondrial-like [Brassica napus]	RecName: Full=Multiple organellar RNA editing factor 1, mitochondrial {ECO:0000305}; AltName: Full=RNA editing-interacting protein 8 {ECO:0000303|PubMed:23818871}; Flags: Precursor;	SubName: Full=Uncharacterized protein {ECO:0000313|EnsemblPlants:Bra013439.1-P};	--	GO:0009507,chloroplast; GO:0005739,mitochondrion; GO:1900865,chloroplast RNA modification; GO:1900864,mitochondrial RNA modification; GO:0006397,mRNA processing	--
BnaA01g10460D	10.43	10.08	9.96	4.42	3.65	4.06	1.432	3.88385e-16	up	--	PREDICTED: galactan beta-1,4-galactosyltransferase GALS3 [Brassica rapa]	RecName: Full=Galactan beta-1,4-galactosyltransferase GALS3 {ECO:0000305}; EC=2.4.1.- {ECO:0000305}; AltName: Full=Beta-1,4-galactan synthase; AltName: Full=Galactan synthase 3 {ECO:0000303|PubMed:23243126};	SubName: Full=Uncharacterized protein {ECO:0000313|EnsemblPlants:Bo1g022230.1};	Extracellular protein with conserved cysteines	GO:0000139,Golgi membrane; GO:0016021,integral component of membrane; GO:0016757,transferase activity, transferring glycosyl groups; GO:0042546,cell wall biogenesis; GO:0071555,cell wall organization	Glycosyl transferase family 2
BnaA01g10520D	17.54	12.5	9.51	7.22	2.38	8.79	1.222	0.00398099	up	--	--	--	SubName: Full=Uncharacterized protein {ECO:0000313|EnsemblPlants:Bra037269.1-P};	--	--	--
BnaA01g11290D	6.26	8.02	9.06	4.46	3.36	4.42	1.031	0.000601803	up	--	uncharacterized protein LOC111200264 [Brassica napus]	--	SubName: Full=Uncharacterized protein {ECO:0000313|EnsemblPlants:Bra013527.1-P};	--	--	--
BnaA01g11320D	13.37	13.04	13.52	8.78	6.35	5.55	1.054	9.10691e-07	up	K20884 riboflavin kinase / FMN hydrolase [EC:2.7.1.26 3.1.3.102] | (RefSeq) bifunctional riboflavin kinase/FMN phosphatase (A)	bifunctional riboflavin kinase/FMN phosphatase [Brassica napus]	RecName: Full=Bifunctional riboflavin kinase/FMN phosphatase; Includes: RecName: Full=FMN phosphatase {ECO:0000303|PubMed:16183635}; EC=3.1.3.102 {ECO:0000269|PubMed:16183635, ECO:0000269|PubMed:22002057}; AltName: Full=FMN phosphohydrolase {ECO:0000303|PubMed:16183635}; Includes: RecName: Full=Riboflavin kinase {ECO:0000303|PubMed:16183635}; EC=2.7.1.26 {ECO:0000269|PubMed:16183635, ECO:0000269|…	SubName: Full=Uncharacterized protein {ECO:0000313|EnsemblPlants:Bo1g024190.1};	Riboflavin kinase	GO:0005524,ATP binding; GO:0003919,FMN adenylyltransferase activity; GO:0016787,hydrolase activity; GO:0000287,magnesium ion binding; GO:0008531,riboflavin kinase activity; GO:0009398,FMN biosynthetic process; GO:0009231,riboflavin biosynthetic process	Haloacid dehalogenase-like hydrolase
BnaA01g11350D	1.72	2.41	1.99	6.22	6.78	6.33	-1.558	1.55905e-07	down	K03351 anaphase-promoting complex subunit 4 | (RefSeq) anaphase-promoting complex subunit 4 (A)	F-box protein SKIP27 [Brassica napus]	RecName: Full=F-box protein SKIP27; AltName: Full=SKP1-interacting partner 27;	SubName: Full=Uncharacterized protein {ECO:0000313|EnsemblPlants:Bra013532.1-P};	--	GO:0005634,nucleus; GO:0016567,protein ubiquitination	--
BnaA01g11430D	43.7	32.98	34.45	19.62	17.63	21.13	1.032	7.97708e-09	up	K00344 NADPH2:quinone reductase [EC:1.6.5.5] | (RefSeq) quinone oxidoreductase PIG3 (A)	quinone oxidoreductase PIG3-like isoform X1 [Brassica napus]	RecName: Full=NADPH-dependent alkenal/one oxidoreductase, chloroplastic {ECO:0000303|PubMed:21169366}; Short=AtAOR {ECO:0000303|PubMed:21169366}; EC=1.3.1.- {ECO:0000269|PubMed:21169366}; Flags: Precursor;	SubName: Full=Uncharacterized protein {ECO:0000313|EnsemblPlants:Bra013540.1-P};	Zinc-binding oxidoreductase	GO:0048046,apoplast; GO:0009507,chloroplast; GO:0009941,chloroplast envelope; GO:0009570,chloroplast stroma; GO:0010319,stromule; GO:0009579,thylakoid; GO:0035798,2-alkenal reductase (NADP+) activity; GO:0035671,enone reductase activity; GO:0008270,zinc ion binding; GO:0055114,oxidation-reduction process; GO:0009409,response to cold	Zinc-binding dehydrogenase
BnaA01g11640D	5.75	7.13	6.29	17.42	15.59	16.04	-1.255	2.33518e-10	down	K13989 Derlin-2/3 | (RefSeq) derlin-2.1 (A)	derlin-2.1 [Brassica napus]	RecName: Full=Derlin-2.1; AltName: Full=AtDerlin2-1;	RecName: Full=Derlin {ECO:0000256|RuleBase:RU363059};	Predicted membrane protein	GO:0005789,endoplasmic reticulum membrane; GO:0016021,integral component of membrane	Der1-like family
BnaA01g11670D	13.3	22.53	12.01	41.37	53.88	37.31	-1.379	3.23334e-07	down	K13993 HSP20 family protein | (RefSeq) 15.4 kDa class V heat shock protein isoform X1 (A)	PREDICTED: 15.4 kDa class V heat shock protein [Raphanus sativus]	RecName: Full=15.4 kDa class V heat shock protein; AltName: Full=15.4 kDa heat shock protein; Short=AtHsp15.4;	SubName: Full=Uncharacterized protein {ECO:0000313|EnsemblPlants:Bo1g025630.1};	Molecular chaperone (small heat-shock protein Hsp26/Hsp42)	GO:0005737,cytoplasm; GO:0009408,response to heat	HSP20-like domain found in ArsA
BnaA01g11680D	0.61	1.08	0.89	3.28	2.88	3.35	-1.785	1.45425e-09	down	K17710 pentatricopeptide repeat domain-containing protein 1 | (RefSeq) pentatricopeptide repeat-containing protein At5g25630-like (A)	PREDICTED: pentatricopeptide repeat-containing protein At4g21880, mitochondrial isoform X2 [Brassica rapa]	RecName: Full=Pentatricopeptide repeat-containing protein At4g21880, mitochondrial; Flags: Precursor;	SubName: Full=Uncharacterized protein {ECO:0000313|EnsemblPlants:Bra013567.1-P};	FOG: PPR repeat	GO:0043231,intracellular membrane-bounded organelle; GO:0005739,mitochondrion; GO:0004519,endonuclease activity; GO:0003723,RNA binding; GO:0009451,RNA modification	Tetratricopeptide repeat
BnaA01g11760D	39.2	35.83	12.56	4.15	4.4	6.1	2.686	1.41684e-13	up	K03327 multidrug resistance protein, MATE family | (RefSeq) protein TRANSPARENT TESTA 12-like (A)	PREDICTED: protein TRANSPARENT TESTA 12-like [Brassica oleracea var. oleracea]	RecName: Full=Protein DETOXIFICATION 39 {ECO:0000303|PubMed:11739388}; Short=AtDTX39 {ECO:0000303|PubMed:11739388}; AltName: Full=Multidrug and toxic compound extrusion protein 39 {ECO:0000305}; Short=MATE protein 39 {ECO:0000305};	RecName: Full=Protein DETOXIFICATION {ECO:0000256|RuleBase:RU004914}; AltName: Full=Multidrug and toxic compound extrusion protein {ECO:0000256|RuleBase:RU004914};	Uncharacterized membrane protein, predicted efflux pump	GO:0016021,integral component of membrane; GO:0015297,antiporter activity; GO:0015238,drug transmembrane transporter activity	MatE
BnaA01g11790D	4.01	2.47	3.14	0.53	1.41	0.69	1.966	4.94668e-06	up	K13412 calcium-dependent protein kinase [EC:2.7.11.1] | (RefSeq) calcium-dependent protein kinase 15 (A)	calcium-dependent protein kinase 15 [Brassica napus]	RecName: Full=Calcium-dependent protein kinase 15; EC=2.7.11.1;	SubName: Full=Uncharacterized protein {ECO:0000313|EnsemblPlants:Bra013575.1-P};	Ca2+/calmodulin-dependent protein kinase, EF-Hand protein superfamily	GO:0005737,cytoplasm; GO:0016020,membrane; GO:0005634,nucleus; GO:0005524,ATP binding; GO:0005509,calcium ion binding; GO:0009931,calcium-dependent protein serine/threonine kinase activity; GO:0005516,calmodulin binding; GO:0004683,calmodulin-dependent protein kinase activity; GO:0009738,abscisic acid-activated signaling pathway; GO:0035556,intracellular signal transduction; GO:0018105,peptidyl-s…	EF-hand domain
BnaA01g11840D	8.16	9.58	8.7	26.24	14.35	27.29	-1.252	1.56215e-07	down	K05907 adenylyl-sulfate reductase (glutathione) [EC:1.8.4.9] | (RefSeq) 5'-adenylylsulfate reductase 3, chloroplastic (A)	PREDICTED: 5'-adenylylsulfate reductase 3, chloroplastic isoform X1 [Brassica rapa]	RecName: Full=5'-adenylylsulfate reductase 3, chloroplastic; EC=1.8.4.9; AltName: Full=3'-phosphoadenosine-5'-phosphosulfate reductase homolog 26; Short=PAPS reductase homolog 26; Short=Prh-26; AltName: Full=Adenosine 5'-phosphosulfate 5'-adenylylsulfate sulfotransferase 3; Short=APS sulfotransferase 3; AltName: Full=Thioredoxin-independent APS reductase 3; Flags: Precursor;	SubName: Full=Uncharacterized protein {ECO:0000313|EnsemblPlants:Bo1g025830.1};	Phosphoadenosine phosphosulfate reductase	GO:0009507,chloroplast; GO:0051539,4 iron, 4 sulfur cluster binding; GO:0033741,adenylyl-sulfate reductase (glutathione) activity; GO:0009973,adenylyl-sulfate reductase activity; GO:0046872,metal ion binding; GO:0004604,phosphoadenylyl-sulfate reductase (thioredoxin) activity; GO:0045454,cell redox homeostasis; GO:0019344,cysteine biosynthetic process; GO:0000103,sulfate assimilation; GO:0019419,…	Redoxin
BnaA01g11930D	2.37	3.38	3.62	1.72	0.87	1.99	1.133	0.000797706	up	K04733 interleukin-1 receptor-associated kinase 4 [EC:2.7.11.1] | (RefSeq) protein STRUBBELIG-RECEPTOR FAMILY 8-like (A)	protein STRUBBELIG-RECEPTOR FAMILY 8 isoform X1 [Brassica napus]	RecName: Full=Protein STRUBBELIG-RECEPTOR FAMILY 8; AltName: Full=Leucine-rich repeat receptor kinase-like protein SRF8; Flags: Precursor;	SubName: Full=Uncharacterized protein {ECO:0000313|EnsemblPlants:Bra013591.1-P};	Serine/threonine protein kinase	GO:0016021,integral component of membrane; GO:0005886,plasma membrane; GO:0005524,ATP binding; GO:0004675,transmembrane receptor protein serine/threonine kinase activity; GO:0007166,cell surface receptor signaling pathway; GO:0006468,protein phosphorylation	Cysteine and tyrosine-rich protein 1
BnaA01g12020D	18.85	17.85	17	4.77	3.21	3.99	2.271	1.84028e-40	up	K21867 potassium channel | (RefSeq) potassium channel AKT2/3 (A)	potassium channel AKT2/3 [Brassica napus]	RecName: Full=Potassium channel AKT2/3;	SubName: Full=Uncharacterized protein {ECO:0000313|EnsemblPlants:Bra013599.1-P};	K+-channel ERG and related proteins, contain PAS/PAC sensor domain	GO:0005789,endoplasmic reticulum membrane; GO:0005887,integral component of plasma membrane; GO:0009506,plasmodesma; GO:0042802,identical protein binding; GO:0005249,voltage-gated potassium channel activity; GO:0034765,regulation of ion transmembrane transport; GO:0042391,regulation of membrane potential; GO:0009737,response to abscisic acid	Ankyrin repeat
BnaA01g12060D	72.15	54.42	49.01	17.84	16.38	15.6	1.921	3.6899e-24	up	K17637 exocyst complex component 2 | (RefSeq) exocyst complex component SEC5A-like (A)	RecName: Full=Plastid lipid-associated protein 2, chloroplastic; Flags: Precursor AAK57565.1 plastid-lipid associated protein PAP2 [Brassica rapa subsp. oleifera]	RecName: Full=Plastid lipid-associated protein 2, chloroplastic; Flags: Precursor;	SubName: Full=Uncharacterized protein {ECO:0000313|EnsemblPlants:Bra013602.1-P};	--	GO:0009507,chloroplast	PAP_fibrillin
BnaA01g12090D	31.2	24.59	21.65	8.17	7.17	8.13	1.826	1.2144e-22	up	--	uncharacterized protein BNAA01G12090D [Brassica napus]	--	SubName: Full=Uncharacterized protein {ECO:0000313|EnsemblPlants:Bra013606.1-P};	--	--	Protein of unknown function (DUF3537)
BnaA01g12110D	6.62	7.3	7.42	2.54	2.95	4.29	1.217	0.000268937	up	K22139 mitochondrial pyruvate carrier 2 | (RefSeq) mitochondrial pyruvate carrier 4 (A)	PREDICTED: mitochondrial pyruvate carrier 4 [Brassica rapa]	RecName: Full=Mitochondrial pyruvate carrier 4 {ECO:0000305};	RecName: Full=Mitochondrial pyruvate carrier {ECO:0000256|RuleBase:RU363100};	Uncharacterized conserved protein	GO:0031305,integral component of mitochondrial inner membrane; GO:0005739,mitochondrion; GO:0050833,pyruvate transmembrane transporter activity; GO:0006850,mitochondrial pyruvate transmembrane transport	Mitochondrial pyruvate carriers
BnaA01g12320D	1.85	1.62	2.65	1.03	0.85	1.27	1.059	0.0111546	up	K01087 trehalose 6-phosphate phosphatase [EC:3.1.3.12] | (RefSeq) probable trehalose-phosphate phosphatase G (A)	PREDICTED: probable trehalose-phosphate phosphatase G [Brassica rapa]	RecName: Full=Probable trehalose-phosphate phosphatase G; Short=AtTPPG; EC=3.1.3.12; AltName: Full=Trehalose 6-phosphate phosphatase; AltName: Full=Trehalose-phosphate phosphatase 6;	RecName: Full=Trehalose 6-phosphate phosphatase {ECO:0000256|RuleBase:RU361117}; EC=3.1.3.12 {ECO:0000256|RuleBase:RU361117};	Trehalose-6-phosphate synthase component TPS1 and related subunits	GO:0004805,trehalose-phosphatase activity; GO:0005992,trehalose biosynthetic process	haloacid dehalogenase-like hydrolase
BnaA01g12340D	2.42	0.8	10.57	0	0.33	0.53	4.06	4.87158e-05	up	K14488 SAUR family protein | (RefSeq) auxin-responsive protein SAUR36 (A)	PREDICTED: auxin-responsive protein SAUR36 [Brassica rapa]	RecName: Full=Auxin-responsive protein SAUR36 {ECO:0000305}; AltName: Full=Protein RESPONSE TO AUXINS AND GIBBERELLINS 1 {ECO:0000303|PubMed:23503980}; AltName: Full=Protein SENESCENCE-ASSOCIATED GENE 201 {ECO:0000305}; AltName: Full=Protein SMALL AUXIN UP RNA 36 {ECO:0000303|PubMed:12036261};	SubName: Full=Uncharacterized protein {ECO:0000313|EnsemblPlants:Bra013630.1-P};	--	GO:0005634,nucleus; GO:0009734,auxin-activated signaling pathway; GO:0007275,multicellular organism development; GO:1900057,positive regulation of leaf senescence; GO:0040008,regulation of growth; GO:0010029,regulation of seed germination	Methylene-tetrahydrofolate reductase C terminal
BnaA01g12380D	40.74	47.18	35.89	145.38	91.09	125.95	-1.443	1.48743e-15	down	K00512 steroid 17alpha-monooxygenase / 17alpha-hydroxyprogesterone deacetylase [EC:1.14.14.19 1.14.14.32] | (RefSeq) geraniol 8-hydroxylase-like (A)	geraniol 8-hydroxylase-like [Brassica napus]	RecName: Full=3,9-dihydroxypterocarpan 6A-monooxygenase; EC=1.14.13.28; AltName: Full=Cytochrome P450 93A1; AltName: Full=Dihydroxypterocarpan 6a-hydroxylase; Short=D6aH;	SubName: Full=Uncharacterized protein {ECO:0000313|EnsemblPlants:Bo1g028540.1};	Cytochrome P450 CYP2 subfamily	GO:0016020,membrane; GO:0047082,3,9-dihydroxypterocarpan 6a-monooxygenase activity; GO:0020037,heme binding; GO:0005506,iron ion binding; GO:0016709,oxidoreductase activity, acting on paired donors, with incorporation or reduction of molecular oxygen, NAD(P)H as one donor, and incorporation of one atom of oxygen; GO:0006952,defense response; GO:0044550,secondary metabolite biosynthetic process	Cytochrome P450
BnaA01g12460D	4.76	4	3.62	2.36	0.84	1.18	1.617	0.000355504	up	--	BnaA01g12460D [Brassica napus]	RecName: Full=Uncharacterized protein At4g22758;	SubName: Full=BnaA01g12460D protein {ECO:0000313|EMBL:CDY41293.1};	FOG: PPR repeat	--	SAPK-interacting protein 1 (Sin1), middle CRIM domain
BnaA01g12530D	67.36	54.88	35.51	7	7.15	5.5	3.108	2.41529e-34	up	K05277 leucoanthocyanidin dioxygenase [EC:1.14.11.19] | (RefSeq) ANS, ANS1, ANS2; leucoanthocyanidin dioxygenase (A)	PREDICTED: leucoanthocyanidin dioxygenase [Brassica rapa]	RecName: Full=Leucoanthocyanidin dioxygenase; Short=LDOX; Short=Leucocyanidin oxygenase; EC=1.14.11.19 {ECO:0000269|PubMed:16153644}; AltName: Full=Anthocyanidin synthase; Short=ANS; AltName: Full=Leucoanthocyanidin hydroxylase; AltName: Full=Protein TANNIN DEFICIENT SEED 4; Short=TDS4; AltName: Full=Protein TRANSPARENT TESTA 11; Short=TT11; AltName: Full=Protein TRANSPARENT TESTA 17; Short=TT17;…	SubName: Full=Uncharacterized protein {ECO:0000313|EnsemblPlants:Bra013652.1-P};	Iron/ascorbate family oxidoreductases	GO:0031418,L-ascorbic acid binding; GO:0050589,leucocyanidin oxygenase activity; GO:0046872,metal ion binding; GO:0009718,anthocyanin-containing compound biosynthetic process; GO:0010023,proanthocyanidin biosynthetic process; GO:0009753,response to jasmonic acid; GO:0009611,response to wounding; GO:0007033,vacuole organization	2OG-Fe(II) oxygenase superfamily
BnaA01g12540D	327.35	303.6	302.11	128.37	169.26	127.98	1.227	4.27295e-14	up	--	PREDICTED: PGR5-like protein 1A, chloroplastic isoform X1 [Brassica rapa]	RecName: Full=PGR5-like protein 1A, chloroplastic; AltName: Full=Ferredoxin-plastoquinone reductase 1; Flags: Precursor;	SubName: Full=Uncharacterized protein {ECO:0000313|EnsemblPlants:Bra013653.1-P};	--	GO:0009507,chloroplast; GO:0009534,chloroplast thylakoid; GO:0009535,chloroplast thylakoid membrane; GO:0016021,integral component of membrane; GO:0009579,thylakoid; GO:0042802,identical protein binding; GO:0016730,oxidoreductase activity, acting on iron-sulfur proteins as donors; GO:0019904,protein domain specific binding; GO:0015979,photosynthesis; GO:0009773,photosynthetic electron transport i…	zinc-ribbon domain
BnaA01g12570D	6.24	6.25	3.24	2.35	1.88	2.16	1.404	9.13066e-05	up	K22013 magnesium dechelatase [EC:4.99.1.10] | (RefSeq) protein STAY-GREEN 1, chloroplastic-like (A)	BnaA01g12570D [Brassica napus]	RecName: Full=Protein STAY-GREEN 1, chloroplastic; AltName: Full=Protein NON-YELLOWING 1; AltName: Full=Protein STAYGREEN 1; Flags: Precursor;	SubName: Full=BnaA01g12570D protein {ECO:0000313|EMBL:CDY41282.1};	--	GO:0009535,chloroplast thylakoid membrane; GO:0015996,chlorophyll catabolic process	Staygreen protein
BnaA01g12670D	0.97	0.99	0.6	0.3	0.42	0.35	1.37	0.0110557	up	K04733 interleukin-1 receptor-associated kinase 4 [EC:2.7.11.1] | (RefSeq) cysteine-rich receptor-like protein kinase 14 isoform X1 (A)	BnaA01g12670D [Brassica napus]	RecName: Full=Cysteine-rich receptor-like protein kinase 11; Short=Cysteine-rich RLK11; EC=2.7.11.-; AltName: Full=Receptor-like protein kinase 3; Flags: Precursor;	SubName: Full=BnaA01g12670D protein {ECO:0000313|EMBL:CDY41272.1};	--	GO:0016021,integral component of membrane; GO:0016020,membrane; GO:0005886,plasma membrane; GO:0005524,ATP binding; GO:0004672,protein kinase activity; GO:0004674,protein serine/threonine kinase activity; GO:0009816,defense response to bacterium, incompatible interaction; GO:0006468,protein phosphorylation; GO:0006979,response to oxidative stress	Haspin like kinase domain
BnaA01g12800D	4.33	3.52	2.57	1.24	0.59	0.81	2.094	1.36803e-09	up	--	BnaA01g12800D [Brassica napus]	RecName: Full=SPX domain-containing membrane protein At4g22990;	SubName: Full=BnaA01g12800D protein {ECO:0000313|EMBL:CDY41259.1};	Predicted transporter/transmembrane protein	GO:0016021,integral component of membrane; GO:0055085,transmembrane transport	Sugar (and other) transporter
BnaA01g12890D	11.44	18.26	16.24	33.9	48.93	43.98	-1.372	1.67385e-09	down	K04733 interleukin-1 receptor-associated kinase 4 [EC:2.7.11.1] | (RefSeq) LOC109742393; G-type lectin S-receptor-like serine/threonine-protein kinase At1g34300 (A)	BnaA01g12890D [Brassica napus]	RecName: Full=Pathogenesis-related protein R major form; AltName: Full=Thaumatin-like protein E22; Flags: Precursor;	SubName: Full=BnaA01g12890D protein {ECO:0000313|EMBL:CDY41250.1};	--	GO:0005773,vacuole; GO:0006952,defense response; GO:0009607,response to biotic stimulus	Thaumatin family
BnaA01g13220D	1.14	1.73	1.91	6.52	5.1	6.66	-1.833	2.95583e-15	down	K14794 ribosomal RNA-processing protein 12 | (RefSeq) RRP12-like protein (A)	BnaA01g13220D [Brassica napus]	--	SubName: Full=BnaA01g13220D protein {ECO:0000313|EMBL:CDY44114.1};	Uncharacterized conserved protein	--	non-SMC mitotic condensation complex subunit 1
BnaA01g13390D	23.87	20.44	18.03	11.19	7.83	9.83	1.218	2.77727e-10	up	K01792 glucose-6-phosphate 1-epimerase [EC:5.1.3.15] | (RefSeq) putative glucose-6-phosphate 1-epimerase (A)	BnaA01g13390D [Brassica napus]	RecName: Full=Putative glucose-6-phosphate 1-epimerase {ECO:0000250|UniProtKB:Q03161}; EC=5.1.3.15 {ECO:0000250|UniProtKB:Q03161}; AltName: Full=Putative D-hexose-6-phosphate mutarotase {ECO:0000250|UniProtKB:Q03161}; AltName: Full=Putative apospory-associated protein C;	RecName: Full=Glucose-6-phosphate 1-epimerase {ECO:0000256|PIRNR:PIRNR016020}; EC=5.1.3.15 {ECO:0000256|PIRNR:PIRNR016020};	Uncharacterized enzymes related to aldose 1-epimerase	GO:0030246,carbohydrate binding; GO:0047938,glucose-6-phosphate 1-epimerase activity; GO:0005975,carbohydrate metabolic process	Aldose 1-epimerase
BnaA01g13460D	1.75	2.7	2.83	5.57	6.95	6.03	-1.254	6.76539e-06	down	K01184 polygalacturonase [EC:3.2.1.15] | (RefSeq) polygalacturonase (A)	BnaA01g13460D [Brassica napus]	RecName: Full=Probable polygalacturonase; Short=PG {ECO:0000250|UniProtKB:Q7M1E7}; EC=3.2.1.15; AltName: Full=Pectinase {ECO:0000250|UniProtKB:Q7M1E7};	SubName: Full=BnaA01g13460D protein {ECO:0000313|EMBL:CDY47619.1};	--	GO:0016021,integral component of membrane; GO:0004650,polygalacturonase activity; GO:0005975,carbohydrate metabolic process	Pectate lyase superfamily protein
BnaA01g13500D	7.56	4.4	9.67	3.53	2.74	3.38	1.265	0.000704054	up	--	PREDICTED: uncharacterized protein LOC103861498 [Brassica rapa]	--	SubName: Full=Uncharacterized protein {ECO:0000313|EnsemblPlants:Bra013739.1-P};	--	--	--
BnaA01g13620D	5.68	4.55	4.47	0.65	1.99	0.74	2.217	5.29203e-07	up	K13699 abhydrolase domain-containing protein 5 [EC:2.3.1.51] | (RefSeq) 1-acylglycerol-3-phosphate O-acyltransferase isoform X1 (A)	PREDICTED: uncharacterized protein LOC103861771 [Brassica rapa]	RecName: Full=Probable lysophospholipase BODYGUARD 3 {ECO:0000303|PubMed:16415209}; Short=AtBDG3 {ECO:0000303|PubMed:16415209}; EC=3.1.1.- {ECO:0000305}; Flags: Precursor;	SubName: Full=Uncharacterized protein {ECO:0000313|EnsemblPlants:Bra013766.1-P};	Predicted hydrolase/acyltransferase (alpha/beta hydrolase superfamily)	GO:0005618,cell wall; GO:0005576,extracellular region; GO:0005886,plasma membrane; GO:0016787,hydrolase activity; GO:0071555,cell wall organization	Lipid-droplet associated hydrolase
BnaA01g13720D	2.7	2.22	4.8	8.83	8.25	7.94	-1.267	4.40458e-05	down	K13425 WRKY transcription factor 22 | (RefSeq) probable WRKY transcription factor 27 (A)	BnaA01g13720D [Brassica napus]	RecName: Full=Probable WRKY transcription factor 7; AltName: Full=WRKY DNA-binding protein 7;	SubName: Full=BnaA01g13720D protein {ECO:0000313|EMBL:CDY34269.1};	--	GO:0005634,nucleus; GO:0005516,calmodulin binding; GO:0003700,DNA-binding transcription factor activity; GO:0043565,sequence-specific DNA binding; GO:0006351,transcription, DNA-templated	Plant zinc cluster domain
BnaA01g13770D	4.52	3.42	7.36	18.09	12.4	16.24	-1.507	5.78019e-06	down	--	BnaA01g13770D [Brassica napus]	--	SubName: Full=BnaA01g13770D protein {ECO:0000313|EMBL:CDY34274.1};	--	--	--
BnaA01g13850D	13.22	12.68	10.7	4.4	6.05	4.68	1.372	4.39772e-09	up	K07870 mitochondrial Rho GTPase 1 [EC:3.6.5.-] | (RefSeq) uncharacterized protein LOC103958384 (A)	BnaA01g13850D [Brassica napus]	RecName: Full=Bark storage protein A; Flags: Precursor;	SubName: Full=BnaA01g13850D protein {ECO:0000313|EMBL:CDY34282.1};	--	GO:0003824,catalytic activity; GO:0045735,nutrient reservoir activity; GO:0009116,nucleoside metabolic process	Phosphorylase superfamily
BnaA01g13860D	8.68	8.08	10.68	24.79	29.66	19.55	-1.338	5.49451e-09	down	K07870 mitochondrial Rho GTPase 1 [EC:3.6.5.-] | (RefSeq) uncharacterized protein LOC103958384 (A)	BnaA01g13860D [Brassica napus]	RecName: Full=Bark storage protein A; Flags: Precursor;	SubName: Full=BnaA01g13860D protein {ECO:0000313|EMBL:CDY34283.1};	--	GO:0003824,catalytic activity; GO:0045735,nutrient reservoir activity; GO:0009116,nucleoside metabolic process	Phosphorylase superfamily
BnaA01g13880D	14.45	10.97	23.2	4.53	3.99	5.63	1.879	1.98871e-09	up	K02183 calmodulin | (RefSeq) family of serine hydrolases 3-like (A)	BnaA01g13880D [Brassica napus]	RecName: Full=Rhodanese-like domain-containing protein 6; AltName: Full=Sulfurtransferase 6; Short=AtStr6;	SubName: Full=BnaA01g13880D protein {ECO:0000313|EMBL:CDY34285.1};	Phospholipase/carboxyhydrolase	--	Phospholipase/Carboxylesterase
BnaA01g14020D	6.45	8.77	7.19	1.49	1.8	1.74	2.251	1.12696e-12	up	K15601 lysine-specific demethylase 3 [EC:1.14.11.-] | (RefSeq) lysine-specific demethylase JMJ25-like (A)	BnaA01g14020D [Brassica napus]	RecName: Full=Zinc-finger homeodomain protein 2; Short=AtZHD2; AltName: Full=Homeobox protein 22; Short=AtHB-22; AltName: Full=Protein MATERNAL EFFECT EMBRYO ARREST 68;	SubName: Full=BnaA01g14020D protein {ECO:0000313|EMBL:CDY34299.1};	--	GO:0005634,nucleus; GO:0003677,DNA binding; GO:0046872,metal ion binding; GO:0042803,protein homodimerization activity; GO:0009793,embryo development ending in seed dormancy; GO:0006355,regulation of transcription, DNA-templated; GO:0006351,transcription, DNA-templated	YebG protein
BnaA01g14110D	10.12	11.04	11.02	6.39	5.66	4.78	1.039	5.83286e-07	up	K01076 abhydrolase domain-containing protein 17 [EC:3.1.2.22] | (RefSeq) protein ABHD17B (A)	PREDICTED: protein ABHD17B [Brassica rapa]	--	SubName: Full=Uncharacterized protein {ECO:0000313|EnsemblPlants:Bra013831.1-P};	Predicted alpha/beta hydrolase	--	Chlamydia CHLPS protein (DUF818)
BnaA01g14130D	11.25	9.75	8.38	4.3	3.27	6.89	1.127	7.49952e-05	up	K01728 pectate lyase [EC:4.2.2.2] | (RefSeq) probable pectate lyase 18 (A)	PREDICTED: probable pectate lyase 18 [Brassica oleracea var. oleracea]	RecName: Full=Probable pectate lyase 18; EC=4.2.2.2; AltName: Full=Pectate lyase A10; Flags: Precursor;	RecName: Full=Pectate lyase {ECO:0000256|RuleBase:RU361123}; EC=4.2.2.2 {ECO:0000256|RuleBase:RU361123};	--	GO:0016020,membrane; GO:0046872,metal ion binding; GO:0030570,pectate lyase activity; GO:0045490,pectin catabolic process; GO:0009624,response to nematode	Right handed beta helix region
BnaA01g14320D	5.33	6.63	8	1.78	1.69	1.18	2.211	2.43945e-09	up	K17279 receptor expression-enhancing protein 5/6 | (RefSeq) HVA22-like protein d (A)	BnaA01g14320D [Brassica napus]	RecName: Full=HVA22-like protein d; Short=AtHVA22d;	RecName: Full=HVA22-like protein {ECO:0000256|RuleBase:RU362006};	Protein involved in membrane traffic (YOP1/TB2/DP1/HVA22 family)	GO:0016021,integral component of membrane; GO:0009908,flower development; GO:0042538,hyperosmotic salinity response; GO:0010507,negative regulation of autophagy; GO:0009555,pollen development; GO:0009737,response to abscisic acid; GO:0009409,response to cold; GO:0009414,response to water deprivation	TB2/DP1, HVA22 family
BnaA01g14340D	9.79	6.91	8.4	1.21	2.15	1.18	2.573	7.56898e-13	up	--	BnaA01g14340D [Brassica napus]	RecName: Full=Protein TAPETUM DETERMINANT 1 {ECO:0000303|PubMed:14615601}; Flags: Precursor;	SubName: Full=BnaA01g14340D protein {ECO:0000313|EMBL:CDY34331.1};	--	GO:0048653,anther development; GO:0001709,cell fate determination	--
BnaA01g14450D	515.61	451.68	491.69	200.13	207.73	249.71	1.252	2.37244e-23	up	K04564 superoxide dismutase, Fe-Mn family [EC:1.15.1.1] | (RefSeq) superoxide dismutase [Fe] 1, chloroplastic-like (A)	BnaA01g14450D [Brassica napus]	RecName: Full=Superoxide dismutase [Fe] 1, chloroplastic; EC=1.15.1.1; AltName: Full=Protein FE SUPEROXIDE DISMUTASE 1; Flags: Precursor;	RecName: Full=Superoxide dismutase {ECO:0000256|RuleBase:RU000414}; EC=1.15.1.1 {ECO:0000256|RuleBase:RU000414};	Manganese superoxide dismutase	GO:0009507,chloroplast; GO:0009941,chloroplast envelope; GO:0031969,chloroplast membrane; GO:0009570,chloroplast stroma; GO:0005737,cytoplasm; GO:0005739,mitochondrion; GO:0005886,plasma membrane; GO:0009579,thylakoid; GO:0005507,copper ion binding; GO:0019904,protein domain specific binding; GO:0004784,superoxide dismutase activity; GO:0007623,circadian rhythm; GO:0046686,response to cadmium ion…	Iron/manganese superoxide dismutases, alpha-hairpin domain
BnaA01g14460D	0.66	1.02	0.64	2.77	4.02	2.12	-1.847	1.17646e-05	down	K22684 metacaspase-1 [EC:3.4.22.-] | (RefSeq) metacaspase-2-like (A)	BnaA01g14460D [Brassica napus]	RecName: Full=Metacaspase-2; Short=AtMC2; EC=3.4.22.-; AltName: Full=Metacaspase 1c; Short=AtMCP1c;	SubName: Full=BnaA01g14460D protein {ECO:0000313|EMBL:CDY34343.1};	Metacaspase involved in regulation of apoptosis	GO:0008234,cysteine-type peptidase activity; GO:0006952,defense response; GO:0043069,negative regulation of programmed cell death	LSD1 zinc finger
BnaA01g14470D	153.39	151.95	148.12	71.86	79.41	76.93	1.089	8.25492e-22	up	K07304 peptide-methionine (S)-S-oxide reductase [EC:1.8.4.11] | (RefSeq) peptide methionine sulfoxide reductase (A)	BnaA01g14470D [Brassica napus]	RecName: Full=Peptide methionine sulfoxide reductase; EC=1.8.4.11; AltName: Full=Peptide-methionine (S)-S-oxide reductase; Short=Peptide Met(O) reductase; AltName: Full=Protein-methionine-S-oxide reductase;	SubName: Full=BnaA01g14470D protein {ECO:0000313|EMBL:CDY34344.1};	Peptide methionine sulfoxide reductase	GO:0008113,peptide-methionine (S)-S-oxide reductase activity	Peptide methionine sulfoxide reductase
BnaA01g14640D	0.95	0.93	1.96	6.22	3.11	5.04	-1.799	8.85452e-05	down	K01051 pectinesterase [EC:3.1.1.11] | (RefSeq) pectinesterase-like (A)	pectinesterase inhibitor 7 [Brassica napus]	RecName: Full=Pectinesterase inhibitor 7 {ECO:0000305}; AltName: Full=Pectin methylesterase inhibitor 7 {ECO:0000303|PubMed:26183897}; Short=AtPMEI7 {ECO:0000303|PubMed:26183897}; Flags: Precursor;	SubName: Full=Uncharacterized protein {ECO:0000313|EnsemblPlants:Bo1g039970.1};	--	GO:0048046,apoplast; GO:0004857,enzyme inhibitor activity; GO:0009641,shade avoidance	Plant invertase/pectin methylesterase inhibitor
BnaA01g14720D	3.22	5.17	7.38	18.92	20.93	27.61	-2	8.48691e-13	down	K14826 FK506-binding nuclear protein [EC:5.2.1.8] | (RefSeq) peptidyl-prolyl cis-trans isomerase FKBP53 (A)	peptidyl-prolyl cis-trans isomerase FKBP53 [Brassica napus]	RecName: Full=Peptidyl-prolyl cis-trans isomerase FKBP53; Short=PPIase FKBP53; EC=5.2.1.8; AltName: Full=FK506-binding protein 53; Short=AtFKBP53; AltName: Full=Immunophilin FKBP53; AltName: Full=Rotamase;	RecName: Full=FK506-binding protein {ECO:0000256|PIRNR:PIRNR001473};	FKBP-type peptidyl-prolyl cis-trans isomerase	GO:0005829,cytosol; GO:0005730,nucleolus; GO:0005634,nucleus; GO:0005528,FK506 binding; GO:0042393,histone binding; GO:0003755,peptidyl-prolyl cis-trans isomerase activity; GO:0000412,histone peptidyl-prolyl isomerization; GO:0006334,nucleosome assembly	Nucleoplasmin-like domain
BnaA01g14860D	16.58	19.9	20.59	62.92	53.07	74.51	-1.637	6.22884e-25	down	K14563 rRNA 2'-O-methyltransferase fibrillarin [EC:2.1.1.-] | (RefSeq) mediator of RNA polymerase II transcription subunit 36a-like (A)	PREDICTED: mediator of RNA polymerase II transcription subunit 36a [Brassica rapa]	RecName: Full=Mediator of RNA polymerase II transcription subunit 36a; AltName: Full=Fibrillarin-like protein 2; AltName: Full=Histone-glutamine methyltransferase; AltName: Full=rRNA 2'-O-methyltransferase fibrillarin 2; EC=2.1.1.-;	SubName: Full=Uncharacterized protein {ECO:0000313|EnsemblPlants:Bra013905.1-P};	Fibrillarin and related nucleolar RNA-binding proteins	GO:0031428,box C/D snoRNP complex; GO:0015030,Cajal body; GO:0016592,mediator complex; GO:0005730,nucleolus; GO:0032040,small-subunit processome; GO:1990259,histone-glutamine methyltransferase activity; GO:0004540,ribonuclease activity; GO:0003723,RNA binding; GO:0008649,rRNA methyltransferase activity; GO:0030515,snoRNA binding; GO:0000494,box C/D snoRNA 3'-end processing; GO:1990258,histone glu…	tRNA methyltransferase complex GCD14 subunit
BnaA01g14870D	13.09	10.67	8.98	4.02	3.09	2.41	1.891	3.66902e-13	up	K03327 multidrug resistance protein, MATE family | (RefSeq) protein DETOXIFICATION 35-like (A)	PREDICTED: protein DETOXIFICATION 35-like [Brassica rapa]	RecName: Full=Protein DETOXIFICATION 35 {ECO:0000303|PubMed:11739388}; Short=AtDTX35 {ECO:0000303|PubMed:11739388}; AltName: Full=Multidrug and toxic compound extrusion protein 35 {ECO:0000305}; Short=MATE protein 35 {ECO:0000305}; AltName: Full=Protein DETOXIFYING EFFLUX CARRIER 35 {ECO:0000303|PubMed:19995827}; Short=Protein DTX5 {ECO:0000303|PubMed:19995827}; AltName: Full=Protein FLOWER FLAVO…	RecName: Full=Protein DETOXIFICATION {ECO:0000256|RuleBase:RU004914}; AltName: Full=Multidrug and toxic compound extrusion protein {ECO:0000256|RuleBase:RU004914};	Uncharacterized membrane protein, predicted efflux pump	GO:0016021,integral component of membrane; GO:0005774,vacuolar membrane; GO:0005773,vacuole; GO:0015297,antiporter activity; GO:0015238,drug transmembrane transporter activity; GO:0009813,flavonoid biosynthetic process	Polysaccharide biosynthesis C-terminal domain
BnaA01g14880D	72.98	65.34	56.6	31.64	35.84	33.07	1.054	3.84596e-12	up	K13071 pheophorbide a oxygenase [EC:1.14.15.17] | (RefSeq) pheophorbide a oxygenase, chloroplastic (A)	PREDICTED: protochlorophyllide-dependent translocon component 52, chloroplastic [Brassica rapa]	RecName: Full=Protochlorophyllide-dependent translocon component 52, chloroplastic; AltName: Full=ACD1-like protein; AltName: Full=Protein TIC 55-IV; AltName: Full=Translocon at the inner envelope membrane of chloroplasts 55-IV; Flags: Precursor;	SubName: Full=Uncharacterized protein {ECO:0000313|EnsemblPlants:Bra013907.1-P};	--	GO:0009507,chloroplast; GO:0009941,chloroplast envelope; GO:0009706,chloroplast inner membrane; GO:0016021,integral component of membrane; GO:0009536,plastid; GO:0051537,2 iron, 2 sulfur cluster binding; GO:0010277,chlorophyllide a oxygenase [overall] activity; GO:0046872,metal ion binding; GO:0015031,protein transport	Rieske [2Fe-2S] domain
BnaA01g14940D	24.77	18.98	18.28	3.55	5.11	5.2	2.259	1.67037e-21	up	K15746 beta-carotene 3-hydroxylase [EC:1.14.15.24] | (RefSeq) beta-carotene 3-hydroxylase 1, chloroplastic-like (A)	PREDICTED: beta-carotene 3-hydroxylase 1, chloroplastic [Brassica rapa]	RecName: Full=Beta-carotene 3-hydroxylase 1, chloroplastic; Short=AtB1; EC=1.14.15.24 {ECO:0000269|PubMed:8798688}; Flags: Precursor;	SubName: Full=Chloroplast beta-carotene hydroxylase {ECO:0000313|EMBL:AGL08131.1}; EC=1.14.13.129 {ECO:0000313|EMBL:AGL08131.1};	--	GO:0031969,chloroplast membrane; GO:0016021,integral component of membrane; GO:0016787,hydrolase activity; GO:0005506,iron ion binding; GO:0016491,oxidoreductase activity; GO:0016123,xanthophyll biosynthetic process	Fatty acid hydroxylase superfamily
BnaA01g14950D	4.9	4.3	2.81	17.11	12.79	19.02	-1.92	2.26619e-13	down	K22757 glutaminyl-peptide cyclotransferase [EC:2.3.2.5] | (RefSeq) glutaminyl-peptide cyclotransferase-like isoform X1 (A)	glutaminyl-peptide cyclotransferase-like isoform X1 [Brassica napus]	RecName: Full=Glutaminyl-peptide cyclotransferase; EC=2.3.2.5; AltName: Full=Glutaminyl cyclase;	SubName: Full=Uncharacterized protein {ECO:0000313|EnsemblPlants:Bra013913.1-P};	--	GO:0005789,endoplasmic reticulum membrane; GO:0016021,integral component of membrane; GO:0005886,plasma membrane; GO:0016603,glutaminyl-peptide cyclotransferase activity; GO:0017186,peptidyl-pyroglutamic acid biosynthetic process, using glutaminyl-peptide cyclotransferase	SMP-30/Gluconolactonase/LRE-like region
BnaA01g15000D	5.65	3.51	11.38	2.52	1.74	2.29	1.751	7.40346e-05	up	K08235 xyloglucan:xyloglucosyl transferase [EC:2.4.1.207] | (RefSeq) probable xyloglucan endotransglucosylase/hydrolase protein 23 (A)	PREDICTED: probable xyloglucan endotransglucosylase/hydrolase protein 23 [Brassica rapa]	RecName: Full=Probable xyloglucan endotransglucosylase/hydrolase protein 23; Short=At-XTH23; Short=XTH-23; EC=2.4.1.207; Flags: Precursor;	RecName: Full=Xyloglucan endotransglucosylase/hydrolase {ECO:0000256|RuleBase:RU361120}; EC=2.4.1.207 {ECO:0000256|RuleBase:RU361120};	--	GO:0048046,apoplast; GO:0005618,cell wall; GO:0005794,Golgi apparatus; GO:0004553,hydrolase activity, hydrolyzing O-glycosyl compounds; GO:0016762,xyloglucan:xyloglucosyl transferase activity; GO:0042546,cell wall biogenesis; GO:0071555,cell wall organization; GO:0010411,xyloglucan metabolic process	Xyloglucan endo-transglycosylase (XET) C-terminus
BnaA01g15010D	19.61	21.75	18.95	7.38	11.87	8.88	1.194	4.53266e-07	up	K20855 beta-1,3-galactosyltransferase 1/2/3/4/5/7/8 [EC:2.4.1.-] | (RefSeq) probable beta-1,3-galactosyltransferase 4 isoform X1 (A)	PREDICTED: CASP-like protein 2C1 [Brassica rapa]	RecName: Full=CASP-like protein 2C1; Short=AlCASPL2C1;	RecName: Full=CASP-like protein {ECO:0000256|RuleBase:RU361233};	--	GO:0016021,integral component of membrane; GO:0005886,plasma membrane	Domain of unknown function (DUF588)
BnaA01g15080D	14.38	11.45	23.09	73.34	69.97	69.56	-2.024	3.22165e-18	down	K01792 glucose-6-phosphate 1-epimerase [EC:5.1.3.15] | (RefSeq) putative glucose-6-phosphate 1-epimerase (A)	PREDICTED: putative glucose-6-phosphate 1-epimerase [Brassica rapa]	RecName: Full=Putative glucose-6-phosphate 1-epimerase {ECO:0000250|UniProtKB:Q03161}; EC=5.1.3.15 {ECO:0000250|UniProtKB:Q03161}; AltName: Full=Putative D-hexose-6-phosphate mutarotase {ECO:0000250|UniProtKB:Q03161}; AltName: Full=Putative apospory-associated protein C;	RecName: Full=Glucose-6-phosphate 1-epimerase {ECO:0000256|PIRNR:PIRNR016020}; EC=5.1.3.15 {ECO:0000256|PIRNR:PIRNR016020};	Uncharacterized enzymes related to aldose 1-epimerase	GO:0030246,carbohydrate binding; GO:0047938,glucose-6-phosphate 1-epimerase activity; GO:0005975,carbohydrate metabolic process	Aldose 1-epimerase
BnaA01g15110D	0.82	0.86	0.72	7.72	5.32	8.46	-3.053	3.47521e-27	down	K20044 phosphatidylinositol-binding clathrin assembly protein | (RefSeq) putative clathrin assembly protein At4g25940 (A)	putative clathrin assembly protein At4g25940 isoform X2 [Brassica napus]	RecName: Full=Putative clathrin assembly protein At4g25940;	SubName: Full=Uncharacterized protein {ECO:0000313|EnsemblPlants:Bo1g040670.1};	Clathrin assembly protein AP180 and related proteins, contain ENTH domain	GO:0005905,clathrin-coated pit; GO:0030136,clathrin-coated vesicle; GO:0005794,Golgi apparatus; GO:0005545,1-phosphatidylinositol binding; GO:0030276,clathrin binding; GO:0048268,clathrin coat assembly; GO:0006897,endocytosis	ENTH domain
BnaA01g15250D	64.17	52.94	37.91	19.88	20.12	21.25	1.443	6.63116e-13	up	K14497 protein phosphatase 2C [EC:3.1.3.16] | (RefSeq) protein phosphatase 2C 56 (A)	protein phosphatase 2C 56 [Brassica napus]	RecName: Full=Protein phosphatase 2C 56; Short=AtPP2C56; EC=3.1.3.16; AltName: Full=Protein ABSCISIC ACID-INSENSITIVE 1; AltName: Full=Protein phosphatase 2C ABI1; Short=PP2C ABI1;	SubName: Full=Protein phosphatase type 2c {ECO:0000313|EMBL:ATZ76612.1};	Serine/threonine protein phosphatase	GO:0005737,cytoplasm; GO:0005634,nucleus; GO:0005886,plasma membrane; GO:0046872,metal ion binding; GO:0004721,phosphoprotein phosphatase activity; GO:0019901,protein kinase binding; GO:0004722,protein serine/threonine phosphatase activity; GO:0009738,abscisic acid-activated signaling pathway; GO:0009788,negative regulation of abscisic acid-activated signaling pathway; GO:0006470,protein dephosph…	Stage II sporulation protein E (SpoIIE)
BnaA01g15300D	12.66	14.72	16.24	32.91	30.91	40.9	-1.162	8.79116e-13	down	K11279 nucleosome assembly protein 1-like 1 | (RefSeq) nucleosome assembly protein 1;1 (A)	nucleosome assembly protein 1;1 [Brassica napus]	RecName: Full=Nucleosome assembly protein 1;1; Short=AtNAP1;1; AltName: Full=Nucleosome/chromatin assembly factor group A1; Flags: Precursor;	SubName: Full=Uncharacterized protein {ECO:0000313|EnsemblPlants:Bra013951.1-P};	Nucleosome assembly protein NAP-1	GO:0005737,cytoplasm; GO:0005829,cytosol; GO:0005634,nucleus; GO:0005886,plasma membrane; GO:0042393,histone binding; GO:0030154,cell differentiation; GO:0008283,cell proliferation; GO:0000724,double-strand break repair via homologous recombination; GO:0006334,nucleosome assembly; GO:0016444,somatic cell DNA recombination	Nucleosome assembly protein (NAP)
BnaA01g15720D	1.39	1.5	1.3	5.58	4.38	5.4	-1.773	1.01386e-13	down	K14835 25S rRNA (cytosine2870-C5)-methyltransferase [EC:2.1.1.310] | (RefSeq) 25S rRNA (cytosine-C(5))-methyltransferase nop2-like (A)	25S rRNA (cytosine-C(5))-methyltransferase nop2-like [Brassica napus]	--	SubName: Full=Uncharacterized protein {ECO:0000313|EnsemblPlants:Bra026418.1-P};	tRNA and rRNA cytosine-C5-methylase (nucleolar protein NOL1/NOP2)	--	FtsJ-like methyltransferase
BnaA01g15810D	16.46	32.28	26.49	53.18	72.54	49.78	-1.135	5.17334e-06	down	K01126 glycerophosphoryl diester phosphodiesterase [EC:3.1.4.46] | (RefSeq) glycerophosphodiester phosphodiesterase GDPDL3-like (A)	PREDICTED: glycerophosphodiester phosphodiesterase GDPDL3 [Brassica rapa]	RecName: Full=Glycerophosphodiester phosphodiesterase GDPDL3 {ECO:0000305}; EC=3.1.4.46 {ECO:0000250|UniProtKB:Q7Y208}; AltName: Full=Glycerophosphodiester phosphodiesterase-like 3 {ECO:0000303|PubMed:21323773}; Short=ATGDPDL3 {ECO:0000303|PubMed:21323773}; AltName: Full=Glycerophosphodiesterase-like 2 {ECO:0000303|PubMed:18718934}; AltName: Full=Protein MUTANT ROOT HAIR 5 {ECO:0000303|PubMed:163…	SubName: Full=Uncharacterized protein {ECO:0000313|EnsemblPlants:Bra026409.1-P};	Glycerophosphoryl diester phosphodiesterase	GO:0031225,anchored component of membrane; GO:0046658,anchored component of plasma membrane; GO:0009505,plant-type cell wall; GO:0005886,plasma membrane; GO:0008889,glycerophosphodiester phosphodiesterase activity; GO:0009932,cell tip growth; GO:0006071,glycerol metabolic process; GO:0010442,guard cell morphogenesis; GO:0006629,lipid metabolic process; GO:0052541,plant-type cell wall cellulose me…	Glycerophosphoryl diester phosphodiesterase family
BnaA01g15820D	4.08	2.94	4.33	0.44	0.66	0.4	3.029	4.74958e-20	up	K17275 plastin-1 | (RefSeq) fimbrin-1 (A)	PREDICTED: fimbrin-1 isoform X1 [Brassica rapa]	RecName: Full=Fimbrin-1 {ECO:0000303|PubMed:11123801}; Short=AtFIM1; AltName: Full=Fimbrin1 {ECO:0000305};	RecName: Full=Serine/threonine-protein phosphatase {ECO:0000256|RuleBase:RU004273}; EC=3.1.3.16 {ECO:0000256|RuleBase:RU004273};	Ca2+-binding actin-bundling protein (fimbrin/plastin), EF-Hand protein superfamily	GO:0005884,actin filament; GO:0032432,actin filament bundle; GO:0005737,cytoplasm; GO:0051015,actin filament binding; GO:0046872,metal ion binding; GO:0051764,actin crosslink formation; GO:0051017,actin filament bundle assembly; GO:0051639,actin filament network formation; GO:0007623,circadian rhythm	EF-hand domain pair
BnaA01g15900D	4.49	3.48	4.44	10.71	8.02	11.93	-1.202	7.09254e-07	down	K03687 molecular chaperone GrpE | (RefSeq) uncharacterized protein LOC106445058 (A)	uncharacterized protein LOC106445058 [Brassica napus]	RecName: Full=GrpE protein homolog 2, mitochondrial {ECO:0000303|PubMed:22128139}; Flags: Precursor;	RecName: Full=GrpE protein homolog {ECO:0000256|RuleBase:RU000640};	Molecular chaperone of the GrpE family	GO:0005759,mitochondrial matrix; GO:0005739,mitochondrion; GO:0001405,PAM complex, Tim23 associated import motor; GO:0000774,adenyl-nucleotide exchange factor activity; GO:0005524,ATP binding; GO:0051087,chaperone binding; GO:0005507,copper ion binding; GO:0042803,protein homodimerization activity; GO:0051082,unfolded protein binding; GO:0010286,heat acclimation; GO:0006457,protein folding; GO:00…	Nuclear pore complex interacting protein (NPIP)
BnaA01g15950D	128.34	105.12	110.67	57.3	35.32	44.6	1.434	7.42544e-16	up	K14190 GDP-L-galactose phosphorylase [EC:2.7.7.69] | (RefSeq) GDP-L-galactose phosphorylase 1 (A)	PREDICTED: GDP-L-galactose phosphorylase 1 [Brassica rapa]	RecName: Full=GDP-L-galactose phosphorylase 1; EC=2.7.7.69; AltName: Full=Protein VITAMIN C DEFECTIVE 2;	SubName: Full=GDP-L-galactose phosphorylase {ECO:0000313|EMBL:AET14214.1};	Predicted hydrolase (HIT family)	GO:0005737,cytoplasm; GO:0005634,nucleus; GO:0010475,galactose-1-phosphate guanylyltransferase (GDP) activity; GO:0080048,GDP-D-glucose phosphorylase activity; GO:0010472,GDP-galactose:glucose-1-phosphate guanylyltransferase activity; GO:0010471,GDP-galactose:mannose-1-phosphate guanylyltransferase activity; GO:0010473,GDP-galactose:myoinositol-1-phosphate guanylyltransferase activity; GO:0080047…	Domain of unknown function (DUF4922)
BnaA01g15960D	7.6	9.19	7.37	2.78	3.52	2.76	1.514	2.11141e-07	up	K06997 PLP dependent protein | (RefSeq) pyridoxal phosphate homeostasis protein-like (A)	pyridoxal phosphate homeostasis protein-like [Brassica napus]	--	RecName: Full=Pyridoxal phosphate homeostasis protein {ECO:0000256|HAMAP-Rule:MF_03225}; Short=PLP homeostasis protein {ECO:0000256|HAMAP-Rule:MF_03225};	Proline synthetase co-transcribed protein	--	Alanine racemase, N-terminal domain
BnaA01g16330D	6.19	8.59	6.7	28.58	23.66	30.07	-1.836	4.16162e-25	down	K04733 interleukin-1 receptor-associated kinase 4 [EC:2.7.11.1] | (RefSeq) G-type lectin S-receptor-like serine/threonine-protein kinase At4g27290 (A)	G-type lectin S-receptor-like serine/threonine-protein kinase SD1-1 [Brassica napus]	RecName: Full=G-type lectin S-receptor-like serine/threonine-protein kinase SD1-1; EC=2.7.11.1; AltName: Full=S-domain-1 (SD1) receptor kinase 1; Short=SD1-1; Flags: Precursor;	SubName: Full=BnaC01g19470D protein {ECO:0000313|EMBL:CDY29295.1};	--	GO:0016021,integral component of membrane; GO:0005886,plasma membrane; GO:0009506,plasmodesma; GO:0005524,ATP binding; GO:0005516,calmodulin binding; GO:0030246,carbohydrate binding; GO:0004674,protein serine/threonine kinase activity; GO:0031625,ubiquitin protein ligase binding; GO:0006468,protein phosphorylation; GO:0048544,recognition of pollen	Phosphotransferase enzyme family
BnaA01g16380D	21.56	9.95	9.67	0	0.43	0.16	6.25	5.20796e-17	up	K10418 dynein light chain LC8-type | (RefSeq) dynein light chain 2, cytoplasmic-like (A)	PREDICTED: dynein light chain 2, cytoplasmic [Brassica rapa]	RecName: Full=Dynein 8 kDa light chain, flagellar outer arm;	SubName: Full=Uncharacterized protein {ECO:0000313|EnsemblPlants:Bra026356.1-P};	Dynein light chain type 1	GO:0005930,axoneme; GO:0097014,ciliary plasm; GO:0030286,dynein complex; GO:0005874,microtubule; GO:0031514,motile cilium; GO:0003774,motor activity; GO:0007017,microtubule-based process; GO:0044458,motile cilium assembly	Dynein light chain type 1
BnaA01g16400D	2.97	2.75	3.86	1.15	0.95	0.52	1.986	8.95872e-07	up	K00521 ferric-chelate reductase [EC:1.16.1.7] | (RefSeq) ferric reduction oxidase 7, chloroplastic-like (A)	NAC domain-containing protein 72-like [Brassica napus]	RecName: Full=NAC domain-containing protein 72; Short=ANAC072; AltName: Full=Protein RESPONSIVE TO DESICCATION 26;	SubName: Full=Uncharacterized protein {ECO:0000313|EnsemblPlants:Bra026353.1-P};	--	GO:0005634,nucleus; GO:0003677,DNA binding; GO:0006355,regulation of transcription, DNA-templated; GO:0006351,transcription, DNA-templated	No apical meristem (NAM) protein
BnaA01g16490D	1.19	2.35	2.15	6.49	4.36	7.06	-1.553	1.76758e-05	down	K12587 exosome complex component MTR3 | (RefSeq) exosome complex component RRP41-like (A)	PREDICTED: exosome complex component RRP41-like [Brassica rapa]	RecName: Full=Exosome complex component RRP41-like {ECO:0000305}; AltName: Full=Protein SLOWER GROWTH {ECO:0000303|PubMed:23132787}; AltName: Full=Ribosomal RNA-processing protein 41-like {ECO:0000305};	SubName: Full=Uncharacterized protein {ECO:0000313|EnsemblPlants:Bra026344.1-P};	--	GO:0005737,cytoplasm; GO:0000177,cytoplasmic exosome (RNase complex); GO:0000176,nuclear exosome (RNase complex); GO:0005730,nucleolus; GO:0005634,nucleus; GO:0008408,3'-5' exonuclease activity; GO:0003723,RNA binding; GO:0071028,nuclear mRNA surveillance; GO:0034427,nuclear-transcribed mRNA catabolic process, exonucleolytic, 3'-5'; GO:0071051,polyadenylation-dependent snoRNA 3'-end processing; G…	3' exoribonuclease family, domain 2
BnaA01g16530D	40.88	39.47	47.22	13.26	13.03	12.98	1.8	9.75914e-35	up	K03006 DNA-directed RNA polymerase II subunit RPB1 [EC:2.7.7.6] | (RefSeq) early nodulin-like protein 2 (A)	PREDICTED: early nodulin-like protein 2 [Brassica oleracea var. oleracea]	RecName: Full=Early nodulin-like protein 2; AltName: Full=Phytocyanin-like protein; Flags: Precursor;	SubName: Full=Uncharacterized protein {ECO:0000313|EnsemblPlants:Bo1g049450.1};	--	GO:0031225,anchored component of membrane; GO:0046658,anchored component of plasma membrane; GO:0048046,apoplast; GO:0009507,chloroplast; GO:0005886,plasma membrane; GO:0005773,vacuole; GO:0009055,electron transfer activity	Plastocyanin-like domain
BnaA01g16620D	2.03	1.82	1.25	4.42	3.35	5.5	-1.273	0.00451748	down	--	protein yippee-like At4g27740 [Brassica napus]	RecName: Full=Protein yippee-like At4g27740;	RecName: Full=Protein yippee-like {ECO:0000256|RuleBase:RU110713};	Predicted Yippee-type zinc-binding protein	GO:0046872,metal ion binding	Glutathione-dependent formaldehyde-activating enzyme
BnaA01g16750D	2.75	1.83	2.25	1.09	1.2	0.79	1.258	0.000522644	up	K15119 solute carrier family 25, member 39/40 | (RefSeq) mitochondrial carrier protein MTM1 (A)	PREDICTED: mitochondrial carrier protein MTM1 [Brassica rapa]	RecName: Full=Mitochondrial carrier protein MTM1; AltName: Full=Manganese tracking factor for mitochondrial SOD2;	SubName: Full=Uncharacterized protein {ECO:0000313|EnsemblPlants:Bra026298.1-P};	Mitochondrial carrier protein CGI-69	GO:0016021,integral component of membrane; GO:0005743,mitochondrial inner membrane; GO:0005739,mitochondrion; GO:0016530,metallochaperone activity; GO:0022857,transmembrane transporter activity; GO:0005215,transporter activity; GO:0006828,manganese ion transport; GO:0006839,mitochondrial transport; GO:1901562,response to paraquat	Mitochondrial carrier protein
BnaA01g16970D	1.22	1.95	3.55	5.61	5.79	5.29	-1.218	0.00273695	down	--	PREDICTED: protein ULTRAPETALA 1 [Brassica rapa]	RecName: Full=Protein ULTRAPETALA 1;	SubName: Full=Uncharacterized protein {ECO:0000313|EnsemblPlants:Bra026276.1-P};	--	GO:0005737,cytoplasm; GO:0005634,nucleus; GO:0003677,DNA binding; GO:0007275,multicellular organism development; GO:0009910,negative regulation of flower development; GO:0006355,regulation of transcription, DNA-templated; GO:0006351,transcription, DNA-templated	SAND domain
BnaA01g17010D	9.06	10.02	5.31	39.84	23.31	37.2	-1.931	4.60143e-12	down	--	PREDICTED: uncharacterized protein LOC103867927 [Brassica rapa]	--	SubName: Full=Uncharacterized protein {ECO:0000313|EnsemblPlants:Bo1g051300.1};	--	--	Wound-induced protein
BnaA01g17040D	9.15	8.71	6.99	2.85	2.6	4.11	1.472	3.51179e-05	up	--	uncharacterized protein LOC106452836 [Brassica napus]	--	SubName: Full=Uncharacterized protein {ECO:0000313|EnsemblPlants:Bo1g051370.1};	--	--	--
BnaA01g17540D	0.25	0	0	9.97	9.47	14.33	-6.976	1.58458e-22	down	K19891 glucan endo-1,3-beta-glucosidase 1/2/3 [EC:3.2.1.39] | (RefSeq) glucan endo-1,3-beta-glucosidase 2-like (A)	BnaA01g17540D [Brassica napus]	RecName: Full=Probable glucan endo-1,3-beta-glucosidase At4g16260 {ECO:0000305}; EC=3.2.1.39 {ECO:0000305}; Flags: Precursor;	SubName: Full=BnaA01g17540D protein {ECO:0000313|EMBL:CDY32230.1};	--	GO:0046658,anchored component of plasma membrane; GO:0005618,cell wall; GO:0005576,extracellular region; GO:0005774,vacuolar membrane; GO:0042973,glucan endo-1,3-beta-D-glucosidase activity; GO:0004553,hydrolase activity, hydrolyzing O-glycosyl compounds; GO:0030247,polysaccharide binding; GO:0005975,carbohydrate metabolic process; GO:0009817,defense response to fungus, incompatible interaction; …	Glycosyl hydrolases family 17
BnaA01g17550D	16.94	17.17	16.82	10.04	8.86	8.13	1.016	2.92516e-12	up	K05677 ATP-binding cassette, subfamily D (ALD), member 3 | (RefSeq) ATP-binding cassette, sub-family D (ALD), member 3 (A)	ABC transporter D family member 2, chloroplastic [Brassica napus]	RecName: Full=ABC transporter D family member 2, chloroplastic; Short=ABC transporter ABCD.2; Short=AtABCD2; EC=3.6.3.-; Flags: Precursor;	SubName: Full=BnaA01g17550D protein {ECO:0000313|EMBL:CDY32229.1};	Long-chain acyl-CoA transporter, ABC superfamily (involved in peroxisome organization and biogenesis)	GO:0009507,chloroplast; GO:0016021,integral component of membrane; GO:0005524,ATP binding; GO:0042626,ATPase activity, coupled to transmembrane movement of substances	AAA domain
BnaA01g17570D	371.03	361.59	182.4	172.75	105.26	80.48	1.457	1.78017e-06	up	K01373 cathepsin F [EC:3.4.22.41] | (RefSeq) probable cysteine protease RD19C (A)	PREDICTED: probable cysteine protease RD19C [Brassica rapa]	RecName: Full=Probable cysteine protease RD19C {ECO:0000305}; EC=3.4.22.- {ECO:0000305}; AltName: Full=RD19-like protein 2 {ECO:0000303|PubMed:18708476}; Flags: Precursor;	SubName: Full=Uncharacterized protein {ECO:0000313|EnsemblPlants:Bra033545.1-P};	Cysteine proteinase Cathepsin F	GO:0005615,extracellular space; GO:0005764,lysosome; GO:0000323,lytic vacuole; GO:0005773,vacuole; GO:0004197,cysteine-type endopeptidase activity; GO:0051603,proteolysis involved in cellular protein catabolic process	Peptidase C1-like family
BnaA01g17720D	11.35	11.47	14.35	38.73	41.17	26.08	-1.419	9.05263e-12	down	K12446 L-arabinokinase [EC:2.7.1.46] | (RefSeq) L-arabinokinase (A)	L-arabinokinase [Brassica napus]	RecName: Full=L-arabinokinase; Short=AtISA1; EC=2.7.1.46;	SubName: Full=BnaC01g22060D protein {ECO:0000313|EMBL:CDY34427.1};	Galactokinase	GO:0005829,cytosol; GO:0016021,integral component of membrane; GO:0009506,plasmodesma; GO:0005524,ATP binding; GO:0005534,galactose binding; GO:0009702,L-arabinokinase activity	Glycosyltransferase Family 4
BnaA01g17830D	0.7	0.11	0	2.42	2.46	1.15	-2.79	0.00301188	down	K19801 phosphatidylinositol 4-kinase B [EC:2.7.1.67] | (RefSeq) phosphatidylinositol 4-kinase beta-like protein (A)	BnaA01g17830D [Brassica napus]	RecName: Full=Phosphatidylinositol 4-kinase beta 2; Short=PI4-kinase beta 2; Short=PtdIns-4-kinase beta 2; EC=2.7.1.67; AltName: Full=Phosphatidylinositol 4-OH kinase beta2; Short=AtPI4Kbeta2; Short=PI-4Kbeta2;	SubName: Full=BnaA01g17830D protein {ECO:0000313|EMBL:CDY42971.1};	Phosphatidylinositol 4-kinase, involved in intracellular trafficking and secretion	GO:0005737,cytoplasm; GO:0030659,cytoplasmic vesicle membrane; GO:0005794,Golgi apparatus; GO:0016020,membrane; GO:0005886,plasma membrane; GO:0004430,1-phosphatidylinositol 4-kinase activity; GO:0048015,phosphatidylinositol-mediated signaling; GO:0009860,pollen tube growth; GO:0048768,root hair cell tip growth	--
BnaA01g17940D	31.5	18.54	20.96	3.31	2.08	2.44	3.29	6.12963e-40	up	K01177 beta-amylase [EC:3.2.1.2] | (RefSeq) beta-amylase 3, chloroplastic-like (A)	beta-amylase 3, chloroplastic-like [Brassica napus]	RecName: Full=Beta-amylase 3, chloroplastic; EC=3.2.1.2; AltName: Full=1,4-alpha-D-glucan maltohydrolase; AltName: Full=Beta-amylase 8; AltName: Full=Chloroplast beta-amylase; Short=CT-BMY; Flags: Precursor;	RecName: Full=Beta-amylase {ECO:0000256|RuleBase:RU000509}; EC=3.2.1.2 {ECO:0000256|RuleBase:RU000509};	--	GO:0009570,chloroplast stroma; GO:0102229,amylopectin maltohydrolase activity; GO:0016161,beta-amylase activity; GO:0000024,maltose biosynthetic process; GO:0009409,response to cold; GO:0005983,starch catabolic process	Glycosyl hydrolase family 14
BnaA01g18000D	14.97	10.98	11.68	1.68	1.8	1.65	2.978	4.85732e-24	up	K20628 expansin | (RefSeq) LOC109772016; expansin-B11-like (A)	expansin-like B1 isoform X2 [Brassica napus]	RecName: Full=Expansin-like B1; Short=At-EXPR1; Short=AtEXLB1; Short=AtEXPR1; AltName: Full=Ath-ExpBeta-3.1; Flags: Precursor;	SubName: Full=BnaA01g18000D protein {ECO:0000313|EMBL:CDY42954.1};	--	GO:0005576,extracellular region; GO:0019953,sexual reproduction	Lytic transglycolase
BnaA01g18050D	34.87	39.68	43.41	14.2	15.6	9.86	1.671	8.28628e-14	up	--	--	--	--	--	--	--
BnaA01g18170D	2.65	1.51	2.84	0.28	0.84	0.82	1.932	0.00153033	up	K09286 EREBP-like factor | (RefSeq) ethylene-responsive transcription factor TINY-like (A)	BnaA01g18170D [Brassica napus]	RecName: Full=Ethylene-responsive transcription factor ERF039;	SubName: Full=BnaA01g18170D protein {ECO:0000313|EMBL:CDY42937.1};	--	GO:0005634,nucleus; GO:0003677,DNA binding; GO:0003700,DNA-binding transcription factor activity; GO:0009873,ethylene-activated signaling pathway; GO:0006351,transcription, DNA-templated	AP2 domain
BnaA01g18180D	7.37	9.2	7.91	17.81	21.41	17.16	-1.109	1.98802e-09	down	K13065 shikimate O-hydroxycinnamoyltransferase [EC:2.3.1.133] | (RefSeq) shikimate O-hydroxycinnamoyltransferase-like (A)	BnaA01g18180D [Brassica napus]	RecName: Full=Shikimate O-hydroxycinnamoyltransferase; EC=2.3.1.133; AltName: Full=Hydroxycinnamoyl transferase; AltName: Full=Hydroxycinnamoyl-Coenzyme A shikimate/quinate hydroxycinnamoyltransferase;	SubName: Full=BnaA01g18180D protein {ECO:0000313|EMBL:CDY22880.1};	--	GO:0005737,cytoplasm; GO:0005829,cytosol; GO:0016020,membrane; GO:0047205,quinate O-hydroxycinnamoyltransferase activity; GO:0047172,shikimate O-hydroxycinnamoyltransferase activity; GO:0010252,auxin homeostasis; GO:0071555,cell wall organization; GO:0009809,lignin biosynthetic process; GO:0009963,positive regulation of flavonoid biosynthetic process	Transferase family
BnaA01g18270D	2.15	1.76	0.94	0.86	0.91	0.44	1.235	0.0135211	up	--	PREDICTED: late embryogenesis abundant protein Lea5 isoform X1 [Brassica rapa]	RecName: Full=Late embryogenis abundant protein 41 {ECO:0000303|PubMed:25005920}; AltName: Full=Protein DROUGHT-INDUCED 21 {ECO:0000303|PubMed:7823904}; Short=AtDI21 {ECO:0000303|PubMed:7823904}; Flags: Precursor;	SubName: Full=Uncharacterized protein {ECO:0000313|EnsemblPlants:Bra033520.1-P};	--	GO:0005739,mitochondrion; GO:0009631,cold acclimation; GO:0009737,response to abscisic acid; GO:0009409,response to cold; GO:0009414,response to water deprivation	Late embryogenesis abundant protein
BnaA01g18390D	9.14	11.62	16.16	34.81	26.52	40.22	-1.357	2.91678e-08	down	K07565 60S ribosome subunit biogenesis protein NIP7 | (RefSeq) 60S ribosome subunit biogenesis protein NIP7 homolog (A)	60S ribosome subunit biogenesis protein NIP7 homolog [Brassica napus]	--	RecName: Full=60S ribosome subunit biogenesis protein NIP7 homolog {ECO:0000256|PIRNR:PIRNR017190};	Ribosome biogenesis protein NIP7	--	UPF0113 PUA domain
BnaA01g18440D	27.96	19.9	17.07	7.93	5.42	6.12	1.847	2.66701e-09	up	K01006 pyruvate, orthophosphate dikinase [EC:2.7.9.1] | (RefSeq) pyruvate, phosphate dikinase 1, chloroplastic-like isoform X1 (A)	BnaA01g18440D [Brassica napus]	RecName: Full=Pyruvate, phosphate dikinase 1, chloroplastic; EC=2.7.9.1; AltName: Full=Pyruvate, orthophosphate dikinase 1; Flags: Precursor;	SubName: Full=BnaA01g18440D protein {ECO:0000313|EMBL:CDY22906.1};	--	GO:0009507,chloroplast; GO:0009570,chloroplast stroma; GO:0005829,cytosol; GO:0005634,nucleus; GO:0005524,ATP binding; GO:0016301,kinase activity; GO:0046872,metal ion binding; GO:0050242,pyruvate, phosphate dikinase activity; GO:0015979,photosynthesis; GO:0006090,pyruvate metabolic process	--
BnaA01g18450D	30.2	23.33	18.41	8.18	5.48	6.39	1.951	1.95096e-18	up	K01006 pyruvate, orthophosphate dikinase [EC:2.7.9.1] | (RefSeq) pyruvate, phosphate dikinase 1, chloroplastic (A)	BnaA01g18450D [Brassica napus]	RecName: Full=Pyruvate, phosphate dikinase 1, chloroplastic; EC=2.7.9.1; AltName: Full=Pyruvate, orthophosphate dikinase 1; Flags: Precursor;	RecName: Full=Pyruvate, phosphate dikinase {ECO:0000256|PIRNR:PIRNR000853}; EC=2.7.9.1 {ECO:0000256|PIRNR:PIRNR000853};	--	GO:0009507,chloroplast; GO:0009570,chloroplast stroma; GO:0005829,cytosol; GO:0005634,nucleus; GO:0005524,ATP binding; GO:0016301,kinase activity; GO:0046872,metal ion binding; GO:0050242,pyruvate, phosphate dikinase activity; GO:0015979,photosynthesis; GO:0006090,pyruvate metabolic process	PEP-utilising enzyme, mobile domain
BnaA01g18480D	2.67	3	3.31	10.1	7.46	10.46	-1.539	3.49432e-16	down	K14556 U3 small nucleolar RNA-associated protein 12 | (RefSeq) WD repeat-containing protein 3-like (A)	BnaA01g18480D [Brassica napus]	RecName: Full=Dynein assembly factor with WDR repeat domains 1; AltName: Full=Outer row dynein assembly protein 16;	SubName: Full=BnaA01g18480D protein {ECO:0000313|EMBL:CDY22910.1};	WD40-repeat-containing subunit of the 18S rRNA processing complex	GO:0005737,cytoplasm; GO:0005856,cytoskeleton; GO:0031514,motile cilium	Ciliary BBSome complex subunit 2, middle region
BnaA01g18530D	4.98	4.85	3.64	0.81	1.57	0.51	2.318	5.82308e-08	up	K13068 sinapate 1-glucosyltransferase [EC:2.4.1.120] | (RefSeq) UDP-glycosyltransferase 84A2 (A)	UDP-glycosyltransferase 84A3-like [Brassica napus]	RecName: Full=UDP-glycosyltransferase 84A3; EC=2.4.1.-; AltName: Full=Hydroxycinnamate glucosyltransferase 3; Short=AtHCAGT3; EC=2.4.1.126;	RecName: Full=Glycosyltransferase {ECO:0000256|RuleBase:RU362057}; EC=2.4.1.- {ECO:0000256|RuleBase:RU362057};	UDP-glucuronosyl and UDP-glucosyl transferase	GO:0043231,intracellular membrane-bounded organelle; GO:0102359,daphnetin 4-O-beta-glucosyltransferase activity; GO:0102361,esculetin 4-O-beta-glucosyltransferase activity; GO:0047218,hydroxycinnamate 4-beta-glucosyltransferase activity; GO:0080043,quercetin 3-O-glucosyltransferase activity; GO:0080044,quercetin 7-O-glucosyltransferase activity; GO:0050284,sinapate 1-glucosyltransferase activity;…	UDP-glucoronosyl and UDP-glucosyl transferase
BnaA01g18640D	0.2	0.4	0.79	2.91	1.51	0.97	-1.844	0.00321141	down	K07437 cytochrome P450 family 26 subfamily A | (RefSeq) cytochrome P450 708A2-like (A)	BnaA01g18640D [Brassica napus]	RecName: Full=Cytochrome P450 708A2; EC=1.14.-.-; AltName: Full=Thalianol hydroxylase; Short=AtTHAH;	SubName: Full=BnaA01g18640D protein {ECO:0000313|EMBL:CDY22926.1};	Cytochrome P450 CYP4/CYP19/CYP26 subfamilies	GO:0016021,integral component of membrane; GO:0020037,heme binding; GO:0005506,iron ion binding; GO:0004497,monooxygenase activity; GO:0016705,oxidoreductase activity, acting on paired donors, with incorporation or reduction of molecular oxygen; GO:0016132,brassinosteroid biosynthetic process; GO:0010268,brassinosteroid homeostasis; GO:0016125,sterol metabolic process	Cytochrome P450
BnaA01g18670D	9.61	6.53	8.87	1.61	2.28	1.53	2.308	5.05237e-14	up	K14709 solute carrier family 39 (zinc transporter), member 1/2/3 | (RefSeq) UDP-glucose flavonoid 3-O-glucosyltransferase 6-like (A)	BnaA01g18670D [Brassica napus]	RecName: Full=UDP-glycosyltransferase 71B5; EC=2.4.1.-;	SubName: Full=BnaA01g18670D protein {ECO:0000313|EMBL:CDY22929.1};	--	GO:0043231,intracellular membrane-bounded organelle; GO:0080043,quercetin 3-O-glucosyltransferase activity; GO:0080044,quercetin 7-O-glucosyltransferase activity; GO:0008152,metabolic process	UDP-glucoronosyl and UDP-glucosyl transferase
BnaA01g18690D	1.75	1.81	1.67	4.86	4.01	4.08	-1.208	1.047e-06	down	K14780 ATP-dependent RNA helicase DHX37/DHR1 [EC:3.6.4.13] | (RefSeq) ATP-dependent RNA helicase DEAH13-like isoform X1 (A)	BnaA01g18690D [Brassica napus]	--	SubName: Full=BnaA01g18690D protein {ECO:0000313|EMBL:CDY22931.1};	Galactosyltransferases	--	Fringe-like
BnaA01g19110D	52.26	37.83	35.86	2.4	5.39	4.8	3.415	1.05005e-29	up	K22139 mitochondrial pyruvate carrier 2 | (RefSeq) hypothetical protein (A)	early light-induced protein 2, chloroplastic [Brassica napus]	RecName: Full=Early light-induced protein 2, chloroplastic {ECO:0000305}; Flags: Precursor;	SubName: Full=BnaA01g19110D protein {ECO:0000313|EMBL:CDY29755.1};	--	GO:0009535,chloroplast thylakoid membrane; GO:0016021,integral component of membrane; GO:0009522,photosystem I; GO:0009523,photosystem II; GO:0071483,cellular response to blue light; GO:0071490,cellular response to far red light; GO:0034605,cellular response to heat; GO:0071486,cellular response to high light intensity; GO:0071491,cellular response to red light; GO:0071492,cellular response to UV…	Chlorophyll A-B binding protein
BnaA01g19270D	5	5.74	8.02	2.15	0.87	1.55	2.146	3.44078e-09	up	--	BnaA01g19270D [Brassica napus]	--	SubName: Full=Uncharacterized protein {ECO:0000313|EnsemblPlants:Bra036864.1-P};	START domain-containing proteins involved in steroidogenesis/phosphatidylcholine transfer	--	START domain
BnaA01g19540D	4.1	5.3	5.34	11.09	9.16	13.53	-1.095	3.14136e-07	down	K07179 RIO kinase 2 [EC:2.7.11.1] | (RefSeq) serine/threonine-protein kinase rio2 isoform X1 (A)	serine/threonine-protein kinase rio2 isoform X1 [Brassica napus]	--	SubName: Full=BnaA01g19540D protein {ECO:0000313|EMBL:CDY33287.1};	Serine/threonine protein kinase	--	Protein kinase domain
BnaA01g19870D	22.47	17.31	41.87	15.68	12.42	13.38	1.076	0.000168207	up	K14494 DELLA protein | (RefSeq) DELLA protein GAI-like (A)	scarecrow-like protein 30 isoform X1 [Brassica napus]	RecName: Full=Scarecrow-like protein 30; Short=AtSCL30; AltName: Full=GRAS family protein 17; Short=AtGRAS-17;	SubName: Full=Uncharacterized protein {ECO:0000313|EnsemblPlants:Bo1g070830.1};	--	GO:0005634,nucleus; GO:0003700,DNA-binding transcription factor activity; GO:0043565,sequence-specific DNA binding; GO:0006355,regulation of transcription, DNA-templated; GO:0010200,response to chitin; GO:0006351,transcription, DNA-templated	GRAS domain family
BnaA01g20090D	0	0	0.46	1.33	1.2	4.54	-3.825	0.0020815	down	--	uncharacterized protein LOC106414039 [Brassica napus]	--	SubName: Full=Uncharacterized protein {ECO:0000313|EnsemblPlants:Bra033799.1-P};	--	--	--
BnaA01g20360D	3.94	3.15	2.95	8.41	6.98	7.99	-1.115	1.44775e-07	down	K02492 glutamyl-tRNA reductase [EC:1.2.1.70] | (RefSeq) glutamyl-tRNA reductase 2, chloroplastic-like (A)	glutamyl-tRNA reductase 2, chloroplastic-like [Brassica napus]	RecName: Full=Glutamyl-tRNA reductase 2, chloroplastic; Short=GluTR; EC=1.2.1.70; Flags: Precursor;	RecName: Full=Glutamyl-tRNA reductase {ECO:0000256|RuleBase:RU000584}; EC=1.2.1.70 {ECO:0000256|RuleBase:RU000584};	--	GO:0009507,chloroplast; GO:0009536,plastid; GO:0008883,glutamyl-tRNA reductase activity; GO:0050661,NADP binding; GO:0015995,chlorophyll biosynthetic process; GO:0006783,heme biosynthetic process; GO:0006782,protoporphyrinogen IX biosynthetic process; GO:0006979,response to oxidative stress; GO:0033014,tetrapyrrole biosynthetic process	Ketopantoate reductase PanE/ApbA
BnaA01g20690D	1.84	0.95	1.16	5	2.74	4.28	-1.496	0.000129147	down	K14829 pre-rRNA-processing protein IPI3 | (RefSeq) protein ROOT INITIATION DEFECTIVE 3 (A)	PREDICTED: protein ROOT INITIATION DEFECTIVE 3 [Brassica rapa]	RecName: Full=Protein ROOT INITIATION DEFECTIVE 3; AltName: Full=Root initiation defective 3 protein; AltName: Full=WD-40 repeat-containing protein RID3;	SubName: Full=Uncharacterized protein {ECO:0000313|EnsemblPlants:Bra029937.1-P};	WD40 repeat protein	GO:0080008,Cul4-RING E3 ubiquitin ligase complex; GO:1902184,negative regulation of shoot apical meristem development	SMP-30/Gluconolactonase/LRE-like region
BnaA01g20710D	12.03	12.93	5.33	3.2	4.28	3.22	1.6	4.19992e-06	up	K15406 wax-ester synthase / diacylglycerol O-acyltransferase [EC:2.3.1.75 2.3.1.20] | (RefSeq) O-acyltransferase WSD1-like (A)	O-acyltransferase WSD1-like isoform X1 [Brassica napus]	RecName: Full=O-acyltransferase WSD1; AltName: Full=Diacylglycerol O-acyltransferase; Short=DGAT; EC=2.3.1.20; AltName: Full=Long-chain-alcohol O-fatty-acyltransferase; EC=2.3.1.75; AltName: Full=Wax synthase; Short=WS;	SubName: Full=Uncharacterized protein {ECO:0000313|EnsemblPlants:Bra029939.1-P};	--	GO:0005783,endoplasmic reticulum; GO:0005789,endoplasmic reticulum membrane; GO:0016021,integral component of membrane; GO:0005886,plasma membrane; GO:0102966,arachidoyl-CoA:1-dodecanol O-acyltransferase activity; GO:0004144,diacylglycerol O-acyltransferase activity; GO:0047196,long-chain-alcohol O-fatty-acyltransferase activity; GO:0103095,wax ester synthase activity; GO:0019432,triglyceride bio…	Protein of unknown function (DUF1298)
BnaA01g20760D	6.09	5.81	8.17	3.06	2.43	2.65	1.405	5.27441e-06	up	K01051 pectinesterase [EC:3.1.1.11] | (RefSeq) probable pectinesterase/pectinesterase inhibitor 34 (A)	probable pectinesterase/pectinesterase inhibitor 34 [Brassica napus]	RecName: Full=Probable pectinesterase/pectinesterase inhibitor 34; Includes: RecName: Full=Pectinesterase inhibitor 34; AltName: Full=Pectin methylesterase inhibitor 34; Includes: RecName: Full=Pectinesterase 34; Short=PE 34; EC=3.1.1.11; AltName: Full=Pectin methylesterase 34; Short=AtPME34;	RecName: Full=Pectinesterase {ECO:0000256|RuleBase:RU000589}; EC=3.1.1.11 {ECO:0000256|RuleBase:RU000589};	--	GO:0071944,cell periphery; GO:0016021,integral component of membrane; GO:0009505,plant-type cell wall; GO:0005886,plasma membrane; GO:0045330,aspartyl esterase activity; GO:0030599,pectinesterase activity; GO:0046910,pectinesterase inhibitor activity; GO:0042545,cell wall modification; GO:0045490,pectin catabolic process; GO:0010119,regulation of stomatal movement	Pectinesterase
BnaA01g20850D	2.02	1.99	2.58	5.4	6.02	5.22	-1.238	4.77599e-08	down	--	PREDICTED: uncharacterized protein LOC103875413 [Brassica rapa]	--	SubName: Full=Uncharacterized protein {ECO:0000313|EnsemblPlants:Bra029960.1-P};	--	--	--
BnaA01g21080D	2.14	1.92	15.1	0.4	0.98	0.86	3.179	0.000814202	up	K09422 transcription factor MYB, plant | (RefSeq) transcription factor MYB44-like (A)	PREDICTED: transcription factor MYB44-like [Brassica rapa]	RecName: Full=Transcription factor MYB77 {ECO:0000303|PubMed:11597504}; AltName: Full=Myb-related protein 77 {ECO:0000303|PubMed:11597504}; Short=AtMYB77 {ECO:0000303|PubMed:11597504}; AltName: Full=Myb-related protein R2 {ECO:0000303|PubMed:9678577}; Short=AtMYBR2 {ECO:0000303|PubMed:9678577};	SubName: Full=Uncharacterized protein {ECO:0000313|EnsemblPlants:Bra029990.1-P};	Transcription factor, Myb superfamily	GO:0005634,nucleus; GO:0003700,DNA-binding transcription factor activity; GO:0000981,DNA-binding transcription factor activity, RNA polymerase II-specific; GO:0043565,sequence-specific DNA binding; GO:0001135,RNA polymerase II transcription regulator recruiting activity; GO:0044212,transcription regulatory region DNA binding; GO:0030154,cell differentiation; GO:0048527,lateral root development; G…	--
BnaA01g21090D	17.93	6.43	71.4	3.11	2.46	4.86	3.298	0.000527386	up	K09422 transcription factor MYB, plant | (RefSeq) transcription factor MYB44-like (A)	PREDICTED: transcription factor MYB44-like [Brassica rapa]	RecName: Full=Transcription factor MYB77 {ECO:0000303|PubMed:11597504}; AltName: Full=Myb-related protein 77 {ECO:0000303|PubMed:11597504}; Short=AtMYB77 {ECO:0000303|PubMed:11597504}; AltName: Full=Myb-related protein R2 {ECO:0000303|PubMed:9678577}; Short=AtMYBR2 {ECO:0000303|PubMed:9678577};	SubName: Full=Uncharacterized protein {ECO:0000313|EnsemblPlants:Bra029990.1-P};	Transcription factor, Myb superfamily	GO:0005634,nucleus; GO:0003700,DNA-binding transcription factor activity; GO:0000981,DNA-binding transcription factor activity, RNA polymerase II-specific; GO:0043565,sequence-specific DNA binding; GO:0001135,RNA polymerase II transcription regulator recruiting activity; GO:0044212,transcription regulatory region DNA binding; GO:0030154,cell differentiation; GO:0048527,lateral root development; G…	SLIDE
BnaA01g21560D	4.7	12.02	7.71	45.69	30.5	47.45	-2.236	3.4713e-14	down	K00765 ATP phosphoribosyltransferase [EC:2.4.2.17] | (RefSeq) ATP phosphoribosyltransferase 1, chloroplastic (A)	BnaA01g21560D [Brassica napus]	RecName: Full=ATP phosphoribosyltransferase 1, chloroplastic; Short=ATP-PRTase 1; Short=AtATP-PRT1; EC=2.4.2.17; Flags: Precursor;	SubName: Full=BnaA01g21560D protein {ECO:0000313|EMBL:CDY23805.1};	ATP phosphoribosyltransferase	GO:0009507,chloroplast; GO:0009570,chloroplast stroma; GO:0003879,ATP phosphoribosyltransferase activity; GO:0000287,magnesium ion binding; GO:0000105,histidine biosynthetic process	HisG, C-terminal domain
BnaA01g21720D	23.34	20.48	19.61	6.52	7.18	6.67	1.74	8.13187e-22	up	--	BnaA01g21720D [Brassica napus]	RecName: Full=Phosphoglycerate mutase-like protein 2 {ECO:0000305}; Flags: Precursor;	SubName: Full=BnaA01g21720D protein {ECO:0000313|EMBL:CDY23821.1};	Predicted phosphoglycerate mutase	GO:0009507,chloroplast	Histidine phosphatase superfamily (branch 1)
BnaA01g21750D	19.59	25.26	13.47	5.95	6.29	4.18	1.927	1.25051e-12	up	K14209 solute carrier family 36 (proton-coupled amino acid transporter) | (RefSeq) probable amino acid permease 7 (A)	BnaA01g21750D [Brassica napus]	RecName: Full=Amino acid permease 1; AltName: Full=Amino acid transporter AAP1; AltName: Full=Neutral amino acid transporter II;	SubName: Full=Uncharacterized protein {ECO:0000313|EnsemblPlants:Bra035446.1-P};	Amino acid transporters	GO:0016021,integral component of membrane; GO:0005886,plasma membrane; GO:0015171,amino acid transmembrane transporter activity; GO:0015180,L-alanine transmembrane transporter activity; GO:0005313,L-glutamate transmembrane transporter activity; GO:0015186,L-glutamine transmembrane transporter activity; GO:0015193,L-proline transmembrane transporter activity; GO:0015194,L-serine transmembrane tran…	Transmembrane amino acid transporter protein
BnaA01g21850D	1.55	1.07	1.12	0.14	0.3	0.07	2.996	4.20573e-07	up	K21989 calcium permeable stress-gated cation channel | (RefSeq) CSC1-like protein RXW8 (A)	BnaA01g21850D [Brassica napus]	RecName: Full=CSC1-like protein RXW8;	SubName: Full=BnaA01g21850D protein {ECO:0000313|EMBL:CDY44554.1};	Uncharacterized conserved protein	GO:0016021,integral component of membrane; GO:0006811,ion transport	Cytosolic domain of 10TM putative phosphate transporter
BnaA01g22500D	4.05	4.59	5.1	10.7	8.31	11.37	-1.042	5.26333e-06	down	K00026 malate dehydrogenase [EC:1.1.1.37] | (RefSeq) uncharacterized protein LOC112291824 (A)	BnaA01g22500D [Brassica napus]	--	SubName: Full=BnaA01g22500D protein {ECO:0000313|EMBL:CDY24546.1};	--	--	Zinc-finger double-stranded RNA-binding
BnaA01g22590D	0.07	0.86	4.1	0.3	0.22	0.16	2.993	0.00959524	up	--	PREDICTED: F-box protein At1g61340 [Brassica rapa]	RecName: Full=F-box protein At1g61340;	SubName: Full=Uncharacterized protein {ECO:0000313|EnsemblPlants:Bra031435.1-P};	--	--	--
BnaA01g22800D	1.05	1.14	0.89	3.8	3.45	4.63	-1.852	3.94462e-11	down	K08869 aarF domain-containing kinase | (RefSeq) uncharacterized aarF domain-containing protein kinase 2 (A)	BnaA01g22800D [Brassica napus]	RecName: Full=Protein ACTIVITY OF BC1 COMPLEX KINASE 7, chloroplastic {ECO:0000303|PubMed:22694836}; Short=ABC1-LIKE KINASE 7 {ECO:0000303|PubMed:22694836}; EC=2.7.11.1 {ECO:0000250|UniProtKB:Q9MA15}; AltName: Full=Salt-induced ABC1 kinase 1, chloroplastic {ECO:0000303|PubMed:24117441}; Short=AtSIA1 {ECO:0000303|PubMed:24117441}; Flags: Precursor;	SubName: Full=BnaA01g22800D protein {ECO:0000313|EMBL:CDY49034.1};	Predicted unusual protein kinase	GO:0009535,chloroplast thylakoid membrane; GO:0016021,integral component of membrane; GO:0010287,plastoglobule; GO:0005524,ATP binding; GO:0016301,kinase activity; GO:0034599,cellular response to oxidative stress; GO:0055072,iron ion homeostasis; GO:0046467,membrane lipid biosynthetic process; GO:0080177,plastoglobule organization; GO:1901031,regulation of response to reactive oxygen species; GO:…	ABC1 family
BnaA01g22920D	18.57	17.47	17.05	3.96	2.36	2.47	2.705	2.6393e-35	up	K03327 multidrug resistance protein, MATE family | (RefSeq) protein DETOXIFICATION 37-like (A)	BnaA01g22920D [Brassica napus]	RecName: Full=Protein DETOXIFICATION 37 {ECO:0000303|PubMed:11739388}; Short=AtDTX37 {ECO:0000303|PubMed:11739388}; AltName: Full=Multidrug and toxic compound extrusion protein 37 {ECO:0000305}; Short=MATE protein 37 {ECO:0000305};	RecName: Full=Protein DETOXIFICATION {ECO:0000256|RuleBase:RU004914}; AltName: Full=Multidrug and toxic compound extrusion protein {ECO:0000256|RuleBase:RU004914};	Uncharacterized membrane protein, predicted efflux pump	GO:0016021,integral component of membrane; GO:0015297,antiporter activity; GO:0015238,drug transmembrane transporter activity; GO:0006855,drug transmembrane transport; GO:0080167,response to karrikin	MatE
BnaA01g23000D	9.97	5.62	6.08	1.93	3.35	2.51	1.575	0.000167702	up	--	BnaA01g23000D [Brassica napus]	RecName: Full=Strigolactone esterase RMS3 {ECO:0000305}; EC=3.1.-.- {ECO:0000305}; AltName: Full=Protein DWARF 14 homolog {ECO:0000305}; Short=PsD14 {ECO:0000303|PubMed:27479744}; AltName: Full=Protein RAMOSUS 3 {ECO:0000303|PubMed:27479744};	SubName: Full=BnaA01g23000D protein {ECO:0000313|EMBL:CDY47174.1};	--	GO:0005737,cytoplasm; GO:0005634,nucleus; GO:0016787,hydrolase activity; GO:1901601,strigolactone biosynthetic process	--
BnaA01g23120D	7.15	7.5	6.29	18.44	7.53	21.45	-1.064	0.00122757	down	K14498 serine/threonine-protein kinase SRK2 [EC:2.7.11.1] | (RefSeq) serine/threonine-protein kinase SRK2A (A)	PREDICTED: serine/threonine-protein kinase SRK2A [Brassica rapa]	RecName: Full=Serine/threonine-protein kinase SRK2B; EC=2.7.11.1; AltName: Full=OST1-kinase-like 6; AltName: Full=SNF1-related kinase 2.10; Short=SnRK2.10;	SubName: Full=Sucrose non-fermenting 1-related protein kinase 2 {ECO:0000313|EMBL:ALO51450.1};	Serine/threonine protein kinase	GO:0005829,cytosol; GO:0005634,nucleus; GO:0005524,ATP binding; GO:0016301,kinase activity; GO:0070300,phosphatidic acid binding; GO:0004672,protein kinase activity; GO:0004674,protein serine/threonine kinase activity; GO:0035556,intracellular signal transduction; GO:0048527,lateral root development; GO:0006970,response to osmotic stress; GO:0009651,response to salt stress	WhiA C-terminal HTH domain
BnaA01g23160D	388.61	326.99	374.88	134.1	181.12	117.9	1.424	1.44125e-13	up	K02639 ferredoxin | (RefSeq) ferredoxin, leaf L-A (A)	PREDICTED: ferredoxin, leaf L-A [Brassica rapa]	RecName: Full=Ferredoxin-2, chloroplastic; Short=AtFd2; Flags: Precursor;	RecName: Full=Ferredoxin {ECO:0000256|RuleBase:RU364001};	--	GO:0009507,chloroplast; GO:0051537,2 iron, 2 sulfur cluster binding; GO:0009055,electron transfer activity; GO:0046872,metal ion binding; GO:0009643,photosynthetic acclimation; GO:0009767,photosynthetic electron transport chain	2Fe-2S iron-sulfur cluster binding domain
BnaA01g23170D	4.76	3.75	2.58	20.66	7.7	19.51	-1.991	6.76843e-08	down	K14709 solute carrier family 39 (zinc transporter), member 1/2/3 | (RefSeq) zinc transporter 4, chloroplastic-like (A)	BnaA01g23170D [Brassica napus]	RecName: Full=Fe(2+) transport protein 3, chloroplastic; AltName: Full=Fe(II) transport protein 3; AltName: Full=Iron-regulated transporter 3; Flags: Precursor;	SubName: Full=BnaA01g23170D protein {ECO:0000313|EMBL:CDY46195.1};	Fe2+/Zn2+ regulated transporter	GO:0009535,chloroplast thylakoid membrane; GO:0016021,integral component of membrane; GO:0005886,plasma membrane; GO:0005774,vacuolar membrane; GO:0005381,iron ion transmembrane transporter activity; GO:0005385,zinc ion transmembrane transporter activity; GO:0055072,iron ion homeostasis; GO:0006826,iron ion transport; GO:0009624,response to nematode; GO:0006829,zinc ion transport	ZIP Zinc transporter
BnaA01g23290D	3.67	2.57	2.94	0.97	1.23	0.9	1.67	4.72884e-05	up	--	BnaA01g23290D [Brassica napus]	RecName: Full=Uncharacterized protein At4g02000;	SubName: Full=BnaA01g23290D protein {ECO:0000313|EMBL:CDY18068.1};	FOG: Reverse transcriptase	--	Zinc knuckle
BnaA01g23420D	7.56	6.69	6.93	1.41	1.98	1.46	2.23	6.77644e-23	up	K08869 aarF domain-containing kinase | (RefSeq) uncharacterized protein sll0005-like (A)	BnaA01g23420D [Brassica napus]	RecName: Full=Protein ACTIVITY OF BC1 COMPLEX KINASE 3, chloroplastic {ECO:0000303|PubMed:23673981}; Short=ABC1-LIKE KINASE 3 {ECO:0000303|PubMed:23673981}; EC=2.7.-.- {ECO:0000255|PROSITE-ProRule:PRU00159}; EC=2.7.11.1 {ECO:0000269|PubMed:23632854}; AltName: Full=Protein REPRESSOR OF BDR1 {ECO:0000303|PubMed:25882344}; Flags: Precursor;	SubName: Full=BnaA01g23420D protein {ECO:0000313|EMBL:CDY18081.1};	Predicted unusual protein kinase	GO:0009507,chloroplast; GO:0010287,plastoglobule; GO:0005524,ATP binding; GO:0004672,protein kinase activity; GO:0006995,cellular response to nitrogen starvation; GO:0009658,chloroplast organization; GO:0080177,plastoglobule organization; GO:0050821,protein stabilization; GO:1902171,regulation of tocopherol cyclase activity; GO:0009644,response to high light intensity; GO:0080183,response to phot…	Protein kinase domain
BnaA01g23660D	6.95	6.36	6.78	15.54	15.43	17.67	-1.175	1.66632e-11	down	K14847 ribosome production factor 2 | (RefSeq) ribosome production factor 2 homolog (A)	BnaA01g23660D [Brassica napus]	RecName: Full=Ribosome production factor 2 homolog; AltName: Full=Brix domain-containing protein 1 homolog; AltName: Full=Ribosome biogenesis protein RPF2 homolog;	SubName: Full=BnaA01g23660D protein {ECO:0000313|EMBL:CDY18105.1};	Protein required for biogenesis of the ribosomal 60S subunit	GO:0005730,nucleolus; GO:0019843,rRNA binding; GO:0000463,maturation of LSU-rRNA from tricistronic rRNA transcript (SSU-rRNA, 5.8S rRNA, LSU-rRNA); GO:0000027,ribosomal large subunit assembly	Brix domain
BnaA01g23790D	6.12	4.91	3.71	1.95	1.15	1.14	1.913	4.58234e-08	up	K03327 multidrug resistance protein, MATE family | (RefSeq) protein DETOXIFICATION 19-like (A)	BnaA01g23790D [Brassica napus]	RecName: Full=Protein DETOXIFICATION 19 {ECO:0000303|PubMed:11739388}; Short=AtDTX19 {ECO:0000303|PubMed:11739388}; AltName: Full=Multidrug and toxic compound extrusion protein 19 {ECO:0000305}; Short=MATE protein 19 {ECO:0000305}; AltName: Full=Protein ABERRANT LATERAL ROOT FORMATION 5 {ECO:0000303|PubMed:11449055};	RecName: Full=Protein DETOXIFICATION {ECO:0000256|RuleBase:RU004914}; AltName: Full=Multidrug and toxic compound extrusion protein {ECO:0000256|RuleBase:RU004914};	Uncharacterized membrane protein, predicted efflux pump	GO:0016021,integral component of membrane; GO:0015297,antiporter activity; GO:0015238,drug transmembrane transporter activity; GO:0006855,drug transmembrane transport; GO:0009636,response to toxic substance	MatE
BnaA01g24310D	5.37	5.99	5	2.5	2.23	1.83	1.426	3.18645e-08	up	--	BnaA01g24310D [Brassica napus]	--	SubName: Full=BnaA01g24310D protein {ECO:0000313|EMBL:CDY35481.1};	--	--	--
BnaA01g24440D	228.79	172.69	139.86	1.29	0.56	0.52	7.978	5.06114e-145	up	K22139 mitochondrial pyruvate carrier 2 | (RefSeq) hypothetical protein (A)	PREDICTED: early light-induced protein 1, chloroplastic [Brassica rapa]	RecName: Full=Early light-induced protein 1, chloroplastic {ECO:0000305}; Flags: Precursor;	SubName: Full=BnaA01g24440D protein {ECO:0000313|EMBL:CDY34227.1};	--	GO:0009535,chloroplast thylakoid membrane; GO:0016021,integral component of membrane; GO:0009522,photosystem I; GO:0009523,photosystem II; GO:0071483,cellular response to blue light; GO:0071490,cellular response to far red light; GO:0034605,cellular response to heat; GO:0071486,cellular response to high light intensity; GO:0071491,cellular response to red light; GO:0071492,cellular response to UV…	Adenylate cyclase associated (CAP) N terminal
BnaA01g24550D	1.87	2.23	3.68	7.38	6.15	7.69	-1.346	1.64841e-05	down	K14823 rRNA-processing protein EBP2 | (RefSeq) probable rRNA-processing protein EBP2 homolog (A)	BnaA01g24550D [Brassica napus]	RecName: Full=Probable rRNA-processing protein EBP2 homolog;	SubName: Full=BnaA01g24550D protein {ECO:0000313|EMBL:CDY34238.1};	Nucleolar protein-like/EBNA1-binding protein	GO:0034399,nuclear periphery; GO:0005730,nucleolus; GO:0030687,preribosome, large subunit precursor; GO:0003924,GTPase activity; GO:0003723,RNA binding; GO:0042273,ribosomal large subunit biogenesis; GO:0006364,rRNA processing	Eukaryotic rRNA processing protein EBP2
BnaA01g24630D	14.39	14.65	15.36	9.99	4.5	9.39	1.004	0.00029399	up	--	BnaA01g24630D [Brassica napus]	RecName: Full=Protein MARD1 {ECO:0000303|PubMed:15159630}; AltName: Full=Mediator of ABA-regulated dormancy1 {ECO:0000303|PubMed:15159630}; AltName: Full=Senescence-associated protein SAG102 {ECO:0000303|PubMed:11402199};	SubName: Full=BnaA01g24630D protein {ECO:0000313|EMBL:CDY34246.1};	--	GO:0010494,cytoplasmic stress granule; GO:0000932,P-body; GO:0046872,metal ion binding; GO:0009737,response to abscisic acid; GO:0010162,seed dormancy process	zinc-finger of the FCS-type, C2-C2
BnaA01g24750D	3.97	1.18	2.76	0.59	0.36	0.47	2.585	8.03409e-07	up	K01237 myrosinase [EC:3.2.1.147] | (RefSeq) myrosinase MA1-like (A)	BnaA01g24750D [Brassica napus]	RecName: Full=Myrosinase MA1; EC=3.2.1.147; AltName: Full=Sinigrinase; AltName: Full=Thioglucosidase;	SubName: Full=BnaA01g24750D protein {ECO:0000313|EMBL:CDY39513.1};	Beta-glucosidase, lactase phlorizinhydrolase, and related proteins	GO:0005773,vacuole; GO:0102799,glucosinolate glucohydrolase activity; GO:0046872,metal ion binding; GO:0019137,thioglucosidase activity; GO:0005975,carbohydrate metabolic process	Glycosyl hydrolase family 1
BnaA01g24810D	0.99	0.96	0.9	1.89	3.73	1.71	-1.28	0.000923263	down	K04733 interleukin-1 receptor-associated kinase 4 [EC:2.7.11.1] | (RefSeq) cysteine-rich receptor-like protein kinase 8 isoform X1 (A)	BnaA01g24810D [Brassica napus]	RecName: Full=Cysteine-rich receptor-like protein kinase 10; Short=Cysteine-rich RLK10; EC=2.7.11.-; AltName: Full=Receptor-like protein kinase 4; Flags: Precursor;	SubName: Full=BnaA01g24810D protein {ECO:0000313|EMBL:CDY39507.1};	--	GO:0016021,integral component of membrane; GO:0005886,plasma membrane; GO:0005524,ATP binding; GO:0004674,protein serine/threonine kinase activity; GO:0042742,defense response to bacterium; GO:0006468,protein phosphorylation	Haspin like kinase domain
BnaA01g24840D	2.84	2.66	4.22	13.59	16.35	17.14	-2.178	5.51757e-22	down	K20027 palmitoyltransferase ZDHHC1/11 [EC:2.3.1.225] | (RefSeq) probable protein S-acyltransferase 20 (A)	BnaA01g24840D [Brassica napus]	RecName: Full=Probable protein S-acyltransferase 20; EC=2.3.1.225; AltName: Full=Probable palmitoyltransferase At3g22180; AltName: Full=Zinc finger DHHC domain-containing protein At3g22180;	RecName: Full=S-acyltransferase {ECO:0000256|RuleBase:RU079119}; EC=2.3.1.225 {ECO:0000256|RuleBase:RU079119}; AltName: Full=Palmitoyltransferase {ECO:0000256|RuleBase:RU079119};	DHHC-type Zn-finger proteins	GO:0030659,cytoplasmic vesicle membrane; GO:0016021,integral component of membrane; GO:0005886,plasma membrane; GO:0019706,protein-cysteine S-palmitoyltransferase activity	DHHC palmitoyltransferase
BnaA01g24990D	26.82	23.01	16.83	2.17	2.21	1.2	3.689	8.2316e-38	up	K13068 sinapate 1-glucosyltransferase [EC:2.4.1.120] | (RefSeq) UDP-glycosyltransferase 84A2 isoform X1 (A)	UDP-glycosyltransferase 84A2 isoform X1 [Brassica napus]	RecName: Full=UDP-glycosyltransferase 84A2; EC=2.4.1.-; AltName: Full=Sinapate 1-glucosyltransferase 1; Short=AtSGT1; EC=2.4.1.120;	RecName: Full=Glycosyltransferase {ECO:0000256|RuleBase:RU362057}; EC=2.4.1.- {ECO:0000256|RuleBase:RU362057};	UDP-glucuronosyl and UDP-glucosyl transferase	GO:0005737,cytoplasm; GO:0043231,intracellular membrane-bounded organelle; GO:0080043,quercetin 3-O-glucosyltransferase activity; GO:0080044,quercetin 7-O-glucosyltransferase activity; GO:0050284,sinapate 1-glucosyltransferase activity; GO:0009718,anthocyanin-containing compound biosynthetic process; GO:0009801,cinnamic acid ester metabolic process; GO:0080167,response to karrikin; GO:0009636,res…	UDP-glucoronosyl and UDP-glucosyl transferase
BnaA01g25020D	2.05	3.1	3.05	1.17	0.32	1.08	1.77	0.00115412	up	K14490 histidine-containing phosphotransfer peotein | (RefSeq) histidine-containing phosphotransfer protein 1 (A)	PREDICTED: histidine-containing phosphotransfer protein 1 [Brassica rapa]	RecName: Full=Histidine-containing phosphotransfer protein 1;	SubName: Full=Uncharacterized protein {ECO:0000313|EnsemblPlants:Bra023876.1-P};	Two-component phosphorelay intermediate involved in MAP kinase cascade regulation	GO:0005737,cytoplasm; GO:0005829,cytosol; GO:0005634,nucleus; GO:0009927,histidine phosphotransfer kinase activity; GO:0043424,protein histidine kinase binding; GO:0009736,cytokinin-activated signaling pathway; GO:0000160,phosphorelay signal transduction system	Hpt domain
BnaA01g25130D	0.07	0	0.2	1.5	0.21	1.24	-3.303	0.00901994	down	K16290 xylem cysteine proteinase [EC:3.4.22.-] | (RefSeq) cysteine protease XCP2 (A)	BnaA01g25130D [Brassica napus]	RecName: Full=Cysteine protease XCP2 {ECO:0000305}; EC=3.4.22.-; AltName: Full=Xylem cysteine peptidase 2 {ECO:0000303|PubMed:10889267}; Short=AtXCP2 {ECO:0000303|PubMed:10889267}; Flags: Precursor;	SubName: Full=BnaA01g25130D protein {ECO:0000313|EMBL:CDY37293.1};	Cysteine proteinase Cathepsin L	GO:0005618,cell wall; GO:0005615,extracellular space; GO:0005764,lysosome; GO:0005886,plasma membrane; GO:0004197,cysteine-type endopeptidase activity; GO:0042742,defense response to bacterium; GO:0010623,programmed cell death involved in cell development; GO:0051603,proteolysis involved in cellular protein catabolic process	Papain family cysteine protease
BnaA01g25350D	0.76	1.83	2.13	3.23	3.93	3.69	-1.11	0.00550026	down	K01923 phosphoribosylaminoimidazole-succinocarboxamide synthase [EC:6.3.2.6] | (RefSeq) phosphoribosylaminoimidazole-succinocarboxamide synthase, chloroplastic (A)	phosphoribosylaminoimidazole-succinocarboxamide synthase, chloroplastic [Brassica napus]	RecName: Full=Phosphoribosylaminoimidazole-succinocarboxamide synthase, chloroplastic; EC=6.3.2.6; AltName: Full=SAICAR synthetase; Flags: Precursor;	SubName: Full=BnaA01g25350D protein {ECO:0000313|EMBL:CDY37315.1};	Phosphoribosylamidoimidazole-succinocarboxamide synthase	GO:0009507,chloroplast; GO:0009570,chloroplast stroma; GO:0005524,ATP binding; GO:0004639,phosphoribosylaminoimidazolesuccinocarboxamide synthase activity; GO:0006189,'de novo' IMP biosynthetic process; GO:0009733,response to auxin	SAICAR synthetase
BnaA01g25860D	4.61	3.72	5.28	8.94	14.03	7.85	-1.091	0.000119915	down	K03063 26S proteasome regulatory subunit T3 | (RefSeq) 26S protease regulatory subunit 6B homolog (A)	BnaA01g25860D [Brassica napus]	RecName: Full=BTB/POZ domain-containing protein At3g19850;	SubName: Full=BnaA01g25860D protein {ECO:0000313|EMBL:CDY42209.1};	--	GO:0016567,protein ubiquitination	NPH3 family
BnaA01g25890D	29.54	27.12	28.96	10.06	13.24	9.02	1.504	1.55413e-12	up	--	PREDICTED: uncharacterized protein LOC103836959 [Brassica rapa]	RecName: Full=Large ribosomal RNA subunit accumulation protein YCED homolog 2, chloroplastic {ECO:0000305}; AltName: Full=Protein DUF177B {ECO:0000303|PubMed:27574185}; Flags: Precursor;	SubName: Full=Uncharacterized protein {ECO:0000313|EnsemblPlants:Bra038232.1-P};	--	GO:0009507,chloroplast; GO:0042254,ribosome biogenesis	Large ribosomal RNA subunit accumulation protein YceD
BnaA01g26030D	12.7	7.01	22.54	5.43	4.13	4.69	1.669	2.0584e-05	up	K22534 PR domain zinc finger protein 5 | (RefSeq) zinc finger protein ZAT4-like (A)	BnaA01g26030D [Brassica napus]	RecName: Full=Zinc finger protein AZF2; AltName: Full=Zinc-finger protein 2;	SubName: Full=BnaA01g26030D protein {ECO:0000313|EMBL:CDY42192.1};	FOG: Zn-finger	GO:0005634,nucleus; GO:0003677,DNA binding; GO:0003700,DNA-binding transcription factor activity; GO:0046872,metal ion binding; GO:0043565,sequence-specific DNA binding; GO:0044212,transcription regulatory region DNA binding; GO:0009738,abscisic acid-activated signaling pathway; GO:0009793,embryo development ending in seed dormancy; GO:0042538,hyperosmotic salinity response; GO:0045892,negative r…	Coronavirus nucleocapsid protein
BnaA01g26250D	2.59	4.12	3.28	14.16	9.36	10.08	-1.647	7.41848e-11	down	K03231 elongation factor 1-alpha | (RefSeq) polyadenylate-binding protein RBP45A-like (A)	BnaA01g26250D [Brassica napus]	RecName: Full=Polyadenylate-binding protein RBP47B; Short=Poly(A)-binding protein RBP47B; AltName: Full=RNA-binding protein 47B; Short=AtRBP47B;	SubName: Full=BnaA01g26250D protein {ECO:0000313|EMBL:CDY18570.1};	FOG: RRM domain	GO:0010494,cytoplasmic stress granule; GO:0005829,cytosol; GO:0005634,nucleus; GO:0003729,mRNA binding; GO:0008143,poly(A) binding; GO:0034605,cellular response to heat; GO:0006397,mRNA processing	Nup53/35/40-type RNA recognition motif
BnaA01g26430D	9.49	6.78	4.57	1.3	2.8	2.21	1.819	1.14496e-06	up	K08150 MFS transporter, SP family, solute carrier family 2 (myo-inositol transporter), member 13 | (RefSeq) inositol transporter 1 (A)	PREDICTED: polyol transporter 5 [Brassica rapa]	RecName: Full=Polyol transporter 5; AltName: Full=Protein POLYOL TRANSPORTER 5; Short=AtPLT5; AltName: Full=Sugar-proton symporter PLT5;	SubName: Full=Uncharacterized protein {ECO:0000313|EnsemblPlants:Bra037555.1-P};	Predicted transporter (major facilitator superfamily)	GO:0016021,integral component of membrane; GO:0005886,plasma membrane; GO:0015591,D-ribose transmembrane transporter activity; GO:0015148,D-xylose transmembrane transporter activity; GO:0005354,galactose transmembrane transporter activity; GO:0005355,glucose transmembrane transporter activity; GO:0015168,glycerol transmembrane transporter activity; GO:0015575,mannitol transmembrane transporter ac…	MFS/sugar transport protein
BnaA01g26650D	1.34	1.32	1.69	6.1	5.3	6.29	-1.924	5.25289e-16	down	K13179 ATP-dependent RNA helicase DDX18/HAS1 [EC:3.6.4.13] | (RefSeq) DEAD-box ATP-dependent RNA helicase 51 (A)	DEAD-box ATP-dependent RNA helicase 51 [Brassica napus]	RecName: Full=DEAD-box ATP-dependent RNA helicase 51; EC=3.6.4.13;	RecName: Full=RNA helicase {ECO:0000256|SAAS:SAAS00892872}; EC=3.6.4.13 {ECO:0000256|SAAS:SAAS00892872};	ATP-dependent RNA helicase pitchoune	GO:0005737,cytoplasm; GO:0005730,nucleolus; GO:0005524,ATP binding; GO:0004004,ATP-dependent RNA helicase activity; GO:0003723,RNA binding; GO:0010501,RNA secondary structure unwinding	Type III restriction enzyme, res subunit
BnaA01g26860D	4.15	4.36	6.25	14.92	11.76	15.08	-1.4	3.03235e-11	down	K09496 T-complex protein 1 subunit delta | (RefSeq) T-complex protein 1 subunit delta (A)	BnaA01g26860D [Brassica napus]	RecName: Full=T-complex protein 1 subunit delta {ECO:0000303|PubMed:11599560}; Short=TCP-1-delta {ECO:0000303|PubMed:11599560}; AltName: Full=CCT-delta {ECO:0000303|PubMed:11599560}; AltName: Full=Chaperonin CCT4 {ECO:0000305};	RecName: Full=T-complex protein 1 subunit delta {ECO:0000256|RuleBase:RU004192};	Chaperonin complex component, TCP-1 delta subunit (CCT4)	GO:0005832,chaperonin-containing T-complex; GO:0005829,cytosol; GO:0005524,ATP binding; GO:0044183,protein binding involved in protein folding; GO:0051082,unfolded protein binding; GO:0006458,'de novo' protein folding; GO:0061077,chaperone-mediated protein folding; GO:0046686,response to cadmium ion	TCP-1/cpn60 chaperonin family
BnaA01g27000D	20.62	22.93	24.72	63.27	84.73	56.23	-1.491	1.22539e-14	down	K05350 beta-glucosidase [EC:3.2.1.21] | (RefSeq) beta-glucosidase 44 (A)	PREDICTED: beta-glucosidase 44 [Brassica rapa]	RecName: Full=Beta-glucosidase 44; Short=AtBGLU44; EC=3.2.1.21; Flags: Precursor;	SubName: Full=Uncharacterized protein {ECO:0000313|EnsemblPlants:Bra021292.1-P};	Beta-glucosidase, lactase phlorizinhydrolase, and related proteins	GO:0005618,cell wall; GO:0022626,cytosolic ribosome; GO:0005576,extracellular region; GO:0009505,plant-type cell wall; GO:0080081,4-methylumbelliferyl-beta-D-glucopyranoside beta-glucosidase activity; GO:0047668,amygdalin beta-glucosidase activity; GO:0080083,beta-gentiobiose beta-glucosidase activity; GO:0008422,beta-glucosidase activity; GO:0004567,beta-mannosidase activity; GO:0080079,cellobio…	Glycosyl hydrolase family 1
BnaA01g27360D	2.09	1.27	3.04	0.97	0.53	1.15	1.374	0.00813524	up	--	BnaA01g27360D [Brassica napus]	--	SubName: Full=BnaA01g27360D protein {ECO:0000313|EMBL:CDY34998.1};	--	--	--
BnaA01g27410D	3.99	3.46	2.27	6.44	6.17	8.94	-1.046	0.00200438	down	--	BnaA01g27410D [Brassica napus]	RecName: Full=Transcription factor bHLH147; AltName: Full=ATBS1 interacting factor 3; AltName: Full=Basic helix-loop-helix protein 147; Short=AtbHLH147; Short=bHLH 147; AltName: Full=Transcription factor EN 142; AltName: Full=bHLH transcription factor bHLH147;	SubName: Full=BnaA01g27410D protein {ECO:0000313|EMBL:CDY34993.1};	--	GO:0005634,nucleus; GO:0003677,DNA binding; GO:0003700,DNA-binding transcription factor activity; GO:0046983,protein dimerization activity; GO:0006355,regulation of transcription, DNA-templated; GO:0006351,transcription, DNA-templated	--
BnaA01g27520D	0.73	0.89	0.78	1.58	1.64	1.99	-1.023	0.00258984	down	K17964 leucine-rich PPR motif-containing protein, mitochondrial | (RefSeq) pentatricopeptide repeat-containing protein At5g61990, mitochondrial (A)	BnaA01g27520D [Brassica napus]	RecName: Full=Putative pentatricopeptide repeat-containing protein At3g16890, mitochondrial; AltName: Full=Protein PENTATRICOPEPTIDE REPEAT 40; Flags: Precursor;	SubName: Full=BnaA01g27520D protein {ECO:0000313|EMBL:CDY34982.1};	FOG: PPR repeat	GO:0005739,mitochondrion; GO:0004519,endonuclease activity; GO:0003723,RNA binding; GO:0042775,mitochondrial ATP synthesis coupled electron transport; GO:0009737,response to abscisic acid; GO:0006979,response to oxidative stress; GO:0009651,response to salt stress; GO:0009451,RNA modification	Tetratricopeptide repeat
BnaA01g27550D	1.55	2.55	1.91	4.84	4.46	4.74	-1.125	2.76839e-06	down	K14805 ATP-dependent RNA helicase DDX24/MAK5 [EC:3.6.4.13] | (RefSeq) DEAD-box ATP-dependent RNA helicase 13-like (A)	BnaA01g27550D [Brassica napus]	RecName: Full=DEAD-box ATP-dependent RNA helicase 13; EC=3.6.4.13;	SubName: Full=BnaA01g27550D protein {ECO:0000313|EMBL:CDY34979.1};	RNA helicase	GO:0005737,cytoplasm; GO:0005730,nucleolus; GO:0005524,ATP binding; GO:0004004,ATP-dependent RNA helicase activity; GO:0003723,RNA binding; GO:0010501,RNA secondary structure unwinding	Type III restriction enzyme, res subunit
BnaA01g27570D	31.66	25.12	25.97	7.23	8.03	6.95	2	2.54776e-25	up	K09286 EREBP-like factor | (RefSeq) ethylene-responsive transcription factor RAP2-3 (A)	ethylene-responsive transcription factor RAP2-3 [Brassica napus]	RecName: Full=Ethylene-responsive transcription factor RAP2-3; AltName: Full=Cadmium-induced protein AS30; AltName: Full=Ethylene response factor 72; Short=ERF72; AltName: Full=Ethylene-responsive element binding protein; Short=AtEBP; AltName: Full=Protein RELATED TO APETALA2 3; Short=Related to AP2 3;	SubName: Full=BnaA01g27570D protein {ECO:0000313|EMBL:CDY34977.1};	--	GO:0005737,cytoplasm; GO:0005634,nucleus; GO:0005886,plasma membrane; GO:0003677,DNA binding; GO:0003700,DNA-binding transcription factor activity; GO:0043565,sequence-specific DNA binding; GO:0008219,cell death; GO:0009873,ethylene-activated signaling pathway; GO:0010286,heat acclimation; GO:0045893,positive regulation of transcription, DNA-templated; GO:0009735,response to cytokinin; GO:0009723…	AP2 domain
BnaA01g27890D	1.42	1.65	1.72	0.41	0.71	0.56	1.602	0.00209968	up	K12486 stromal membrane-associated protein | (RefSeq) probable ADP-ribosylation factor GTPase-activating protein AGD15 (A)	BnaA01g27890D [Brassica napus]	RecName: Full=Probable ADP-ribosylation factor GTPase-activating protein AGD15; Short=ARF GAP AGD15; AltName: Full=Protein ARF-GAP DOMAIN 15; Short=AtAGD15;	SubName: Full=BnaA01g27890D protein {ECO:0000313|EMBL:CDY46889.1};	Predicted GTPase-activating protein	GO:0005096,GTPase activator activity; GO:0046872,metal ion binding	Putative GTPase activating protein for Arf
BnaA01g27990D	4.22	3.9	5.59	11.11	9.58	11.63	-1.136	3.9213e-08	down	K02906 large subunit ribosomal protein L3 | (RefSeq) 50S ribosomal protein L3-2, chloroplastic-like (A)	50S ribosomal protein L3-2, chloroplastic-like [Brassica napus]	RecName: Full=50S ribosomal protein L3-2, chloroplastic; Flags: Precursor;	SubName: Full=BnaA01g27990D protein {ECO:0000313|EMBL:CDY46899.1};	Mitochondrial/chloroplast ribosomal protein L3	GO:0009507,chloroplast; GO:0005739,mitochondrion; GO:0005840,ribosome; GO:0019843,rRNA binding; GO:0003735,structural constituent of ribosome; GO:0006412,translation	Ribosomal protein L3
BnaA01g28110D	51.09	46.78	53.69	20.51	29.26	22.54	1.162	2.73482e-09	up	--	BnaA01g28110D [Brassica napus]	RecName: Full=Photosynthetic NDH subunit of subcomplex B 3, chloroplastic {ECO:0000303|PubMed:21785130}; Short=Protein PnsB3 {ECO:0000303|PubMed:21785130}; AltName: Full=NDH-DEPENDENT CYCLIC ELECTRON FLOW 4 {ECO:0000303|PubMed:18785996}; Flags: Precursor;	SubName: Full=BnaA01g28110D protein {ECO:0000313|EMBL:CDY20191.1};	--	GO:0009507,chloroplast; GO:0009535,chloroplast thylakoid membrane; GO:0010598,NAD(P)H dehydrogenase complex (plastoquinone); GO:0051537,2 iron, 2 sulfur cluster binding; GO:0009055,electron transfer activity; GO:0046872,metal ion binding; GO:0009773,photosynthetic electron transport in photosystem I	2Fe-2S iron-sulfur cluster binding domain
BnaA01g28120D	30.43	50.13	39.31	104.24	109.4	116.62	-1.365	9.19203e-14	down	K09873 aquaporin TIP | (RefSeq) aquaporin TIP2-1 (A)	BnaA01g28120D [Brassica napus]	RecName: Full=Aquaporin TIP2-1; AltName: Full=Delta-tonoplast intrinsic protein; Short=Delta-TIP; AltName: Full=Tonoplast intrinsic protein 2-1; Short=AtTIP2;1; Contains: RecName: Full=Aquaporin TIP2-1, N-terminally processed;	SubName: Full=BnaA01g28120D protein {ECO:0000313|EMBL:CDY20190.1};	Aquaporin (major intrinsic protein family)	GO:0005618,cell wall; GO:0042807,central vacuole; GO:0009507,chloroplast; GO:0009941,chloroplast envelope; GO:0005794,Golgi apparatus; GO:0005887,integral component of plasma membrane; GO:0009505,plant-type cell wall; GO:0009705,plant-type vacuole membrane; GO:0005886,plasma membrane; GO:0009506,plasmodesma; GO:0000326,protein storage vacuole; GO:0005774,vacuolar membrane; GO:0005773,vacuole; GO:…	Major intrinsic protein
BnaA01g28130D	0.12	0.12	0.08	0.68	0.75	0.92	-2.74	0.000823308	down	K18666 activating signal cointegrator complex subunit 1 | (RefSeq) uncharacterized protein LOC106376858 isoform X1 (A)	BnaA01g28130D [Brassica napus]	--	SubName: Full=BnaA01g28130D protein {ECO:0000313|EMBL:CDY20189.1};	Transcription coactivator complex, P50 component (LigT RNA ligase/phosphodiesterase family)	--	AKAP7 2'5' RNA ligase-like domain
BnaA01g28190D	2.84	3.21	2.7	0	0	0.38	4.494	3.00119e-08	up	K13051 beta-aspartyl-peptidase (threonine type) [EC:3.4.19.5] | (RefSeq) probable isoaspartyl peptidase/L-asparaginase 2 (A)	BnaA01g28190D [Brassica napus]	RecName: Full=Probable isoaspartyl peptidase/L-asparaginase 2; EC=3.4.19.5; AltName: Full=L-asparagine amidohydrolase 2; Contains: RecName: Full=Isoaspartyl peptidase/L-asparaginase 2 subunit alpha; Contains: RecName: Full=Isoaspartyl peptidase/L-asparaginase 2 subunit beta; Flags: Precursor;	SubName: Full=BnaA01g28190D protein {ECO:0000313|EMBL:CDY20183.1};	Asparaginase	GO:0004067,asparaginase activity; GO:0008798,beta-aspartyl-peptidase activity	Asparaginase
BnaA01g28200D	105.94	84.06	92.25	32.23	49.68	27.86	1.454	2.22198e-09	up	K02695 photosystem I subunit VI | (RefSeq) photosystem I reaction center subunit VI-1, chloroplastic (A)	photosystem I reaction center subunit VI-1, chloroplastic [Brassica napus]	RecName: Full=Photosystem I reaction center subunit VI, chloroplastic; Short=PSI-H; AltName: Full=Light-harvesting complex I 11 kDa protein; Flags: Precursor;	SubName: Full=BnaA01g28200D protein {ECO:0000313|EMBL:CDY20182.1};	--	GO:0009535,chloroplast thylakoid membrane; GO:0016021,integral component of membrane; GO:0009538,photosystem I reaction center; GO:0015979,photosynthesis	Photosystem I reaction centre subunit VI
BnaA01g28500D	13.74	11.02	13.17	5.51	6.92	5.36	1.191	2.39683e-07	up	K02213 cell division control protein 6 | (RefSeq) cell division control protein 6 homolog B-like isoform X1 (A)	BnaA01g28500D [Brassica napus]	RecName: Full=Methyl-CpG-binding domain-containing protein 11; Short=AtMBD11; Short=MBD11; AltName: Full=Methyl-CpG-binding protein MBD11;	SubName: Full=BnaA01g28500D protein {ECO:0000313|EMBL:CDY20152.1};	--	GO:0005634,nucleus; GO:0008327,methyl-CpG binding; GO:0006355,regulation of transcription, DNA-templated; GO:0006351,transcription, DNA-templated	Methyl-CpG binding domain
BnaA01g28510D	5.89	4.86	3.44	3.36	1.95	2.07	1.054	0.0112321	up	--	BnaA01g28510D [Brassica napus]	--	SubName: Full=BnaA01g28510D protein {ECO:0000313|EMBL:CDY20151.1};	--	--	--
BnaA01g28530D	61.87	63.41	68.87	33.9	28.78	32.49	1.13	8.98673e-23	up	K01115 phospholipase D1/2 [EC:3.1.4.4] | (RefSeq) phospholipase D alpha 2 (A)	BnaA01g28530D [Brassica napus]	RecName: Full=Phospholipase D alpha 2; Short=PLD 2; EC=3.1.4.4; AltName: Full=Choline phosphatase 2; AltName: Full=Phosphatidylcholine-hydrolyzing phospholipase D 2; Flags: Precursor;	SubName: Full=BnaA01g28530D protein {ECO:0000313|EMBL:CDY20149.1};	Phospholipase D1	GO:0005737,cytoplasm; GO:0016020,membrane; GO:0005509,calcium ion binding; GO:0070290,N-acylphosphatidylethanolamine-specific phospholipase D activity; GO:0004630,phospholipase D activity; GO:0016042,lipid catabolic process; GO:0046470,phosphatidylcholine metabolic process	PLD-like domain
BnaA01g28630D	6.41	4.66	5.7	1.56	2.01	1.64	1.786	1.38509e-11	up	K02295 cryptochrome | (RefSeq) (6-4)DNA photolyase (A)	BnaA01g28630D [Brassica napus]	RecName: Full=(6-4)DNA photolyase; EC=4.1.99.13; AltName: Full=Protein UV repair defective 3;	SubName: Full=BnaA01g28630D protein {ECO:0000313|EMBL:CDY20139.1};	Deoxyribodipyrimidine photolyase/cryptochrome	GO:0003914,DNA (6-4) photolyase activity; GO:0003677,DNA binding; GO:0000166,nucleotide binding; GO:0006281,DNA repair; GO:0009411,response to UV	DNA photolyase
BnaA01g28670D	2.54	4.15	5.99	13.22	7.91	18.57	-1.541	9.71447e-05	down	K14484 auxin-responsive protein IAA | (RefSeq) auxin-responsive protein IAA19 (A)	PREDICTED: auxin-responsive protein IAA19 [Brassica rapa]	RecName: Full=Auxin-responsive protein IAA19; AltName: Full=Indoleacetic acid-induced protein 19; AltName: Full=Protein MASSUGU 2;	RecName: Full=Auxin-responsive protein {ECO:0000256|RuleBase:RU004549};	--	GO:0005634,nucleus; GO:0003700,DNA-binding transcription factor activity; GO:0009734,auxin-activated signaling pathway; GO:0009733,response to auxin; GO:0080086,stamen filament development; GO:0006351,transcription, DNA-templated	AUX/IAA family
BnaA01g28710D	6.84	7.91	3.52	21.27	10.41	20.54	-1.401	2.90066e-05	down	K00521 ferric-chelate reductase [EC:1.16.1.7] | (RefSeq) ferric reduction oxidase 7, chloroplastic-like (A)	BnaA01g28710D [Brassica napus]	RecName: Full=NAC transcription factor 56 {ECO:0000303|PubMed:15029955}; Short=AtNAC056 {ECO:0000303|PubMed:15029955}; AltName: Full=NAC domain-containing protein 2 {ECO:0000303|PubMed:11245578}; Short=AtNAC2 {ECO:0000303|PubMed:11245578}; AltName: Full=Protein NAC-REGULATED SEED MORPHOLOGY 1 {ECO:0000303|PubMed:18849494};	SubName: Full=BnaA01g28710D protein {ECO:0000313|EMBL:CDY20131.1};	--	GO:0005634,nucleus; GO:0003700,DNA-binding transcription factor activity; GO:0044212,transcription regulatory region DNA binding; GO:0080060,integument development; GO:0045995,regulation of embryonic development; GO:0009753,response to jasmonic acid; GO:0048317,seed morphogenesis; GO:0006351,transcription, DNA-templated	No apical meristem (NAM) protein
BnaA01g28790D	23.44	16.65	20.59	2.89	3.02	4.06	2.703	2.89884e-36	up	K20891 beta-glucuronosyltransferase [EC:2.4.1.-] | (RefSeq) beta-glucuronosyltransferase GlcAT14A-like (A)	BnaA01g28790D [Brassica napus]	RecName: Full=Beta-glucuronosyltransferase GlcAT14A {ECO:0000305}; EC=2.4.1.- {ECO:0000305}; AltName: Full=GT14 family glucuronic acid transferase 1 {ECO:0000305}; Short=AtGlcAT14A {ECO:0000303|PubMed:24128328};	SubName: Full=BnaA01g28790D protein {ECO:0000313|EMBL:CDY20123.1};	Branching enzyme	GO:0005794,Golgi apparatus; GO:0000139,Golgi membrane; GO:0016021,integral component of membrane; GO:0008375,acetylglucosaminyltransferase activity; GO:0015020,glucuronosyltransferase activity; GO:0009826,unidimensional cell growth	Core-2/I-Branching enzyme
BnaA01g28800D	15.41	10.61	12.21	2.47	1.41	2.19	2.762	1.64874e-30	up	K10143 E3 ubiquitin-protein ligase RFWD2 [EC:2.3.2.27] | (RefSeq) protein SPA1-RELATED 3-like (A)	BnaA01g28800D [Brassica napus]	RecName: Full=Protein SPA1-RELATED 3;	SubName: Full=BnaA01g28800D protein {ECO:0000313|EMBL:CDY20122.1};	--	GO:0005634,nucleus; GO:0005524,ATP binding; GO:0042802,identical protein binding; GO:0004672,protein kinase activity; GO:0009585,red, far-red light phototransduction	Protein tyrosine kinase
BnaA01g28810D	2.47	3.08	2.97	133.55	110.59	128.04	-5.347	4.31052e-215	down	K04733 interleukin-1 receptor-associated kinase 4 [EC:2.7.11.1] | (RefSeq) L-type lectin-domain containing receptor kinase VII.1 (A)	BnaA01g28810D [Brassica napus]	RecName: Full=Lectin-like protein At3g16530; Flags: Precursor;	SubName: Full=BnaA01g28810D protein {ECO:0000313|EMBL:CDY20121.1};	--	GO:0048046,apoplast; GO:0005618,cell wall; GO:0005634,nucleus; GO:0009505,plant-type cell wall; GO:0030246,carbohydrate binding; GO:0010200,response to chitin; GO:0002239,response to oomycetes	Legume lectin domain
BnaA01g28830D	7.02	5.73	7.07	20.19	17.42	22.71	-1.503	5.72034e-13	down	--	PREDICTED: uncharacterized protein LOC103840829 [Brassica rapa]	--	SubName: Full=Uncharacterized protein {ECO:0000313|EnsemblPlants:Bra021103.1-P};	--	--	--
BnaA01g28900D	17.18	18.01	24.29	106.53	140.26	68.73	-2.321	4.14219e-18	down	K13783 MFS transporter, OPA family, solute carrier family 37 (glycerol-3-phosphate transporter), member 1/2 | (RefSeq) putative glycerol-3-phosphate transporter 4 (A)	BnaA01g28900D [Brassica napus]	RecName: Full=Stem-specific protein TSJT1;	SubName: Full=BnaA01g28900D protein {ECO:0000313|EMBL:CDY20112.1};	--	--	Glutamine amidotransferase domain
BnaA01g29060D	1.08	1.39	3.04	6.44	4.11	6.06	-1.488	0.000363073	down	K09699 2-oxoisovalerate dehydrogenase E2 component (dihydrolipoyl transacylase) [EC:2.3.1.168] | (RefSeq) multiple organellar RNA editing factor 3, mitochondrial-like (A)	multiple organellar RNA editing factor 8, chloroplastic/mitochondrial-like [Brassica napus]	RecName: Full=Multiple organellar RNA editing factor 8, chloroplastic/mitochondrial {ECO:0000305}; AltName: Full=RNA editing-interacting protein 1 {ECO:0000303|PubMed:22566615}; Flags: Precursor;	SubName: Full=BnaA01g29060D protein {ECO:0000313|EMBL:CDY20096.1};	--	GO:0009507,chloroplast; GO:0005739,mitochondrion; GO:0050897,cobalt ion binding; GO:0016554,cytidine to uridine editing; GO:0080156,mitochondrial mRNA modification; GO:0006397,mRNA processing; GO:0009451,RNA modification	--
BnaA01g29070D	1.06	0.94	1.99	0.04	0	0.06	5.325	8.39567e-12	up	K09527 DnaJ homolog subfamily C member 7 | (RefSeq) TPR repeat-containing thioredoxin TTL1-like (A)	BnaA01g29070D [Brassica napus]	RecName: Full=TPR repeat-containing thioredoxin TTL2; AltName: Full=Tetratricopeptide repeat thioredoxin-like 2;	SubName: Full=BnaA01g29070D protein {ECO:0000313|EMBL:CDY20095.1};	FOG: TPR repeat	GO:0005623,cell; GO:0045454,cell redox homeostasis	SMODS and SLOG-associating 2TM effector domain family 5
BnaA01g29130D	12.11	10.32	3.44	3.27	3.81	5.46	1.151	0.00800865	up	K16573 gamma-tubulin complex component 6 | (RefSeq) uncharacterized LOC103722329 (A)	protein trichome birefringence-like 41 [Brassica napus]	RecName: Full=Protein trichome birefringence-like 41;	SubName: Full=BnaA01g29130D protein {ECO:0000313|EMBL:CDY20089.1};	--	GO:0005794,Golgi apparatus; GO:0016021,integral component of membrane; GO:0016413,O-acetyltransferase activity; GO:0071554,cell wall organization or biogenesis	PMR5 N terminal Domain
BnaA01g29140D	13.05	15.74	14.38	92.73	80	86.3	-2.484	7.28041e-102	down	K04733 interleukin-1 receptor-associated kinase 4 [EC:2.7.11.1] | (RefSeq) probable leucine-rich repeat receptor-like serine/threonine-protein kinase At3g14840 (A)	BnaA01g29140D [Brassica napus]	RecName: Full=Probable leucine-rich repeat receptor-like serine/threonine-protein kinase At3g14840; EC=2.7.11.1; Flags: Precursor;	SubName: Full=BnaA01g29140D protein {ECO:0000313|EMBL:CDY20088.1};	--	GO:0016021,integral component of membrane; GO:0005886,plasma membrane; GO:0009506,plasmodesma; GO:0005524,ATP binding; GO:0004674,protein serine/threonine kinase activity; GO:0009861,jasmonic acid and ethylene-dependent systemic resistance; GO:0045088,regulation of innate immune response	Fungal protein kinase
BnaA01g29190D	2.92	2.16	2.29	1.77	0.68	1.07	1.18	0.013543	up	K15382 solute carrier family 50 (sugar transporter) | (RefSeq) bidirectional sugar transporter SWEET2-like isoform X1 (A)	BnaA01g29190D [Brassica napus]	RecName: Full=Bidirectional sugar transporter SWEET2 {ECO:0000303|PubMed:21107422}; Short=AtSWEET2 {ECO:0000303|PubMed:21107422}; AltName: Full=Protein SUGARS WILL EVENTUALLY BE EXPORTED TRANSPORTERS 2 {ECO:0000303|PubMed:21107422};	RecName: Full=Bidirectional sugar transporter SWEET {ECO:0000256|RuleBase:RU910715};	Multitransmembrane protein	GO:0016021,integral component of membrane; GO:0005887,integral component of plasma membrane; GO:0051119,sugar transmembrane transporter activity; GO:0008643,carbohydrate transport	Sugar efflux transporter for intercellular exchange
BnaA01g29260D	15.04	14.5	14.73	4.37	3.92	4.37	1.907	7.89513e-33	up	K07425 long-chain fatty acid omega-monooxygenase [EC:1.14.14.80] | (RefSeq) cytochrome P450 CYP72A219-like (A)	cytochrome P450 72A15-like isoform X2 [Brassica napus]	RecName: Full=Cytochrome P450 72A15; EC=1.14.-.-;	SubName: Full=BnaA01g29260D protein {ECO:0000313|EMBL:CDY20076.1};	Cytochrome P450 CYP4/CYP19/CYP26 subfamilies	GO:0016021,integral component of membrane; GO:0020037,heme binding; GO:0005506,iron ion binding; GO:0004497,monooxygenase activity; GO:0016705,oxidoreductase activity, acting on paired donors, with incorporation or reduction of molecular oxygen	Cytochrome P450
BnaA01g29290D	2.01	1.38	1.68	0.49	0.26	1.07	1.581	0.00196376	up	K01652 acetolactate synthase I/II/III large subunit [EC:2.2.1.6] | (RefSeq) uncharacterized LOC101253806 (A)	BnaA01g29290D [Brassica napus]	RecName: Full=C2 domain-containing protein At1g53590; AltName: Full=N-terminal-TM-C2 domain type 6 protein 1; Short=NTMC2TYPE6.1;	SubName: Full=BnaA01g29290D protein {ECO:0000313|EMBL:CDY20073.1};	Ca2+-dependent lipid-binding protein CLB1/vesicle protein vp115/Granuphilin A, contains C2 domain	GO:0005783,endoplasmic reticulum; GO:0016021,integral component of membrane; GO:0005886,plasma membrane; GO:0005773,vacuole; GO:0008289,lipid binding; GO:0006869,lipid transport	Synaptotagmin-like mitochondrial-lipid-binding domain
BnaA01g29540D	0.3	1.03	0.14	2.42	6.29	9.5	-3.539	2.34083e-05	down	--	BnaA01g29540D [Brassica napus]	RecName: Full=Dormancy-associated protein homolog 4 {ECO:0000305}; AltName: Full=DRM1 homolog 4 {ECO:0000305};	SubName: Full=BnaA01g29540D protein {ECO:0000313|EMBL:CDY39102.1};	--	--	Dormancy/auxin associated protein
BnaA01g29640D	2.38	2.49	2.17	0.57	0.56	0.62	2.106	0.00384525	up	--	PREDICTED: uncharacterized protein LOC103842334 [Brassica rapa]	--	SubName: Full=Uncharacterized protein {ECO:0000313|EnsemblPlants:Bra021528.1-P};	--	--	--
BnaA01g29650D	15.66	12.06	9.69	6.4	3.62	6.57	1.282	1.27776e-05	up	K08064 nuclear transcription factor Y, alpha | (RefSeq) nuclear transcription factor Y subunit A-6 (A)	PREDICTED: nuclear transcription factor Y subunit A-6 isoform X1 [Brassica rapa]	RecName: Full=Nuclear transcription factor Y subunit A-6; Short=AtNF-YA-6;	SubName: Full=Uncharacterized protein {ECO:0000313|EnsemblPlants:Bra021527.1-P};	CCAAT-binding factor, subunit B (HAP2)	GO:0016602,CCAAT-binding factor complex; GO:0003677,DNA binding; GO:0003700,DNA-binding transcription factor activity; GO:0009793,embryo development ending in seed dormancy; GO:0048316,seed development; GO:0010262,somatic embryogenesis; GO:0006351,transcription, DNA-templated	CCAAT-binding transcription factor (CBF-B/NF-YA) subunit B
BnaA01g30060D	2.28	2.62	1.51	0.6	0.62	0.58	1.936	1.09339e-09	up	K05666 ATP-binding cassette, subfamily C (CFTR/MRP), member 2 | (RefSeq) ABC transporter C family member 3 (A)	BnaA01g30060D [Brassica napus]	RecName: Full=ABC transporter C family member 3; Short=ABC transporter ABCC.3; Short=AtABCC3; EC=3.6.3.44; AltName: Full=ATP-energized glutathione S-conjugate pump 3; AltName: Full=Glutathione S-conjugate-transporting ATPase 3; AltName: Full=Multidrug resistance-associated protein 3;	SubName: Full=BnaA01g30060D protein {ECO:0000313|EMBL:CDY43375.1};	Multidrug resistance-associated protein/mitoxantrone resistance protein, ABC superfamily	GO:0048046,apoplast; GO:0016021,integral component of membrane; GO:0000325,plant-type vacuole; GO:0009506,plasmodesma; GO:0005774,vacuolar membrane; GO:0005773,vacuole; GO:0005524,ATP binding; GO:0042626,ATPase activity, coupled to transmembrane movement of substances; GO:0010290,chlorophyll catabolite transmembrane transporter activity; GO:0015431,glutathione S-conjugate-exporting ATPase activit…	FtsK/SpoIIIE family
BnaA01g30410D	1.94	3.45	2.77	8.79	7.53	8.06	-1.477	1.01958e-09	down	K01937 CTP synthase [EC:6.3.4.2] | (RefSeq) CTP synthase (A)	CTP synthase [Brassica napus]	--	RecName: Full=CTP synthase {ECO:0000256|RuleBase:RU810713}; EC=6.3.4.2 {ECO:0000256|RuleBase:RU810713}; AltName: Full=UTP--ammonia ligase {ECO:0000256|RuleBase:RU810713};	CTP synthase (UTP-ammonia lyase)	--	Peptidase C26
BnaA01g30490D	4.65	6.19	1.55	0.8	0.38	0.22	3.27	9.04298e-09	up	K03283 heat shock 70kDa protein 1/2/6/8 | (RefSeq) probable mediator of RNA polymerase II transcription subunit 37c (A)	BnaA01g30490D [Brassica napus]	RecName: Full=Probable mediator of RNA polymerase II transcription subunit 37c; AltName: Full=Heat shock 70 kDa protein 4; AltName: Full=Heat shock cognate 70 kDa protein 4; AltName: Full=Heat shock cognate protein 70-4; Short=AtHsc70-4; AltName: Full=Heat shock protein 70-4; Short=AtHsp70-4;	SubName: Full=BnaA01g30490D protein {ECO:0000313|EMBL:CDY50531.1};	Molecular chaperones HSP70/HSC70, HSP70 superfamily	GO:0048046,apoplast; GO:0005618,cell wall; GO:0005829,cytosol; GO:0005794,Golgi apparatus; GO:0005739,mitochondrion; GO:0005634,nucleus; GO:0005886,plasma membrane; GO:0005774,vacuolar membrane; GO:0005524,ATP binding; GO:0031625,ubiquitin protein ligase binding; GO:0016567,protein ubiquitination; GO:0006355,regulation of transcription, DNA-templated; GO:0009617,response to bacterium; GO:0046686,…	MreB/Mbl protein
BnaA01g30950D	6.01	6.19	6.39	3.84	2.96	2.49	1.109	0.000232331	up	--	BnaA01g30950D [Brassica napus]	RecName: Full=GDSL esterase/lipase CPRD49; EC=3.1.1.-; AltName: Full=Extracellular lipase CPRD49; Flags: Precursor;	SubName: Full=BnaA01g30950D protein {ECO:0000313|EMBL:CDY36323.1};	Isoamyl acetate-hydrolyzing esterase	GO:0048046,apoplast; GO:0016787,hydrolase activity; GO:0016042,lipid catabolic process	SGNH hydrolase-like domain, acetyltransferase AlgX
BnaA01g31120D	16.09	15.39	16.61	8.57	8.24	6.78	1.13	9.13732e-11	up	--	GDSL esterase/lipase CPRD49 [Brassica napus]	RecName: Full=GDSL esterase/lipase CPRD49; EC=3.1.1.-; AltName: Full=Extracellular lipase CPRD49; Flags: Precursor;	SubName: Full=BnaA01g31120D protein {ECO:0000313|EMBL:CDY36306.1};	Isoamyl acetate-hydrolyzing esterase	GO:0048046,apoplast; GO:0016787,hydrolase activity; GO:0016042,lipid catabolic process	SGNH hydrolase-like domain, acetyltransferase AlgX
BnaA01g31200D	1.14	0.45	0.52	1.94	2.38	1.57	-1.378	0.00679922	down	K01227 mannosyl-glycoprotein endo-beta-N-acetylglucosaminidase [EC:3.2.1.96] | (RefSeq) cytosolic endo-beta-N-acetylglucosaminidase 2-like isoform X1 (A)	BnaA01g31200D [Brassica napus]	RecName: Full=Cytosolic endo-beta-N-acetylglucosaminidase 2 {ECO:0000305}; Short=ENGase 2 {ECO:0000305}; EC=3.2.1.96 {ECO:0000269|PubMed:21597164, ECO:0000269|PubMed:21796445}; AltName: Full=Endo-beta-N-acetyglucosaminidase 85B {ECO:0000303|PubMed:21796445}; Short=AtENGase85B {ECO:0000303|PubMed:21796445};	SubName: Full=BnaA01g31200D protein {ECO:0000313|EMBL:CDY36298.1};	Predicted glycosylhydrolase	GO:0005737,cytoplasm; GO:0005829,cytosol; GO:0033925,mannosyl-glycoprotein endo-beta-N-acetylglucosaminidase activity; GO:0006491,N-glycan processing; GO:0006517,protein deglycosylation	--
BnaA01g31270D	1.13	1.54	1.32	1.95	4.59	2.24	-1.053	0.00999804	down	K19613 leucine-rich repeat protein SHOC2 | (RefSeq) receptor-like protein 12 (A)	BnaA01g31270D [Brassica napus]	RecName: Full=Receptor-like protein 19 {ECO:0000303|PubMed:18434605}; Short=AtRLP19 {ECO:0000303|PubMed:18434605}; Flags: Precursor;	SubName: Full=BnaA01g31270D protein {ECO:0000313|EMBL:CDY36291.1};	FOG: Leucine rich repeat	GO:0016021,integral component of membrane	Leucine Rich repeat
BnaA01g31320D	22.25	20.16	19.86	75.14	39.45	51.15	-1.304	1.06768e-08	down	--	hypothetical protein EUTSA_v10022397mg, partial [Eutrema salsugineum]	RecName: Full=Senescence associated gene 20 {ECO:0000303|PubMed:10444084}; AltName: Full=Protein WOUND-INDUCED 12 {ECO:0000303|PubMed:12857840}; Short=AtWI-12 {ECO:0000303|PubMed:12857840};	SubName: Full=Uncharacterized protein {ECO:0000313|EMBL:ESQ48935.1}; Flags: Fragment;	--	GO:0007568,aging; GO:0010150,leaf senescence; GO:0009620,response to fungus; GO:0002238,response to molecule of fungal origin; GO:0009624,response to nematode; GO:0010193,response to ozone	--
BnaA01g31370D	5.66	2.79	2.44	1.36	0.79	1.73	1.592	0.00320952	up	K19040 E3 ubiquitin-protein ligase ATL10/75/76/77/78 [EC:2.3.2.27] | (RefSeq) RING-H2 finger protein ATL73 (A)	RING-H2 finger protein ATL72-like [Brassica napus]	RecName: Full=RING-H2 finger protein ATL72; EC=2.3.2.27 {ECO:0000305}; AltName: Full=RING-type E3 ubiquitin transferase ATL72 {ECO:0000305};	SubName: Full=BnaA01g31370D protein {ECO:0000313|EMBL:CDY36281.1};	FOG: Predicted E3 ubiquitin ligase	GO:0016021,integral component of membrane; GO:0046872,metal ion binding; GO:0061630,ubiquitin protein ligase activity; GO:0043161,proteasome-mediated ubiquitin-dependent protein catabolic process	Zinc-ribbon, C4HC2 type
BnaA01g31480D	0.66	0.6	0.99	68.85	67.67	64.19	-6.38	3.5208e-201	down	K01051 pectinesterase [EC:3.1.1.11] | (RefSeq) LOW QUALITY PROTEIN: probable pectinesterase/pectinesterase inhibitor 25 (A)	probable pectinesterase/pectinesterase inhibitor 25 isoform X3 [Brassica napus]	RecName: Full=Probable pectinesterase/pectinesterase inhibitor 25; Includes: RecName: Full=Pectinesterase inhibitor 25; AltName: Full=Pectin methylesterase inhibitor 25; Includes: RecName: Full=Pectinesterase 25; Short=PE 25; EC=3.1.1.11; AltName: Full=Pectin methylesterase 25; Short=AtPME25; Flags: Precursor;	RecName: Full=Pectinesterase {ECO:0000256|RuleBase:RU000589}; EC=3.1.1.11 {ECO:0000256|RuleBase:RU000589};	--	GO:0071944,cell periphery; GO:0005618,cell wall; GO:0005576,extracellular region; GO:0045330,aspartyl esterase activity; GO:0030599,pectinesterase activity; GO:0046910,pectinesterase inhibitor activity; GO:0042545,cell wall modification; GO:0045490,pectin catabolic process	Plant invertase/pectin methylesterase inhibitor
BnaA01g31610D	1.72	3.01	3.24	9.11	5.77	8.41	-1.444	3.41763e-07	down	K14768 U3 small nucleolar RNA-associated protein 7 | (RefSeq) probable U3 small nucleolar RNA-associated protein 7 isoform X2 (A)	BnaA01g31610D [Brassica napus]	RecName: Full=Pre-mRNA-processing factor 19 homolog 2 {ECO:0000305}; EC=2.3.2.27 {ECO:0000269|PubMed:18393940}; AltName: Full=MOS4-associated complex protein 3B; Short=MAC protein 3B; AltName: Full=Plant U-box protein 60; AltName: Full=RING-type E3 ubiquitin transferase PRP19 2 {ECO:0000305}; AltName: Full=U-box domain-containing protein 60;	SubName: Full=BnaA01g31610D protein {ECO:0000313|EMBL:CDY41358.1};	WD40-repeat-containing subunit of the 18S rRNA processing complex	GO:0005618,cell wall; GO:0009507,chloroplast; GO:0080008,Cul4-RING E3 ubiquitin ligase complex; GO:0005634,nucleus; GO:0000974,Prp19 complex; GO:0071006,U2-type catalytic step 1 spliceosome; GO:0061630,ubiquitin protein ligase activity; GO:0004842,ubiquitin-protein transferase activity; GO:0042742,defense response to bacterium; GO:0006281,DNA repair; GO:0000349,generation of catalytic spliceosome…	Cytochrome D1 heme domain
BnaA01g31850D	82.98	68.55	102.26	29.74	30.66	27.26	1.631	1.03677e-20	up	K13448 calcium-binding protein CML | (RefSeq) probable calcium-binding protein CML49 (A)	BnaA01g31850D [Brassica napus]	RecName: Full=Probable calcium-binding protein CML49; AltName: Full=Calmodulin-like protein 49;	SubName: Full=BnaA01g31850D protein {ECO:0000313|EMBL:CDY41334.1};	Ca2+-binding protein, EF-Hand protein superfamily	GO:0005737,cytoplasm; GO:0005509,calcium ion binding; GO:0004198,calcium-dependent cysteine-type endopeptidase activity; GO:0006508,proteolysis	EF-hand domain pair
BnaA01g31950D	41.23	32.99	31.13	0.33	5.38	1.63	3.912	6.08079e-05	up	K03860 phosphatidylinositol glycan, class Q | (RefSeq) N-acetylglucosaminyl-phosphatidylinositol biosynthetic protein gpi1-like (A)	PREDICTED: gibberellin-regulated protein 13-like [Brassica rapa]	RecName: Full=Protein GAST1; Flags: Precursor;	SubName: Full=BnaA01g31950D protein {ECO:0000313|EMBL:CDY41324.1};	--	GO:0005576,extracellular region	Gibberellin regulated protein
BnaA01g32110D	5.68	7.07	8.98	20.94	17.85	21.15	-1.364	1.04719e-12	down	K14779 ATP-dependent RNA helicase DDX52/ROK1 [EC:3.6.4.13] | (RefSeq) DEAD-box ATP-dependent RNA helicase 57 (A)	BnaA01g32110D [Brassica napus]	RecName: Full=DEAD-box ATP-dependent RNA helicase 57; EC=3.6.4.13;	SubName: Full=BnaA01g32110D protein {ECO:0000313|EMBL:CDY41308.1};	ATP-dependent RNA helicase	GO:0005737,cytoplasm; GO:0005730,nucleolus; GO:0005524,ATP binding; GO:0004004,ATP-dependent RNA helicase activity; GO:0003723,RNA binding; GO:0010501,RNA secondary structure unwinding; GO:0006364,rRNA processing	Type III restriction enzyme, res subunit
BnaA01g32130D	7.45	6.17	4.86	1.93	2.91	2.96	1.34	1.83722e-07	up	K19613 leucine-rich repeat protein SHOC2 | (RefSeq) disease resistance protein TAO1-like (A)	disease resistance protein RPS6 [Brassica napus]	RecName: Full=Disease resistance protein RPS6 {ECO:0000303|PubMed:19525323}; AltName: Full=Resistance to Pseudomonas syringae 6 {ECO:0000303|PubMed:19525323};	SubName: Full=BnaA01g32130D protein {ECO:0000313|EMBL:CDY41306.1};	--	GO:0043531,ADP binding; GO:0006952,defense response; GO:0007165,signal transduction	AAA ATPase domain
BnaA01g32250D	3.71	4.18	6.57	2.22	2.68	2.44	1.074	0.0001349	up	K04733 interleukin-1 receptor-associated kinase 4 [EC:2.7.11.1] | (RefSeq) lectin-domain containing receptor kinase VI.3-like (A)	BnaA01g32250D [Brassica napus]	RecName: Full=Probable L-type lectin-domain containing receptor kinase VI.1; Short=LecRK-VI.1; EC=2.7.11.1; Flags: Precursor;	SubName: Full=BnaA01g32250D protein {ECO:0000313|EMBL:CDY58654.1};	--	GO:0016021,integral component of membrane; GO:0005886,plasma membrane; GO:0005524,ATP binding; GO:0030246,carbohydrate binding; GO:0004674,protein serine/threonine kinase activity	Protein tyrosine kinase
BnaA01g32300D	0.39	0.35	0.42	1.93	0.87	1.03	-1.604	0.00429147	down	K04688 ribosomal protein S6 kinase beta [EC:2.7.11.1] | (RefSeq) serine/threonine-protein kinase AtPK2/AtPK19-like (A)	BnaA01g32300D [Brassica napus]	RecName: Full=Serine/threonine-protein kinase AtPK2/AtPK19; EC=2.7.11.1; AltName: Full=Ribosomal-protein S6 kinase homolog 2;	SubName: Full=BnaA01g32300D protein {ECO:0000313|EMBL:CDY58648.1};	Ribosomal protein S6 kinase and related proteins	GO:0005737,cytoplasm; GO:0005634,nucleus; GO:0005524,ATP binding; GO:0016301,kinase activity; GO:0004672,protein kinase activity; GO:0004674,protein serine/threonine kinase activity; GO:0035556,intracellular signal transduction; GO:0045727,positive regulation of translation; GO:0006468,protein phosphorylation; GO:0009409,response to cold; GO:0009408,response to heat; GO:0009651,response to salt s…	Haspin like kinase domain
BnaA01g32340D	8.35	7.07	24.35	4.41	4.87	5.21	1.55	0.000388386	up	--	BnaA01g32340D [Brassica napus]	RecName: Full=Auxin-induced in root cultures protein 12; Flags: Precursor;	SubName: Full=BnaA01g32340D protein {ECO:0000313|EMBL:CDY34903.1};	Predicted membrane protein, contains DoH and Cytochrome b-561/ferric reductase transmembrane domains	GO:0031225,anchored component of membrane; GO:0005886,plasma membrane; GO:0046872,metal ion binding; GO:0009734,auxin-activated signaling pathway; GO:0055114,oxidation-reduction process	Protein of unknown function (DUF568)
BnaA01g32380D	0.8	0.75	1.34	2.48	1.9	1.99	-1.037	0.00273575	down	K17964 leucine-rich PPR motif-containing protein, mitochondrial | (RefSeq) hypothetical protein (A)	BnaA01g32380D [Brassica napus]	RecName: Full=Pentatricopeptide repeat-containing protein At3g07290, mitochondrial; Flags: Precursor;	SubName: Full=BnaA01g32380D protein {ECO:0000313|EMBL:CDY34907.1};	FOG: PPR repeat	GO:0043231,intracellular membrane-bounded organelle; GO:0005739,mitochondrion; GO:0004519,endonuclease activity; GO:0003723,RNA binding; GO:0009451,RNA modification	Sensor_kinase_SpoOB-type, alpha-helical domain
BnaA01g32640D	3.96	3.16	3.77	1.92	1.27	2.49	1.039	0.00766193	up	K21630 GATA-type zinc finger protein 1 | (RefSeq) putative GATA transcription factor 22 (A)	BnaA01g32640D [Brassica napus]	RecName: Full=GATA transcription factor 15;	SubName: Full=BnaA01g32640D protein {ECO:0000313|EMBL:CDY34933.1};	GATA-4/5/6 transcription factors	GO:0005634,nucleus; GO:0005667,transcription factor complex; GO:0003682,chromatin binding; GO:0003700,DNA-binding transcription factor activity; GO:0000977,RNA polymerase II regulatory region sequence-specific DNA binding; GO:0001085,RNA polymerase II transcription factor binding; GO:0001228,DNA-binding transcription activator activity, RNA polymerase II-specific; GO:0008270,zinc ion binding; GO:…	GATA zinc finger
BnaA01g33420D	1.04	0.17	0.38	2.03	2.05	2.83	-2.013	0.001106	down	K14484 auxin-responsive protein IAA | (RefSeq) auxin-responsive protein IAA16-like (A)	PREDICTED: auxin-responsive protein IAA16-like [Brassica rapa]	RecName: Full=Auxin-responsive protein IAA16; AltName: Full=Indoleacetic acid-induced protein 16;	RecName: Full=Auxin-responsive protein {ECO:0000256|RuleBase:RU004549};	--	GO:0005634,nucleus; GO:0003700,DNA-binding transcription factor activity; GO:0009734,auxin-activated signaling pathway; GO:0009733,response to auxin; GO:0006351,transcription, DNA-templated	AUX/IAA family
BnaA01g33800D	6.3	2.31	1.1	0.49	1.39	0.66	2.036	0.00398158	up	K00059 3-oxoacyl-[acyl-carrier protein] reductase [EC:1.1.1.100] | (RefSeq) NADPH-dependent aldehyde reductase-like protein, chloroplastic (A)	BnaA01g33800D [Brassica napus]	RecName: Full=NADPH-dependent aldehyde reductase-like protein, chloroplastic {ECO:0000250|UniProtKB:Q9SQR2}; EC=1.1.1.- {ECO:0000250|UniProtKB:Q9SQR2}; Flags: Precursor;	SubName: Full=BnaA01g33800D protein {ECO:0000313|EMBL:CDY21149.1};	Reductases with broad range of substrate specificities	GO:0009507,chloroplast; GO:0016491,oxidoreductase activity	KR domain
BnaA01g34300D	1.73	0.15	1.01	0.08	0.31	0.17	2.471	0.00876606	up	K01601 ribulose-bisphosphate carboxylase large chain [EC:4.1.1.39] | (RefSeq) rbcL, BRNAC_p029; ribulose-1,5-bisphosphate carboxylase/oxygenase large subunit (A)	BnaA01g34300D [Brassica napus]	RecName: Full=Ribulose bisphosphate carboxylase large chain {ECO:0000255|HAMAP-Rule:MF_01338}; Short=RuBisCO large subunit {ECO:0000255|HAMAP-Rule:MF_01338}; EC=4.1.1.39 {ECO:0000255|HAMAP-Rule:MF_01338}; Flags: Precursor;	SubName: Full=BnaA01g34300D protein {ECO:0000313|EMBL:CDY21199.1};	--	GO:0009507,chloroplast; GO:0000287,magnesium ion binding; GO:0004497,monooxygenase activity; GO:0016984,ribulose-bisphosphate carboxylase activity; GO:0009853,photorespiration; GO:0019253,reductive pentose-phosphate cycle	Ribulose bisphosphate carboxylase large chain, N-terminal domain
BnaA01g34490D	39.87	37.34	35.99	11.47	20.57	14.52	1.373	1.55414e-09	up	K14863 ribosome biogenesis protein YTM1 | (RefSeq) ribosome biogenesis protein wdr12 (A)	BnaA01g34490D [Brassica napus]	RecName: Full=Pheophytinase, chloroplastic; EC=3.1.1.-; AltName: Full=Pheophytin pheophorbide hydrolase; AltName: Full=Protein CO-REGULATED WITH NYE1; Flags: Precursor;	SubName: Full=BnaA01g34490D protein {ECO:0000313|EMBL:CDY64604.1};	Predicted hydrolase/acyltransferase (alpha/beta hydrolase superfamily)	GO:0009507,chloroplast; GO:0009570,chloroplast stroma; GO:0009535,chloroplast thylakoid membrane; GO:0080124,pheophytinase activity; GO:0015996,chlorophyll catabolic process	Serine hydrolase
BnaA01g34520D	0.65	0.45	0.39	2.37	1.89	2.46	-2.072	1.33072e-07	down	K17681 ATPase family AAA domain-containing protein 3A/B | (RefSeq) ATPase family AAA domain-containing protein 3C-like (A)	BnaA01g34520D [Brassica napus]	RecName: Full=Cell division control protein 48 homolog D; Short=AtCDC48d; AltName: Full=Transitional endoplasmic reticulum ATPase D;	SubName: Full=BnaA01g34520D protein {ECO:0000313|EMBL:CDY64607.1};	AAA+-type ATPase	GO:0005856,cytoskeleton; GO:0005829,cytosol; GO:0005794,Golgi apparatus; GO:0005730,nucleolus; GO:0005654,nucleoplasm; GO:0009524,phragmoplast; GO:0005886,plasma membrane; GO:0005524,ATP binding; GO:0016787,hydrolase activity; GO:0007049,cell cycle; GO:0051301,cell division; GO:0045732,positive regulation of protein catabolic process; GO:0015031,protein transport; GO:0046686,response to cadmium i…	AAA+ lid domain
BnaA01g34560D	2.78	2.24	1.28	0.71	0.95	0.79	1.467	0.00685661	up	K14498 serine/threonine-protein kinase SRK2 [EC:2.7.11.1] | (RefSeq) serine/threonine-protein kinase SRK2F (A)	BnaA01g34560D [Brassica napus]	RecName: Full=Serine/threonine-protein kinase SRK2F; EC=2.7.11.1; AltName: Full=OST1-kinase-like 5; AltName: Full=SNF1-related kinase 2.7; Short=SnRK2.7;	SubName: Full=BnaA01g34560D protein {ECO:0000313|EMBL:CDY68254.1};	Serine/threonine protein kinase	GO:0005737,cytoplasm; GO:0005829,cytosol; GO:0005634,nucleus; GO:0005524,ATP binding; GO:0016301,kinase activity; GO:0004674,protein serine/threonine kinase activity; GO:0035556,intracellular signal transduction; GO:0006468,protein phosphorylation; GO:0006970,response to osmotic stress; GO:0009651,response to salt stress	Protein tyrosine kinase
BnaA01g34570D	2.39	2.38	2.74	5.28	5.66	6.25	-1.096	7.9979e-08	down	K15334 multisite-specific tRNA:(cytosine-C5)-methyltransferase [EC:2.1.1.202] | (RefSeq) tRNA (cytosine(34)-C(5))-methyltransferase-like (A)	PREDICTED: tRNA (cytosine(34)-C(5))-methyltransferase [Brassica rapa]	--	SubName: Full=Uncharacterized protein {ECO:0000313|EnsemblPlants:Bra011816.1-P};	tRNA cytosine-5-methylases and related enzymes of the NOL1/NOP2/sun superfamily	--	16S rRNA methyltransferase RsmB/F
BnaA01g34610D	17.1	20.97	20.25	4.22	5.87	7.99	1.785	1.95523e-14	up	K11812 tryptophan N-monooxygenase [EC:1.14.13.125] | (RefSeq) cytochrome P450 79B1 (A)	cytochrome P450 [Brassica napus]	RecName: Full=Cytochrome P450 79B1; EC=1.14.-.-;	SubName: Full=BnaA01g34610D protein {ECO:0000313|EMBL:CDY63895.1}; SubName: Full=Cytochrome P450 {ECO:0000313|EMBL:AAN76810.1};	Cytochrome P450 CYP2 subfamily	GO:0016021,integral component of membrane; GO:0020037,heme binding; GO:0005506,iron ion binding; GO:0004497,monooxygenase activity; GO:0016705,oxidoreductase activity, acting on paired donors, with incorporation or reduction of molecular oxygen	Cytochrome P450
BnaA01g34620D	8.92	8.85	6.88	1.85	1.35	1.83	2.392	1.91721e-17	up	K00860 adenylylsulfate kinase [EC:2.7.1.25] | (RefSeq) adenylyl-sulfate kinase 2, chloroplastic (A)	adenylyl-sulfate kinase 2, chloroplastic [Brassica napus]	RecName: Full=Adenylyl-sulfate kinase 2, chloroplastic; EC=2.7.1.25; AltName: Full=ATP adenosine-5'-phosphosulfate 3'-phosphotransferase 2; AltName: Full=Adenosine-5'-phosphosulfate kinase 2; Short=APS kinase 2; Flags: Precursor;	RecName: Full=Adenylyl-sulfate kinase {ECO:0000256|RuleBase:RU004347}; EC=2.7.1.25 {ECO:0000256|RuleBase:RU004347};	Adenosine 5'-phosphosulfate kinase	GO:0009507,chloroplast; GO:0009536,plastid; GO:0004020,adenylylsulfate kinase activity; GO:0005524,ATP binding; GO:0019344,cysteine biosynthetic process; GO:0070814,hydrogen sulfide biosynthetic process; GO:0000103,sulfate assimilation	Chromatin associated protein KTI12
BnaA01g34710D	400.11	274.03	219.65	1.91	3.16	1.87	7.111	1.35992e-147	up	K01858 myo-inositol-1-phosphate synthase [EC:5.5.1.4] | (RefSeq) inositol-3-phosphate synthase (A)	BnaA01g34710D, partial [Brassica napus]	RecName: Full=Inositol-3-phosphate synthase; Short=MIP synthase; EC=5.5.1.4; AltName: Full=Myo-inositol 1-phosphate synthase; Short=IPS; Short=MI-1-P synthase;	SubName: Full=BnaA01g34710D protein {ECO:0000313|EMBL:CDY68048.1}; Flags: Fragment;	Myo-inositol-1-phosphate synthase	GO:0005737,cytoplasm; GO:0004512,inositol-3-phosphate synthase activity; GO:0006021,inositol biosynthetic process; GO:0008654,phospholipid biosynthetic process	Myo-inositol-1-phosphate synthase
BnaA01g34720D	21.8	28.26	26.82	116.71	172.42	126.86	-2.346	1.18037e-33	down	K01626 3-deoxy-7-phosphoheptulonate synthase [EC:2.5.1.54] | (RefSeq) phospho-2-dehydro-3-deoxyheptonate aldolase 1, chloroplastic-like (A)	BnaA01g34720D [Brassica napus]	RecName: Full=Phospho-2-dehydro-3-deoxyheptonate aldolase 1, chloroplastic; EC=2.5.1.54; AltName: Full=3-deoxy-D-arabino-heptulosonate 7-phosphate synthase 1; AltName: Full=DAHP synthase 1; AltName: Full=Phospho-2-keto-3-deoxyheptonate aldolase 1; Flags: Precursor;	RecName: Full=Phospho-2-dehydro-3-deoxyheptonate aldolase {ECO:0000256|RuleBase:RU363071}; EC=2.5.1.54 {ECO:0000256|RuleBase:RU363071};	--	GO:0009507,chloroplast; GO:0005739,mitochondrion; GO:0003849,3-deoxy-7-phosphoheptulonate synthase activity; GO:0009073,aromatic amino acid family biosynthetic process; GO:0009423,chorismate biosynthetic process; GO:0009611,response to wounding	Class-II DAHP synthetase family
BnaA01g34910D	10.02	3.66	32.42	2.25	0.61	1.75	3.431	0.000312924	up	K09286 EREBP-like factor | (RefSeq) ethylene-responsive transcription factor 6-like (A)	BnaA01g34910D [Brassica napus]	RecName: Full=Ethylene-responsive transcription factor 6; Short=AtERF6; AltName: Full=Ethylene-responsive element-binding factor 6; Short=EREBP-6;	SubName: Full=Uncharacterized protein {ECO:0000313|EnsemblPlants:Bra040158.1-P};	--	GO:0005634,nucleus; GO:0003677,DNA binding; GO:0003700,DNA-binding transcription factor activity; GO:0051301,cell division; GO:0006952,defense response; GO:0009873,ethylene-activated signaling pathway; GO:0010087,phloem or xylem histogenesis; GO:0010200,response to chitin; GO:0009644,response to high light intensity; GO:0000302,response to reactive oxygen species; GO:0006351,transcription, DNA-te…	AP2 domain
BnaA01g35330D	22.71	17.23	15.42	9.29	8.2	11.08	1.059	4.85086e-07	up	--	VAN3-binding protein [Brassica napus]	RecName: Full=VAN3-binding protein {ECO:0000303|PubMed:19363154}; AltName: Full=Protein FORKED 1;	SubName: Full=BnaA01g35330D protein {ECO:0000313|EMBL:CDY65120.1};	--	GO:0009734,auxin-activated signaling pathway; GO:0010305,leaf vascular tissue pattern formation; GO:0010087,phloem or xylem histogenesis; GO:0009733,response to auxin	Plant pleckstrin homology-like region
BnaA01g35410D	0.58	0.84	0.54	1.85	2.17	2.17	-1.563	9.00462e-06	down	K11438 type III protein arginine methyltransferase [EC:2.1.1.321] | (RefSeq) protein arginine N-methyltransferase 1.6 (A)	protein arginine N-methyltransferase 1.6 [Brassica napus]	RecName: Full=Protein arginine N-methyltransferase 1.6; Short=AtPRMT16; Short=AtPRMT7; EC=2.1.1.-;	RecName: Full=Protein arginine N-methyltransferase {ECO:0000256|PIRNR:PIRNR036946};	Arginine N-methyltransferase	GO:0005829,cytosol; GO:0008469,histone-arginine N-methyltransferase activity; GO:0035242,protein-arginine omega-N asymmetric methyltransferase activity; GO:0035241,protein-arginine omega-N monomethyltransferase activity; GO:0019918,peptidyl-arginine methylation, to symmetrical-dimethyl arginine; GO:0006355,regulation of transcription, DNA-templated	Lysine methyltransferase
BnaA01g35480D	57.42	46.43	35.6	16	24.53	13.94	1.448	1.75751e-08	up	--	uncharacterized protein LOC106430985 [Brassica napus]	--	SubName: Full=BnaA01g35480D protein {ECO:0000313|EMBL:CDY66331.1};	--	--	CW-type Zinc Finger
BnaA01g35500D	0	0.32	0.4	1.33	1.24	1.44	-2.38	0.0105151	down	K03676 glutaredoxin 3 | (RefSeq) monothiol glutaredoxin-S4 (A)	PREDICTED: monothiol glutaredoxin-S4 [Brassica rapa]	RecName: Full=Monothiol glutaredoxin-S4; Short=AtGrxS4; AltName: Full=Protein ROXY 13;	SubName: Full=Uncharacterized protein {ECO:0000313|EnsemblPlants:Bra033503.1-P};	Glutaredoxin and related proteins	GO:0005737,cytoplasm; GO:0005634,nucleus; GO:0051537,2 iron, 2 sulfur cluster binding; GO:0009055,electron transfer activity; GO:0046872,metal ion binding; GO:0015035,protein disulfide oxidoreductase activity; GO:0045454,cell redox homeostasis	Glutaredoxin
BnaA01g35820D	1.41	1.27	1.3	2.94	3.06	3.13	-1.101	1.42965e-06	down	K12598 ATP-dependent RNA helicase DOB1 [EC:3.6.4.13] | (RefSeq) DExH-box ATP-dependent RNA helicase DExH9-like isoform X1 (A)	BnaA01g35820D [Brassica napus]	RecName: Full=DExH-box ATP-dependent RNA helicase DExH9 {ECO:0000305}; EC=3.6.4.13 {ECO:0000305}; AltName: Full=Protein MTR4 homolog {ECO:0000305}; Short=AtMTR4 {ECO:0000303|PubMed:21682783};	SubName: Full=BnaA01g35820D protein {ECO:0000313|EMBL:CDY65064.1};	Nuclear exosomal RNA helicase MTR4, DEAD-box superfamily	GO:0005730,nucleolus; GO:0005654,nucleoplasm; GO:0005634,nucleus; GO:0005524,ATP binding; GO:0004004,ATP-dependent RNA helicase activity; GO:0019843,rRNA binding; GO:0000460,maturation of 5.8S rRNA; GO:0006401,RNA catabolic process; GO:0031125,rRNA 3'-end processing; GO:0006364,rRNA processing	Helicase conserved C-terminal domain
BnaA01g35920D	3.89	3.47	2.7	2.09	1.88	1.3	1.039	0.0013766	up	K03252 translation initiation factor 3 subunit C | (RefSeq) eukaryotic translation initiation factor 3 subunit C-like (A)	BnaA01g35920D [Brassica napus]	--	SubName: Full=BnaA01g35920D protein {ECO:0000313|EMBL:CDY52220.1};	--	--	Protein of unknown function (DUF707)
BnaA01g36080D	24.32	29.23	23.77	13.81	14.36	12.39	1.029	1.26712e-11	up	K05658 ATP-binding cassette, subfamily B (MDR/TAP), member 1 [EC:3.6.3.44] | (RefSeq) uncharacterized protein LOC111274727 isoform X1 (A)	BnaA01g36080D [Brassica napus]	RecName: Full=COP1-interacting protein 7 {ECO:0000303|PubMed:9668129};	SubName: Full=BnaA01g36080D protein {ECO:0000313|EMBL:CDY52491.1};	--	GO:0005634,nucleus; GO:0005886,plasma membrane; GO:0009718,anthocyanin-containing compound biosynthetic process; GO:0015995,chlorophyll biosynthetic process; GO:0045893,positive regulation of transcription, DNA-templated; GO:0009416,response to light stimulus; GO:0006351,transcription, DNA-templated	--
BnaA01g36280D	36.86	37.6	31.87	11.97	8.07	11.33	1.866	9.12386e-27	up	K15283 solute carrier family 35, member E1 | (RefSeq) glucose-6-phosphate/phosphate translocator 2, chloroplastic (A)	BnaA01g36280D [Brassica napus]	RecName: Full=Glucose-6-phosphate/phosphate translocator 2, chloroplastic; Flags: Precursor;	SubName: Full=BnaA01g36280D protein {ECO:0000313|EMBL:CDY55220.1};	Glucose-6-phosphate/phosphate and phosphoenolpyruvate/phosphate antiporter	GO:0031969,chloroplast membrane; GO:0016021,integral component of membrane; GO:0005774,vacuolar membrane; GO:0015152,glucose-6-phosphate transmembrane transporter activity; GO:0005315,inorganic phosphate transmembrane transporter activity; GO:0015120,phosphoglycerate transmembrane transporter activity; GO:0071917,triose-phosphate transmembrane transporter activity; GO:0015760,glucose-6-phosphate …	UAA transporter family
BnaA01g36460D	0.82	0.94	1.77	5.34	4.76	6.82	-2.159	3.85645e-09	down	K12669 oligosaccharyltransferase complex subunit gamma | (RefSeq) probable dolichyl-diphosphooligosaccharide--protein glycosyltransferase subunit 3B (A)	BnaA01g36460D [Brassica napus]	RecName: Full=Probable dolichyl-diphosphooligosaccharide--protein glycosyltransferase subunit 3B; Flags: Precursor;	SubName: Full=BnaA01g36460D protein {ECO:0000313|EMBL:CDY64863.1};	Oligosaccharyltransferase, gamma subunit	GO:0009507,chloroplast; GO:0005783,endoplasmic reticulum; GO:0016021,integral component of membrane; GO:0008250,oligosaccharyltransferase complex; GO:0005886,plasma membrane; GO:0010483,pollen tube reception; GO:0006487,protein N-linked glycosylation; GO:0018279,protein N-linked glycosylation via asparagine	OST3 / OST6 family, transporter family
BnaA01g36560D	4.29	3.77	4.48	1.9	2.35	2.23	1.052	0.00038431	up	--	peroxisome biogenesis protein 22 isoform X2 [Brassica napus]	RecName: Full=Peroxisome biogenesis protein 22; AltName: Full=Peroxin-22; Short=AtPEX22;	SubName: Full=BnaA01g36560D protein {ECO:0000313|EMBL:CDY55654.1};	--	GO:0016021,integral component of membrane; GO:0005778,peroxisomal membrane; GO:0007031,peroxisome organization; GO:0015031,protein transport	--
BnaA01g36610D	1.34	0.63	1.92	0	0	0	7.023	1.17873e-06	up	K00128 aldehyde dehydrogenase (NAD+) [EC:1.2.1.3] | (RefSeq) hypothetical protein (A)	cysteine-rich repeat secretory protein 18 [Brassica napus]	RecName: Full=Putative cysteine-rich repeat secretory protein 17; Flags: Precursor;	SubName: Full=BnaA01g36610D protein {ECO:0000313|EMBL:CDY55661.1};	--	GO:0005576,extracellular region	Salt stress response/antifungal
BnaA01g36920D	49.26	71.01	56.62	253.47	169.75	255.27	-1.834	3.76538e-23	down	K00789 S-adenosylmethionine synthetase [EC:2.5.1.6] | (RefSeq) S-adenosylmethionine synthase 2 (A)	PREDICTED: S-adenosylmethionine synthase 2 [Brassica rapa]	RecName: Full=S-adenosylmethionine synthase 2; Short=AdoMet synthase 2; EC=2.5.1.6 {ECO:0000250|UniProtKB:Q96551}; AltName: Full=Methionine adenosyltransferase 2; Short=MAT 2;	RecName: Full=S-adenosylmethionine synthase {ECO:0000256|RuleBase:RU000541}; EC=2.5.1.6 {ECO:0000256|RuleBase:RU000541};	S-adenosylmethionine synthetase	GO:0005737,cytoplasm; GO:0005524,ATP binding; GO:0046872,metal ion binding; GO:0004478,methionine adenosyltransferase activity; GO:0006730,one-carbon metabolic process; GO:0006556,S-adenosylmethionine biosynthetic process	S-adenosylmethionine synthetase, N-terminal domain
BnaA01g37010D	4.1	2.64	3.45	8.45	10.57	7.98	-1.308	8.29677e-07	down	K17506 protein phosphatase 1L [EC:3.1.3.16] | (RefSeq) probable protein phosphatase 2C 74 (A)	probable protein phosphatase 2C 41 [Brassica napus]	RecName: Full=Probable protein phosphatase 2C 41; Short=AtPP2C41; EC=3.1.3.16;	SubName: Full=BnaA01g37010D protein {ECO:0000313|EMBL:CDY67911.1};	Serine/threonine protein phosphatase	GO:0005737,cytoplasm; GO:0005634,nucleus; GO:0046872,metal ion binding; GO:0004722,protein serine/threonine phosphatase activity; GO:0009819,drought recovery; GO:0000226,microtubule cytoskeleton organization; GO:0045926,negative regulation of growth; GO:0006470,protein dephosphorylation	Stage II sporulation protein E (SpoIIE)
BnaA01g37100D	7.65	10.27	10.76	30.26	51.43	34.21	-1.928	1.87196e-15	down	K01051 pectinesterase [EC:3.1.1.11] | (RefSeq) pectinesterase/pectinesterase inhibitor 3-like (A)	BnaA01g37100D [Brassica napus]	RecName: Full=Pectinesterase/pectinesterase inhibitor 3; Includes: RecName: Full=Pectinesterase inhibitor 3; AltName: Full=Pectin methylesterase inhibitor 3; Includes: RecName: Full=Pectinesterase 3; Short=PE 3; EC=3.1.1.11; AltName: Full=Pectin methylesterase 27; Short=AtPME27; AltName: Full=Pectin methylesterase 3; Flags: Precursor;	RecName: Full=Pectinesterase {ECO:0000256|RuleBase:RU000589}; EC=3.1.1.11 {ECO:0000256|RuleBase:RU000589};	--	GO:0048046,apoplast; GO:0005618,cell wall; GO:0005737,cytoplasm; GO:0005886,plasma membrane; GO:0045330,aspartyl esterase activity; GO:0030599,pectinesterase activity; GO:0046910,pectinesterase inhibitor activity; GO:0042545,cell wall modification; GO:0050829,defense response to Gram-negative bacterium; GO:0045490,pectin catabolic process; GO:0009620,response to fungus; GO:0009624,response to nem…	Autophagy protein Apg17
BnaA01g37160D	1.53	1.17	1.69	2.83	3.93	6.18	-1.464	0.00124149	down	K20359 PRA1 family protein 1 | (RefSeq) PRA1 family protein F3-like (A)	BnaA01g37160D [Brassica napus]	RecName: Full=PRA1 family protein F3 {ECO:0000303|PubMed:18583532}; Short=AtPRA1.F3 {ECO:0000303|PubMed:18583532}; AltName: Full=Prenylated Rab acceptor 8 {ECO:0000303|PubMed:18845362};	RecName: Full=PRA1 family protein {ECO:0000256|RuleBase:RU363107};	Prenylated rab acceptor 1	GO:0005783,endoplasmic reticulum; GO:0005789,endoplasmic reticulum membrane; GO:0016021,integral component of membrane; GO:0016192,vesicle-mediated transport	PRA1 family protein
BnaA01g37200D	1.55	2.96	1.57	10.22	13.15	14.55	-2.544	9.41612e-18	down	K12638 3-epi-6-deoxocathasterone 23-monooxygenase [EC:1.14.13.112] | (RefSeq) 3-epi-6-deoxocathasterone 23-monooxygenase (A)	PREDICTED: 3-epi-6-deoxocathasterone 23-monooxygenase isoform X1 [Brassica rapa]	RecName: Full=3-epi-6-deoxocathasterone 23-monooxygenase; EC=1.14.13.112; AltName: Full=Cytochrome P450 90D1;	SubName: Full=Uncharacterized protein {ECO:0000313|EnsemblPlants:Bra021505.1-P};	Cytochrome P450 CYP4/CYP19/CYP26 subfamilies	GO:0005789,endoplasmic reticulum membrane; GO:0016021,integral component of membrane; GO:0102097,(22S)-22-hydroxy-5alpha-campestan-3-one C-23 hydroxylase activity; GO:0020037,heme binding; GO:0005506,iron ion binding; GO:0016709,oxidoreductase activity, acting on paired donors, with incorporation or reduction of molecular oxygen, NAD(P)H as one donor, and incorporation of one atom of oxygen; GO:0…	Cytochrome P450
BnaA01g37210D	21.98	21.21	34.6	56.82	65.6	63	-1.158	5.03165e-09	down	K12309 beta-galactosidase [EC:3.2.1.23] | (RefSeq) beta-galactosidase 2 (A)	BnaA01g37210D [Brassica napus]	RecName: Full=Beta-galactosidase 1; Short=Lactase 1; EC=3.2.1.23; Flags: Precursor;	RecName: Full=Beta-galactosidase {ECO:0000256|RuleBase:RU000675}; EC=3.2.1.23 {ECO:0000256|RuleBase:RU000675};	Beta-galactosidase	GO:0048046,apoplast; GO:0005618,cell wall; GO:0009505,plant-type cell wall; GO:0009506,plasmodesma; GO:0005773,vacuole; GO:0004565,beta-galactosidase activity; GO:0030246,carbohydrate binding; GO:0005975,carbohydrate metabolic process	Beta-galactosidase jelly roll domain
BnaA01g37220D	0.8	2.04	1.61	3.62	3.35	4.28	-1.238	0.000470382	down	K01193 beta-fructofuranosidase [EC:3.2.1.26] | (RefSeq) beta-fructofuranosidase, insoluble isoenzyme CWINV1 (A)	BnaA01g37220D [Brassica napus]	RecName: Full=Beta-fructofuranosidase, insoluble isoenzyme CWINV1; EC=3.2.1.26; AltName: Full=Cell wall beta-fructosidase 1; Short=AtbetaFRUCT1; AltName: Full=Cell wall invertase 1; Short=AtcwINV1; AltName: Full=Sucrose hydrolase 1; Flags: Precursor;	SubName: Full=BnaA01g37220D protein {ECO:0000313|EMBL:CDY51739.1};	Beta-fructofuranosidase (invertase)	GO:0048046,apoplast; GO:0005618,cell wall; GO:0005886,plasma membrane; GO:0004564,beta-fructofuranosidase activity; GO:0004575,sucrose alpha-glucosidase activity; GO:0005975,carbohydrate metabolic process; GO:0050832,defense response to fungus; GO:0080167,response to karrikin; GO:0009611,response to wounding	Glycosyl hydrolases family 32 C terminal
BnaA01g37370D	60.31	55.59	52.06	28.49	24.84	34.19	1.044	1.59802e-12	up	K14497 protein phosphatase 2C [EC:3.1.3.16] | (RefSeq) protein phosphatase 2C 37-like (A)	BnaA01g37370D [Brassica napus]	RecName: Full=Protein phosphatase 2C 37; Short=AtPP2C37; EC=3.1.3.16; AltName: Full=Protein ABA-HYPERSENSITIVE GERMINATION 3; AltName: Full=Protein phosphatase 2C A; Short=PP2CA;	SubName: Full=BnaA01g37370D protein {ECO:0000313|EMBL:CDY67227.1};	Serine/threonine protein phosphatase	GO:0005829,cytosol; GO:0005634,nucleus; GO:0046872,metal ion binding; GO:0004721,phosphoprotein phosphatase activity; GO:0019901,protein kinase binding; GO:0004722,protein serine/threonine phosphatase activity; GO:0009738,abscisic acid-activated signaling pathway; GO:0009788,negative regulation of abscisic acid-activated signaling pathway; GO:0010360,negative regulation of anion channel activity;…	Protein phosphatase 2C
BnaA02g00100D	453.66	367.23	377.08	134.79	177.2	140.91	1.499	7.35536e-19	up	K00026 malate dehydrogenase [EC:1.1.1.37] | (RefSeq) malate dehydrogenase 2, glyoxysomal (A)	PREDICTED: malate dehydrogenase 2, glyoxysomal [Brassica rapa]	RecName: Full=Malate dehydrogenase 1, glyoxysomal; EC=1.1.1.37; Flags: Precursor;	RecName: Full=Malate dehydrogenase {ECO:0000256|RuleBase:RU003405}; EC=1.1.1.37 {ECO:0000256|RuleBase:RU003405};	NAD-dependent malate dehydrogenase	GO:0009514,glyoxysome; GO:0030060,L-malate dehydrogenase activity; GO:0006097,glyoxylate cycle; GO:0006108,malate metabolic process; GO:0006099,tricarboxylic acid cycle	3-beta hydroxysteroid dehydrogenase/isomerase family
BnaA02g00270D	3.63	8.9	5	16.32	7.2	18.32	-1.146	0.00947588	down	K12833 pre-mRNA branch site protein p14 | (RefSeq) RNA-binding protein BRN2-like isoform X1 (A)	PREDICTED: uncharacterized protein LOC106325185 [Brassica oleracea var. oleracea]	--	SubName: Full=Uncharacterized protein {ECO:0000313|EnsemblPlants:Bo2g009640.1};	--	--	Cleavage site for pathogenic type III effector avirulence factor Avr
BnaA02g00400D	1.22	3.12	4.08	13.48	7.22	15.37	-1.992	4.0002e-07	down	K01858 myo-inositol-1-phosphate synthase [EC:5.5.1.4] | (RefSeq) probable inositol 3-phosphate synthase isozyme 3 (A)	probable inositol 3-phosphate synthase isozyme 3 [Brassica napus]	RecName: Full=Probable inositol 3-phosphate synthase isozyme 3; Short=AtIPS3; Short=MIP synthase 3; EC=5.5.1.4; AltName: Full=Myo-inositol 1-phosphate synthase 3; Short=AtMIPS 3; Short=MI-1-P synthase 3;	SubName: Full=Uncharacterized protein {ECO:0000313|EnsemblPlants:Bo2g009740.1};	Myo-inositol-1-phosphate synthase	GO:0005737,cytoplasm; GO:0004512,inositol-3-phosphate synthase activity; GO:0009793,embryo development ending in seed dormancy; GO:0006021,inositol biosynthetic process; GO:0008654,phospholipid biosynthetic process	Myo-inositol-1-phosphate synthase
BnaA02g00540D	266.66	298.49	236	676.86	634.92	691.58	-1.221	4.63074e-24	down	K06630 14-3-3 protein epsilon | (RefSeq) 14-3-3-like protein GF14 lambda (A)	PREDICTED: 14-3-3-like protein GF14 lambda [Brassica rapa]	RecName: Full=14-3-3-like protein GF14 lambda; AltName: Full=14-3-3-like protein AFT1; AltName: Full=14-3-3-like protein RCI2; AltName: Full=General regulatory factor 6;	SubName: Full=Uncharacterized protein {ECO:0000313|EnsemblPlants:Bo2g009880.1};	Multifunctional chaperone (14-3-3 family)	GO:0005618,cell wall; GO:0009507,chloroplast; GO:0005737,cytoplasm; GO:0005829,cytosol; GO:0005634,nucleus; GO:0005886,plasma membrane; GO:0019904,protein domain specific binding; GO:0009742,brassinosteroid mediated signaling pathway; GO:0042742,defense response to bacterium; GO:0045732,positive regulation of protein catabolic process; GO:0046686,response to cadmium ion; GO:0009409,response to co…	Protein of unknown function DUF47
BnaA02g00570D	0.9	0.53	0.58	1.76	1.67	1.76	-1.272	0.00248117	down	K04733 interleukin-1 receptor-associated kinase 4 [EC:2.7.11.1] | (RefSeq) receptor-like cytosolic serine/threonine-protein kinase RBK1 (A)	receptor-like cytosolic serine/threonine-protein kinase RBK1 [Brassica napus]	RecName: Full=Receptor-like cytosolic serine/threonine-protein kinase RBK1; EC=2.7.11.1; AltName: Full=Protein ROP BINDING PROTEIN KINASES 1;	SubName: Full=Uncharacterized protein {ECO:0000313|EnsemblPlants:Bo2g009910.1};	Serine/threonine protein kinase	GO:0005737,cytoplasm; GO:0005829,cytosol; GO:0012505,endomembrane system; GO:0005634,nucleus; GO:0005886,plasma membrane; GO:0005524,ATP binding; GO:0051020,GTPase binding; GO:0016301,kinase activity; GO:0004675,transmembrane receptor protein serine/threonine kinase activity; GO:0007166,cell surface receptor signaling pathway; GO:0071369,cellular response to ethylene stimulus; GO:0009814,defense …	Fungal protein kinase
BnaA02g00800D	4.5	4.49	3.46	7.66	9.55	9.94	-1.028	3.83049e-05	down	K10406 kinesin family member C2/C3 | (RefSeq) kinesin KP1-like (A)	PREDICTED: uncharacterized protein LOC103850289 [Brassica rapa]	--	SubName: Full=Uncharacterized protein {ECO:0000313|EnsemblPlants:Bra028555.1-P};	--	--	Plant protein of unknown function (DUF868)
BnaA02g00910D	2.13	2.67	2.73	6.83	5.4	8.53	-1.36	4.18085e-09	down	K14546 U3 small nucleolar RNA-associated protein 5 | (RefSeq) WD repeat-containing protein 43-like (A)	PREDICTED: WD repeat-containing protein 43-like [Brassica rapa]	RecName: Full=Katanin p80 WD40 repeat-containing subunit B1 homolog {ECO:0000255|HAMAP-Rule:MF_03022};	SubName: Full=Uncharacterized protein {ECO:0000313|EnsemblPlants:Bra023316.1-P};	WD40 repeat-containing protein	GO:0080008,Cul4-RING E3 ubiquitin ligase complex; GO:0008352,katanin complex; GO:0005874,microtubule; GO:0008017,microtubule binding; GO:0043622,cortical microtubule organization; GO:0051013,microtubule severing	Cwf15/Cwc15 cell cycle control protein
BnaA02g01000D	22.36	33.05	32.67	177.49	99.97	213.93	-2.371	8.41607e-22	down	K03097 casein kinase II subunit alpha [EC:2.7.11.1] | (RefSeq) casein kinase II subunit alpha-like isoform X2 (A)	PREDICTED: uncharacterized protein LOC103850771 [Brassica rapa]	--	SubName: Full=Uncharacterized protein {ECO:0000313|EnsemblPlants:Bo2g010390.1};	--	--	Protein of unknown function (DUF642)
BnaA02g01030D	3.82	3.56	4.76	1.65	1.77	1.85	1.305	1.45024e-09	up	--	protein EMBRYONIC FLOWER 1-like [Brassica napus]	RecName: Full=Protein EMBRYONIC FLOWER 1;	SubName: Full=Uncharacterized protein {ECO:0000313|EnsemblPlants:Bra023327.1-P};	--	GO:0005634,nucleus; GO:0003690,double-stranded DNA binding; GO:0003723,RNA binding; GO:0003697,single-stranded DNA binding; GO:0070734,histone H3-K27 methylation; GO:0016571,histone methylation; GO:0042538,hyperosmotic salinity response; GO:0010022,meristem determinacy; GO:0009910,negative regulation of flower development; GO:0045892,negative regulation of transcription, DNA-templated; GO:0009791…	--
BnaA02g01100D	10.74	11.04	10.73	30.6	44.28	43.23	-1.765	1.25558e-18	down	--	protein BIG GRAIN 1-like D [Brassica napus]	RecName: Full=Protein BIG GRAIN 1-like D {ECO:0000305};	SubName: Full=Uncharacterized protein {ECO:0000313|EnsemblPlants:Bra023361.1-P};	--	GO:0005886,plasma membrane; GO:0060918,auxin transport; GO:0009734,auxin-activated signaling pathway; GO:0007623,circadian rhythm; GO:0010929,positive regulation of auxin mediated signaling pathway	--
BnaA02g01140D	2.21	2.28	1.43	7.79	4.18	6.37	-1.523	0.000325669	down	K13899 cystatin-C | (RefSeq) cystatin-1-like (A)	PREDICTED: cysteine proteinase inhibitor 1 [Brassica oleracea var. oleracea]	RecName: Full=Cysteine proteinase inhibitor 1; Short=AtCYS-1;	RecName: Full=Cysteine proteinase inhibitor {ECO:0000256|RuleBase:RU362130};	--	GO:0005829,cytosol; GO:0005783,endoplasmic reticulum; GO:0005886,plasma membrane; GO:0005774,vacuolar membrane; GO:0004869,cysteine-type endopeptidase inhibitor activity; GO:0002020,protease binding; GO:0070417,cellular response to cold; GO:0034605,cellular response to heat; GO:0042631,cellular response to water deprivation; GO:0006952,defense response; GO:2000117,negative regulation of cysteine-…	Origin recognition complex (ORC) subunit 4 C-terminus
BnaA02g01150D	8.55	9.5	5.69	22.56	14.26	19.02	-1.127	3.17579e-06	down	--	protein CLT3, chloroplastic-like [Brassica napus]	RecName: Full=Protein CLT3, chloroplastic {ECO:0000303|PubMed:20080670}; AltName: Full=CRT-like transporter 3 {ECO:0000303|PubMed:20080670}; AltName: Full=Chloroquine-resistance transporter-like transporter 3 {ECO:0000303|PubMed:20080670}; Flags: Precursor;	SubName: Full=Uncharacterized protein {ECO:0000313|EnsemblPlants:Bo2g010850.1};	--	GO:0031969,chloroplast membrane; GO:0016021,integral component of membrane; GO:0009536,plastid; GO:0002229,defense response to oomycetes; GO:0034635,glutathione transport; GO:0046686,response to cadmium ion	UAA transporter family
BnaA02g01320D	1.96	2.07	2.2	9.92	7.45	8.7	-1.962	4.54912e-15	down	K13420 LRR receptor-like serine/threonine-protein kinase FLS2 [EC:2.7.11.1] | (RefSeq) putative receptor-like protein kinase At3g47110 (A)	DNA damage-repair/toleration protein DRT100-like [Brassica napus]	RecName: Full=DNA damage-repair/toleration protein DRT100; Flags: Precursor;	SubName: Full=Uncharacterized protein {ECO:0000313|EnsemblPlants:Bra023383.1-P};	FOG: Leucine rich repeat	GO:0009507,chloroplast; GO:0000166,nucleotide binding; GO:0006281,DNA repair	Leucine rich repeat N-terminal domain
BnaA02g01340D	12.29	18.23	8.81	7.41	5.71	5.62	1.171	8.31246e-06	up	K09955 uncharacterized protein | (RefSeq) uncharacterized LOC103850835 (A)	PREDICTED: uncharacterized protein LOC103850835 [Brassica rapa]	--	SubName: Full=Uncharacterized protein {ECO:0000313|EnsemblPlants:Bra023384.1-P};	--	--	Alpha-L-arabinofuranosidase B (ABFB) domain
BnaA02g01450D	41.68	31.36	12.88	10.55	9.1	7.87	1.749	9.30193e-07	up	K15382 solute carrier family 50 (sugar transporter) | (RefSeq) bidirectional sugar transporter SWEET15-like (A)	PREDICTED: bidirectional sugar transporter SWEET15-like [Brassica rapa]	RecName: Full=Bidirectional sugar transporter SWEET15 {ECO:0000303|PubMed:21107422}; Short=AtSWEET15 {ECO:0000303|PubMed:21107422}; AltName: Full=Protein SUGARS WILL EVENTUALLY BE EXPORTED TRANSPORTERS 15 {ECO:0000303|PubMed:21107422}; AltName: Full=Senescence-associated protein 29 {ECO:0000303|PubMed:20963606};	RecName: Full=Bidirectional sugar transporter SWEET {ECO:0000256|RuleBase:RU910715};	Multitransmembrane protein	GO:0000139,Golgi membrane; GO:0005887,integral component of plasma membrane; GO:0008515,sucrose transmembrane transporter activity; GO:0051119,sugar transmembrane transporter activity; GO:0071215,cellular response to abscisic acid stimulus; GO:0071470,cellular response to osmotic stress; GO:0071446,cellular response to salicylic acid stimulus; GO:0009793,embryo development ending in seed dormancy…	PQ loop repeat
BnaA02g01630D	66.56	69.8	61.71	33.92	29.99	38.64	1.052	2.76226e-15	up	K00411 ubiquinol-cytochrome c reductase iron-sulfur subunit [EC:1.10.2.2] | (RefSeq) cytochrome b-c1 complex subunit Rieske-4, mitochondrial-like (A)	cytochrome b-c1 complex subunit Rieske-4, mitochondrial-like [Brassica napus]	RecName: Full=Cytochrome b-c1 complex subunit Rieske-2, mitochondrial {ECO:0000305}; EC=1.10.2.2 {ECO:0000250|UniProtKB:P08067}; AltName: Full=Complex III subunit 5-2 {ECO:0000305}; AltName: Full=Rieske iron-sulfur protein 2 {ECO:0000305}; Short=RISP2 {ECO:0000305}; AltName: Full=Ubiquinol-cytochrome c reductase iron-sulfur subunit 2 {ECO:0000303|PubMed:18305213}; Flags: Precursor;	RecName: Full=Cytochrome b-c1 complex subunit Rieske, mitochondrial {ECO:0000256|RuleBase:RU004494}; EC=1.10.2.2 {ECO:0000256|RuleBase:RU004494};	Ubiquinol cytochrome c reductase, subunit RIP1	GO:0016021,integral component of membrane; GO:0031966,mitochondrial membrane; GO:0005750,mitochondrial respiratory chain complex III; GO:0005739,mitochondrion; GO:0051537,2 iron, 2 sulfur cluster binding; GO:0046872,metal ion binding; GO:0008121,ubiquinol-cytochrome-c reductase activity	Rieske [2Fe-2S] domain
BnaA02g01780D	48.21	45.99	54.76	23.62	29.68	25.29	1.018	3.2586e-11	up	K06207 GTP-binding protein | (RefSeq) putative elongation factor TypA-like SVR3, chloroplastic (A)	putative elongation factor TypA-like SVR3, chloroplastic [Brassica napus]	RecName: Full=Putative elongation factor TypA-like SVR3, chloroplastic; AltName: Full=Protein HAPPY ON NORFLURAZON 23 {ECO:0000303|PubMed:21208309}; AltName: Full=Protein SUPPRESSOR OF VARIEGATION 3 {ECO:0000303|PubMed:21187014}; Flags: Precursor;	SubName: Full=Uncharacterized protein {ECO:0000313|EnsemblPlants:Bo9g166590.1};	Elongation factor-type GTP-binding protein	GO:0009507,chloroplast; GO:0005525,GTP binding; GO:0003924,GTPase activity; GO:0003746,translation elongation factor activity; GO:0050821,protein stabilization; GO:0009409,response to cold; GO:0006364,rRNA processing	Signal recognition particle receptor beta subunit
BnaA02g01890D	5.48	4.35	3.06	1.88	1.08	1.41	1.67	3.02404e-07	up	K03255 protein TIF31 | (RefSeq) hypothetical protein (A)	telomere repeat-binding protein 4-like [Brassica napus]	RecName: Full=Telomere repeat-binding protein 4; AltName: Full=H-protein promoter binding factor-1; Short=AtTBP1; AltName: Full=Telomeric DNA-binding protein 1;	SubName: Full=Uncharacterized protein {ECO:0000313|EnsemblPlants:Bra023437.1-P};	--	GO:0000781,chromosome, telomeric region; GO:0000783,nuclear telomere cap complex; GO:0003677,DNA binding; GO:0003691,double-stranded telomeric DNA binding; GO:0042162,telomeric DNA binding; GO:0006355,regulation of transcription, DNA-templated; GO:0000723,telomere maintenance; GO:0031627,telomeric loop formation; GO:0006351,transcription, DNA-templated	Myb-like DNA-binding domain
BnaA02g02020D	29.41	45.56	31.55	14.64	5.55	18.15	1.589	2.90602e-06	up	K21360 3-isopropylmalate/methylthioalkylmalate dehydrogenase [EC:1.1.1.85 1.1.1.-] | (RefSeq) 3-isopropylmalate dehydrogenase 3, chloroplastic (A)	3-isopropylmalate dehydrogenase 3, chloroplastic [Brassica napus]	RecName: Full=3-isopropylmalate dehydrogenase 3, chloroplastic; Short=3-IPM-DH 3; Short=IMDH 3; EC=1.1.1.85; AltName: Full=Beta-IPM dehydrogenase 3; Flags: Precursor;	RecName: Full=3-isopropylmalate dehydrogenase {ECO:0000256|RuleBase:RU004445}; EC=1.1.1.85 {ECO:0000256|RuleBase:RU004445};	3-isopropylmalate dehydrogenase	GO:0009507,chloroplast; GO:0009570,chloroplast stroma; GO:0009536,plastid; GO:0003862,3-isopropylmalate dehydrogenase activity; GO:0000287,magnesium ion binding; GO:0051287,NAD binding; GO:0019761,glucosinolate biosynthetic process; GO:0009098,leucine biosynthetic process; GO:0009651,response to salt stress	Isocitrate/isopropylmalate dehydrogenase
BnaA02g02200D	48.83	48.26	38.14	13.87	15.21	14.61	1.73	6.23795e-28	up	K02575 MFS transporter, NNP family, nitrate/nitrite transporter | (RefSeq) high affinity nitrate transporter 2.7-like (A)	high affinity nitrate transporter 2.7-like [Brassica napus]	RecName: Full=High affinity nitrate transporter 2.7; Short=AtNRT2:7;	SubName: Full=Uncharacterized protein {ECO:0000313|EnsemblPlants:Bra023475.1-P};	--	GO:0016021,integral component of membrane; GO:0009705,plant-type vacuole membrane; GO:0005886,plasma membrane; GO:0015112,nitrate transmembrane transporter activity; GO:0071249,cellular response to nitrate; GO:0042128,nitrate assimilation; GO:0015706,nitrate transport	Major Facilitator Superfamily
BnaA02g02250D	0.85	1.97	1.3	0.31	0.23	0.73	1.77	0.00441893	up	K09753 cinnamoyl-CoA reductase [EC:1.2.1.44] | (RefSeq) cinnamoyl-CoA reductase 1-like isoform X1 (A)	PREDICTED: cinnamoyl-CoA reductase-like SNL6 isoform X1 [Brassica rapa]	RecName: Full=Cinnamoyl-CoA reductase-like SNL6 {ECO:0000305}; EC=1.2.-.- {ECO:0000305}; AltName: Full=Protein SUPPRESSOR OF NH1-MEDIATED LESION 6 {ECO:0000303|PubMed:20862311};	SubName: Full=Uncharacterized protein {ECO:0000313|EnsemblPlants:Bra023481.1-P};	Flavonol reductase/cinnamoyl-CoA reductase	GO:0003854,3-beta-hydroxy-delta5-steroid dehydrogenase activity; GO:0042742,defense response to bacterium; GO:0009809,lignin biosynthetic process; GO:0006694,steroid biosynthetic process	GDP-mannose 4,6 dehydratase
BnaA02g02290D	800.38	742.02	875.82	188.36	358.41	192.75	1.794	7.67028e-13	up	K01673 carbonic anhydrase [EC:4.2.1.1] | (RefSeq) beta carbonic anhydrase 2, chloroplastic (A)	beta carbonic anhydrase 2, chloroplastic [Brassica napus]	RecName: Full=Beta carbonic anhydrase 2, chloroplastic; Short=AtbCA2; Short=AtbetaCA2; EC=4.2.1.1; AltName: Full=Beta carbonate dehydratase 2; Flags: Precursor;	RecName: Full=Carbonic anhydrase {ECO:0000256|RuleBase:RU003956}; EC=4.2.1.1 {ECO:0000256|RuleBase:RU003956}; AltName: Full=Carbonate dehydratase {ECO:0000256|RuleBase:RU003956};	Predicted carbonic anhydrase involved in protection against oxidative damage	GO:0048046,apoplast; GO:0009507,chloroplast; GO:0009941,chloroplast envelope; GO:0009570,chloroplast stroma; GO:0009535,chloroplast thylakoid membrane; GO:0005737,cytoplasm; GO:0005829,cytosol; GO:0004089,carbonate dehydratase activity; GO:0008270,zinc ion binding; GO:0015976,carbon utilization; GO:0042742,defense response to bacterium	Carbonic anhydrase
BnaA02g02340D	15.81	14.43	12.61	7.95	7	7.32	1.046	4.86383e-13	up	K03549 KUP system potassium uptake protein | (RefSeq) potassium transporter 8 (A)	PREDICTED: potassium transporter 8-like isoform X1 [Raphanus sativus]	RecName: Full=Potassium transporter 8; Short=AtHAK8; Short=AtPOT8;	RecName: Full=Potassium transporter {ECO:0000256|RuleBase:RU321113};	--	GO:0016021,integral component of membrane; GO:0005886,plasma membrane; GO:0015079,potassium ion transmembrane transporter activity	SMP-30/Gluconolactonase/LRE-like region
BnaA02g02530D	0.51	1.51	2.23	0	0	0.13	4.98	0.000384135	up	--	PREDICTED: uncharacterized protein LOC106325740 [Brassica oleracea var. oleracea]	--	SubName: Full=Uncharacterized protein {ECO:0000313|EnsemblPlants:Bo2g012440.1};	--	--	Bcl-2-binding component 3, p53 upregulated modulator of apoptosis
BnaA02g02550D	5.24	6.08	4.78	32.05	32.44	40.85	-2.609	1.17151e-35	down	K02899 large subunit ribosomal protein L27 | (RefSeq) uncharacterized protein LOC106364608 (A)	uncharacterized protein LOC106364608 [Brassica napus]	RecName: Full=50S ribosomal protein L27, chloroplastic {ECO:0000255|HAMAP-Rule:MF_00539};	SubName: Full=Uncharacterized protein {ECO:0000313|EnsemblPlants:Bra023512.1-P};	Mitochondrial ribosomal protein MRP7 (L2)	GO:0009507,chloroplast; GO:0005840,ribosome; GO:0003735,structural constituent of ribosome; GO:0006412,translation	Ribosomal L27 protein
BnaA02g02560D	69.51	100.26	98.01	581.3	644.28	675.66	-2.731	9.98737e-66	down	K03860 phosphatidylinositol glycan, class Q | (RefSeq) N-acetylglucosaminyl-phosphatidylinositol biosynthetic protein gpi1-like (A)	PREDICTED: gibberellin-regulated protein 4-like [Brassica rapa]	RecName: Full=Gibberellin-regulated protein 4; AltName: Full=GAST1 protein homolog 4; Flags: Precursor;	SubName: Full=Uncharacterized protein {ECO:0000313|EnsemblPlants:Bo2g012470.1};	--	GO:0005623,cell; GO:0005576,extracellular region; GO:0045454,cell redox homeostasis; GO:0009740,gibberellic acid mediated signaling pathway; GO:0009739,response to gibberellin	Gibberellin regulated protein
BnaA02g02650D	2.29	4.96	4.9	1.01	1.58	2.13	1.451	0.000374537	up	K16812 targeting protein for Xklp2 | (RefSeq) protein TPX2 (A)	uncharacterized protein BNAA02G02650D [Brassica napus]	RecName: Full=Protein TPX2; Short=AtTPX2; AltName: Full=Targeting protein for XKLP2;	SubName: Full=Uncharacterized protein {ECO:0000313|EnsemblPlants:Bra023521.1-P};	--	GO:0009941,chloroplast envelope; GO:0005874,microtubule; GO:0005654,nucleoplasm; GO:0005634,nucleus; GO:0009524,phragmoplast; GO:0005819,spindle; GO:0008017,microtubule binding; GO:0032147,activation of protein kinase activity; GO:0051301,cell division; GO:0000278,mitotic cell cycle; GO:0090307,mitotic spindle assembly; GO:0060236,regulation of mitotic spindle organization; GO:0051225,spindle ass…	Targeting protein for Xklp2 (TPX2)
BnaA02g02750D	2.41	2.68	3.32	9.09	7.91	10.81	-1.624	1.12756e-17	down	K10908 DNA-directed RNA polymerase, mitochondrial [EC:2.7.7.6] | (RefSeq) DNA-directed RNA polymerase 2, chloroplastic/mitochondrial (A)	DNA-directed RNA polymerase 2, chloroplastic/mitochondrial [Brassica napus]	RecName: Full=DNA-directed RNA polymerase 2, chloroplastic/mitochondrial; EC=2.7.7.6; Flags: Precursor;	RecName: Full=DNA-directed RNA polymerase {ECO:0000256|RuleBase:RU003805}; EC=2.7.7.6 {ECO:0000256|RuleBase:RU003805};	Mitochondrial/chloroplast DNA-directed RNA polymerase RPO41, provides primers for DNA replication-initiation	GO:0009507,chloroplast; GO:0034245,mitochondrial DNA-directed RNA polymerase complex; GO:0003677,DNA binding; GO:0003899,DNA-directed 5'-3' RNA polymerase activity; GO:0006390,mitochondrial transcription	DNA-directed RNA polymerase N-terminal
BnaA02g02770D	4.96	5.7	5.88	16.86	10.66	21.42	-1.458	4.7086e-07	down	K14560 U3 small nucleolar ribonucleoprotein protein IMP3 | (RefSeq) U3 small nucleolar ribonucleoprotein protein IMP3 (A)	PREDICTED: U3 small nucleolar ribonucleoprotein protein IMP3-like [Brassica rapa]	RecName: Full=40S ribosomal protein S9-2;	SubName: Full=Uncharacterized protein {ECO:0000313|EnsemblPlants:Bra023536.1-P};	U3 small nucleolar ribonucleoprotein (snoRNP) component	GO:0005829,cytosol; GO:0022627,cytosolic small ribosomal subunit; GO:0016020,membrane; GO:0009506,plasmodesma; GO:0019843,rRNA binding; GO:0003735,structural constituent of ribosome; GO:0045903,positive regulation of translational fidelity; GO:0006412,translation	Ribosomal protein S4/S9 N-terminal domain
BnaA02g02830D	5.86	9.01	6.26	32.06	17.36	30.74	-1.816	4.2478e-10	down	K09060 plant G-box-binding factor | (RefSeq) G-box-binding factor 1 (A)	PREDICTED: basic leucine zipper 43-like [Brassica rapa]	RecName: Full=Basic leucine zipper 43 {ECO:0000303|PubMed:11906833}; Short=AtbZIP43 {ECO:0000303|PubMed:11906833}; Short=bZIP protein 43 {ECO:0000303|PubMed:11906833};	SubName: Full=Uncharacterized protein {ECO:0000313|EnsemblPlants:Bra023540.1-P};	--	GO:0005634,nucleus; GO:0003677,DNA binding; GO:0003700,DNA-binding transcription factor activity; GO:0006351,transcription, DNA-templated	Domain of unknown function (DUF4200)
BnaA02g02910D	408.51	438.45	537.03	207.78	279.7	214.52	1.071	2.15426e-09	up	--	PREDICTED: stress-induced protein KIN2 [Brassica rapa]	RecName: Full=Stress-induced protein KIN2; AltName: Full=Cold-induced protein COR6.6;	SubName: Full=Stress-induced protein Kin2 {ECO:0000313|EMBL:ABV89612.1};	--	GO:0009507,chloroplast; GO:0005737,cytoplasm; GO:0005634,nucleus; GO:0005886,plasma membrane; GO:0009737,response to abscisic acid; GO:0006970,response to osmotic stress; GO:0009414,response to water deprivation	--
BnaA02g02940D	15.67	19.43	14.24	91.97	137.85	104.58	-2.669	3.75836e-38	down	--	PREDICTED: mental retardation GTPase activating protein homolog 4-like isoform X1 [Brassica rapa]	--	SubName: Full=Uncharacterized protein {ECO:0000313|EnsemblPlants:Bra023549.1-P};	--	--	Mediator of RNA pol II transcription subunit 19
BnaA02g03120D	4.04	4.55	4.14	2.84	0.92	2.17	1.213	0.00371144	up	--	uncharacterized protein BNAA02G03120D [Brassica napus]	--	SubName: Full=Uncharacterized protein {ECO:0000313|EnsemblPlants:Bra023572.1-P};	--	--	--
BnaA02g03140D	153.84	144.78	142.53	34.45	22.72	34.37	2.375	2.55842e-49	up	K01915 glutamine synthetase [EC:6.3.1.2] | (RefSeq) glutamine synthetase cytosolic isozyme 1-4-like (A)	glutamine synthetase cytosolic isozyme 1-4-like [Brassica napus]	RecName: Full=Glutamine synthetase cytosolic isozyme 1-4; EC=6.3.1.2; AltName: Full=Glutamate--ammonia ligase GLN1;4; Short=GLN1;4;	RecName: Full=Glutamine synthetase {ECO:0000256|RuleBase:RU004356}; EC=6.3.1.2 {ECO:0000256|RuleBase:RU004356};	Glutamine synthetase	GO:0005829,cytosol; GO:0005524,ATP binding; GO:0004356,glutamate-ammonia ligase activity; GO:0006542,glutamine biosynthetic process; GO:0042128,nitrate assimilation; GO:0009399,nitrogen fixation	Glutamine synthetase, beta-Grasp domain
BnaA02g03150D	6.21	9.69	11.04	22.62	20.13	29.94	-1.331	6.15205e-09	down	K04733 interleukin-1 receptor-associated kinase 4 [EC:2.7.11.1] | (RefSeq) probable inactive receptor kinase RLK902 (A)	PREDICTED: probable inactive receptor kinase At5g16590 [Brassica rapa]	RecName: Full=Probable inactive receptor kinase At5g16590; Flags: Precursor;	SubName: Full=Uncharacterized protein {ECO:0000313|EnsemblPlants:Bra023574.1-P};	--	GO:0016021,integral component of membrane; GO:0016020,membrane; GO:0009505,plant-type cell wall; GO:0005886,plasma membrane; GO:0009506,plasmodesma; GO:0005524,ATP binding; GO:0004672,protein kinase activity; GO:0009610,response to symbiotic fungus	Mid2 like cell wall stress sensor
BnaA02g03200D	10.37	11.71	11.25	4.57	3.48	5.89	1.357	3.43206e-10	up	K16296 serine carboxypeptidase-like clade I [EC:3.4.16.-] | (RefSeq) serine carboxypeptidase-like 12 (A)	PREDICTED: serine carboxypeptidase-like 12 isoform X1 [Brassica rapa]	RecName: Full=Serine carboxypeptidase-like 3; EC=3.4.16.-; Flags: Precursor;	SubName: Full=Uncharacterized protein {ECO:0000313|EnsemblPlants:Bo2g013220.1};	Serine carboxypeptidases (lysosomal cathepsin A)	GO:0005576,extracellular region; GO:0004180,carboxypeptidase activity; GO:0016747,transferase activity, transferring acyl groups other than amino-acyl groups; GO:0019748,secondary metabolic process	Serine carboxypeptidase
BnaA02g03400D	246.55	239.87	222.84	83.1	117.33	119.67	1.245	1.71151e-13	up	K20093 DNA excision repair protein ERCC-6-like [EC:3.6.4.12] | (RefSeq) SNF2 super family (A)	uncharacterized protein LOC106354429 isoform X1 [Brassica napus]	--	SubName: Full=Uncharacterized protein {ECO:0000313|EnsemblPlants:Bra023597.1-P};	--	--	Rubredoxin
BnaA02g03440D	98.12	81.05	56.41	18.95	17.55	12.46	2.369	4.90082e-21	up	K00799 glutathione S-transferase [EC:2.5.1.18] | (RefSeq) glutathione S-transferase F12 (A)	glutathione S-transferase F12 [Brassica napus]	RecName: Full=Glutathione S-transferase F12; Short=AtGSTF12; EC=2.5.1.18; AltName: Full=GST class-phi member 12; AltName: Full=Glutathione S-transferase 26; AltName: Full=Protein TRANSPARENT TESTA 19;	SubName: Full=Uncharacterized protein {ECO:0000313|EnsemblPlants:Bra023602.1-P};	Glutathione S-transferase	GO:0005737,cytoplasm; GO:0005829,cytosol; GO:0005634,nucleus; GO:0009705,plant-type vacuole membrane; GO:0043169,cation binding; GO:0004364,glutathione transferase activity; GO:0046283,anthocyanin-containing compound metabolic process; GO:0006749,glutathione metabolic process; GO:1900384,regulation of flavonol biosynthetic process; GO:0009407,toxin catabolic process	Glutathione S-transferase, C-terminal domain
BnaA02g03510D	3.31	2.08	2.46	0.08	0.31	0.11	4.073	7.8348e-12	up	K12133 MYB-related transcription factor LHY | (RefSeq) hypothetical protein (A)	protein REVEILLE 1 [Brassica napus]	RecName: Full=Protein REVEILLE 1;	SubName: Full=Uncharacterized protein {ECO:0000313|EnsemblPlants:Bra023610.1-P};	Zuotin and related molecular chaperones (DnaJ superfamily), contains DNA-binding domains	GO:0005634,nucleus; GO:0003677,DNA binding; GO:0003700,DNA-binding transcription factor activity; GO:0009851,auxin biosynthetic process; GO:0009734,auxin-activated signaling pathway; GO:0007623,circadian rhythm; GO:0010600,regulation of auxin biosynthetic process; GO:0006355,regulation of transcription, DNA-templated; GO:0006351,transcription, DNA-templated	Myb DNA-binding like
BnaA02g03730D	4.89	4.45	4.04	0.96	0.98	1.68	1.978	3.0031e-10	up	K13754 solute carrier family 24 (sodium/potassium/calcium exchanger), member 6 | (RefSeq) cation/calcium exchanger 2 (A)	PREDICTED: cation/calcium exchanger 2-like [Brassica rapa]	RecName: Full=Cation/calcium exchanger 2; AltName: Full=Protein CATION EXCHANGER 8;	SubName: Full=Uncharacterized protein {ECO:0000313|EnsemblPlants:Bra023641.1-P};	K+-dependent Na+:Ca2+ antiporter	GO:0016021,integral component of membrane; GO:0015297,antiporter activity; GO:0006813,potassium ion transport; GO:0006814,sodium ion transport	Sodium/calcium exchanger protein
BnaA02g03790D	6.11	4.94	4.54	1.47	3.13	3.11	1.11	0.000463165	up	K19613 leucine-rich repeat protein SHOC2 | (RefSeq) disease resistance protein TAO1-like (A)	putative disease resistance protein At4g11170 isoform X1 [Brassica napus]	RecName: Full=Putative disease resistance protein At4g11170;	SubName: Full=Uncharacterized protein {ECO:0000313|EnsemblPlants:Bra023647.1-P};	--	GO:0005739,mitochondrion; GO:0043531,ADP binding; GO:0006952,defense response; GO:0010193,response to ozone; GO:0007165,signal transduction	AAA domain
BnaA02g03880D	0.77	0.43	0.43	7.25	11.26	13.68	-4.213	7.49178e-15	down	K14488 SAUR family protein | (RefSeq) auxin-responsive protein SAUR21-like (A)	BnaA02g03880D [Brassica napus]	RecName: Full=Auxin-responsive protein SAUR21 {ECO:0000305}; AltName: Full=Protein SMALL AUXIN UP RNA 21 {ECO:0000303|PubMed:12036261};	SubName: Full=BnaA02g03880D protein {ECO:0000313|EMBL:CDY53266.1};	--	GO:0005886,plasma membrane; GO:0009734,auxin-activated signaling pathway; GO:0007275,multicellular organism development; GO:0040008,regulation of growth	Auxin responsive protein
BnaA02g03890D	0.66	0.22	1.07	5.27	9.33	10.53	-3.592	8.8743e-10	down	K14488 SAUR family protein | (RefSeq) auxin-responsive protein SAUR21-like (A)	BnaA02g03890D [Brassica napus]	RecName: Full=Auxin-responsive protein SAUR21 {ECO:0000305}; AltName: Full=Protein SMALL AUXIN UP RNA 21 {ECO:0000303|PubMed:12036261};	SubName: Full=BnaA02g03890D protein {ECO:0000313|EMBL:CDY53265.1};	--	GO:0005886,plasma membrane; GO:0009734,auxin-activated signaling pathway; GO:0007275,multicellular organism development; GO:0040008,regulation of growth	Auxin responsive protein
BnaA02g03930D	3.21	3.5	0.82	8.24	10.2	18.6	-2.195	0.000108616	down	K14488 SAUR family protein | (RefSeq) auxin-responsive protein SAUR21-like (A)	BnaA02g03930D [Brassica napus]	RecName: Full=Auxin-responsive protein SAUR20 {ECO:0000305}; AltName: Full=Protein SMALL AUXIN UP RNA 20 {ECO:0000303|PubMed:12036261};	SubName: Full=BnaA02g03930D protein {ECO:0000313|EMBL:CDY53261.1};	--	GO:0005886,plasma membrane; GO:0009734,auxin-activated signaling pathway; GO:0007275,multicellular organism development; GO:0040008,regulation of growth	Auxin responsive protein
BnaA02g03940D	4.29	8.25	1.1	17.47	23	36.35	-2.391	3.10788e-05	down	K14488 SAUR family protein | (RefSeq) auxin-responsive protein SAUR21-like (A)	BnaA02g03940D [Brassica napus]	RecName: Full=Auxin-responsive protein SAUR21 {ECO:0000305}; AltName: Full=Protein SMALL AUXIN UP RNA 21 {ECO:0000303|PubMed:12036261};	SubName: Full=BnaA02g03940D protein {ECO:0000313|EMBL:CDY53260.1};	--	GO:0005886,plasma membrane; GO:0009734,auxin-activated signaling pathway; GO:0007275,multicellular organism development; GO:0040008,regulation of growth	Auxin responsive protein
BnaA02g04000D	1.16	2.29	2.44	8.08	5.79	13.28	-2.097	3.40633e-07	down	K11128 H/ACA ribonucleoprotein complex subunit 1 | (RefSeq) putative H/ACA ribonucleoprotein complex subunit 1-like protein 1 (A)	BnaA02g04000D [Brassica napus]	RecName: Full=Putative H/ACA ribonucleoprotein complex subunit 1-like protein 1;	RecName: Full=H/ACA ribonucleoprotein complex subunit {ECO:0000256|RuleBase:RU364004};	H/ACA small nucleolar RNP component GAR1	GO:0031429,box H/ACA snoRNP complex; GO:0009535,chloroplast thylakoid membrane; GO:0005730,nucleolus; GO:0034513,box H/ACA snoRNA binding; GO:0000454,snoRNA guided rRNA pseudouridine synthesis	Gar1/Naf1 RNA binding region
BnaA02g04250D	24.69	20.08	18.87	6.58	8.82	6.01	1.669	5.23833e-14	up	K03834 tyrosine-specific transport protein | (RefSeq) uncharacterized protein LOC104811210 (A)	BnaA02g04250D [Brassica napus]	--	SubName: Full=BnaA02g04250D protein {ECO:0000313|EMBL:CDY44920.1};	--	--	Tryptophan/tyrosine permease family
BnaA02g04440D	1.56	2.73	3.14	1.03	1.06	0.72	1.5	0.000361908	up	K01051 pectinesterase [EC:3.1.1.11] | (RefSeq) probable pectinesterase 53 (A)	BnaA02g04440D [Brassica napus]	RecName: Full=Probable pectinesterase 53; Short=PE 53; EC=3.1.1.11; AltName: Full=Pectin methylesterase 53; Short=AtPME53; Flags: Precursor;	RecName: Full=Pectinesterase {ECO:0000256|RuleBase:RU000589}; EC=3.1.1.11 {ECO:0000256|RuleBase:RU000589};	--	GO:0005618,cell wall; GO:0005737,cytoplasm; GO:0005576,extracellular region; GO:0045330,aspartyl esterase activity; GO:0030599,pectinesterase activity; GO:0042545,cell wall modification; GO:0045490,pectin catabolic process	Transferrin receptor-like dimerisation domain
BnaA02g04470D	19.76	30.52	23.44	58.96	39.34	64.6	-1.038	9.25461e-07	down	K07374 tubulin alpha | (RefSeq) tubulin alpha-3 chain-like (A)	tubulin alpha-3 chain-like [Brassica napus]	RecName: Full=Tubulin alpha-5 chain;	RecName: Full=Tubulin alpha chain {ECO:0000256|RuleBase:RU000352};	Alpha tubulin	GO:0005737,cytoplasm; GO:0005874,microtubule; GO:0005525,GTP binding; GO:0003924,GTPase activity; GO:0005200,structural constituent of cytoskeleton; GO:0007017,microtubule-based process	Tubulin domain
BnaA02g04500D	11.27	14.3	13.22	44.66	30.4	44.95	-1.524	1.53345e-19	down	K20222 importin-5 | (RefSeq) importin-5-like (A)	BnaA02g04500D [Brassica napus]	RecName: Full=Transportin-1; Short=AtTRN1; AltName: Full=Importin beta-2; AltName: Full=Karyopherin beta-2;	SubName: Full=BnaA02g04500D protein {ECO:0000313|EMBL:CDY44945.1};	Karyopherin (importin) beta 3	GO:0005737,cytoplasm; GO:0005829,cytosol; GO:0031965,nuclear membrane; GO:0034399,nuclear periphery; GO:0005654,nucleoplasm; GO:0005634,nucleus; GO:0008139,nuclear localization sequence binding; GO:0008565,protein transporter activity; GO:0008536,Ran GTPase binding; GO:0035280,miRNA loading onto RISC involved in gene silencing by miRNA; GO:0006607,NLS-bearing protein import into nucleus; GO:00511…	PBS lyase HEAT-like repeat
BnaA02g04650D	4.73	5.36	6.17	11.99	12.12	10.83	-1.004	5.09153e-05	down	K00791 tRNA dimethylallyltransferase [EC:2.5.1.75] | (RefSeq) tRNA dimethylallyltransferase 9 (A)	BnaA02g04650D [Brassica napus]	RecName: Full=tRNA dimethylallyltransferase 9; EC=2.5.1.75; AltName: Full=Isopentenyl-diphosphate: tRNA isopentenyltransferase 9; Short=AtIPT9; Short=IPP transferase 9; Short=IPPT 9;	SubName: Full=BnaA02g04650D protein {ECO:0000313|EMBL:CDY45111.1};	tRNA delta(2)-isopentenylpyrophosphate transferase	GO:0005739,mitochondrion; GO:0005524,ATP binding; GO:0052381,tRNA dimethylallyltransferase activity; GO:0009691,cytokinin biosynthetic process; GO:0006400,tRNA modification	IstB-like ATP binding protein
BnaA02g04780D	27.96	41.12	23.56	118.19	110.73	145.91	-1.914	1.3323e-20	down	K06617 raffinose synthase [EC:2.4.1.82] | (RefSeq) probable galactinol--sucrose galactosyltransferase 6 (A)	BnaA02g04780D [Brassica napus]	RecName: Full=Probable galactinol--sucrose galactosyltransferase 6; EC=2.4.1.82; AltName: Full=Protein DARK INDUCIBLE 10; AltName: Full=Raffinose synthase 6;	SubName: Full=BnaA02g04780D protein {ECO:0000313|EMBL:CDY45098.1};	--	GO:0047274,galactinol-sucrose galactosyltransferase activity; GO:0005975,carbohydrate metabolic process	Raffinose synthase or seed imbibition protein Sip1
BnaA02g04790D	17.26	19.55	13.95	7.91	9.46	9.45	1.019	7.38942e-07	up	K07297 adiponectin receptor | (RefSeq) heptahelical transmembrane protein 1-like (A)	heptahelical transmembrane protein 1 [Brassica napus]	RecName: Full=Heptahelical transmembrane protein 1; AltName: Full=PAQR family protein HHP1;	SubName: Full=BnaA02g04790D protein {ECO:0000313|EMBL:CDY45097.1};	Predicted membrane proteins, contain hemolysin III domain	GO:0016021,integral component of membrane; GO:0004872,NA; GO:0009788,negative regulation of abscisic acid-activated signaling pathway; GO:0009725,response to hormone; GO:0009651,response to salt stress; GO:0009744,response to sucrose	Haemolysin-III related
BnaA02g04800D	16.78	20.46	12.21	6.7	3.34	9.37	1.463	3.40885e-06	up	K00696 sucrose-phosphate synthase [EC:2.4.1.14] | (RefSeq) SPS1F; sucrose phosphate synthase 1F (A)	BnaA02g04800D [Brassica napus]	RecName: Full=Sucrose-phosphate synthase 1; EC=2.4.1.14; AltName: Full=Sucrose-phosphate synthase 1F; Short=AtSPS1F; AltName: Full=Sucrose-phosphate synthase 5.1; Short=AtSPS5.1; AltName: Full=UDP-glucose-fructose-phosphate glucosyltransferase;	SubName: Full=BnaA02g04800D protein {ECO:0000313|EMBL:CDY45096.1};	Glycosyltransferase	GO:0005829,cytosol; GO:0005886,plasma membrane; GO:0009506,plasmodesma; GO:0016157,sucrose synthase activity; GO:0046524,sucrose-phosphate synthase activity; GO:0071836,nectar secretion; GO:0005986,sucrose biosynthetic process	Fungal protein of unknown function (DUF1752)
BnaA02g04870D	10.31	11.17	7.68	4.36	5.73	4.03	1.143	1.56804e-06	up	K08193 MFS transporter, ACS family, solute carrier family 17 (sodium-dependent inorganic phosphate cotransporter), other | (RefSeq) probable anion transporter 6, chloroplastic (A)	BnaA02g04870D [Brassica napus]	RecName: Full=Probable anion transporter 6, chloroplastic; AltName: Full=Phosphate transporter PHT4;5; Flags: Precursor;	SubName: Full=BnaA02g04870D protein {ECO:0000313|EMBL:CDY45089.1};	Permease of the major facilitator superfamily	GO:0031969,chloroplast membrane; GO:0016021,integral component of membrane; GO:0009536,plastid; GO:0005315,inorganic phosphate transmembrane transporter activity; GO:0098656,anion transmembrane transport	Carbohydrate binding domain (family 17/28)
BnaA02g05010D	0.62	0.85	1.82	4.44	1.49	5.16	-1.645	0.00843512	down	--	PREDICTED: protein LURP-one-related 16 [Brassica rapa]	RecName: Full=Protein LURP-one-related 16;	SubName: Full=Uncharacterized protein {ECO:0000313|EnsemblPlants:Bra020118.1-P};	--	--	LURP-one-related
BnaA02g05170D	0.48	1.08	0.38	0.14	0.26	0.23	1.712	0.00187964	up	K11817 indole-3-acetaldehyde oxidase [EC:1.2.3.7] | (RefSeq) BrAO1; indole-3-acetaldehyde oxidase (A)	BnaA02g05170D [Brassica napus]	RecName: Full=Indole-3-acetaldehyde oxidase; Short=IAA oxidase; EC=1.2.3.7; AltName: Full=Aldehyde oxidase 1; Short=AO-1; Short=AtAO-1; Short=AtAO1;	SubName: Full=BnaA02g05170D protein {ECO:0000313|EMBL:CDY09091.1};	Xanthine dehydrogenase	GO:0005829,cytosol; GO:0051537,2 iron, 2 sulfur cluster binding; GO:0004031,aldehyde oxidase activity; GO:0009055,electron transfer activity; GO:0050660,flavin adenine dinucleotide binding; GO:0050302,indole-3-acetaldehyde oxidase activity; GO:0005506,iron ion binding; GO:0016614,oxidoreductase activity, acting on CH-OH group of donors; GO:0009688,abscisic acid biosynthetic process; GO:0009851,au…	2Fe-2S iron-sulfur cluster binding domain
BnaA02g05180D	7.78	5.29	6.44	1.45	2.01	2.99	1.686	9.27876e-06	up	K13993 HSP20 family protein | (RefSeq) inactive protein RESTRICTED TEV MOVEMENT 2-like (A)	BnaA02g05180D [Brassica napus]	RecName: Full=Inactive protein RESTRICTED TEV MOVEMENT 2; AltName: Full=Inactive restricted tobacco etch virus movement protein 2;	SubName: Full=BnaA02g05180D protein {ECO:0000313|EMBL:CDY09092.1};	Molecular chaperone (small heat-shock protein Hsp26/Hsp42)	GO:0016021,integral component of membrane; GO:0005886,plasma membrane; GO:0006952,defense response	HSP20-like domain found in ArsA
BnaA02g05230D	16.03	17.53	6.31	4.21	2.16	7.34	1.658	0.000113145	up	K00423 L-ascorbate oxidase [EC:1.10.3.3] | (RefSeq) L-ascorbate oxidase (A)	L-ascorbate oxidase [Brassica napus]	RecName: Full=L-ascorbate oxidase; Short=ASO; Short=Ascorbase; EC=1.10.3.3; Flags: Precursor;	SubName: Full=BnaA02g05230D protein {ECO:0000313|EMBL:CDY09097.1};	Multicopper oxidases	GO:0005576,extracellular region; GO:0005507,copper ion binding; GO:0008447,L-ascorbate oxidase activity	Multicopper oxidase
BnaA02g05240D	7.78	9.73	5.59	3.07	2.93	4.42	1.249	4.94514e-06	up	K00423 L-ascorbate oxidase [EC:1.10.3.3] | (RefSeq) L-ascorbate oxidase-like isoform X1 (A)	BnaA02g05240D [Brassica napus]	RecName: Full=L-ascorbate oxidase; Short=ASO; Short=Ascorbase; EC=1.10.3.3;	SubName: Full=BnaA02g05240D protein {ECO:0000313|EMBL:CDY09098.1};	Multicopper oxidases	GO:0005576,extracellular region; GO:0005507,copper ion binding; GO:0008447,L-ascorbate oxidase activity	Multicopper oxidase
BnaA02g05300D	7.97	8.51	9.76	24.32	23.53	29.84	-1.465	1.68085e-23	down	K18757 la-related protein 1 | (RefSeq) la-related protein 1A-like (A)	BnaA02g05300D [Brassica napus]	RecName: Full=La-related protein 1A; Short=AtLARP1a;	SubName: Full=BnaA02g05300D protein {ECO:0000313|EMBL:CDY09104.1};	RNA-binding protein LARP/SRO9 and related La domain proteins	GO:0005829,cytosol; GO:0000932,P-body; GO:0005844,polysome; GO:0003723,RNA binding; GO:0010286,heat acclimation; GO:0006402,mRNA catabolic process	La domain
BnaA02g05310D	9.33	5.92	12.51	65.58	78.01	74.26	-2.875	4.78841e-32	down	K07199 5'-AMP-activated protein kinase, regulatory beta subunit | (RefSeq) SNF1-related protein kinase regulatory subunit beta-1-like (A)	BnaA02g05310D [Brassica napus]	RecName: Full=SNF1-related protein kinase regulatory subunit beta-1; Short=AKIN subunit beta-1; Short=AKINB1; Short=AKINbeta1;	SubName: Full=BnaA02g05310D protein {ECO:0000313|EMBL:CDY09105.1};	Protein involved in Snf1 protein kinase complex assembly	GO:0005524,ATP binding; GO:0005975,carbohydrate metabolic process; GO:0006633,fatty acid biosynthetic process; GO:0042128,nitrate assimilation	5'-AMP-activated protein kinase beta subunit, interaction domain
BnaA02g05340D	19.91	18.28	11.17	9.76	3.85	7.71	1.327	4.06899e-05	up	K00279 cytokinin dehydrogenase [EC:1.5.99.12] | (RefSeq) cytokinin dehydrogenase 7 (A)	PREDICTED: cytokinin dehydrogenase 7-like [Brassica rapa]	RecName: Full=Cytokinin dehydrogenase 7; EC=1.5.99.12; AltName: Full=Cytokinin oxidase 7; Short=AtCKX5; Short=AtCKX7; Short=CKO7;	SubName: Full=Uncharacterized protein {ECO:0000313|EnsemblPlants:Bra020157.1-P};	Proteins containing the FAD binding domain	GO:0019139,cytokinin dehydrogenase activity; GO:0050660,flavin adenine dinucleotide binding; GO:0016614,oxidoreductase activity, acting on CH-OH group of donors; GO:0009823,cytokinin catabolic process	FAD binding domain
BnaA02g05390D	1.24	0.61	0.7	3.74	2.98	4.91	-2.078	2.49923e-06	down	--	BnaA02g05390D [Brassica napus]	--	SubName: Full=BnaA02g05390D protein {ECO:0000313|EMBL:CDY09113.1};	--	--	--
BnaA02g05470D	2.02	1.25	2.32	4.79	3.61	3.95	-1.039	0.0110622	down	K05284 phosphatidylinositol glycan, class M [EC:2.4.1.-] | (RefSeq) GPI mannosyltransferase 1 (A)	BnaA02g05470D [Brassica napus]	RecName: Full=GPI mannosyltransferase 1; EC=2.4.1.-; AltName: Full=GPI mannosyltransferase I; Short=GPI-MT-I; AltName: Full=Phosphatidylinositol-glycan biosynthesis class M protein; Short=PIG-M; AltName: Full=Protein PEANUT 1;	SubName: Full=BnaA02g05470D protein {ECO:0000313|EMBL:CDY09121.1};	Mannosyltransferase	GO:0005789,endoplasmic reticulum membrane; GO:0016021,integral component of membrane; GO:0016758,transferase activity, transferring hexosyl groups; GO:0006506,GPI anchor biosynthetic process	--
BnaA02g05510D	49.44	23.17	95.34	20.55	12.25	19.91	1.778	0.002527	up	K12581 CCR4-NOT transcription complex subunit 7/8 | (RefSeq) probable CCR4-associated factor 1 homolog 11 (A)	BnaA02g05510D [Brassica napus]	RecName: Full=Probable CCR4-associated factor 1 homolog 11; EC=3.1.13.4;	SubName: Full=BnaA02g05510D protein {ECO:0000313|EMBL:CDY09125.1};	mRNA deadenylase subunit	GO:0030015,CCR4-NOT core complex; GO:0005634,nucleus; GO:0000932,P-body; GO:0008408,3'-5' exonuclease activity; GO:0046872,metal ion binding; GO:0004535,poly(A)-specific ribonuclease activity; GO:0003723,RNA binding; GO:0042742,defense response to bacterium; GO:0043928,exonucleolytic nuclear-transcribed mRNA catabolic process involved in deadenylation-dependent decay; GO:0017148,negative regulati…	CAF1 family ribonuclease
BnaA02g05650D	11.07	4.43	2.02	0.13	0	1.2	3.851	0.0126687	up	--	BnaA02g05650D [Brassica napus]	--	SubName: Full=BnaA02g05650D protein {ECO:0000313|EMBL:CDY09139.1};	--	--	--
BnaA02g05700D	1.42	2.48	2.95	22.72	25.82	25.53	-3.339	7.53602e-43	down	K13356 alcohol-forming fatty acyl-CoA reductase [EC:1.2.1.84] | (RefSeq) fatty acyl-CoA reductase 1-like (A)	BnaA02g05700D [Brassica napus]	RecName: Full=Fatty acyl-CoA reductase 1 {ECO:0000305}; EC=1.2.1.84 {ECO:0000269|PubMed:19062129, ECO:0000269|PubMed:20571114};	RecName: Full=Fatty acyl-CoA reductase {ECO:0000256|RuleBase:RU363097}; EC=1.2.1.84 {ECO:0000256|RuleBase:RU363097};	Acyl-CoA reductase	GO:0009507,chloroplast; GO:0005886,plasma membrane; GO:0102965,alcohol-forming fatty acyl-CoA reductase activity; GO:0080019,fatty-acyl-CoA reductase (alcohol-forming) activity; GO:0050062,long-chain-fatty-acyl-CoA reductase activity; GO:0006629,lipid metabolic process; GO:0035336,long-chain fatty-acyl-CoA metabolic process; GO:0009651,response to salt stress; GO:0009611,response to wounding; GO:…	RmlD substrate binding domain
BnaA02g05840D	44.34	67.55	76.48	200.95	182.08	216.92	-1.573	6.47838e-17	down	K11276 nucleophosmin 1 | (RefSeq) histone deacetylase HDT1-like (A)	BnaA02g05840D [Brassica napus]	RecName: Full=Histone deacetylase HDT2; AltName: Full=HD-tuins protein 2; AltName: Full=Histone deacetylase 2b;	SubName: Full=BnaA02g05840D protein {ECO:0000313|EMBL:CDY09158.1};	--	GO:0005618,cell wall; GO:0005829,cytosol; GO:0005739,mitochondrion; GO:0005730,nucleolus; GO:0005634,nucleus; GO:0005774,vacuolar membrane; GO:0004407,histone deacetylase activity; GO:0009294,DNA mediated transformation; GO:0045892,negative regulation of transcription, DNA-templated; GO:0009944,polarity specification of adaxial/abaxial axis; GO:0048364,root development; GO:0010162,seed dormancy p…	Nucleoplasmin-like domain
BnaA02g05990D	41.14	43.63	30.92	16.44	19.11	19.34	1.175	3.14281e-11	up	K01285 lysosomal Pro-X carboxypeptidase [EC:3.4.16.2] | (RefSeq) lysosomal Pro-X carboxypeptidase-like (A)	BnaA02g05990D [Brassica napus]	RecName: Full=Probable serine protease EDA2; EC=3.4.-.-; AltName: Full=Protein EMBRYO SAC DEVELOPMENT ARREST 2; Flags: Precursor;	SubName: Full=BnaA02g05990D protein {ECO:0000313|EMBL:CDY09173.1};	Prolylcarboxypeptidase (angiotensinase C)	GO:0005576,extracellular region; GO:0008239,dipeptidyl-peptidase activity; GO:0008236,serine-type peptidase activity; GO:0009561,megagametogenesis; GO:0006508,proteolysis	alpha/beta hydrolase fold
BnaA02g06130D	1.27	1.33	1.77	3.63	4.92	5.8	-1.619	9.09184e-07	down	K01551 arsenite/tail-anchored protein-transporting ATPase [EC:3.6.3.16 3.6.3.-] | (RefSeq) ATPase ASNA1 homolog 2-like (A)	BnaA02g06130D [Brassica napus]	RecName: Full=ATPase ARSA1 {ECO:0000305}; Short=Cr-ArsA1 {ECO:0000303|PubMed:28382961}; EC=3.6.-.- {ECO:0000305}; AltName: Full=Arsenical pump-driving ATPase homolog 1 {ECO:0000305}; AltName: Full=Arsenite-stimulated ATPase homolog 1 {ECO:0000305}; AltName: Full=Protein ANTENNA SIZE MUTANT 1 {ECO:0000303|PubMed:23167510};	SubName: Full=BnaA02g06130D protein {ECO:0000313|EMBL:CDY09187.1};	Putative arsenite-translocating ATPase	GO:0005829,cytosol; GO:0005524,ATP binding; GO:0016887,ATPase activity	KaiC
BnaA02g06220D	1.12	0.73	1.52	2.5	5.62	2.68	-1.595	0.0040539	down	K08681 5'-phosphate synthase pdxT subunit [EC:4.3.3.6] | (RefSeq) probable pyridoxal 5'-phosphate synthase subunit PDX2 (A)	BnaA02g06220D [Brassica napus]	RecName: Full=Probable pyridoxal 5'-phosphate synthase subunit PDX2; Short=AtPDX2; EC=4.3.3.6 {ECO:0000269|PubMed:17468224}; AltName: Full=Protein EMBRYO DEFECTIVE 2407; AltName: Full=Pyridoxal 5'-phosphate synthase glutaminase subunit; EC=3.5.1.2 {ECO:0000269|PubMed:17468224};	SubName: Full=BnaA02g06220D protein {ECO:0000313|EMBL:CDY09196.1};	Imidazoleglycerol-phosphate synthase subunit H-like	GO:0005829,cytosol; GO:1903600,glutaminase complex; GO:0004359,glutaminase activity; GO:0046982,protein heterodimerization activity; GO:0036381,pyridoxal 5'-phosphate synthase (glutamine hydrolysing) activity; GO:0006541,glutamine metabolic process; GO:0042823,pyridoxal phosphate biosynthetic process; GO:0008614,pyridoxine metabolic process; GO:0042819,vitamin B6 biosynthetic process	Peptidase family S51
BnaA02g06380D	5.73	5.14	6.09	3.14	2.37	3.17	1.069	1.63923e-07	up	K17815 exonuclease V [EC:3.1.-.-] | (RefSeq) exonuclease V, chloroplastic-like isoform X1 (A)	BnaA02g06380D [Brassica napus]	RecName: Full=Exonuclease V, chloroplastic; Short=Exo V; EC=3.1.-.-; Flags: Precursor;	SubName: Full=BnaA02g06380D protein {ECO:0000313|EMBL:CDY09212.1};	Uncharacterized conserved protein	GO:0009507,chloroplast; GO:0051539,4 iron, 4 sulfur cluster binding; GO:0003677,DNA binding; GO:0046872,metal ion binding; GO:0045145,single-stranded DNA 5'-3' exodeoxyribonuclease activity	PD-(D/E)XK nuclease superfamily
BnaA02g06550D	6.93	6.66	4.13	2.18	1.75	2.56	1.551	1.37117e-07	up	--	BnaA02g06550D [Brassica napus]	RecName: Full=BTB/POZ domain-containing protein At5g60050;	SubName: Full=BnaA02g06550D protein {ECO:0000313|EMBL:CDY09229.1};	--	GO:0016567,protein ubiquitination	BTB/POZ domain
BnaA02g06840D	2.27	3.46	2.9	6.05	5.57	7.62	-1.058	3.43409e-05	down	--	BnaA02g06840D [Brassica napus]	RecName: Full=Protein UPSTREAM OF FLC;	SubName: Full=BnaA02g06840D protein {ECO:0000313|EMBL:CDY65697.1};	--	--	Transcription factor PAP1
BnaA02g06860D	16.24	10.65	12.49	3.12	2.94	3.35	2.167	3.59602e-22	up	K14652 3,4-dihydroxy 2-butanone 4-phosphate synthase / GTP cyclohydrolase II [EC:4.1.99.12 3.5.4.25] | (RefSeq) monofunctional riboflavin biosynthesis protein RIBA 3, chloroplastic (A)	BnaA02g06860D [Brassica napus]	RecName: Full=Monofunctional riboflavin biosynthesis protein RIBA 3, chloroplastic; Includes: RecName: Full=Inactive 3,4-dihydroxy-2-butanone 4-phosphate synthase; Short=DHBP synthase; Includes: RecName: Full=GTP cyclohydrolase-2; EC=3.5.4.25; AltName: Full=GTP cyclohydrolase II; Flags: Precursor;	SubName: Full=BnaA02g06860D protein {ECO:0000313|EMBL:CDY60560.1};	Bifunctional GTP cyclohydrolase II/3,4-dihydroxy-2butanone-4-phosphate synthase	GO:0009507,chloroplast; GO:0008686,3,4-dihydroxy-2-butanone-4-phosphate synthase activity; GO:0005525,GTP binding; GO:0003935,GTP cyclohydrolase II activity; GO:0046872,metal ion binding; GO:0009231,riboflavin biosynthetic process	3,4-dihydroxy-2-butanone 4-phosphate synthase
BnaA02g07080D	0	0	0	0	1.09	0.06	-5.673	0.0126148	down	K10355 actin, other eukaryote | (RefSeq) actin-12-like (A)	PREDICTED: actin-12-like [Brassica oleracea var. oleracea]	RecName: Full=Actin-12;	SubName: Full=Uncharacterized protein {ECO:0000313|EnsemblPlants:Bo2g026760.1};	Actin and related proteins	GO:0009941,chloroplast envelope; GO:0009570,chloroplast stroma; GO:0005856,cytoskeleton; GO:0005739,mitochondrion; GO:0005524,ATP binding; GO:0005200,structural constituent of cytoskeleton	Actin
BnaA02g07110D	86.51	77.2	28.45	14.15	11.98	23.68	2.061	2.69366e-08	up	--	BnaA02g07110D [Brassica napus]	RecName: Full=Non-specific lipid-transfer protein 4; Short=LTP 4; Flags: Precursor;	RecName: Full=Non-specific lipid-transfer protein {ECO:0000256|RuleBase:RU000628};	--	GO:0016020,membrane; GO:0008289,lipid binding; GO:0006869,lipid transport; GO:0009737,response to abscisic acid; GO:0009651,response to salt stress; GO:0009414,response to water deprivation	Probable lipid transfer
BnaA02g07120D	359.61	232.76	189.03	64.4	45.05	52.53	2.379	2.90334e-23	up	--	BnaA02g07120D [Brassica napus]	RecName: Full=Non-specific lipid-transfer protein 4; Short=LTP 4; Flags: Precursor;	RecName: Full=Non-specific lipid-transfer protein {ECO:0000256|RuleBase:RU000628};	--	GO:0016020,membrane; GO:0008289,lipid binding; GO:0006869,lipid transport; GO:0009737,response to abscisic acid; GO:0009651,response to salt stress; GO:0009414,response to water deprivation	Protease inhibitor/seed storage/LTP family
BnaA02g07190D	5.49	5.88	3.98	1.32	1.57	0.82	2.158	3.70699e-09	up	--	BnaA02g07190D [Brassica napus]	--	SubName: Full=BnaA02g07190D protein {ECO:0000313|EMBL:CDY32657.1};	--	--	--
BnaA02g07210D	14.59	12.82	9.71	31.13	22.31	32.39	-1.102	5.5511e-07	down	--	PREDICTED: uncharacterized protein LOC103851594 [Brassica rapa]	--	SubName: Full=Uncharacterized protein {ECO:0000313|EnsemblPlants:Bra020332.1-P};	--	--	--
BnaA02g07230D	0.33	0.81	0.53	2.73	1.54	3.66	-2.143	0.00014076	down	K07904 Ras-related protein Rab-11A | (RefSeq) ras-related protein RABA2d-like (A)	PREDICTED: ras-related protein RABA2d-like [Brassica oleracea var. oleracea]	RecName: Full=Ras-related protein RABA2d; Short=AtRABA2d;	SubName: Full=Uncharacterized protein {ECO:0000313|EnsemblPlants:Bo2g026960.1};	GTPase Rab11/YPT3, small G protein superfamily	GO:0009504,cell plate; GO:0005768,endosome; GO:0010008,endosome membrane; GO:0005794,Golgi apparatus; GO:0005886,plasma membrane; GO:0005525,GTP binding; GO:0003924,GTPase activity; GO:0042546,cell wall biogenesis; GO:0015031,protein transport	Domain of unknown function (DUF4623)
BnaA02g07320D	10.21	12.15	15.51	65.71	73.18	76.04	-2.408	4.60372e-45	down	K14500 BR-signaling kinase [EC:2.7.11.1] | (RefSeq) probable serine/threonine-protein kinase BSK3 isoform X2 (A)	BnaA02g07320D [Brassica napus]	RecName: Full=Serine/threonine-protein kinase BSK5 {ECO:0000305}; EC=2.7.11.1 {ECO:0000305}; AltName: Full=Brassinosteroid-signaling kinase 5 {ECO:0000303|PubMed:18653891};	SubName: Full=BnaA02g07320D protein {ECO:0000313|EMBL:CDY32670.1};	--	GO:0005886,plasma membrane; GO:0009506,plasmodesma; GO:0005524,ATP binding; GO:0004675,transmembrane receptor protein serine/threonine kinase activity; GO:0009742,brassinosteroid mediated signaling pathway; GO:0007166,cell surface receptor signaling pathway; GO:0006468,protein phosphorylation; GO:0009737,response to abscisic acid; GO:0009409,response to cold; GO:0009651,response to salt stress	Protein kinase domain
BnaA02g07470D	7.77	4.06	3.27	0	0	0.21	6.065	8.5329e-13	up	K11778 ditrans,polycis-polyprenyl diphosphate synthase [EC:2.5.1.87] | (RefSeq) dehydrodolichyl diphosphate synthase 2-like (A)	PREDICTED: dehydrodolichyl diphosphate synthase 2-like [Brassica rapa]	RecName: Full=Dehydrodolichyl diphosphate synthase 2; Short=Dedol-PP synthase 2; EC=2.5.1.-;	RecName: Full=Alkyl transferase {ECO:0000256|RuleBase:RU363018}; EC=2.5.1.- {ECO:0000256|RuleBase:RU363018};	Cis-prenyltransferase	GO:0009507,chloroplast; GO:0009570,chloroplast stroma; GO:0005829,cytosol; GO:0002094,polyprenyltransferase activity; GO:0009668,plastid membrane organization; GO:0016094,polyprenol biosynthetic process; GO:0006486,protein glycosylation	Putative undecaprenyl diphosphate synthase
BnaA02g07620D	15.32	20.33	21.7	37.28	34.61	51.19	-1	5.16574e-07	down	K02987 small subunit ribosomal protein S4e | (RefSeq) 40S ribosomal protein S4-1-like (A)	BnaA02g07620D [Brassica napus]	RecName: Full=40S ribosomal protein S4-2;	RecName: Full=40S ribosomal protein S4 {ECO:0000256|PIRNR:PIRNR002116};	40S ribosomal protein S4	GO:0022626,cytosolic ribosome; GO:0022627,cytosolic small ribosomal subunit; GO:0005774,vacuolar membrane; GO:0003729,mRNA binding; GO:0003723,RNA binding; GO:0019843,rRNA binding; GO:0003735,structural constituent of ribosome; GO:0006412,translation	S4 domain
BnaA02g07730D	14.18	13.79	7.09	4.12	3.32	6.51	1.438	1.25173e-05	up	K00051 malate dehydrogenase (NADP+) [EC:1.1.1.82] | (RefSeq) malate dehydrogenase [NADP], chloroplastic-like (A)	BnaA02g07730D [Brassica napus]	RecName: Full=Malate dehydrogenase [NADP], chloroplastic {ECO:0000305}; EC=1.1.1.82 {ECO:0000305}; AltName: Full=NADP-MDH {ECO:0000305}; Flags: Precursor;	SubName: Full=BnaA02g07730D protein {ECO:0000313|EMBL:CDY32711.1};	Malate dehydrogenase	GO:0048046,apoplast; GO:0009507,chloroplast; GO:0009941,chloroplast envelope; GO:0009570,chloroplast stroma; GO:0005739,mitochondrion; GO:0009579,thylakoid; GO:0030060,L-malate dehydrogenase activity; GO:0046554,malate dehydrogenase (NADP+) activity; GO:0008746,NAD(P)+ transhydrogenase activity; GO:0005975,carbohydrate metabolic process; GO:0006108,malate metabolic process; GO:0006734,NADH metabo…	lactate/malate dehydrogenase, NAD binding domain
BnaA02g07740D	26.73	21.92	23.32	14.44	5.56	5.36	1.617	4.24096e-06	up	K13544 pheophorbidase [EC:3.1.1.82] | (RefSeq) pheophorbidase isoform X1 (A)	BnaA02g07740D [Brassica napus]	RecName: Full=Methylesterase 18; Short=AtMES18; EC=3.1.1.-;	SubName: Full=BnaA02g07740D protein {ECO:0000313|EMBL:CDY32712.1};	--	GO:0016788,hydrolase activity, acting on ester bonds; GO:0080030,methyl indole-3-acetate esterase activity	Serine hydrolase
BnaA02g08090D	79.59	78.09	59.18	14.95	22.25	19.24	2.038	9.49875e-25	up	K15404 aldehyde decarbonylase [EC:4.1.99.5] | (RefSeq) CER1-1; hypothetical protein (A)	BnaA02g08090D [Brassica napus]	RecName: Full=Protein ECERIFERUM 3; AltName: Full=Protein FACELESS POLLEN 1; AltName: Full=Protein WAX2; AltName: Full=Protein YORE-YORE;	SubName: Full=BnaA02g08090D protein {ECO:0000313|EMBL:CDY32747.1};	--	GO:0005789,endoplasmic reticulum membrane; GO:0016021,integral component of membrane; GO:0016020,membrane; GO:0005886,plasma membrane; GO:0005506,iron ion binding; GO:0016491,oxidoreductase activity; GO:0043447,alkane biosynthetic process; GO:0042335,cuticle development; GO:0006723,cuticle hydrocarbon biosynthetic process; GO:0008610,lipid biosynthetic process; GO:0006629,lipid metabolic process;…	short chain dehydrogenase
BnaA02g08480D	1.35	1.67	1.4	2.37	7.23	3.16	-1.451	0.000634209	down	K12309 beta-galactosidase [EC:3.2.1.23] | (RefSeq) LOW QUALITY PROTEIN: beta-galactosidase 2 (A)	BnaA02g08480D [Brassica napus]	RecName: Full=Beta-galactosidase 4; Short=Lactase 4; EC=3.2.1.23; Flags: Precursor;	RecName: Full=Beta-galactosidase {ECO:0000256|RuleBase:RU000675}; EC=3.2.1.23 {ECO:0000256|RuleBase:RU000675};	Beta-galactosidase	GO:0048046,apoplast; GO:0005618,cell wall; GO:0005773,vacuole; GO:0004565,beta-galactosidase activity; GO:0005975,carbohydrate metabolic process	Beta-galactosidase jelly roll domain
BnaA02g08790D	19.53	17.43	19.08	6.93	7.49	5.75	1.578	1.44686e-12	up	--	BnaA02g08790D [Brassica napus]	RecName: Full=Putative 4-hydroxy-4-methyl-2-oxoglutarate aldolase 3; Short=HMG aldolase 3; EC=4.1.3.17; AltName: Full=Oxaloacetate decarboxylase; Short=OAA decarboxylase; EC=4.1.1.3; AltName: Full=Regulator of ribonuclease activity homolog 3; AltName: Full=RraA-like protein 3;	RecName: Full=4-hydroxy-4-methyl-2-oxoglutarate aldolase {ECO:0000256|RuleBase:RU004338}; Short=HMG aldolase {ECO:0000256|RuleBase:RU004338}; EC=4.1.1.3 {ECO:0000256|RuleBase:RU004338}; EC=4.1.3.17 {ECO:0000256|RuleBase:RU004338}; AltName: Full=Oxaloacetate decarboxylase {ECO:0000256|RuleBase:RU004338};	--	GO:0047443,4-hydroxy-4-methyl-2-oxoglutarate aldolase activity; GO:0046872,metal ion binding; GO:0008948,oxaloacetate decarboxylase activity; GO:0008428,ribonuclease inhibitor activity; GO:0051252,regulation of RNA metabolic process	Aldolase/RraA
BnaA02g08820D	68.27	93.07	55.67	30.68	26.77	23.79	1.517	7.93154e-14	up	K04079 molecular chaperone HtpG | (RefSeq) heat shock protein 90-2-like (A)	BnaA02g08820D [Brassica napus]	RecName: Full=Heat shock protein 90-2 {ECO:0000305}; Short=AtHSP90.2 {ECO:0000305}; Short=AtHsp90-2 {ECO:0000303|PubMed:11599565}; AltName: Full=Heat shock protein 81-2 {ECO:0000305}; Short=Hsp81-2 {ECO:0000303|PubMed:11599565}; AltName: Full=Protein EARLY-RESPONSIVE TO DEHYDRATION 8; AltName: Full=Protein LOSS OF RECOGNITION OF AVRRPM1 2; AltName: Full=Protein MUTANT SNC1-ENHANCING 12 {ECO:00003…	SubName: Full=BnaA02g08820D protein {ECO:0000313|EMBL:CDY20742.1};	Molecular chaperone (HSP90 family)	GO:0005737,cytoplasm; GO:0005524,ATP binding; GO:0016887,ATPase activity; GO:0051082,unfolded protein binding; GO:0061077,chaperone-mediated protein folding; GO:0009816,defense response to bacterium, incompatible interaction	Myc amino-terminal region
BnaA02g09000D	1.77	3.94	4.37	1.21	1.39	1.83	1.278	0.000622571	up	K10400 kinesin family member 15 | (RefSeq) kinesin-like protein KIN12B isoform X1 (A)	BnaA02g09000D [Brassica napus]	RecName: Full=Kinesin-like protein KIN-12F {ECO:0000305};	SubName: Full=BnaA02g09000D protein {ECO:0000313|EMBL:CDY20760.1};	--	GO:0005871,kinesin complex; GO:0005874,microtubule; GO:0005524,ATP binding; GO:0008574,ATP-dependent microtubule motor activity, plus-end-directed; GO:0008017,microtubule binding; GO:0007018,microtubule-based movement	--
BnaA02g09270D	1.77	3.06	4.52	8.02	6.75	9.45	-1.273	6.0962e-05	down	K14190 GDP-L-galactose phosphorylase [EC:2.7.7.69] | (RefSeq) GDP-L-galactose phosphorylase 2-like (A)	BnaA02g09270D [Brassica napus]	RecName: Full=GDP-L-galactose phosphorylase 2; EC=2.7.7.69; AltName: Full=Protein VITAMIN C DEFECTIVE 5;	SubName: Full=BnaA02g09270D protein {ECO:0000313|EMBL:CDY20787.1};	Predicted hydrolase (HIT family)	GO:0005737,cytoplasm; GO:0005634,nucleus; GO:0010475,galactose-1-phosphate guanylyltransferase (GDP) activity; GO:0080048,GDP-D-glucose phosphorylase activity; GO:0080047,GDP-L-galactose phosphorylase activity; GO:0005085,guanyl-nucleotide exchange factor activity; GO:0016787,hydrolase activity; GO:0000166,nucleotide binding; GO:0080046,quercetin 4'-O-glucosyltransferase activity; GO:0006006,gluc…	Domain of unknown function (DUF4922)
BnaA02g09370D	28.41	30.83	23.83	6.39	1.73	7.3	2.549	5.67545e-06	up	K00928 aspartate kinase [EC:2.7.2.4] | (RefSeq) aspartokinase 3, chloroplastic-like (A)	BnaA02g09370D [Brassica napus]	RecName: Full=Aspartokinase 3, chloroplastic; EC=2.7.2.4; AltName: Full=Aspartate kinase 3; Flags: Precursor;	SubName: Full=BnaA02g09370D protein {ECO:0000313|EMBL:CDY20797.1};	Aspartate kinase	GO:0009570,chloroplast stroma; GO:0004072,aspartate kinase activity; GO:0005524,ATP binding; GO:0009089,lysine biosynthetic process via diaminopimelate; GO:0009088,threonine biosynthetic process	ACT domain
BnaA02g09590D	39.59	16.01	79.1	10.94	6.26	10.08	2.409	8.44586e-08	up	K16465 centrin-1 | (RefSeq) calcium-binding protein PBP1-like (A)	BnaA02g09590D [Brassica napus]	RecName: Full=Calcium-binding protein PBP1; AltName: Full=KIC-related protein 2; AltName: Full=PINOID-binding protein 1;	SubName: Full=BnaA02g09590D protein {ECO:0000313|EMBL:CDY28767.1};	Ca2+-binding protein (centrin/caltractin), EF-Hand superfamily protein	GO:0005509,calcium ion binding; GO:0009733,response to auxin	EF hand
BnaA02g09870D	0.18	0.06	0.47	0.34	3.58	0.78	-2.66	0.00401415	down	K13412 calcium-dependent protein kinase [EC:2.7.11.1] | (RefSeq) hypothetical protein (A)	BnaA02g09870D [Brassica napus]	RecName: Full=Hypersensitive-induced response protein 3; Short=AtHIR3;	SubName: Full=BnaA02g09870D protein {ECO:0000313|EMBL:CDY28795.1};	Prohibitins and stomatins of the PID superfamily	GO:0016020,membrane; GO:0005739,mitochondrion; GO:0005886,plasma membrane; GO:0009506,plasmodesma; GO:0005774,vacuolar membrane; GO:0005773,vacuole; GO:0002239,response to oomycetes	Domain of unknown function (DUF4820)
BnaA02g09960D	9.79	6.14	4.85	0.6	1.4	1.25	2.771	3.15497e-12	up	K00815 tyrosine aminotransferase [EC:2.6.1.5] | (RefSeq) probable aminotransferase TAT2 (A)	BnaA02g09960D [Brassica napus]	RecName: Full=Probable aminotransferase TAT2; EC=2.6.1.-; AltName: Full=Tyrosine aminotransferase 2;	SubName: Full=BnaA02g09960D protein {ECO:0000313|EMBL:CDY28804.1};	Tyrosine aminotransferase	GO:0005829,cytosol; GO:0004838,L-tyrosine:2-oxoglutarate aminotransferase activity; GO:0030170,pyridoxal phosphate binding; GO:0006572,tyrosine catabolic process; GO:0010189,vitamin E biosynthetic process	Beta-eliminating lyase
BnaA02g10450D	11.35	8.38	9.78	3.93	3.81	3.45	1.503	2.00377e-11	up	K00797 spermidine synthase [EC:2.5.1.16] | (RefSeq) spermine synthase (A)	BnaA02g10450D [Brassica napus]	RecName: Full=Spermine synthase; Short=SPMSY; EC=2.5.1.22; AltName: Full=Spermidine aminopropyltransferase;	SubName: Full=BnaA02g10450D protein {ECO:0000313|EMBL:CDY27025.1};	Spermidine synthase	GO:0016768,spermine synthase activity; GO:0006597,spermine biosynthetic process	Methyltransferase small domain
BnaA02g10860D	1.77	2.14	2.2	1.19	0.75	0.96	1.177	0.00156568	up	K03327 multidrug resistance protein, MATE family | (RefSeq) protein DETOXIFICATION 16 (A)	BnaA02g10860D [Brassica napus]	RecName: Full=Protein DETOXIFICATION 16 {ECO:0000303|PubMed:11739388}; Short=AtDTX16 {ECO:0000303|PubMed:11739388}; AltName: Full=Multidrug and toxic compound extrusion protein 16 {ECO:0000305}; Short=MATE protein 16 {ECO:0000305};	RecName: Full=Protein DETOXIFICATION {ECO:0000256|RuleBase:RU004914}; AltName: Full=Multidrug and toxic compound extrusion protein {ECO:0000256|RuleBase:RU004914};	Uncharacterized membrane protein, predicted efflux pump	GO:0016021,integral component of membrane; GO:0005774,vacuolar membrane; GO:0015297,antiporter activity; GO:0015238,drug transmembrane transporter activity; GO:0006855,drug transmembrane transport; GO:0009624,response to nematode	MatE
BnaA02g10880D	5.73	4.02	6.52	2.46	1.94	2.51	1.335	4.0844e-05	up	K13496 UDP-glucosyl transferase 73C [EC:2.4.1.-] | (RefSeq) scopoletin glucosyltransferase (A)	BnaA02g10880D [Brassica napus]	--	SubName: Full=BnaA02g10880D protein {ECO:0000313|EMBL:CDY27068.1};	--	--	--
BnaA02g10950D	2.57	2.44	1.85	0.97	0.71	0.8	1.573	3.07675e-05	up	K05765 cofilin | (RefSeq) actin-depolymerizing factor 12 (A)	BnaA02g10950D [Brassica napus]	RecName: Full=Actin-depolymerizing factor 12; Short=ADF-12; Short=AtADF12;	SubName: Full=BnaA02g10950D protein {ECO:0000313|EMBL:CDY27075.1};	--	GO:0005884,actin filament; GO:0048046,apoplast; GO:0005737,cytoplasm; GO:0003779,actin binding; GO:0030042,actin filament depolymerization; GO:0009860,pollen tube growth	Cofilin/tropomyosin-type actin-binding protein
BnaA02g10970D	84.78	84.33	114.77	55.36	30.24	56.82	1.104	8.3308e-07	up	--	BnaA02g10970D [Brassica napus]	RecName: Full=Low-temperature-induced 65 kDa protein; AltName: Full=Desiccation-responsive protein 29B;	SubName: Full=BnaA02g10970D protein {ECO:0000313|EMBL:CDY27077.1};	--	GO:0009738,abscisic acid-activated signaling pathway; GO:0010150,leaf senescence; GO:0009737,response to abscisic acid; GO:0009409,response to cold; GO:0009651,response to salt stress; GO:0009414,response to water deprivation	--
BnaA02g10980D	7.55	4.35	4.55	0.45	0.42	1.07	3.171	5.8885e-14	up	--	BnaA02g10980D [Brassica napus]	RecName: Full=Low-temperature-induced 65 kDa protein; AltName: Full=Desiccation-responsive protein 29B;	SubName: Full=BnaA02g10980D protein {ECO:0000313|EMBL:CDY27078.1};	--	GO:0009738,abscisic acid-activated signaling pathway; GO:0010150,leaf senescence; GO:0009737,response to abscisic acid; GO:0009409,response to cold; GO:0009651,response to salt stress; GO:0009414,response to water deprivation	Securin sister-chromatid separation inhibitor
BnaA02g11050D	26.23	20.59	30.04	9.58	11.07	11.47	1.357	4.80952e-13	up	K09555 BCL2-associated athanogene 1 | (RefSeq) uncharacterized LOC100800041 (A)	BnaA02g11050D [Brassica napus]	RecName: Full=BAG family molecular chaperone regulator 1; AltName: Full=Bcl-2-associated athanogene 1;	SubName: Full=BnaA02g11050D protein {ECO:0000313|EMBL:CDY27085.1};	BCL2-associated athanogene-like proteins and related BAG family chaperone regulators	GO:0005829,cytosol; GO:0005739,mitochondrion; GO:0005634,nucleus; GO:0051087,chaperone binding; GO:0071629,cytoplasm protein quality control by the ubiquitin-proteasome system	Ubiquitin-like domain
BnaA02g11080D	28.44	22.6	26.62	4.98	7.73	4.67	2.255	9.04837e-21	up	K03781 catalase [EC:1.11.1.6] | (RefSeq) catalase-domain-containing protein (A)	BnaA02g11080D [Brassica napus]	--	SubName: Full=BnaA02g11080D protein {ECO:0000313|EMBL:CDY27088.1};	Uncharacterized conserved protein, contains TraB domain	--	TraB family
BnaA02g11150D	0.63	0.48	1.41	0.34	0.18	0.29	1.74	0.00819225	up	K15631 molybdenum cofactor sulfurtransferase [EC:2.8.1.9] | (RefSeq) molybdenum cofactor sulfurase-like (A)	BnaA02g11150D [Brassica napus]	RecName: Full=Molybdenum cofactor sulfurase {ECO:0000255|HAMAP-Rule:MF_03050}; Short=MCS {ECO:0000255|HAMAP-Rule:MF_03050}; Short=MOS {ECO:0000255|HAMAP-Rule:MF_03050}; Short=MoCo sulfurase {ECO:0000255|HAMAP-Rule:MF_03050}; EC=2.8.1.9 {ECO:0000255|HAMAP-Rule:MF_03050}; AltName: Full=Molybdenum cofactor sulfurase-like protein 3 {ECO:0000255|HAMAP-Rule:MF_03050}; AltName: Full=Molybdenum cofactor …	SubName: Full=BnaA02g11150D protein {ECO:0000313|EMBL:CDY27095.1};	Molybdenum cofactor sulfurase	GO:0008265,Mo-molybdopterin cofactor sulfurase activity; GO:0102867,molybdenum cofactor sulfurtransferase activity; GO:0030151,molybdenum ion binding; GO:0030170,pyridoxal phosphate binding; GO:0006777,Mo-molybdopterin cofactor biosynthetic process	Aminotransferase class-V
BnaA02g11920D	8.66	5.09	4.86	0.48	1.19	0.38	3.289	1.27762e-11	up	--	BnaA02g11920D [Brassica napus]	--	SubName: Full=BnaA02g11920D protein {ECO:0000313|EMBL:CDY16388.1};	--	--	--
BnaA02g12010D	15.89	10.44	12.61	6.12	5.66	4.57	1.356	8.70042e-08	up	--	uncharacterized protein BNAA02G12010D [Brassica napus]	--	SubName: Full=BnaA02g12010D protein {ECO:0000313|EMBL:CDY16397.1};	--	--	Uncharacterized conserved protein (DUF2358)
BnaA02g12130D	19.87	17.37	11.34	0.06	0.13	0.05	7.848	1.07087e-23	up	K16223 protein FLOWERING LOCUS T | (RefSeq) protein FLOWERING LOCUS T (A)	protein FLOWERING LOCUS T [Brassica napus]	RecName: Full=Protein FLOWERING LOCUS T {ECO:0000303|PubMed:10583960};	SubName: Full=BnaA02g12130D protein {ECO:0000313|EMBL:CDY16409.1};	Phosphatidylethanolamine binding protein	GO:0005737,cytoplasm; GO:0005783,endoplasmic reticulum; GO:0005634,nucleus; GO:0008429,phosphatidylethanolamine binding; GO:0030154,cell differentiation; GO:0009908,flower development; GO:0048573,photoperiodism, flowering; GO:0009911,positive regulation of flower development; GO:0009909,regulation of flower development; GO:0010119,regulation of stomatal movement	Phosphatidylethanolamine-binding protein
BnaA02g12150D	3.7	2.76	1.97	0.32	0.64	0.5	2.633	9.75468e-08	up	K08070 2-alkenal reductase [EC:1.3.1.74] | (RefSeq) 2-alkenal reductase (NADP(+)-dependent)-like (A)	BnaA02g12150D [Brassica napus]	RecName: Full=2-alkenal reductase (NADP(+)-dependent); EC=1.3.1.102 {ECO:0000269|PubMed:17945329, ECO:0000269|Ref.3, ECO:0000269|Ref.4}; AltName: Full=Alkenal double bound reductase; AltName: Full=Allylic alcohol dehydrogenase 1 {ECO:0000303|PubMed:11117876}; Short=allyl-ADH1 {ECO:0000303|PubMed:11117876}; AltName: Full=Flavin-free double bond reductase {ECO:0000303|Ref.4}; Short=NtDBR; AltName: …	SubName: Full=BnaA02g12150D protein {ECO:0000313|EMBL:CDY16411.1};	Predicted NAD-dependent oxidoreductase	GO:0016491,oxidoreductase activity	Zinc-binding dehydrogenase
BnaA02g12280D	11.46	16.6	13.87	28.35	41.91	34.97	-1.236	2.31079e-09	down	K17839 polyamine oxidase [EC:1.5.3.17 1.5.3.-] | (RefSeq) probable polyamine oxidase 4 (A)	BnaA02g12280D [Brassica napus]	RecName: Full=Probable polyamine oxidase 4; Short=AtPAO4; EC=1.5.3.16; AltName: Full=Amine oxidase 2;	SubName: Full=BnaA02g12280D protein {ECO:0000313|EMBL:CDY16424.1};	Amine oxidase	GO:0005777,peroxisome; GO:0052895,N1-acetylspermine:oxygen oxidoreductase (N1-acetylspermidine-forming) activity; GO:0052894,norspermine:oxygen oxidoreductase activity; GO:0046592,polyamine oxidase activity; GO:0052901,spermine:oxygen oxidoreductase (spermidine-forming) activity; GO:0006598,polyamine catabolic process	Lycopene cyclase protein
BnaA02g12430D	55.09	65.72	56.11	20.62	28.74	26.55	1.316	2.11641e-14	up	K01915 glutamine synthetase [EC:6.3.1.2] | (RefSeq) glutamine synthetase cytosolic isozyme 1-2 (A)	glutamine [Brassica napus]	RecName: Full=Glutamine synthetase cytosolic isozyme 1-2; EC=6.3.1.2; AltName: Full=Glutamate--ammonia ligase GLN1;2; Short=GLN1;2;	RecName: Full=Glutamine synthetase {ECO:0000256|RuleBase:RU004356}; EC=6.3.1.2 {ECO:0000256|RuleBase:RU004356};	Glutamine synthetase	GO:0005737,cytoplasm; GO:0005524,ATP binding; GO:0004356,glutamate-ammonia ligase activity; GO:0006542,glutamine biosynthetic process; GO:0009399,nitrogen fixation	Glutamine synthetase, beta-Grasp domain
BnaA02g12540D	2.6	3.29	5.16	1.63	1.45	1.74	1.295	2.85561e-05	up	K22546 juvenile hormone-III synthase [EC:2.1.1.325] | (RefSeq) S-adenosyl-L-methionine:carboxyl methyltransferase family protein (A)	PREDICTED: probable S-adenosylmethionine-dependent methyltransferase At5g37990 [Brassica rapa]	RecName: Full=Farnesoic acid carboxyl-O-methyltransferase {ECO:0000303|PubMed:16165084}; EC=2.1.1.325 {ECO:0000269|PubMed:16165084}; AltName: Full=SABATH methyltransferase FAMT {ECO:0000305};	SubName: Full=Uncharacterized protein {ECO:0000313|EnsemblPlants:Bra040633.1-P};	--	GO:0019010,farnesoic acid O-methyltransferase activity; GO:0046872,metal ion binding; GO:0080027,response to herbivore; GO:0009753,response to jasmonic acid; GO:0002238,response to molecule of fungal origin; GO:0009751,response to salicylic acid; GO:0009611,response to wounding	SAM dependent carboxyl methyltransferase
BnaA02g12600D	0.47	0.32	0.31	2.56	1.05	2.85	-2.442	7.44113e-06	down	--	uncharacterized protein LOC106433029 isoform X1 [Brassica napus]	RecName: Full=Putative glutamine amidotransferase GAT1_2.1 {ECO:0000305}; EC=2.4.2.- {ECO:0000305}; AltName: Full=Class I glutamine amidotransferase {ECO:0000303|PubMed:22885937}; AltName: Full=GAT1_2 domain-containing protein 1 {ECO:0000305};	SubName: Full=BnaA02g12600D protein {ECO:0000313|EMBL:CDY12592.1};	--	GO:0016787,hydrolase activity; GO:0016740,transferase activity; GO:0006541,glutamine metabolic process; GO:2000032,regulation of secondary shoot formation	Glutamine amidotransferase class-I
BnaA02g12870D	3.71	2	3.44	13.74	15.82	18.22	-2.285	2.90091e-09	down	K14572 midasin | (RefSeq) midasin-like (A)	BnaA02g12870D [Brassica napus]	RecName: Full=Midasin {ECO:0000303|PubMed:23572950}; Short=AtMDN1 {ECO:0000303|PubMed:23572950}; AltName: Full=Dynein-related AAA-ATPase MDN1; AltName: Full=MIDAS-containing protein 1 {ECO:0000303|PubMed:23572950}; AltName: Full=Protein DWARF AND SHORT ROOT 1 {ECO:0000303|PubMed:27824150};	SubName: Full=BnaA02g12870D protein {ECO:0000313|EMBL:CDY12619.1};	AAA ATPase containing von Willebrand factor type A (vWA) domain	GO:0009941,chloroplast envelope; GO:0005730,nucleolus; GO:0005654,nucleoplasm; GO:0009506,plasmodesma; GO:0005524,ATP binding; GO:0016887,ATPase activity; GO:0009738,abscisic acid-activated signaling pathway; GO:0009553,embryo sac development; GO:0048638,regulation of developmental growth; GO:0000027,ribosomal large subunit assembly	--
BnaA02g12880D	2.18	2.53	3.09	10.38	10.37	9.02	-1.836	2.7271e-30	down	K14572 midasin | (RefSeq) midasin (A)	BnaA02g12880D [Brassica napus]	RecName: Full=Midasin {ECO:0000303|PubMed:23572950}; Short=AtMDN1 {ECO:0000303|PubMed:23572950}; AltName: Full=Dynein-related AAA-ATPase MDN1; AltName: Full=MIDAS-containing protein 1 {ECO:0000303|PubMed:23572950}; AltName: Full=Protein DWARF AND SHORT ROOT 1 {ECO:0000303|PubMed:27824150};	RecName: Full=Midasin {ECO:0000256|PIRNR:PIRNR010340};	AAA ATPase containing von Willebrand factor type A (vWA) domain	GO:0009941,chloroplast envelope; GO:0005730,nucleolus; GO:0005654,nucleoplasm; GO:0009506,plasmodesma; GO:0005524,ATP binding; GO:0016887,ATPase activity; GO:0009738,abscisic acid-activated signaling pathway; GO:0009553,embryo sac development; GO:0048638,regulation of developmental growth; GO:0000027,ribosomal large subunit assembly	Type III restriction enzyme, res subunit
BnaA02g12930D	10.07	9.71	9.2	2.26	6.37	3.96	1.292	0.00203509	up	--	BnaA02g12930D [Brassica napus]	--	SubName: Full=BnaA02g12930D protein {ECO:0000313|EMBL:CDY12625.1};	--	--	Up-frameshift suppressor 2
BnaA02g13100D	46.38	31.68	20.71	8.8	8.44	10.24	1.952	9.25881e-12	up	K17616 CTD small phosphatase-like protein 2 [EC:3.1.3.-] | (RefSeq) uncharacterized LOC100262484 (A)	BnaA02g13100D [Brassica napus]	RecName: Full=REF/SRPP-like protein At1g67360;	SubName: Full=BnaA02g13100D protein {ECO:0000313|EMBL:CDY12642.1};	--	GO:0005783,endoplasmic reticulum; GO:0005811,lipid droplet; GO:0005773,vacuole; GO:0080186,developmental vegetative growth; GO:0034389,lipid droplet organization; GO:0009555,pollen development; GO:0045927,positive regulation of growth; GO:1902584,positive regulation of response to water deprivation	Rubber elongation factor protein (REF)
BnaA02g13180D	4.08	5.07	5.77	12.78	12.28	13.39	-1.267	1.11957e-09	down	K14830 protein MAK11 | (RefSeq) p21-activated protein kinase-interacting protein 1-like (A)	BnaA02g13180D [Brassica napus]	RecName: Full=Cleavage stimulation factor subunit 50 {ECO:0000303|PubMed:12379796}; Short=AtCstF-50 {ECO:0000303|PubMed:12379796}; Short=AtCstF50 {ECO:0000303|PubMed:16282318}; AltName: Full=CF-1 50 kDa subunit {ECO:0000305}; AltName: Full=Cleavage stimulation factor 50 kDa subunit {ECO:0000305}; Short=CSTF 50 kDa subunit {ECO:0000305};	SubName: Full=BnaA02g13180D protein {ECO:0000313|EMBL:CDY12650.1};	WD40 repeat-containing protein	GO:0005634,nucleus; GO:0006397,mRNA processing	WD domain, G-beta repeat
BnaA02g13300D	10.81	8.63	5.28	3.02	1.66	2	2.001	9.76713e-07	up	--	BnaA02g13300D [Brassica napus]	RecName: Full=Thionin; Contains: RecName: Full=Thionin; Contains: RecName: Full=Acidic protein; Flags: Precursor;	SubName: Full=BnaA02g13300D protein {ECO:0000313|EMBL:CDY12662.1};	--	GO:0090729,toxin activity; GO:0006952,defense response	Plant thionin
BnaA02g13410D	9.78	14.93	8.87	27.96	26.83	32.94	-1.285	1.35609e-08	down	--	PREDICTED: histidine-rich glycoprotein-like [Brassica rapa]	--	SubName: Full=Uncharacterized protein {ECO:0000313|EnsemblPlants:Bra033973.1-P};	--	--	--
BnaA02g13460D	6.25	5.87	2.39	38.47	25.77	30.86	-2.606	9.07803e-16	down	K00588 caffeoyl-CoA O-methyltransferase [EC:2.1.1.104] | (RefSeq) putative caffeoyl-CoA O-methyltransferase At1g67980 (A)	PREDICTED: putative caffeoyl-CoA O-methyltransferase At1g67980 [Brassica rapa]	RecName: Full=Putative caffeoyl-CoA O-methyltransferase At1g67980; EC=2.1.1.104; AltName: Full=Trans-caffeoyl-CoA 3-O-methyltransferase; Short=CCoAMT; Short=CCoAOMT;	SubName: Full=Uncharacterized protein {ECO:0000313|EnsemblPlants:Bra033968.1-P};	O-methyltransferase	GO:0005829,cytosol; GO:0042409,caffeoyl-CoA O-methyltransferase activity; GO:0046872,metal ion binding; GO:0009809,lignin biosynthetic process	Methyltransferase domain
BnaA02g13750D	3.26	3.36	5.43	2.45	2	1.66	1.083	0.00778939	up	--	BnaA02g13750D [Brassica napus]	--	SubName: Full=BnaA02g13750D protein {ECO:0000313|EMBL:CDY12707.1};	--	--	Protein of unknown function (DUF1639)
BnaA02g13770D	2.7	2.18	2.51	4.77	5.9	5.23	-1.006	0.000122892	down	K14566 U3 small nucleolar RNA-associated protein 24 | (RefSeq) uncharacterized protein LOC109844566 isoform X1 (A)	BnaA02g13770D [Brassica napus]	RecName: Full=Chaperone protein dnaJ 15; Short=AtDjB15; Short=AtJ15; AltName: Full=Protein ALTERED RESPONSE TO GRAVITY; Short=AtARG1;	SubName: Full=BnaA02g13770D protein {ECO:0000313|EMBL:CDY44905.1};	Molecular chaperone (DnaJ superfamily)	GO:0005856,cytoskeleton; GO:0005789,endoplasmic reticulum membrane; GO:0000139,Golgi membrane; GO:0008092,cytoskeletal protein binding; GO:0009958,positive gravitropism	DnaJ domain
BnaA02g13790D	2.28	3.76	3.91	6.86	10.86	5.36	-1.13	0.000771414	down	K04733 interleukin-1 receptor-associated kinase 4 [EC:2.7.11.1] | (RefSeq) probable leucine-rich repeat receptor-like protein kinase At1g68400 (A)	BnaA02g13790D [Brassica napus]	RecName: Full=Probable leucine-rich repeat receptor-like protein kinase At1g68400; EC=2.7.11.1; Flags: Precursor;	SubName: Full=BnaA02g13790D protein {ECO:0000313|EMBL:CDY44903.1};	--	GO:0016021,integral component of membrane; GO:0005886,plasma membrane; GO:0005524,ATP binding; GO:0004674,protein serine/threonine kinase activity	Leucine rich repeat
BnaA02g14220D	1.66	1.09	2.01	3.88	4.17	3.11	-1.132	0.00216784	down	K12126 phytochrome-interacting factor 3 | (RefSeq) transcription factor APG-like (A)	BnaA02g14220D [Brassica napus]	RecName: Full=Transcription factor BIM2; AltName: Full=BES1-interacting Myc-like protein 2; AltName: Full=Basic helix-loop-helix protein 102; Short=AtbHLH102; Short=bHLH 102; AltName: Full=Transcription factor EN 125; AltName: Full=bHLH transcription factor bHLH102;	SubName: Full=BnaA02g14220D protein {ECO:0000313|EMBL:CDY45831.1};	--	GO:0005634,nucleus; GO:0003700,DNA-binding transcription factor activity; GO:0046983,protein dimerization activity; GO:0043565,sequence-specific DNA binding; GO:0006351,transcription, DNA-templated	Helix-loop-helix DNA-binding domain
BnaA02g14330D	0.73	1.02	0.7	2.84	2.82	3.42	-1.792	0.00162492	down	K20628 expansin | (RefSeq) expansin-A15 (A)	BnaA02g14330D [Brassica napus]	RecName: Full=Expansin-A1; Short=AtEXPA1; AltName: Full=Alpha-expansin-1; Short=At-EXP1; Short=AtEx1; AltName: Full=Ath-ExpAlpha-1.2; Flags: Precursor;	SubName: Full=BnaA02g14330D protein {ECO:0000313|EMBL:CDY44069.1};	--	GO:0005618,cell wall; GO:0005576,extracellular region; GO:0016020,membrane; GO:0009664,plant-type cell wall organization	Lytic transglycolase
BnaA02g14340D	25.45	27.5	19.86	49.65	50.51	69.14	-1.114	2.56171e-09	down	K20628 expansin | (RefSeq) expansin-A15 (A)	BnaA02g14340D [Brassica napus]	RecName: Full=Expansin-A1; Short=AtEXPA1; AltName: Full=Alpha-expansin-1; Short=At-EXP1; Short=AtEx1; AltName: Full=Ath-ExpAlpha-1.2; Flags: Precursor;	SubName: Full=BnaA02g14340D protein {ECO:0000313|EMBL:CDY44070.1};	--	GO:0005618,cell wall; GO:0005576,extracellular region; GO:0016020,membrane; GO:0009664,plant-type cell wall organization	Lytic transglycolase
BnaA02g14440D	5.76	4.55	2.93	1.12	0.51	1.26	2.303	3.50151e-09	up	--	BnaA02g14440D [Brassica napus]	--	SubName: Full=BnaA02g14440D protein {ECO:0000313|EMBL:CDY44080.1};	--	--	Protein of unknown function (DUF1666)
BnaA02g14780D	19.29	23.21	20.54	7.08	3.24	6.27	2.033	3.98983e-15	up	K17500 integrin-linked kinase-associated serine/threonine phosphatase 2C [EC:3.1.3.16] | (RefSeq) WAT1-related protein At3g18200-like (A)	PREDICTED: WAT1-related protein At1g70260 [Brassica rapa]	RecName: Full=WAT1-related protein At1g70260;	RecName: Full=WAT1-related protein {ECO:0000256|RuleBase:RU363077};	--	GO:0005783,endoplasmic reticulum; GO:0016021,integral component of membrane; GO:0005886,plasma membrane; GO:0022857,transmembrane transporter activity; GO:1900425,negative regulation of defense response to bacterium; GO:1902289,negative regulation of defense response to oomycetes; GO:1900150,regulation of defense response to fungus	EamA-like transporter family
BnaA02g14860D	4.35	3.68	5.66	1.33	1.44	2.19	1.556	5.15844e-05	up	--	PREDICTED: uncharacterized protein LOC103852649 [Brassica rapa]	--	SubName: Full=Uncharacterized protein {ECO:0000313|EnsemblPlants:Bra007913.1-P};	--	--	Protein of unknown function (DUF1645)
BnaA02g15060D	0.13	0.66	0.34	1.67	1.79	1.34	-1.985	0.00157105	down	K14831 protein MAK16 | (RefSeq) protein MAK16 homolog A (A)	protein MAK16 homolog A [Brassica napus]	--	RecName: Full=Protein MAK16 homolog {ECO:0000256|PIRNR:PIRNR003352};	RNA-binding nuclear protein (MAK16) containing a distinct C4 Zn-finger	--	Mak16 protein C-terminal region
BnaA02g15240D	0.23	0	0	0.61	1.06	1.27	-3.612	0.00539264	down	K10745 ribonuclease H2 subunit C | (RefSeq) uncharacterized protein LOC107416231 (A)	BnaC02g20370D [Brassica napus]	RecName: Full=MLP-like protein 31;	SubName: Full=BnaC02g20370D protein {ECO:0000313|EMBL:CDY09495.1};	--	GO:0006952,defense response; GO:0009607,response to biotic stimulus	Polyketide cyclase / dehydrase and lipid transport
BnaA02g15250D	7.77	8.18	6.51	1.95	3.34	6.15	1.066	0.0129612	up	K10745 ribonuclease H2 subunit C | (RefSeq) uncharacterized protein LOC107416231 (A)	MLP-like protein 31 [Brassica napus]	RecName: Full=MLP-like protein 31;	SubName: Full=Uncharacterized protein {ECO:0000313|EnsemblPlants:Bra007950.1-P};	--	GO:0006952,defense response; GO:0009607,response to biotic stimulus	Polyketide cyclase / dehydrase and lipid transport
BnaA02g15280D	14.67	9.71	11.99	1.72	4.72	0.45	2.483	4.65736e-05	up	K09509 DnaJ homolog subfamily B member 3 | (RefSeq) dnaJ homolog subfamily B member 3-like (A)	uncharacterized protein LOC106394994 [Brassica napus]	RecName: Full=Chaperone protein dnaJ 6; Short=AtDjC6; Short=AtJ6;	SubName: Full=Uncharacterized protein {ECO:0000313|EnsemblPlants:Bra007953.1-P};	Molecular chaperone (DnaJ superfamily)	GO:0005634,nucleus	DnaJ domain
BnaA02g15910D	49.12	76.92	22.09	11.89	4.33	3.71	3.004	2.98877e-05	up	--	Kunitz-type cysteine protease inhibitor [Brassica rapa]	RecName: Full=Cysteine protease inhibitor WSCP; AltName: Full=Kunitz-type cysteine protease inhibitor WSCP {ECO:0000305}; AltName: Full=Water-soluble chlorophyll protein {ECO:0000303|PubMed:26016527}; Short=AtWSCP {ECO:0000303|PubMed:26016527}; Flags: Precursor;	SubName: Full=Kunitz-type cysteine protease inhibitor {ECO:0000313|EMBL:ABL97966.1};	--	GO:0048046,apoplast; GO:0005618,cell wall; GO:0005783,endoplasmic reticulum; GO:0004869,cysteine-type endopeptidase inhibitor activity; GO:0030414,peptidase inhibitor activity; GO:0006952,defense response; GO:0010466,negative regulation of peptidase activity; GO:0010941,regulation of cell death; GO:0080092,regulation of pollen tube growth; GO:0080027,response to herbivore; GO:0009625,response to …	Trypsin and protease inhibitor
BnaA02g15990D	24.08	20.15	36.39	8.46	9.28	8.57	1.712	2.30615e-12	up	K13464 jasmonate ZIM domain-containing protein | (RefSeq) protein TIFY 11B-like (A)	protein TIFY 11B-like [Brassica napus]	RecName: Full=Protein TIFY 11B; AltName: Full=Jasmonate ZIM domain-containing protein 6;	SubName: Full=Uncharacterized protein {ECO:0000313|EnsemblPlants:Bra008033.1-P};	--	GO:0005634,nucleus; GO:0003714,transcription corepressor activity; GO:0006952,defense response; GO:1903507,negative regulation of nucleic acid-templated transcription; GO:0031347,regulation of defense response; GO:2000022,regulation of jasmonic acid mediated signaling pathway; GO:0006355,regulation of transcription, DNA-templated; GO:0009753,response to jasmonic acid; GO:0009611,response to wound…	Divergent CCT motif
BnaA02g16020D	1.71	2.27	3.94	0.35	0.71	0.54	2.395	1.07564e-08	up	K00454 lipoxygenase [EC:1.13.11.12] | (RefSeq) lipoxygenase 4, chloroplastic (A)	BnaA02g16020D [Brassica napus]	RecName: Full=Lipoxygenase 4, chloroplastic; Short=AtLOX4; EC=1.13.11.12; AltName: Full=LOX3-like protein; Flags: Precursor;	RecName: Full=Lipoxygenase {ECO:0000256|RuleBase:RU003975}; EC=1.13.11.- {ECO:0000256|RuleBase:RU003975};	--	GO:0009507,chloroplast; GO:0016165,linoleate 13S-lipoxygenase activity; GO:0046872,metal ion binding; GO:0009901,anther dehiscence; GO:0048653,anther development; GO:0034440,lipid oxidation; GO:0031408,oxylipin biosynthetic process; GO:0009555,pollen development; GO:0009617,response to bacterium; GO:0010193,response to ozone; GO:0009611,response to wounding; GO:0080086,stamen filament development	PLAT/LH2 domain
BnaA02g16100D	2.54	2.96	4.19	9.64	11.85	10.62	-1.634	6.74467e-12	down	K03257 translation initiation factor 4A | (RefSeq) eukaryotic initiation factor 4A-3-like isoform X2 (A)	eukaryotic initiation factor 4A-3-like isoform X1 [Brassica napus]	RecName: Full=Eukaryotic initiation factor 4A-3; Short=eIF-4A-3; EC=3.6.4.13; AltName: Full=ATP-dependent RNA helicase eIF4A-3; AltName: Full=DEAD-box ATP-dependent RNA helicase 23;	SubName: Full=Uncharacterized protein {ECO:0000313|EnsemblPlants:Bra008045.1-P};	Translation initiation factor 4F, helicase subunit (eIF-4A) and related helicases	GO:0005737,cytoplasm; GO:0005829,cytosol; GO:0005730,nucleolus; GO:0009505,plant-type cell wall; GO:0005774,vacuolar membrane; GO:0005524,ATP binding; GO:0004004,ATP-dependent RNA helicase activity; GO:0003743,translation initiation factor activity; GO:0010468,regulation of gene expression; GO:0010501,RNA secondary structure unwinding; GO:0006413,translational initiation	U3-containing 90S pre-ribosomal complex subunit
BnaA02g16460D	54.77	20.83	147.84	11.34	8.62	12.24	2.895	0.000137988	up	K07766 diphosphoinositol-polyphosphate diphosphatase [EC:3.6.1.52] | (RefSeq) nudix hydrolase 21, chloroplastic (A)	BnaA02g16460D [Brassica napus]	RecName: Full=Nudix hydrolase 21, chloroplastic; Short=AtNUDT21; EC=3.6.1.-; Flags: Precursor;	SubName: Full=BnaA02g16460D protein {ECO:0000313|EMBL:CDY58316.1};	Diadenosine and diphosphoinositol polyphosphate phosphohydrolase	GO:0009507,chloroplast; GO:0005737,cytoplasm; GO:0005634,nucleus; GO:0016818,hydrolase activity, acting on acid anhydrides, in phosphorus-containing anhydrides; GO:0046872,metal ion binding	NUDIX domain
BnaA02g16510D	10.48	10.8	10.72	5.88	5.31	5.43	1.047	3.6188e-07	up	--	BnaA02g16510D [Brassica napus]	--	SubName: Full=BnaA02g16510D protein {ECO:0000313|EMBL:CDY47744.1};	Predicted steroid reductase	--	Isoprenylcysteine carboxyl methyltransferase (ICMT) family
BnaA02g16520D	5.01	3.97	3.66	1.24	2.07	1.8	1.404	2.01341e-06	up	K10529 alpha-dioxygenase [EC:1.-.-.-] | (RefSeq) alpha-dioxygenase 1 (A)	BnaA02g16520D [Brassica napus]	RecName: Full=Alpha-dioxygenase 2; Short=Alpha DOX2; EC=1.14.99.-; AltName: Full=Fatty acid dioxygenase AlphaDOX2; Flags: Precursor;	SubName: Full=BnaA02g16520D protein {ECO:0000313|EMBL:CDY47743.1};	Peroxidase/oxygenase	GO:0051213,dioxygenase activity; GO:0020037,heme binding; GO:0046872,metal ion binding; GO:0004601,peroxidase activity; GO:0006631,fatty acid metabolic process; GO:0010150,leaf senescence; GO:0001676,long-chain fatty acid metabolic process; GO:0031408,oxylipin biosynthetic process; GO:0006979,response to oxidative stress	Animal haem peroxidase
BnaA02g17000D	3	2.78	6.23	2.49	1.05	1.71	1.302	0.00694208	up	K08869 aarF domain-containing kinase | (RefSeq) predicted protein (A)	PREDICTED: transcription factor MYB1R1-like [Brassica rapa]	RecName: Full=Transcription factor MYB1R1; AltName: Full=Myb-related protein R1 {ECO:0000303|PubMed:21030505}; Short=StMYB1R-1 {ECO:0000303|PubMed:21030505};	SubName: Full=Uncharacterized protein {ECO:0000313|EnsemblPlants:Bra008169.1-P};	--	GO:0005829,cytosol; GO:0005634,nucleus; GO:0003677,DNA binding; GO:0006355,regulation of transcription, DNA-templated; GO:0006351,transcription, DNA-templated	Domain of unknown function (DUF4756)
BnaA02g17260D	15.33	17.71	22.86	48.38	40.49	58.12	-1.292	7.4525e-12	down	K17500 integrin-linked kinase-associated serine/threonine phosphatase 2C [EC:3.1.3.16] | (RefSeq) WAT1-related protein At3g18200-like (A)	BnaA02g17260D [Brassica napus]	RecName: Full=Protein WALLS ARE THIN 1;	RecName: Full=WAT1-related protein {ECO:0000256|RuleBase:RU363077};	--	GO:0016021,integral component of membrane; GO:0009705,plant-type vacuole membrane; GO:0005886,plasma membrane; GO:0005774,vacuolar membrane; GO:0022857,transmembrane transporter activity; GO:0009851,auxin biosynthetic process; GO:0010315,auxin efflux; GO:0009734,auxin-activated signaling pathway; GO:0071555,cell wall organization; GO:0006952,defense response; GO:0009834,plant-type secondary cell …	EamA-like transporter family
BnaA02g17360D	1.15	1.26	1.3	3.89	6.06	5	-1.917	6.27451e-07	down	K03004 DNA-directed RNA polymerase I subunit RPA43 | (RefSeq) uncharacterized protein LOC111796686 (A)	PREDICTED: uncharacterized protein LOC103852969 [Brassica rapa]	--	SubName: Full=Uncharacterized protein {ECO:0000313|EnsemblPlants:Bra008213.1-P};	--	--	--
BnaA02g17660D	1	1.82	1.59	4.36	4	3.06	-1.272	0.000342271	down	--	BnaA02g17660D [Brassica napus]	RecName: Full=Uncharacterized protein At1g76660;	SubName: Full=BnaA02g17660D protein {ECO:0000313|EMBL:CDY45940.1};	--	GO:0005886,plasma membrane	--
BnaA02g18150D	7.87	7.85	8.84	0.25	0.75	0.73	3.898	3.94403e-18	up	K07088 uncharacterized protein | (RefSeq) uncharacterized LOC102601683 (A)	BnaA02g18150D [Brassica napus]	RecName: Full=Protein PIN-LIKES 3 {ECO:0000303|PubMed:22504182}; AltName: Full=Auxin efflux carrier-like protein 3 {ECO:0000303|PubMed:22504182};	SubName: Full=BnaA02g18150D protein {ECO:0000313|EMBL:CDY45981.1};	Predicted membrane protein	GO:0005789,endoplasmic reticulum membrane; GO:0016021,integral component of membrane; GO:0009734,auxin-activated signaling pathway; GO:0009733,response to auxin; GO:0055085,transmembrane transport	Membrane transport protein
BnaA02g18160D	20.11	13.82	10.47	4.68	8	6.19	1.331	2.19495e-05	up	K14172 light-harvesting complex II chlorophyll a/b binding protein 7 | (RefSeq) chlorophyll a-b binding protein 7, chloroplastic isoform X1 (A)	BnaA02g18160D [Brassica napus]	RecName: Full=Chlorophyll a-b binding protein 7, chloroplastic; AltName: Full=Light-harvesting chlorophyll B-binding protein 7; Short=AtLHCB7 {ECO:0000303|PubMed:24119415}; Short=Lhcb7 {ECO:0000305}; Flags: Precursor;	RecName: Full=Chlorophyll a-b binding protein, chloroplastic {ECO:0000256|RuleBase:RU363080};	--	GO:0009941,chloroplast envelope; GO:0009535,chloroplast thylakoid membrane; GO:0016021,integral component of membrane; GO:0009522,photosystem I; GO:0009523,photosystem II; GO:0010287,plastoglobule; GO:0016168,chlorophyll binding; GO:0031409,pigment binding; GO:0009768,photosynthesis, light harvesting in photosystem I; GO:0018298,protein-chromophore linkage; GO:0009637,response to blue light; GO:0…	Chlorophyll A-B binding protein
BnaA02g18200D	1.85	1.86	2.65	6.25	4.38	9.96	-1.585	1.75747e-06	down	K13946 auxin influx carrier (AUX1 LAX family) | (RefSeq) auxin transporter-like protein 3 (A)	PREDICTED: auxin transporter-like protein 3 [Brassica rapa]	RecName: Full=Auxin transporter-like protein 3; AltName: Full=AUX1-like protein 3;	SubName: Full=Uncharacterized protein {ECO:0000313|EnsemblPlants:Bo2g092800.1};	Amino acid transporters	GO:0016021,integral component of membrane; GO:0005886,plasma membrane; GO:0015171,amino acid transmembrane transporter activity; GO:0010328,auxin influx transmembrane transporter activity; GO:0015293,symporter activity; GO:0003333,amino acid transmembrane transport; GO:0009926,auxin polar transport; GO:0009734,auxin-activated signaling pathway; GO:0010311,lateral root formation; GO:0009733,respon…	Transmembrane amino acid transporter protein
BnaA02g18330D	1.4	0.91	1.23	0.04	0.26	0	3.667	0.000106852	up	K08099 chlorophyllase [EC:3.1.1.14] | (RefSeq) chlorophyllase-1 (A)	BnaA02g18330D [Brassica napus]	RecName: Full=Chlorophyllase-1; Short=AtCLH1; EC=3.1.1.14; AltName: Full=Chlorophyll-chlorophyllido hydrolase 1; Short=Chlase 1; AltName: Full=Coronatine-induced protein 1; Short=CORI1;	SubName: Full=BnaA02g18330D protein {ECO:0000313|EMBL:CDY38340.1};	--	GO:0005773,vacuole; GO:0047746,chlorophyllase activity; GO:0102293,pheophytinase b activity; GO:0015996,chlorophyll catabolic process; GO:0042742,defense response to bacterium; GO:0050832,defense response to fungus	Dienelactone hydrolase family
BnaA02g18390D	2.91	1.76	2.47	0.41	0.26	0.49	2.715	3.14429e-07	up	K00521 ferric-chelate reductase [EC:1.16.1.7] | (RefSeq) ferric reduction oxidase 7, chloroplastic-like (A)	PREDICTED: NAC domain-containing protein 2 [Brassica rapa]	RecName: Full=NAC transcription factor 32 {ECO:0000305}; AltName: Full=NAC domain-containing protein 32 {ECO:0000305}; Short=ANAC032 {ECO:0000305};	SubName: Full=NAC domain protein 14 {ECO:0000313|EMBL:ANY59734.1};	--	GO:0005634,nucleus; GO:0003677,DNA binding; GO:0003700,DNA-binding transcription factor activity; GO:0009793,embryo development ending in seed dormancy; GO:1900057,positive regulation of leaf senescence; GO:0045893,positive regulation of transcription, DNA-templated; GO:0006351,transcription, DNA-templated	Protein of unknown function (DUF3683)
BnaA02g18450D	0.5	0.45	0.7	3.36	2.46	3.33	-2.37	4.28934e-08	down	K05933 aminocyclopropanecarboxylate oxidase [EC:1.14.17.4] | (RefSeq) 1-aminocyclopropane-1-carboxylate oxidase 5 (A)	1-aminocyclopropane-1-carboxylate oxidase 5 [Brassica napus]	RecName: Full=1-aminocyclopropane-1-carboxylate oxidase 5; Short=ACC oxidase 5; Short=AtACO5; EC=1.14.17.4;	SubName: Full=BnaA02g18450D protein {ECO:0000313|EMBL:CDY38352.1};	Iron/ascorbate family oxidoreductases	GO:0009815,1-aminocyclopropane-1-carboxylate oxidase activity; GO:0031418,L-ascorbic acid binding; GO:0046872,metal ion binding; GO:0006952,defense response; GO:0009693,ethylene biosynthetic process	non-haem dioxygenase in morphine synthesis N-terminal
BnaA02g18710D	3.66	3.44	2.81	0.43	0.73	1.22	2.139	1.03872e-06	up	K01834 2,3-bisphosphoglycerate-dependent phosphoglycerate mutase [EC:5.4.2.11] | (RefSeq) uncharacterized protein LOC106422744 (A)	PREDICTED: uncharacterized protein LOC103853105 [Brassica rapa]	RecName: Full=Metal-independent phosphoserine phosphatase; Short=iPSP; EC=3.1.3.3 {ECO:0000269|PubMed:22337887}; AltName: Full=Phosphoglycerate mutase-like protein 3 {ECO:0000305};	SubName: Full=Uncharacterized protein {ECO:0000313|EnsemblPlants:Bra008342.1-P};	Phosphoglycerate mutase	GO:0005829,cytosol; GO:0016791,phosphatase activity; GO:0004647,phosphoserine phosphatase activity; GO:0070179,D-serine biosynthetic process; GO:0006564,L-serine biosynthetic process	Histidine phosphatase superfamily (branch 1)
BnaA02g18780D	42.49	32.5	28.04	15.27	21.33	13.71	1.13	4.2724e-06	up	K08242 24-methylenesterol C-methyltransferase [EC:2.1.1.143] | (RefSeq) 24-methylenesterol C-methyltransferase 2-like (A)	BnaA02g18780D [Brassica napus]	RecName: Full=Uncharacterized methyltransferase At1g78140, chloroplastic; EC=2.1.1.-; Flags: Precursor;	SubName: Full=BnaA02g18780D protein {ECO:0000313|EMBL:CDY26853.1};	--	GO:0009507,chloroplast; GO:0010287,plastoglobule; GO:0008168,methyltransferase activity	Putative S-adenosyl-L-methionine-dependent methyltransferase
BnaA02g18950D	4.15	3.96	4.11	0.78	1.55	0.76	2.087	1.30336e-07	up	K12135 zinc finger protein CONSTANS | (RefSeq) zinc finger protein CONSTANS-like (A)	BnaA02g18950D [Brassica napus]	RecName: Full=B-box zinc finger protein 22 {ECO:0000303|PubMed:19920209}; AltName: Full=Protein DOUBLE B-BOX 3 {ECO:0000303|PubMed:18540109}; AltName: Full=Protein LIGHT-REGULATED ZINC FINGER PROTEIN 1 {ECO:0000303|PubMed:18796637}; AltName: Full=Protein SALT TOLERANCE HOMOLOG 3;	SubName: Full=BnaA02g18950D protein {ECO:0000313|EMBL:CDY26870.1};	--	GO:0005634,nucleus; GO:0000989,NA; GO:0008270,zinc ion binding; GO:0006355,regulation of transcription, DNA-templated; GO:0006351,transcription, DNA-templated	Cytoplasmic polyadenylation element-binding protein ZZ domain
BnaA02g19440D	4.96	4.75	5.53	3.5	0.5	2.02	1.461	0.00542421	up	K09874 aquaporin NIP | (RefSeq) aquaporin NIP6-1 (A)	aquaporin NIP6-1 [Brassica napus]	RecName: Full=Aquaporin NIP6-1; AltName: Full=NOD26-like intrinsic protein 6-1; Short=AtNIP6;1;	SubName: Full=BnaA02g19440D protein {ECO:0000313|EMBL:CDY53224.1};	Aquaporin (major intrinsic protein family)	GO:0005887,integral component of plasma membrane; GO:0005886,plasma membrane; GO:0046715,active borate transmembrane transporter activity; GO:0015267,channel activity; GO:0015168,glycerol transmembrane transporter activity; GO:0015204,urea transmembrane transporter activity; GO:0046713,borate transport; GO:0080029,cellular response to boron-containing substance levels	Major intrinsic protein
BnaA02g19450D	5.9	6.16	6.86	11.84	14.48	15.54	-1.049	1.05116e-06	down	K02937 large subunit ribosomal protein L7e | (RefSeq) 60S ribosomal protein L7-1 (A)	BnaA02g19450D [Brassica napus]	RecName: Full=60S ribosomal protein L7-1;	SubName: Full=BnaA02g19450D protein {ECO:0000313|EMBL:CDY53223.1};	60S ribosomal protein L7	GO:0005829,cytosol; GO:0022625,cytosolic large ribosomal subunit; GO:0005730,nucleolus; GO:0003723,RNA binding; GO:0003735,structural constituent of ribosome; GO:0002181,cytoplasmic translation; GO:0000463,maturation of LSU-rRNA from tricistronic rRNA transcript (SSU-rRNA, 5.8S rRNA, LSU-rRNA)	Ribosomal L30 N-terminal domain
BnaA02g19650D	6.43	3.71	4.41	1.64	1.89	1.28	1.702	9.65415e-08	up	K00052 3-isopropylmalate dehydrogenase [EC:1.1.1.85] | (RefSeq) 3-isopropylmalate dehydrogenase 2, chloroplastic-like (A)	BnaA02g19650D [Brassica napus]	RecName: Full=3-isopropylmalate dehydrogenase 2, chloroplastic; Short=3-IPM-DH 2; Short=IMDH 2; EC=1.1.1.85; AltName: Full=Beta-IPM dehydrogenase 2; Flags: Precursor;	SubName: Full=BnaA02g19650D protein {ECO:0000313|EMBL:CDY37605.1};	3-isopropylmalate dehydrogenase	GO:0009507,chloroplast; GO:0009941,chloroplast envelope; GO:0009570,chloroplast stroma; GO:0009536,plastid; GO:0003862,3-isopropylmalate dehydrogenase activity; GO:0000287,magnesium ion binding; GO:0051287,NAD binding; GO:0009098,leucine biosynthetic process	Isocitrate/isopropylmalate dehydrogenase
BnaA02g19850D	5.5	8.13	9.64	20.63	19.54	18.11	-1.228	1.31108e-08	down	--	BnaA02g19850D [Brassica napus]	--	SubName: Full=BnaA02g19850D protein {ECO:0000313|EMBL:CDY37585.1};	Predicted hydrolase/acyltransferase (alpha/beta hydrolase superfamily)	--	Serine aminopeptidase, S33
BnaA02g19860D	3.25	3.01	3.75	7.86	9.53	7.32	-1.205	0.000373759	down	--	BnaA02g19860D [Brassica napus]	--	SubName: Full=BnaA02g19860D protein {ECO:0000313|EMBL:CDY37584.1};	Predicted hydrolase/acyltransferase (alpha/beta hydrolase superfamily)	--	Serine hydrolase
BnaA02g20020D	30.7	19.67	17.24	11.45	6.75	8.23	1.466	1.19975e-07	up	--	BnaA02g20020D [Brassica napus]	--	SubName: Full=BnaA02g20020D protein {ECO:0000313|EMBL:CDY37568.1};	--	--	Tetratricopeptide repeat
BnaA02g20030D	10.54	9.24	11.66	3.19	2.3	4.69	1.723	2.77965e-09	up	K03239 translation initiation factor eIF-2B subunit alpha | (RefSeq) methylthioribose-1-phosphate isomerase (A)	PREDICTED: protein LURP-one-related 5 [Brassica oleracea var. oleracea]	RecName: Full=Protein LURP-one-related 5;	SubName: Full=Uncharacterized protein {ECO:0000313|EnsemblPlants:Bo2g097320.1};	--	--	LURP-one-related
BnaA02g20140D	33.55	30.24	26.51	12.08	14.02	13.59	1.286	3.64752e-14	up	K05928 tocopherol O-methyltransferase [EC:2.1.1.95] | (RefSeq) tocopherol O-methyltransferase, chloroplastic (A)	tocopherol O-methyltransferase, chloroplastic [Brassica napus]	RecName: Full=Tocopherol O-methyltransferase, chloroplastic; EC=2.1.1.95; AltName: Full=Gamma-tocopherol methyltransferase; AltName: Full=Vitamin E pathway gene 4 protein; Short=AtVTE4; Flags: Precursor;	SubName: Full=BnaA02g20140D protein {ECO:0000313|EMBL:CDY37556.1}; SubName: Full=Gamma-tocopherol methyltransferase {ECO:0000313|EMBL:ACD03288.1};	SAM-dependent methyltransferases	GO:0009507,chloroplast; GO:0050342,tocopherol O-methyltransferase activity; GO:0010189,vitamin E biosynthetic process	Nicotianamine synthase protein
BnaA02g20200D	26.64	20.56	21.73	4.75	4.02	3.79	2.563	6.63855e-41	up	K07408 cytochrome P450 family 1 subfamily A polypeptide 1 [EC:1.14.14.1] | (RefSeq) cytochrome P450 89A2-like (A)	BnaA02g20200D [Brassica napus]	RecName: Full=Cytochrome P450 89A2; EC=1.14.-.-; AltName: Full=ATH 6-1; AltName: Full=CYPLXXXIX;	SubName: Full=BnaA02g20200D protein {ECO:0000313|EMBL:CDY56131.1};	Cytochrome P450 CYP2 subfamily	GO:0016021,integral component of membrane; GO:0016020,membrane; GO:0020037,heme binding; GO:0005506,iron ion binding; GO:0016709,oxidoreductase activity, acting on paired donors, with incorporation or reduction of molecular oxygen, NAD(P)H as one donor, and incorporation of one atom of oxygen; GO:0044550,secondary metabolite biosynthetic process	Cytochrome P450
BnaA02g20210D	14.36	15.62	17.9	34.87	36.47	38.28	-1.097	2.05556e-15	down	K20102 YTH domain-containing family protein | (RefSeq) uncharacterized protein LOC106390404 isoform X1 (A)	BnaA02g20210D [Brassica napus]	RecName: Full=30-kDa cleavage and polyadenylation specificity factor 30 {ECO:0000303|PubMed:18479511}; EC=3.1.21.- {ECO:0000269|PubMed:17576667}; AltName: Full=Protein OXIDATIVE STRESS TOLERANT 6 {ECO:0000303|PubMed:18545667}; AltName: Full=Zinc finger CCCH domain-containing protein 11; Short=AtC3H11;	SubName: Full=BnaA02g20210D protein {ECO:0000313|EMBL:CDY56132.1};	Uncharacterized high-glucose-regulated protein	GO:0005737,cytoplasm; GO:0005847,mRNA cleavage and polyadenylation specificity factor complex; GO:0005634,nucleus; GO:0005516,calmodulin binding; GO:0003677,DNA binding; GO:0004519,endonuclease activity; GO:0004521,endoribonuclease activity; GO:0046872,metal ion binding; GO:0003729,mRNA binding; GO:0003723,RNA binding; GO:0031124,mRNA 3'-end processing; GO:0006378,mRNA polyadenylation; GO:0009626…	Protein of unknown function (DUF3942)
BnaA02g20230D	52.98	51.05	51.11	23.24	35.64	21.49	1.039	2.2413e-06	up	K05928 tocopherol O-methyltransferase [EC:2.1.1.95] | (RefSeq) tocopherol O-methyltransferase, chloroplastic-like (A)	BnaA02g20230D [Brassica napus]	RecName: Full=Tocopherol O-methyltransferase, chloroplastic; EC=2.1.1.95; AltName: Full=Gamma-tocopherol methyltransferase; AltName: Full=Vitamin E pathway gene 4 protein; Short=AtVTE4; Flags: Precursor;	SubName: Full=BnaA02g20230D protein {ECO:0000313|EMBL:CDY56135.1};	SAM-dependent methyltransferases	GO:0009507,chloroplast; GO:0050342,tocopherol O-methyltransferase activity; GO:0010189,vitamin E biosynthetic process	O-methyltransferase domain
BnaA02g20350D	0.53	0.2	0.14	1.68	1.34	1.43	-2.235	7.92091e-05	down	K17500 integrin-linked kinase-associated serine/threonine phosphatase 2C [EC:3.1.3.16] | (RefSeq) WAT1-related protein At3g18200 isoform X1 (A)	PREDICTED: WAT1-related protein At4g01430 [Brassica rapa]	RecName: Full=WAT1-related protein At4g01430;	RecName: Full=WAT1-related protein {ECO:0000256|RuleBase:RU363077};	--	GO:0016021,integral component of membrane; GO:0005886,plasma membrane; GO:0015186,L-glutamine transmembrane transporter activity; GO:0044746,NA; GO:0048316,seed development	EamA-like transporter family
BnaA02g20470D	20.64	19.93	19.34	8.29	11.74	8.72	1.154	7.31573e-10	up	K20893 probable galacturonosyltransferase-like 1 [EC:2.4.1.-] | (RefSeq) probable galacturonosyltransferase-like 1 (A)	probable galacturonosyltransferase-like 6 [Brassica napus]	RecName: Full=Probable galacturonosyltransferase-like 6; EC=2.4.1.-; AltName: Full=Like glycosyl transferase 10;	RecName: Full=Hexosyltransferase {ECO:0000256|RuleBase:RU362027}; EC=2.4.1.- {ECO:0000256|RuleBase:RU362027};	--	GO:0005794,Golgi apparatus; GO:0000139,Golgi membrane; GO:0016021,integral component of membrane; GO:0047262,polygalacturonate 4-alpha-galacturonosyltransferase activity; GO:0016757,transferase activity, transferring glycosyl groups; GO:0071555,cell wall organization; GO:0045489,pectin biosynthetic process; GO:0000271,polysaccharide biosynthetic process	Glucosyltransferase 24
BnaA02g20640D	9.08	9.07	3.88	75.82	53.8	81.95	-3.154	4.50218e-27	down	K00799 glutathione S-transferase [EC:2.5.1.18] | (RefSeq) glutathione S-transferase F3 (A)	PREDICTED: glutathione S-transferase F3 [Brassica rapa]	RecName: Full=Glutathione S-transferase F3; Short=AtGSTF3; EC=2.5.1.18; AltName: Full=GST class-phi member 3; AltName: Full=Glutathione S-transferase 16;	SubName: Full=Uncharacterized protein {ECO:0000313|EnsemblPlants:Bo01158s040.1};	Glutathione S-transferase	GO:0005737,cytoplasm; GO:0005829,cytosol; GO:0005886,plasma membrane; GO:0004364,glutathione transferase activity; GO:0006749,glutathione metabolic process; GO:0002239,response to oomycetes; GO:0009407,toxin catabolic process	Glutathione S-transferase, C-terminal domain
BnaA02g20700D	1.91	2.94	1.32	0.22	0.19	0.57	2.732	2.69105e-06	up	K08472 mlo protein | (RefSeq) MLO-like protein 1 (A)	MLO-like protein 1 [Brassica napus]	RecName: Full=MLO-like protein 1; Short=AtMlo1; AltName: Full=MLO protein homolog 1; Short=AtMlo-H1;	RecName: Full=MLO-like protein {ECO:0000256|RuleBase:RU280816};	--	GO:0016021,integral component of membrane; GO:0005886,plasma membrane; GO:0005516,calmodulin binding; GO:0006952,defense response; GO:0009607,response to biotic stimulus	Mlo family
BnaA02g21140D	3.79	1.92	0.93	17.47	11	8.65	-2.374	5.91281e-08	down	K04733 interleukin-1 receptor-associated kinase 4 [EC:2.7.11.1] | (RefSeq) putative cysteine-rich receptor-like protein kinase 39 isoform X1 (A)	PREDICTED: putative cysteine-rich receptor-like protein kinase 39 [Brassica rapa]	RecName: Full=Putative cysteine-rich receptor-like protein kinase 39; Short=Cysteine-rich RLK39; EC=2.7.11.-; Flags: Precursor;	SubName: Full=Uncharacterized protein {ECO:0000313|EnsemblPlants:Bra018496.1-P};	--	GO:0016021,integral component of membrane; GO:0005886,plasma membrane; GO:0005524,ATP binding; GO:0004674,protein serine/threonine kinase activity; GO:0006468,protein phosphorylation	Phosphotransferase enzyme family
BnaA02g21180D	17.33	11.62	13.61	4.01	5.94	3.86	1.72	1.2425e-11	up	K04733 interleukin-1 receptor-associated kinase 4 [EC:2.7.11.1] | (RefSeq) putative cysteine-rich receptor-like protein kinase 39 isoform X1 (A)	PREDICTED: putative cysteine-rich receptor-like protein kinase 39 isoform X1 [Brassica rapa]	RecName: Full=Putative cysteine-rich receptor-like protein kinase 39; Short=Cysteine-rich RLK39; EC=2.7.11.-; Flags: Precursor;	SubName: Full=Uncharacterized protein {ECO:0000313|EnsemblPlants:Bra018493.1-P};	--	GO:0016021,integral component of membrane; GO:0005886,plasma membrane; GO:0005524,ATP binding; GO:0004674,protein serine/threonine kinase activity; GO:0006468,protein phosphorylation	Phosphotransferase enzyme family
BnaA02g21680D	158.23	148.63	127.3	71.13	80.57	74.66	1.038	5.55323e-13	up	K00432 glutathione peroxidase [EC:1.11.1.9] | (RefSeq) probable phospholipid hydroperoxide glutathione peroxidase 6, mitochondrial (A)	probable phospholipid hydroperoxide glutathione peroxidase 6, mitochondrial [Brassica napus]	RecName: Full=Probable phospholipid hydroperoxide glutathione peroxidase 6, mitochondrial; Short=AtGPX1; Short=PHGPx; EC=1.11.1.12; Flags: Precursor;	RecName: Full=Glutathione peroxidase {ECO:0000256|RuleBase:RU000499};	Glutathione peroxidase	GO:0048046,apoplast; GO:0009507,chloroplast; GO:0005829,cytosol; GO:0005739,mitochondrion; GO:0005886,plasma membrane; GO:0004602,glutathione peroxidase activity; GO:0047066,phospholipid-hydroperoxide glutathione peroxidase activity; GO:0046686,response to cadmium ion; GO:0006979,response to oxidative stress; GO:0009651,response to salt stress	Redoxin
BnaA02g21750D	6.1	17.13	15.75	4.02	0.96	2.18	2.555	6.17371e-08	up	K01365 cathepsin L [EC:3.4.22.15] | (RefSeq) probable cysteine protease RDL4 (A)	PREDICTED: probable cysteine protease RDL5 [Brassica rapa]	RecName: Full=Probable cysteine protease RDL5 {ECO:0000305}; EC=3.4.22.- {ECO:0000305}; AltName: Full=Cysteine protease 2 {ECO:0000303|PubMed:23460027}; Short=AtCP2 {ECO:0000303|PubMed:23460027}; AltName: Full=Probable cysteine proteinase At4g11320 {ECO:0000305}; AltName: Full=RD21A-like protease 5 {ECO:0000305}; Flags: Precursor;	SubName: Full=Uncharacterized protein {ECO:0000313|EnsemblPlants:Bra033148.1-P};	Cysteine proteinase Cathepsin L	GO:0005615,extracellular space; GO:0005764,lysosome; GO:0004197,cysteine-type endopeptidase activity; GO:0008233,peptidase activity; GO:0051603,proteolysis involved in cellular protein catabolic process	Peptidase C1-like family
BnaA02g22320D	82.71	60.75	62.59	28.82	49.58	26.28	1.066	6.82385e-05	up	--	photosynthetic NDH subunit of subcomplex B 5, chloroplastic [Brassica napus]	RecName: Full=Photosynthetic NDH subunit of subcomplex B 5, chloroplastic {ECO:0000303|PubMed:21785130}; Short=Protein PnsB5 {ECO:0000303|PubMed:21785130}; AltName: Full=NAD(P)H dehydrogenase 18 {ECO:0000312|EMBL:AED95005.1}; Flags: Precursor;	SubName: Full=BnaA02g22320D protein {ECO:0000313|EMBL:CDY14890.1};	--	GO:0009507,chloroplast; GO:0031969,chloroplast membrane; GO:0009535,chloroplast thylakoid membrane; GO:0016021,integral component of membrane; GO:0006979,response to oxidative stress	--
BnaA02g22360D	14.1	17.17	7.99	0.62	1.78	0.63	3.797	2.35291e-16	up	K08967 1,2-dihydroxy-3-keto-5-methylthiopentene dioxygenase [EC:1.13.11.53 1.13.11.54] | (RefSeq) 1,2-dihydroxy-3-keto-5-methylthiopentene dioxygenase 4-like (A)	BnaA02g22360D [Brassica napus]	RecName: Full=1,2-dihydroxy-3-keto-5-methylthiopentene dioxygenase 4 {ECO:0000255|HAMAP-Rule:MF_03154}; EC=1.13.11.54 {ECO:0000255|HAMAP-Rule:MF_03154}; AltName: Full=Acireductone dioxygenase (Fe(2+)-requiring) 4 {ECO:0000255|HAMAP-Rule:MF_03154}; Short=ARD 4 {ECO:0000255|HAMAP-Rule:MF_03154}; Short=Fe-ARD 4 {ECO:0000255|HAMAP-Rule:MF_03154};	RecName: Full=1,2-dihydroxy-3-keto-5-methylthiopentene dioxygenase {ECO:0000256|HAMAP-Rule:MF_03154}; EC=1.13.11.54 {ECO:0000256|HAMAP-Rule:MF_03154}; AltName: Full=Acireductone dioxygenase (Fe(2+)-requiring) {ECO:0000256|HAMAP-Rule:MF_03154}; Short=ARD {ECO:0000256|HAMAP-Rule:MF_03154}; Short=Fe-ARD {ECO:0000256|HAMAP-Rule:MF_03154};	Uncharacterized conserved protein, contains double-stranded beta-helix domain	GO:0005737,cytoplasm; GO:0005634,nucleus; GO:0010309,acireductone dioxygenase [iron(II)-requiring] activity; GO:0046872,metal ion binding; GO:0019509,L-methionine salvage from methylthioadenosine; GO:0006555,methionine metabolic process	Cupin
BnaA02g22400D	12.07	11.28	10.9	3.52	6.64	5.25	1.245	2.15517e-06	up	--	BnaA02g22400D [Brassica napus]	RecName: Full=VAN3-binding protein {ECO:0000303|PubMed:19363154}; AltName: Full=Protein FORKED 1;	SubName: Full=BnaA02g22400D protein {ECO:0000313|EMBL:CDY14898.1};	--	GO:0009734,auxin-activated signaling pathway; GO:0010305,leaf vascular tissue pattern formation; GO:0010087,phloem or xylem histogenesis; GO:0009733,response to auxin	Plant pleckstrin homology-like region
BnaA02g22480D	2.19	3.05	1.77	18.78	20.94	12.63	-2.808	9.84868e-23	down	K05941 glutathione gamma-glutamylcysteinyltransferase [EC:2.3.2.15] | (RefSeq) glutathione gamma-glutamylcysteinyltransferase 1 (A)	glutathione gamma-glutamylcysteinyltransferase 1 [Brassica napus]	RecName: Full=Glutathione gamma-glutamylcysteinyltransferase 1; EC=2.3.2.15; AltName: Full=Cadmium tolerance protein; AltName: Full=Phytochelatin synthase 1; Short=AtPCS1;	SubName: Full=BnaA02g22480D protein {ECO:0000313|EMBL:CDY14906.1};	Phytochelatin synthase	GO:0005829,cytosol; GO:0015446,ATPase-coupled arsenite transmembrane transporter activity; GO:0046870,cadmium ion binding; GO:0005507,copper ion binding; GO:0016756,glutathione gamma-glutamylcysteinyltransferase activity; GO:0015700,arsenite transport; GO:0052544,defense response by callose deposition in cell wall; GO:0042742,defense response to bacterium; GO:0042344,indole glucosinolate cataboli…	Phytochelatin synthase
BnaA02g22550D	15.93	13.17	8.35	5.63	3.66	5.09	1.49	2.70708e-07	up	K14491 two-component response regulator ARR-B family | (RefSeq) two-component response regulator ORR23 (A)	BnaA02g22550D [Brassica napus]	RecName: Full=Transcription activator GLK2; AltName: Full=GBF'S PRO-RICH REGION-INTERACTING factor 2; AltName: Full=Golden2-like protein 2; Short=AtGLK2;	SubName: Full=BnaA02g22550D protein {ECO:0000313|EMBL:CDY14913.1};	--	GO:0005634,nucleus; GO:0003677,DNA binding; GO:0003700,DNA-binding transcription factor activity; GO:0009658,chloroplast organization; GO:0009910,negative regulation of flower development; GO:1900056,negative regulation of leaf senescence; GO:0045893,positive regulation of transcription, DNA-templated; GO:0010380,regulation of chlorophyll biosynthetic process; GO:0006351,transcription, DNA-templa…	Myb-like DNA-binding domain
BnaA02g23460D	140.78	122.57	133.12	43.43	43.53	37.25	1.773	2.54976e-41	up	K00696 sucrose-phosphate synthase [EC:2.4.1.14] | (RefSeq) probable sucrose-phosphate synthase 4 (A)	BnaA02g23460D [Brassica napus]	RecName: Full=Probable sucrose-phosphate synthase 4; EC=2.4.1.14; AltName: Full=Sucrose phosphate synthase 4F; Short=AtSPS4F; AltName: Full=UDP-glucose-fructose-phosphate glucosyltransferase;	SubName: Full=BnaA02g23460D protein {ECO:0000313|EMBL:CDY41124.1};	Glycosyltransferase	GO:0005886,plasma membrane; GO:0016157,sucrose synthase activity; GO:0046524,sucrose-phosphate synthase activity; GO:0005986,sucrose biosynthetic process	Fungal protein of unknown function (DUF1752)
BnaA02g23510D	13.16	11.83	13.96	32.79	37.41	25.55	-1.202	2.62036e-08	down	--	protein ABHD11 [Brassica napus]	--	SubName: Full=Uncharacterized protein {ECO:0000313|EnsemblPlants:Bra033200.1-P};	Predicted alpha/beta hydrolase	--	Serine aminopeptidase, S33
BnaA02g23680D	6.35	3.79	9.09	1.54	0.82	4.49	1.596	0.00457542	up	K19042 E3 ubiquitin-protein ligase BOI and related proteins [EC:2.3.2.27] | (RefSeq) BOI-related E3 ubiquitin-protein ligase 1 (A)	BOI-related E3 ubiquitin-protein ligase 1 [Brassica napus]	RecName: Full=BOI-related E3 ubiquitin-protein ligase 1; EC=2.3.2.27 {ECO:0000269|PubMed:20921156}; AltName: Full=RING-type E3 ubiquitin transferase BRG1 {ECO:0000305};	SubName: Full=BnaA02g23680D protein {ECO:0000313|EMBL:CDY26402.1};	Predicted E3 ubiquitin ligase	GO:0046872,metal ion binding; GO:0004842,ubiquitin-protein transferase activity; GO:0006952,defense response; GO:0043161,proteasome-mediated ubiquitin-dependent protein catabolic process; GO:0043067,regulation of programmed cell death	Prokaryotic RING finger family 4
BnaA02g23860D	6.16	4.12	6.29	2.71	3.01	3.09	1.011	0.000115681	up	K14794 ribosomal RNA-processing protein 12 | (RefSeq) hypothetical protein (A)	BnaA02g23860D [Brassica napus]	RecName: Full=Protein NUCLEAR FUSION DEFECTIVE 4 {ECO:0000303|PubMed:16698901};	SubName: Full=BnaA02g23860D protein {ECO:0000313|EMBL:CDY26384.1};	--	GO:0016021,integral component of membrane; GO:0000741,karyogamy; GO:0010197,polar nucleus fusion; GO:0009651,response to salt stress	Nodulin-like
BnaA02g24310D	285.66	279.47	282.61	126.64	157.46	110.42	1.197	4.67492e-13	up	K15283 solute carrier family 35, member E1 | (RefSeq) triose phosphate/phosphate translocator, chloroplastic-like isoform X1 (A)	BnaA02g24310D [Brassica napus]	RecName: Full=Triose phosphate/phosphate translocator, chloroplastic; Short=cTPT; Flags: Precursor;	SubName: Full=BnaA02g24310D protein {ECO:0000313|EMBL:CDY48790.1};	Glucose-6-phosphate/phosphate and phosphoenolpyruvate/phosphate antiporter	GO:0031969,chloroplast membrane; GO:0016021,integral component of membrane; GO:0022857,transmembrane transporter activity	EamA-like transporter family
BnaA02g24560D	1.22	0.73	1.19	2.39	3.1	1.98	-1.156	0.000339568	down	K19613 leucine-rich repeat protein SHOC2 | (RefSeq) disease resistance protein TAO1-like (A)	BnaA02g24560D [Brassica napus]	RecName: Full=Disease resistance protein RPS6; AltName: Full=Resistance to Pseudomonas syringae 6;	SubName: Full=BnaA02g24560D protein {ECO:0000313|EMBL:CDY43978.1};	--	GO:0043531,ADP binding; GO:0005524,ATP binding; GO:0042742,defense response to bacterium; GO:0007165,signal transduction	AAA domain
BnaA02g24690D	54.96	36.63	40.28	14.88	14.83	11.99	1.763	2.53791e-17	up	K15109 solute carrier family 25 (mitochondrial carnitine/acylcarnitine transporter), member 20/29 | (RefSeq) mitochondrial carnitine/acylcarnitine carrier-like protein (A)	mitochondrial carnitine/acylcarnitine carrier-like protein [Brassica napus]	RecName: Full=Mitochondrial carnitine/acylcarnitine carrier-like protein; AltName: Full=Carnitine/acylcarnitine translocase-like protein; Short=CAC-like protein; AltName: Full=Protein A BOUT DE SOUFFLE;	SubName: Full=BnaA02g24690D protein {ECO:0000313|EMBL:CDY37150.1};	Mitochondrial carnitine-acylcarnitine carrier protein	GO:0009507,chloroplast; GO:0016021,integral component of membrane; GO:0005743,mitochondrial inner membrane; GO:0005739,mitochondrion; GO:0009536,plastid; GO:0000064,L-ornithine transmembrane transporter activity; GO:0000066,NA; GO:0006839,mitochondrial transport	Mitochondrial carrier protein
BnaA02g24730D	5.24	4.06	6.39	23.56	28.55	15.77	-2.021	2.96765e-11	down	K22698 protein SEY1 [EC:3.6.5.-] | (RefSeq) probable LRR receptor-like serine/threonine-protein kinase At1g56130 (A)	BnaA02g24730D [Brassica napus]	RecName: Full=Probable LRR receptor-like serine/threonine-protein kinase At1g29720; EC=2.7.11.1; Flags: Precursor;	SubName: Full=BnaA02g24730D protein {ECO:0000313|EMBL:CDY37154.1};	--	GO:0016021,integral component of membrane; GO:0005886,plasma membrane; GO:0005524,ATP binding; GO:0004674,protein serine/threonine kinase activity	Leucine Rich repeats (2 copies)
BnaA02g24740D	0.86	0.79	1.07	4.05	3.58	3.24	-1.9	5.8105e-06	down	K13416 brassinosteroid insensitive 1-associated receptor kinase 1 [EC:2.7.10.1 2.7.11.1] | (RefSeq) BRASSINOSTEROID INSENSITIVE 1-associated receptor kinase 1-like isoform X1 (A)	BnaA02g24740D [Brassica napus]	RecName: Full=Probable LRR receptor-like serine/threonine-protein kinase At1g29720; EC=2.7.11.1; Flags: Precursor;	SubName: Full=BnaA02g24740D protein {ECO:0000313|EMBL:CDY37155.1};	--	GO:0016021,integral component of membrane; GO:0005886,plasma membrane; GO:0005524,ATP binding; GO:0004674,protein serine/threonine kinase activity	Leucine rich repeat
BnaA02g24990D	0.03	0.22	0.24	2.56	1.83	3.49	-3.893	3.79522e-12	down	K06268 serine/threonine-protein phosphatase 2B regulatory subunit | (RefSeq) calcineurin B-like protein 9 isoform X1 (A)	PREDICTED: calcineurin B-like protein 9 [Brassica rapa]	RecName: Full=Calcineurin B-like protein 9;	SubName: Full=Uncharacterized protein {ECO:0000313|EnsemblPlants:Bra022104.1-P};	Ca2+/calmodulin-dependent protein phosphatase (calcineurin subunit B), EF-Hand superfamily protein	GO:0005737,cytoplasm; GO:0005886,plasma membrane; GO:0005509,calcium ion binding; GO:0009738,abscisic acid-activated signaling pathway; GO:0009860,pollen tube growth; GO:0009414,response to water deprivation	EF-hand domain
BnaA02g25070D	2.58	2.18	2.25	0.11	0.64	0.93	2.143	0.000639522	up	K04733 interleukin-1 receptor-associated kinase 4 [EC:2.7.11.1] | (RefSeq) proline-rich receptor-like protein kinase PERK3 isoform X1 (A)	vesicle-associated protein 2-1 [Brassica napus]	RecName: Full=Vesicle-associated protein 2-1; AltName: Full=Plant VAP homolog 21; Short=AtPVA21; AltName: Full=VAMP-associated protein 2-1; Contains: RecName: Full=Vesicle-associated protein 2-1, N-terminally processed;	SubName: Full=BnaA02g25070D protein {ECO:0000313|EMBL:CDY28969.1}; SubName: Full=BnaC02g33270D protein {ECO:0000313|EMBL:CDY40565.1};	VAMP-associated protein involved in inositol metabolism	GO:0005783,endoplasmic reticulum; GO:0005789,endoplasmic reticulum membrane; GO:0016021,integral component of membrane; GO:0005886,plasma membrane	MSP (Major sperm protein) domain
BnaA02g25080D	9.19	6.62	11.31	3.2	3.67	3.77	1.448	8.14554e-06	up	K21596 calmodulin-binding transcription activator | (RefSeq) calmodulin-binding transcription activator 6 isoform X1 (A)	BnaA02g25080D [Brassica napus]	RecName: Full=Calmodulin-binding transcription activator 6 {ECO:0000303|PubMed:11925432}; Short=AtCAMTA6 {ECO:0000303|PubMed:11925432}; AltName: Full=Ethylene-induced calmodulin-binding protein 5 {ECO:0000312|EMBL:AAR98748.1}; Short=EICBP5 {ECO:0000312|EMBL:AAR98748.1}; AltName: Full=Ethylene-induced calmodulin-binding protein e {ECO:0000303|PubMed:11782485}; Short=EICBP.e {ECO:0000303|PubMed:117…	SubName: Full=BnaA02g25080D protein {ECO:0000313|EMBL:CDY28968.1};	Uncharacterized conserved protein	GO:0005634,nucleus; GO:0005516,calmodulin binding; GO:0043565,sequence-specific DNA binding; GO:0001077,proximal promoter DNA-binding transcription activator activity, RNA polymerase II-specific; GO:0045944,positive regulation of transcription by RNA polymerase II; GO:0006355,regulation of transcription, DNA-templated	Rrp15p
BnaA02g25110D	12.69	15.16	16.25	4.69	2.96	2.84	2.182	1.04848e-15	up	K14517 ethylene-responsive transcription factor 2 | (RefSeq) ethylene-responsive transcription factor 2 (A)	BnaA02g25110D [Brassica napus]	RecName: Full=Ethylene-responsive transcription factor 2; Short=AtERF2; AltName: Full=Ethylene-responsive element-binding factor 2; Short=EREBP-2;	SubName: Full=BnaA02g25110D protein {ECO:0000313|EMBL:CDY28965.1};	--	GO:0005634,nucleus; GO:0003677,DNA binding; GO:0003700,DNA-binding transcription factor activity; GO:0051301,cell division; GO:0009873,ethylene-activated signaling pathway; GO:0009864,induced systemic resistance, jasmonic acid mediated signaling pathway; GO:0010087,phloem or xylem histogenesis; GO:0045893,positive regulation of transcription, DNA-templated; GO:0010200,response to chitin; GO:00063…	AP2 domain
BnaA02g25550D	0.97	0.59	0.21	0.11	0.16	0.16	2.134	0.0069956	up	K14445 solute carrier family 13 (sodium-dependent dicarboxylate transporter), member 2/3/5 | (RefSeq) tonoplast dicarboxylate transporter-like (A)	BnaA02g25550D [Brassica napus]	RecName: Full=Tonoplast dicarboxylate transporter; Short=AttDT; AltName: Full=Sodium-dicarboxylate cotransporter-like; Short=AtSDAT; AltName: Full=Vacuolar malate transporter;	SubName: Full=BnaA02g25550D protein {ECO:0000313|EMBL:CDY28921.1};	Na+/dicarboxylate, Na+/tricarboxylate and phosphate transporters	GO:0016021,integral component of membrane; GO:0005774,vacuolar membrane; GO:0005773,vacuole; GO:0015140,malate transmembrane transporter activity; GO:0015743,malate transport; GO:0051453,regulation of intracellular pH; GO:0006814,sodium ion transport	Super-infection exclusion protein B
BnaA02g25600D	41.59	24.63	34.78	11.33	9.94	11.85	1.712	1.64719e-13	up	K08065 nuclear transcription Y subunit beta | (RefSeq) nuclear transcription factor Y subunit B-2-like (A)	BnaA02g25600D [Brassica napus]	RecName: Full=Nuclear transcription factor Y subunit B-2; Short=AtNF-YB-2; AltName: Full=Transcriptional activator HAP3B;	SubName: Full=BnaA02g25600D protein {ECO:0000313|EMBL:CDY28916.1};	CCAAT-binding factor, subunit A (HAP3)	GO:0005634,nucleus; GO:0003700,DNA-binding transcription factor activity; GO:0046982,protein heterodimerization activity; GO:0043565,sequence-specific DNA binding; GO:0003712,transcription coregulator activity; GO:0048574,long-day photoperiodism, flowering; GO:0006351,transcription, DNA-templated	Centromere kinetochore component CENP-T histone fold
BnaA02g25610D	16.78	16.31	12.48	6.95	5.16	5.67	1.464	1.77801e-12	up	K22763 deubiquitinase DESI2 [EC:3.4.19.12] | (Kazusa) Lj2g3v1989220.3; - (A)	BnaA02g25610D [Brassica napus]	RecName: Full=Nudix hydrolase 2; Short=AtNUDT2; EC=3.6.1.-; AltName: Full=ADP-ribose pyrophosphatase; EC=3.6.1.13; AltName: Full=NADH pyrophosphatase; EC=3.6.1.22;	SubName: Full=BnaA02g25610D protein {ECO:0000313|EMBL:CDY28915.1};	Predicted NUDIX hydrolase FGF-2 and related proteins	GO:0047631,ADP-ribose diphosphatase activity; GO:0046872,metal ion binding; GO:0051287,NAD binding; GO:0000210,NAD+ diphosphatase activity; GO:0006979,response to oxidative stress	NUDIX domain
BnaA02g26140D	0	0.09	0	0.35	0.63	0.64	-4.043	0.000826872	down	K01580 glutamate decarboxylase [EC:4.1.1.15] | (RefSeq) glutamate decarboxylase 4 (A)	BnaA02g26140D [Brassica napus]	RecName: Full=Glutamate decarboxylase 4; Short=GAD 4; EC=4.1.1.15;	RecName: Full=Glutamate decarboxylase {ECO:0000256|RuleBase:RU361171}; EC=4.1.1.15 {ECO:0000256|RuleBase:RU361171};	Glutamate decarboxylase/sphingosine phosphate lyase	GO:0005829,cytosol; GO:0005634,nucleus; GO:0005516,calmodulin binding; GO:0004351,glutamate decarboxylase activity; GO:0030170,pyridoxal phosphate binding; GO:0006536,glutamate metabolic process	Aminotransferase class-V
BnaA02g26180D	3.06	3.91	3.84	0.79	1.09	1.85	1.617	0.000201457	up	K06236 collagen, type I, alpha | (RefSeq) hypothetical protein (A)	putative Myb family transcription factor At1g14600 [Brassica napus]	RecName: Full=Putative Myb family transcription factor At1g14600;	SubName: Full=Uncharacterized protein {ECO:0000313|EnsemblPlants:Bra026618.1-P};	--	GO:0005634,nucleus; GO:0003677,DNA binding; GO:0003700,DNA-binding transcription factor activity; GO:0006355,regulation of transcription, DNA-templated; GO:0006351,transcription, DNA-templated	Myb-like DNA-binding domain
BnaA02g26260D	2.2	2.28	2.52	5.48	5.07	5.06	-1.057	2.9474e-08	down	K20718 LRR receptor-like serine/threonine-protein kinase ERECTA [EC:2.7.11.1] | (RefSeq) ERb-1; hypothetical protein (A)	BnaA02g26260D [Brassica napus]	RecName: Full=Phytosulfokine receptor 1 {ECO:0000303|PubMed:16829587}; Short=AtPSKR1; EC=2.7.11.1 {ECO:0000269|PubMed:21504901}; EC=4.6.1.2 {ECO:0000269|PubMed:21504901}; AltName: Full=Guanylate cyclase {ECO:0000303|PubMed:21504901}; AltName: Full=Phytosulfokine LRR receptor kinase 1; AltName: Full=Protein serine-threonine kinase {ECO:0000303|PubMed:21504901}; Flags: Precursor;	SubName: Full=BnaA02g26260D protein {ECO:0000313|EMBL:CDY09384.1};	--	GO:0016021,integral component of membrane; GO:0005886,plasma membrane; GO:0005524,ATP binding; GO:0004383,guanylate cyclase activity; GO:0001653,peptide receptor activity; GO:0004672,protein kinase activity; GO:0004674,protein serine/threonine kinase activity; GO:0045087,innate immune response; GO:0031347,regulation of defense response	Phosphotransferase enzyme family
BnaA02g26390D	0	0	0	0.72	1.07	1.3	-4.909	0.00808783	down	K14488 SAUR family protein | (RefSeq) auxin-responsive protein SAUR21-like (A)	BnaA02g26390D [Brassica napus]	RecName: Full=Auxin-responsive protein SAUR20 {ECO:0000305}; AltName: Full=Protein SMALL AUXIN UP RNA 20 {ECO:0000303|PubMed:12036261};	SubName: Full=Uncharacterized protein {ECO:0000313|EnsemblPlants:Bra026599.1-P};	--	GO:0005886,plasma membrane; GO:0009734,auxin-activated signaling pathway; GO:0007275,multicellular organism development; GO:0040008,regulation of growth	Auxin responsive protein
BnaA02g26620D	0.51	1	0.39	2.98	1.58	2.42	-1.773	0.00101002	down	--	BnaA02g26620D [Brassica napus]	--	SubName: Full=BnaA02g26620D protein {ECO:0000313|EMBL:CDY09348.1};	--	--	--
BnaA02g26660D	0.37	0.18	0.18	1.32	0.56	1.5	-2.094	0.0105577	down	K01166 ribonuclease T2 [EC:3.1.27.1] | (RefSeq) ribonuclease 1 (A)	ribonuclease 1 [Brassica napus]	RecName: Full=Ribonuclease 1; EC=3.1.27.1; Flags: Precursor;	SubName: Full=BnaA02g26660D protein {ECO:0000313|EMBL:CDY09344.1};	Ribonuclease, T2 family	GO:0005618,cell wall; GO:0005576,extracellular region; GO:0005886,plasma membrane; GO:0004540,ribonuclease activity; GO:0033897,ribonuclease T2 activity; GO:0003723,RNA binding; GO:0009718,anthocyanin-containing compound biosynthetic process; GO:0016036,cellular response to phosphate starvation; GO:0009611,response to wounding	Ribonuclease T2 family
BnaA02g26670D	10.16	9.05	15.69	3.11	2.58	5.27	1.769	3.2934e-08	up	K20628 expansin | (RefSeq) expansin-A15 (A)	expansin-A15 isoform X2 [Brassica napus]	RecName: Full=Expansin-A15; Short=AtEXPA15; AltName: Full=Alpha-expansin-15; Short=At-EXP15; Short=AtEx15; AltName: Full=Ath-ExpAlpha-1.3; Flags: Precursor;	SubName: Full=Uncharacterized protein {ECO:0000313|EnsemblPlants:Bo2g136670.1};	--	GO:0005618,cell wall; GO:0005576,extracellular region; GO:0016020,membrane; GO:0009664,plant-type cell wall organization; GO:0006949,syncytium formation	Lytic transglycolase
BnaA02g26910D	13.9	16.06	15.84	51.03	64.64	34.58	-1.625	5.7243e-12	down	K20538 mitogen-activated protein kinase 8 [EC:2.7.11.24] | (RefSeq) mitogen-activated protein kinase 17 (A)	mitogen-activated protein kinase 17 [Brassica napus]	RecName: Full=Mitogen-activated protein kinase 17; Short=AtMPK17; Short=MAP kinase 17; EC=2.7.11.24;	RecName: Full=Mitogen-activated protein kinase {ECO:0000256|SAAS:SAAS00652812}; EC=2.7.11.24 {ECO:0000256|SAAS:SAAS00652812};	Mitogen-activated protein kinase	GO:0005737,cytoplasm; GO:0005634,nucleus; GO:0005524,ATP binding; GO:0004707,MAP kinase activity; GO:0004674,protein serine/threonine kinase activity; GO:1900064,positive regulation of peroxisome organization; GO:0046777,protein autophosphorylation; GO:0010468,regulation of gene expression	Haspin like kinase domain
BnaA02g26940D	25.18	32.97	29.38	72.76	58.34	74.1	-1.127	2.37874e-15	down	K13947 auxin efflux carrier family | (RefSeq) auxin efflux carrier component 4 (A)	BnaA02g26940D [Brassica napus]	RecName: Full=Auxin efflux carrier component 4 {ECO:0000303|PubMed:11893337}; Short=AtPIN4 {ECO:0000303|PubMed:11893337};	RecName: Full=Auxin efflux carrier component {ECO:0000256|RuleBase:RU362108};	--	GO:0005783,endoplasmic reticulum; GO:0016021,integral component of membrane; GO:0005886,plasma membrane; GO:0010329,auxin efflux transmembrane transporter activity; GO:0010252,auxin homeostasis; GO:0009926,auxin polar transport; GO:0009734,auxin-activated signaling pathway; GO:0048364,root development	Membrane transport protein
BnaA02g27130D	6.47	5.95	4.01	2.18	1.94	2.2	1.48	1.0271e-07	up	--	BnaA02g27130D [Brassica napus]	RecName: Full=Amino-acid permease BAT1; AltName: Full=Bidirectional amino acid transporter 1; AltName: Full=GABA permease; Short=AtGABP;	SubName: Full=BnaA02g27130D protein {ECO:0000313|EMBL:CDY40399.1};	Amino acid transporters	GO:0005887,integral component of plasma membrane; GO:0031966,mitochondrial membrane; GO:0005739,mitochondrion; GO:0015297,antiporter activity; GO:0015181,arginine transmembrane transporter activity; GO:0015185,gamma-aminobutyric acid transmembrane transporter activity; GO:0015180,L-alanine transmembrane transporter activity; GO:0005313,L-glutamate transmembrane transporter activity; GO:0015189,L-…	Amino acid permease
BnaA02g27160D	48.88	41.88	47.95	25.28	27.22	20.88	1.017	1.15718e-09	up	K03118 sec-independent protein translocase protein TatC | (RefSeq) sec-independent protein translocase protein TATC, chloroplastic-like (A)	BnaA02g27160D [Brassica napus]	RecName: Full=Sec-independent protein translocase protein TATC, chloroplastic; AltName: Full=Protein ALBINO AND PALE GREEN 2; AltName: Full=Protein TWIN-ARGININE TRANSLOCATION C; AltName: Full=Protein UNFERTILIZED EMBRYO SAC 3; Flags: Precursor;	SubName: Full=BnaA02g27160D protein {ECO:0000313|EMBL:CDY40402.1};	--	GO:0009507,chloroplast; GO:0009535,chloroplast thylakoid membrane; GO:0031361,integral component of thylakoid membrane; GO:0043235,receptor complex; GO:0033281,TAT protein transport complex; GO:0009977,proton motive force dependent protein transmembrane transporter activity; GO:0009567,double fertilization forming a zygote and endosperm; GO:0065002,intracellular protein transmembrane transport; G…	Sec-independent protein translocase protein (TatC)
BnaA02g27270D	28.1	23.44	24.61	12.27	10.27	7.76	1.434	1.84517e-11	up	K22312 hydroxyjasmonate sulfotransferase [EC:2.8.2.39] | (RefSeq) cytosolic sulfotransferase 11 (A)	BnaA02g27270D [Brassica napus]	RecName: Full=Cytosolic sulfotransferase 11; Short=AtSOT11; EC=2.8.2.-;	RecName: Full=Sulfotransferase {ECO:0000256|RuleBase:RU361155}; EC=2.8.2.- {ECO:0000256|RuleBase:RU361155};	Sulfotransferase	GO:0005737,cytoplasm; GO:0008146,sulfotransferase activity	Sulfotransferase family
BnaA02g27490D	4.38	3.3	4.69	1	0.23	1.18	2.454	1.67587e-06	up	K04733 interleukin-1 receptor-associated kinase 4 [EC:2.7.11.1] | (RefSeq) NSP-interacting kinase-like protein (A)	BnaA02g27490D [Brassica napus]	RecName: Full=Protein NSP-INTERACTING KINASE 2; EC=2.7.11.1; AltName: Full=LRR receptor-like serine/threonine-protein kinase NIK2; Flags: Precursor;	SubName: Full=BnaA02g27490D protein {ECO:0000313|EMBL:CDY46499.1};	--	GO:0016021,integral component of membrane; GO:0005886,plasma membrane; GO:0005524,ATP binding; GO:0004675,transmembrane receptor protein serine/threonine kinase activity; GO:0007166,cell surface receptor signaling pathway; GO:0006952,defense response; GO:0006468,protein phosphorylation; GO:0016032,viral process	Leucine Rich Repeat
BnaA02g27500D	11.07	11.39	7.89	3.46	3.11	4.16	1.599	9.82873e-10	up	K04733 interleukin-1 receptor-associated kinase 4 [EC:2.7.11.1] | (RefSeq) NSP-interacting kinase-like protein (A)	BnaA02g27500D [Brassica napus]	RecName: Full=Protein NSP-INTERACTING KINASE 2; EC=2.7.11.1; AltName: Full=LRR receptor-like serine/threonine-protein kinase NIK2; Flags: Precursor;	SubName: Full=BnaA02g27500D protein {ECO:0000313|EMBL:CDY46500.1};	--	GO:0016021,integral component of membrane; GO:0005886,plasma membrane; GO:0005524,ATP binding; GO:0004675,transmembrane receptor protein serine/threonine kinase activity; GO:0007166,cell surface receptor signaling pathway; GO:0006952,defense response; GO:0006468,protein phosphorylation; GO:0016032,viral process	Leucine Rich Repeat
BnaA02g27850D	16.7	16.93	17.37	8.06	7.88	5.78	1.335	1.20697e-10	up	--	BnaA02g27850D [Brassica napus]	--	SubName: Full=BnaA02g27850D protein {ECO:0000313|EMBL:CDY40995.1};	--	--	--
BnaA02g27860D	17.07	15.28	12.79	43.18	28.75	35.7	-1.147	1.07019e-09	down	K20617 cytochrome P450 family 71 subfamily A | (RefSeq) hypothetical protein (A)	PREDICTED: cytochrome P450 71B22 [Brassica rapa]	RecName: Full=Cytochrome P450 71B22; EC=1.14.-.-;	SubName: Full=Uncharacterized protein {ECO:0000313|EnsemblPlants:Bra036345.1-P};	Cytochrome P450 CYP2 subfamily	GO:0016021,integral component of membrane; GO:0016020,membrane; GO:0020037,heme binding; GO:0005506,iron ion binding; GO:0016709,oxidoreductase activity, acting on paired donors, with incorporation or reduction of molecular oxygen, NAD(P)H as one donor, and incorporation of one atom of oxygen; GO:0044550,secondary metabolite biosynthetic process	Cytochrome P450
BnaA02g27880D	16.55	14.39	10.43	7.55	4.13	7.92	1.189	1.59341e-05	up	K07418 cytochrome P450 family 2 subfamily J [EC:1.14.14.1] | (RefSeq) cytochrome P450 71B17-like (A)	BnaA02g27880D [Brassica napus]	RecName: Full=Cytochrome P450 71B3; EC=1.14.-.-;	SubName: Full=BnaA02g27880D protein {ECO:0000313|EMBL:CDY40998.1};	Cytochrome P450 CYP2 subfamily	GO:0016021,integral component of membrane; GO:0016020,membrane; GO:0020037,heme binding; GO:0005506,iron ion binding; GO:0016709,oxidoreductase activity, acting on paired donors, with incorporation or reduction of molecular oxygen, NAD(P)H as one donor, and incorporation of one atom of oxygen; GO:0044550,secondary metabolite biosynthetic process	Cytochrome P450
BnaA02g27890D	21.67	15.63	16.8	4.13	7.2	3.95	1.918	1.11683e-11	up	K07418 cytochrome P450 family 2 subfamily J [EC:1.14.14.1] | (RefSeq) cytochrome P450 71B17-like (A)	PREDICTED: cytochrome P450 71B4-like [Brassica rapa]	RecName: Full=Cytochrome P450 71B4; EC=1.14.-.-;	SubName: Full=BnaA02g27890D protein {ECO:0000313|EMBL:CDY40999.1};	Cytochrome P450 CYP2 subfamily	GO:0016021,integral component of membrane; GO:0016020,membrane; GO:0020037,heme binding; GO:0005506,iron ion binding; GO:0016709,oxidoreductase activity, acting on paired donors, with incorporation or reduction of molecular oxygen, NAD(P)H as one donor, and incorporation of one atom of oxygen; GO:0044550,secondary metabolite biosynthetic process	Cytochrome P450
BnaA02g27920D	2.38	3.05	1.56	0.79	0.27	0.35	2.441	1.73617e-06	up	K07418 cytochrome P450 family 2 subfamily J [EC:1.14.14.1] | (RefSeq) cytochrome P450 71B34-like (A)	PREDICTED: cytochrome P450 71B37-like [Brassica rapa]	RecName: Full=Cytochrome P450 71B37; EC=1.14.-.-;	SubName: Full=Uncharacterized protein {ECO:0000313|EnsemblPlants:Bra040819.1-P};	Cytochrome P450 CYP2 subfamily	GO:0016021,integral component of membrane; GO:0016020,membrane; GO:0020037,heme binding; GO:0005506,iron ion binding; GO:0016709,oxidoreductase activity, acting on paired donors, with incorporation or reduction of molecular oxygen, NAD(P)H as one donor, and incorporation of one atom of oxygen; GO:0044550,secondary metabolite biosynthetic process	Cytochrome P450
BnaA02g28050D	1.58	2.77	3.65	7.85	7.11	9.49	-1.513	2.08637e-06	down	K15430 tRNA (guanine10-N2)-methyltransferase [EC:2.1.1.214] | (RefSeq) tRNA (guanine(10)-N2)-methyltransferase homolog isoform X1 (A)	BnaA02g28050D [Brassica napus]	--	SubName: Full=BnaA02g28050D protein {ECO:0000313|EMBL:CDY48991.1};	Putative RNA methylase	--	N-6 DNA Methylase
BnaA02g28080D	0.14	0.83	0.55	3.9	1.7	2.95	-2.386	2.77269e-05	down	K19613 leucine-rich repeat protein SHOC2 | (RefSeq) predicted protein (A)	BnaA02g28080D [Brassica napus]	RecName: Full=Plant intracellular Ras-group-related LRR protein 2;	SubName: Full=BnaA02g28080D protein {ECO:0000313|EMBL:CDY48988.1};	FOG: Leucine rich repeat	--	BspA type Leucine rich repeat region (6 copies)
BnaA02g28130D	229.3	356.9	376.75	781.04	743.56	819.66	-1.186	2.40022e-11	down	K09873 aquaporin TIP | (RefSeq) aquaporin TIP1-2 (A)	PREDICTED: aquaporin TIP1-2 [Brassica rapa]	RecName: Full=Aquaporin TIP1-2; AltName: Full=Gamma-tonoplast intrinsic protein 2; Short=Gamma-TIP2; AltName: Full=Salt stress-induced tonoplast intrinsic protein; AltName: Full=Tonoplast intrinsic protein 1-2; Short=AtTIP1;2;	SubName: Full=Uncharacterized protein {ECO:0000313|EnsemblPlants:Bo00285s340.1};	Aquaporin (major intrinsic protein family)	GO:0042807,central vacuole; GO:0009507,chloroplast; GO:0043674,columella; GO:0005783,endoplasmic reticulum; GO:0005794,Golgi apparatus; GO:0005887,integral component of plasma membrane; GO:0016020,membrane; GO:0009705,plant-type vacuole membrane; GO:0005886,plasma membrane; GO:0005774,vacuolar membrane; GO:0005773,vacuole; GO:0015250,water channel activity; GO:0042742,defense response to bacteriu…	Major intrinsic protein
BnaA02g28150D	38.19	23.83	36.48	11.67	14.4	8.4	1.61	1.01305e-09	up	K05298 glyceraldehyde-3-phosphate dehydrogenase (NADP+) (phosphorylating) [EC:1.2.1.13] | (RefSeq) glyceraldehyde-3-phosphate dehydrogenase GAPA1, chloroplastic (A)	BnaA02g28150D [Brassica napus]	RecName: Full=Glyceraldehyde-3-phosphate dehydrogenase GAPA1, chloroplastic; EC=1.2.1.13; AltName: Full=NADP-dependent glyceraldehydephosphate dehydrogenase A subunit 1; Flags: Precursor;	SubName: Full=BnaA02g28150D protein {ECO:0000313|EMBL:CDY48981.1};	Glyceraldehyde 3-phosphate dehydrogenase	GO:0048046,apoplast; GO:0009507,chloroplast; GO:0009941,chloroplast envelope; GO:0031969,chloroplast membrane; GO:0009570,chloroplast stroma; GO:0009535,chloroplast thylakoid membrane; GO:0016020,membrane; GO:0010319,stromule; GO:0099080,supramolecular complex; GO:0097718,disordered domain specific binding; GO:0004365,glyceraldehyde-3-phosphate dehydrogenase (NAD+) (phosphorylating) activity; GO:…	Glyceraldehyde 3-phosphate dehydrogenase, NAD binding domain
BnaA02g28170D	2.48	5.58	2.98	8.66	9.28	6.09	-1.029	0.00484429	down	K07766 diphosphoinositol-polyphosphate diphosphatase [EC:3.6.1.52] | (RefSeq) nudix hydrolase 13, mitochondrial-like (A)	nudix hydrolase 13, mitochondrial-like [Brassica napus]	RecName: Full=Nudix hydrolase 13, mitochondrial; Short=AtNUDT13; EC=3.6.1.-; Flags: Precursor;	SubName: Full=BnaA02g28170D protein {ECO:0000313|EMBL:CDY48979.1};	Diadenosine and diphosphoinositol polyphosphate phosphohydrolase	GO:0005739,mitochondrion; GO:0005634,nucleus; GO:0034432,bis(5'-adenosyl)-pentaphosphatase activity; GO:0016787,hydrolase activity; GO:0046872,metal ion binding	NUDIX domain
BnaA02g28180D	0.59	0.82	1.8	4.06	2.11	5.52	-1.755	0.000455513	down	K04733 interleukin-1 receptor-associated kinase 4 [EC:2.7.11.1] | (RefSeq) probable receptor-like protein kinase At1g30570 isoform X1 (A)	nodulation receptor kinase [Brassica napus]	RecName: Full=Nodulation receptor kinase; EC=2.7.11.1 {ECO:0000269|PubMed:26839127}; AltName: Full=Does not make infections protein 2; AltName: Full=MtSYMRK; AltName: Full=Symbiosis receptor-like kinase; Flags: Precursor;	SubName: Full=BnaA02g28180D protein {ECO:0000313|EMBL:CDY48978.1};	Serine/threonine protein kinase	GO:0016021,integral component of membrane; GO:0005524,ATP binding; GO:0004672,protein kinase activity; GO:0004674,protein serine/threonine kinase activity; GO:0009877,nodulation; GO:0046777,protein autophosphorylation	Phosphotransferase enzyme family
BnaA02g28270D	12.39	11.5	14.67	30.23	25.19	28.17	-1.015	2.00999e-11	down	--	uncharacterized protein BNAA02G28270D [Brassica napus]	--	SubName: Full=BnaA02g28270D protein {ECO:0000313|EMBL:CDY34213.1};	Fructose-6-phosphate 2-kinase/fructose-2,6-biphosphatase	--	Histidine phosphatase superfamily (branch 1)
BnaA02g28670D	0.53	0.86	1.43	8.84	7.43	9.2	-3.074	3.19744e-24	down	K05016 chloride channel 7 | (RefSeq) chloride channel protein CLC-b-like isoform X1 (A)	BnaA02g28670D [Brassica napus]	RecName: Full=Chloride channel protein CLC-b; Short=AtCLC-b; AltName: Full=CBS domain-containing protein CBSCLC7;	SubName: Full=BnaA02g28670D protein {ECO:0000313|EMBL:CDY34173.1};	Cl- channel CLC-7 and related proteins (CLC superfamily)	GO:0034707,chloride channel complex; GO:0009705,plant-type vacuole membrane; GO:0009671,nitrate:proton symporter activity; GO:0005247,voltage-gated chloride channel activity; GO:1902476,chloride transmembrane transport; GO:0034765,regulation of ion transmembrane transport	CBS domain
BnaA02g28700D	14.89	9.12	23.39	9.22	6.15	8.67	1.083	0.00114416	up	--	uncharacterized protein At3g27210 [Brassica napus]	RecName: Full=Uncharacterized protein At3g27210;	SubName: Full=BnaA02g28700D protein {ECO:0000313|EMBL:CDY34170.1};	--	GO:0005886,plasma membrane	--
BnaA02g28850D	1.27	1.32	1.03	0.57	0.56	0.51	1.254	4.69833e-05	up	K20779 E3 ubiquitin-protein ligase RNF168 [EC:2.3.2.31] | (RefSeq) LON peptidase N-terminal domain and RING finger protein 3-like (A)	BnaA02g28850D [Brassica napus]	RecName: Full=Glycosyltransferase family 92 protein RCOM_0530710; EC=2.4.1.- {ECO:0000305};	SubName: Full=BnaA02g28850D protein {ECO:0000313|EMBL:CDY34155.1};	Predicted E3 ubiquitin ligase	GO:0016021,integral component of membrane; GO:0016757,transferase activity, transferring glycosyl groups	zinc finger of C3HC4-type, RING
BnaA02g29170D	1.38	1.64	0.4	0.14	0.51	0.34	1.88	0.0157062	up	K17500 integrin-linked kinase-associated serine/threonine phosphatase 2C [EC:3.1.3.16] | (RefSeq) WAT1-related protein At3g18200 isoform X1 (A)	WAT1-related protein At3g28100-like [Brassica napus]	RecName: Full=WAT1-related protein At3g28100;	RecName: Full=WAT1-related protein {ECO:0000256|RuleBase:RU363077};	--	GO:0016021,integral component of membrane; GO:0005886,plasma membrane; GO:0022857,transmembrane transporter activity	UAA transporter family
BnaA02g29490D	3.22	3.14	2.93	6.35	6.93	8.91	-1.157	2.11201e-06	down	K09422 transcription factor MYB, plant | (RefSeq) transcription factor MYB30 (A)	transcription factor MYB30 [Brassica napus]	RecName: Full=Transcription factor MYB30 {ECO:0000303|PubMed:10929106}; AltName: Full=Myb-related protein 30 {ECO:0000303|PubMed:10929106}; Short=AtMYB30 {ECO:0000303|PubMed:10929106};	SubName: Full=BnaA02g29490D protein {ECO:0000313|EMBL:CDY44428.1};	Transcription factor, Myb superfamily	GO:0005634,nucleus; GO:0003700,DNA-binding transcription factor activity; GO:0000981,DNA-binding transcription factor activity, RNA polymerase II-specific; GO:0043565,sequence-specific DNA binding; GO:0001135,RNA polymerase II transcription regulator recruiting activity; GO:0044212,transcription regulatory region DNA binding; GO:0030154,cell differentiation; GO:0009626,plant-type hypersensitive r…	SLIDE
BnaA02g29530D	33.91	33.4	25.23	9.26	11.12	10.42	1.686	4.30623e-16	up	--	PREDICTED: protein AIG2-like [Brassica rapa]	RecName: Full=Protein AIG2 B {ECO:0000305}; EC=2.3.2.- {ECO:0000305}; AltName: Full=Avirulence-induced gene 2 protein B {ECO:0000305}; AltName: Full=Putative gamma-glutamylcyclotransferase {ECO:0000250|UniProtKB:O75223};	SubName: Full=Uncharacterized protein {ECO:0000313|EnsemblPlants:Bra033070.1-P};	--	GO:0009507,chloroplast; GO:0005886,plasma membrane; GO:0019904,protein domain specific binding; GO:0016746,transferase activity, transferring acyl groups	Gamma-glutamyl cyclotransferase, AIG2-like
BnaA02g29640D	5.36	4.99	8.06	22.52	22.56	23.8	-1.804	1.13336e-16	down	K20628 expansin | (RefSeq) expansin-A10-like (A)	expansin-A5 [Brassica napus]	RecName: Full=Expansin-A5; Short=AtEXPA5; AltName: Full=Alpha-expansin-5; Short=At-EXP5; Short=AtEx5; AltName: Full=Ath-ExpAlpha-1.4; Flags: Precursor;	SubName: Full=BnaA02g29640D protein {ECO:0000313|EMBL:CDY44413.1};	--	GO:0005618,cell wall; GO:0005576,extracellular region; GO:0016020,membrane; GO:0009664,plant-type cell wall organization; GO:0080022,primary root development; GO:0009826,unidimensional cell growth	Lytic transglycolase
BnaA02g29720D	8.98	5.68	6.8	2.07	1.61	1.11	2.274	2.0334e-13	up	K07198 5'-AMP-activated protein kinase, catalytic alpha subunit [EC:2.7.11.11] | (RefSeq) SNF1-related protein kinase catalytic subunit alpha KIN11-like (A)	BnaA02g29720D [Brassica napus]	RecName: Full=SNF1-related protein kinase catalytic subunit alpha KIN11; Short=AKIN11; EC=2.7.11.1; AltName: Full=AKIN alpha-1; Short=AKINalpha1;	RecName: Full=Non-specific serine/threonine protein kinase {ECO:0000256|SAAS:SAAS00804148}; EC=2.7.11.1 {ECO:0000256|SAAS:SAAS00804148};	Serine/threonine protein kinase	GO:0005737,cytoplasm; GO:0005634,nucleus; GO:0005524,ATP binding; GO:0004672,protein kinase activity; GO:0004674,protein serine/threonine kinase activity; GO:0005975,carbohydrate metabolic process; GO:0006633,fatty acid biosynthetic process; GO:0035556,intracellular signal transduction; GO:0042128,nitrate assimilation; GO:0046777,protein autophosphorylation; GO:0006468,protein phosphorylation; GO…	RIO1 family
BnaA02g29770D	3.46	2.99	2.37	12.16	15.43	12.52	-2.089	3.52631e-16	down	K07735 putative transcriptional regulator | (RefSeq) uncharacterized protein LOC104822985 isoform X2 (A)	uncharacterized protein LOC106371106 isoform X1 [Brassica napus]	--	SubName: Full=BnaA02g29770D protein {ECO:0000313|EMBL:CDY44400.1};	--	--	Uncharacterized ACR, COG1678
BnaA02g30180D	0.28	0.36	1.17	3.06	2.41	4.06	-2.295	5.68339e-06	down	K19791 iron transport multicopper oxidase | (RefSeq) monocopper oxidase-like protein SKU5 isoform X1 (A)	BnaA02g30180D [Brassica napus]	RecName: Full=Monocopper oxidase-like protein SKU5; AltName: Full=Skewed roots; Flags: Precursor;	SubName: Full=BnaA02g30180D protein {ECO:0000313|EMBL:CDY48757.1};	Multicopper oxidases	GO:0031225,anchored component of membrane; GO:0046658,anchored component of plasma membrane; GO:0048046,apoplast; GO:0005618,cell wall; GO:0016020,membrane; GO:0009505,plant-type cell wall; GO:0005886,plasma membrane; GO:0009506,plasmodesma; GO:0005774,vacuolar membrane; GO:0005507,copper ion binding; GO:0016722,oxidoreductase activity, oxidizing metal ions; GO:0009932,cell tip growth	Multicopper oxidase
BnaA02g30200D	1.3	2.64	4.76	8.3	8.3	7.27	-1.362	0.00164066	down	--	uncharacterized protein At5g48480 [Brassica napus]	RecName: Full=Uncharacterized protein At5g48480;	SubName: Full=BnaA02g30200D protein {ECO:0000313|EMBL:CDY48759.1};	--	GO:0005829,cytosol	Glyoxalase-like domain
BnaA02g30220D	1.46	1.64	3.33	0.85	0.84	0.99	1.358	0.0076138	up	--	uncharacterized protein BNAA02G30220D isoform X2 [Brassica napus]	--	SubName: Full=BnaA02g30220D protein {ECO:0000313|EMBL:CDY48761.1};	--	--	--
BnaA02g30370D	4.63	4.01	5.64	2.35	1.95	1.61	1.38	8.84601e-05	up	K22651 E3 ubiquitin-protein ligase RNF4 [EC:2.3.2.27] | (RefSeq) E3 ubiquitin-protein ligase RNF4-like (A)	BnaA02g30370D [Brassica napus]	RecName: Full=Putative SWI/SNF-related matrix-associated actin-dependent regulator of chromatin subfamily A member 3-like 1; Short=SMARCA3-like protein 1; EC=3.6.4.-;	SubName: Full=BnaA02g30370D protein {ECO:0000313|EMBL:CDY51051.1};	Predicted E3 ubiquitin ligase	GO:0005634,nucleus; GO:0005524,ATP binding; GO:0004386,helicase activity; GO:0003676,nucleic acid binding; GO:0008270,zinc ion binding; GO:0016569,covalent chromatin modification; GO:0006351,transcription, DNA-templated	RING-H2 zinc finger domain
BnaA02g30470D	14.23	13.63	11.78	4.34	4.53	4.5	1.669	1.93376e-24	up	K07513 acetyl-CoA acyltransferase 1 [EC:2.3.1.16] | (RefSeq) 3-ketoacyl-CoA thiolase 5, peroxisomal isoform X1 (A)	3-ketoacyl-CoA thiolase 5, peroxisomal isoform X1 [Brassica napus]	RecName: Full=3-ketoacyl-CoA thiolase 5, peroxisomal; EC=2.3.1.16; AltName: Full=Acetyl-CoA acyltransferase 5; AltName: Full=Beta-ketothiolase 5; AltName: Full=Peroxisomal 3-oxoacyl-CoA thiolase 5; Flags: Precursor;	SubName: Full=BnaA02g30470D protein {ECO:0000313|EMBL:CDY33940.1};	3-oxoacyl CoA thiolase	GO:0005777,peroxisome; GO:0003988,acetyl-CoA C-acyltransferase activity; GO:0031408,oxylipin biosynthetic process	3-Oxoacyl-[acyl-carrier-protein (ACP)] synthase III C terminal
BnaA02g30490D	1.74	2.89	3.09	8.51	4.62	8.56	-1.386	2.07921e-05	down	K01728 pectate lyase [EC:4.2.2.2] | (RefSeq) probable pectate lyase 20 (A)	probable pectate lyase 20 [Brassica napus]	RecName: Full=Probable pectate lyase 20; EC=4.2.2.2; Flags: Precursor;	RecName: Full=Pectate lyase {ECO:0000256|RuleBase:RU361123}; EC=4.2.2.2 {ECO:0000256|RuleBase:RU361123};	--	GO:0046872,metal ion binding; GO:0030570,pectate lyase activity; GO:0045490,pectin catabolic process	Periplasmic copper-binding protein (NosD)
BnaA02g30680D	12.11	11.89	11.14	3.06	1.98	2.17	2.395	1.73141e-19	up	--	PREDICTED: proline-rich antigen homolog isoform X2 [Brassica oleracea var. oleracea]	--	SubName: Full=BnaA02g30680D protein {ECO:0000313|EMBL:CDY33919.1};	--	--	--
BnaA02g30740D	33.44	40.12	22.41	78.82	77.41	75.21	-1.17	7.5261e-09	down	K15920 xylan 1,4-beta-xylosidase [EC:3.2.1.37] | (RefSeq) beta-D-xylosidase 1-like (A)	BnaA02g30740D [Brassica napus]	RecName: Full=Beta-D-xylosidase 1; Short=AtBXL1; EC=3.2.1.-; AltName: Full=Alpha-L-arabinofuranosidase; EC=3.2.1.55; Flags: Precursor;	SubName: Full=BnaA02g30740D protein {ECO:0000313|EMBL:CDY33913.1};	--	GO:0048046,apoplast; GO:0009505,plant-type cell wall; GO:0005578,NA; GO:0046556,alpha-L-arabinofuranosidase activity; GO:0005975,carbohydrate metabolic process; GO:0010214,seed coat development	Fibronectin type III-like domain
BnaA02g30880D	0.13	0.12	0.21	1.59	0.25	1.98	-2.931	0.000297335	down	K21888 glutathione dehydrogenase/transferase [EC:1.8.5.1 2.5.1.18] | (RefSeq) glutathione S-transferase DHAR3, chloroplastic-like (A)	BnaA02g30880D [Brassica napus]	RecName: Full=Glutathione S-transferase DHAR3, chloroplastic; EC=2.5.1.18 {ECO:0000269|PubMed:12077129}; AltName: Full=Chloride intracellular channel homolog 3; Short=CLIC homolog 3; AltName: Full=Glutathione-dependent dehydroascorbate reductase 3 {ECO:0000303|PubMed:12077129}; Short=AtDHAR3 {ECO:0000303|PubMed:12077129}; Short=ChlDHAR; Short=GSH-dependent dehydroascorbate reductase 3; EC=1.8.5.1…	SubName: Full=BnaA02g30880D protein {ECO:0000313|EMBL:CDY33899.1};	Intracellular Cl- channel CLIC, contains GST domain	GO:0009507,chloroplast; GO:0009941,chloroplast envelope; GO:0009570,chloroplast stroma; GO:0045174,glutathione dehydrogenase (ascorbate) activity; GO:0004364,glutathione transferase activity; GO:0006749,glutathione metabolic process; GO:0010731,protein glutathionylation; GO:0009735,response to cytokinin	Glutathione S-transferase, N-terminal domain
BnaA02g31000D	8.23	6.82	11.49	31.47	35.16	35.03	-1.84	4.26225e-20	down	K04450 cyclic AMP-dependent transcription factor ATF-2 | (RefSeq) light-inducible protein CPRF2-like (A)	basic leucine zipper 63 [Brassica napus]	RecName: Full=Basic leucine zipper 63; Short=AtbZIP63; Short=bZIP protein 63; AltName: Full=Basic leucine zipper OPAQUE 2 homolog 3; Short=Basic leucine zipper O2 homolog 3;	SubName: Full=BnaA02g31000D protein {ECO:0000313|EMBL:CDY33887.1};	--	GO:0005634,nucleus; GO:0003677,DNA binding; GO:0003700,DNA-binding transcription factor activity; GO:0042802,identical protein binding; GO:0046982,protein heterodimerization activity; GO:0071215,cellular response to abscisic acid stimulus; GO:0071333,cellular response to glucose stimulus; GO:0006351,transcription, DNA-templated	Protein of unknown function (DUF812)
BnaA02g31040D	1.62	1.55	3.94	0.99	0.75	0.95	1.505	0.00337661	up	--	PREDICTED: GRF1-interacting factor 1-like isoform X1 [Brassica rapa]	RecName: Full=GRF1-interacting factor 1; Short=AtGIF1; AltName: Full=Protein ANGUSTIFOLIA 3; AltName: Full=Transcription coactivator GIF1;	SubName: Full=BnaA02g31040D protein {ECO:0000313|EMBL:CDY33883.1};	Calcium-responsive transcription coactivator	GO:0003713,transcription coactivator activity; GO:0009955,adaxial/abaxial pattern specification; GO:0008283,cell proliferation; GO:0048366,leaf development; GO:0006355,regulation of transcription, DNA-templated; GO:0006351,transcription, DNA-templated	SSXT protein (N-terminal region)
BnaA02g31110D	18.23	15.83	14.26	4.66	6.43	3.9	1.784	1.55907e-14	up	K08145 MFS transporter, SP family, solute carrier family 2 (facilitated glucose transporter), member 8 | (RefSeq) sugar transporter ERD6-like 18 (A)	sugar transporter ERD6-like 18 [Brassica napus]	RecName: Full=Sugar transporter ERD6-like 17; AltName: Full=Sugar-porter family protein 1;	SubName: Full=Uncharacterized protein {ECO:0000313|EnsemblPlants:Bra020592.1-P};	Predicted transporter (major facilitator superfamily)	GO:0016021,integral component of membrane; GO:0005355,glucose transmembrane transporter activity; GO:0005351,carbohydrate:proton symporter activity; GO:0046323,glucose import; GO:0035428,NA; GO:0009624,response to nematode	Major Facilitator Superfamily
BnaA02g31270D	1.17	1.19	1.35	0.62	0.54	0.68	1.117	0.0122217	up	K10532 heparan-alpha-glucosaminide N-acetyltransferase [EC:2.3.1.78] | (RefSeq) heparan-alpha-glucosaminide N-acetyltransferase (A)	PREDICTED: heparan-alpha-glucosaminide N-acetyltransferase isoform X1 [Brassica rapa]	--	SubName: Full=Uncharacterized protein {ECO:0000313|EnsemblPlants:Bra020578.1-P};	Uncharacterized conserved protein	--	Protein of unknown function (DUF1624)
BnaA02g31370D	11.59	11.04	9.6	4.04	1.82	5.36	1.632	9.57166e-07	up	K17506 protein phosphatase 1L [EC:3.1.3.16] | (RefSeq) probable protein phosphatase 2C 65 (A)	PREDICTED: probable protein phosphatase 2C 73 [Brassica rapa]	RecName: Full=Probable protein phosphatase 2C 73; Short=AtPP2C73; EC=3.1.3.16; AltName: Full=AtPPC6;7;	SubName: Full=Uncharacterized protein {ECO:0000313|EnsemblPlants:Bra020569.1-P};	Serine/threonine protein phosphatase	GO:0005886,plasma membrane; GO:0046872,metal ion binding; GO:0004722,protein serine/threonine phosphatase activity; GO:0009819,drought recovery; GO:0000226,microtubule cytoskeleton organization; GO:0045926,negative regulation of growth; GO:0006470,protein dephosphorylation	Stage II sporulation protein E (SpoIIE)
BnaA02g31550D	2.39	2.68	3.35	7.53	7.07	6.58	-1.229	7.78764e-08	down	K15264 25S rRNA (cytosine2278-C5)-methyltransferase [EC:2.1.1.311] | (RefSeq) probable 28S rRNA (cytosine-C(5))-methyltransferase (A)	PREDICTED: probable 28S rRNA (cytosine-C(5))-methyltransferase [Brassica rapa]	--	SubName: Full=Uncharacterized protein {ECO:0000313|EnsemblPlants:Bra020544.1-P};	Proliferation-associated nucleolar protein (NOL1)	--	Protein-L-isoaspartate(D-aspartate) O-methyltransferase (PCMT)
BnaA02g31590D	0.55	3.32	3.37	14.26	6.69	23.76	-2.519	0.00249063	down	K10523 speckle-type POZ protein | (RefSeq) hypothetical protein (A)	PREDICTED: uncharacterized protein LOC103854707 [Brassica rapa]	RecName: Full=Ubiquitin carboxyl-terminal hydrolase 12; EC=3.4.19.12; AltName: Full=Deubiquitinating enzyme 12; Short=AtUBP12; AltName: Full=Ubiquitin thioesterase 12; AltName: Full=Ubiquitin-specific-processing protease 12;	SubName: Full=Uncharacterized protein {ECO:0000313|EnsemblPlants:Bra020541.1-P};	Speckle-type POZ protein SPOP and related proteins with TRAF, MATH and BTB/POZ domains	GO:0005737,cytoplasm; GO:0005829,cytosol; GO:0005634,nucleus; GO:0004843,thiol-dependent ubiquitin-specific protease activity; GO:0009867,jasmonic acid mediated signaling pathway; GO:0016579,protein deubiquitination; GO:0006511,ubiquitin-dependent protein catabolic process	MATH domain
BnaA02g31600D	1.3	6.66	4.63	2.21	1.7	0.35	1.656	0.01488	up	K10523 speckle-type POZ protein | (RefSeq) uncharacterized protein LOC110645119 (A)	PREDICTED: uncharacterized protein LOC103854708 [Brassica rapa]	RecName: Full=Ubiquitin carboxyl-terminal hydrolase 12; EC=3.4.19.12; AltName: Full=Deubiquitinating enzyme 12; Short=AtUBP12; AltName: Full=Ubiquitin thioesterase 12; AltName: Full=Ubiquitin-specific-processing protease 12;	SubName: Full=Uncharacterized protein {ECO:0000313|EnsemblPlants:Bra020540.1-P};	Speckle-type POZ protein SPOP and related proteins with TRAF, MATH and BTB/POZ domains	GO:0005737,cytoplasm; GO:0005829,cytosol; GO:0005634,nucleus; GO:0004843,thiol-dependent ubiquitin-specific protease activity; GO:0009867,jasmonic acid mediated signaling pathway; GO:0016579,protein deubiquitination; GO:0006511,ubiquitin-dependent protein catabolic process	MATH domain
BnaA02g31870D	0.97	1.4	1.24	3.31	2.41	3	-1.168	0.000117973	down	K14570 RNA exonuclease 1 [EC:3.1.-.-] | (RefSeq) small RNA degrading nuclease 5-like isoform X1 (A)	small RNA degrading nuclease 5-like isoform X2 [Brassica napus]	RecName: Full=Small RNA degrading nuclease 5; EC=3.1.-.-;	SubName: Full=Uncharacterized protein {ECO:0000313|EnsemblPlants:Bra020513.1-P};	3'-5' exonuclease	GO:0005634,nucleus; GO:0004527,exonuclease activity; GO:0003676,nucleic acid binding	Exonuclease
BnaA02g31900D	150.45	106.82	93.9	62.41	52.59	65.43	1.068	3.34993e-08	up	K12472 epidermal growth factor receptor substrate 15 | (RefSeq) filaggrin-like (A)	BURP domain protein RD22-like isoform X1 [Brassica napus]	RecName: Full=BURP domain protein RD22 {ECO:0000303|PubMed:9790599}; AltName: Full=Dehydration-responsive protein RD22 {ECO:0000303|PubMed:8479424}; Flags: Precursor;	SubName: Full=Uncharacterized protein {ECO:0000313|EnsemblPlants:Bra020508.1-P};	--	GO:0005768,endosome; GO:0005794,Golgi apparatus; GO:0005802,trans-Golgi network; GO:0009651,response to salt stress	BURP domain
BnaA02g31980D	16.44	11.76	16.31	44.57	23.23	94.06	-1.741	0.00194459	down	K03097 casein kinase II subunit alpha [EC:2.7.11.1] | (RefSeq) casein kinase II subunit alpha-like isoform X2 (A)	PREDICTED: uncharacterized protein LOC103854751 [Brassica rapa]	--	SubName: Full=Uncharacterized protein {ECO:0000313|EnsemblPlants:Bra020500.1-P};	--	--	Protein of unknown function (DUF642)
BnaA02g32190D	12.06	10.7	9.28	3.98	3.24	3.53	1.68	2.21768e-18	up	K07418 cytochrome P450 family 2 subfamily J [EC:1.14.14.1] | (RefSeq) cytochrome P450 71B11-like (A)	PREDICTED: cytochrome P450 71B11-like [Brassica rapa]	RecName: Full=Cytochrome P450 71B11; EC=1.14.-.-;	SubName: Full=Uncharacterized protein {ECO:0000313|EnsemblPlants:Bra020484.1-P};	Cytochrome P450 CYP2 subfamily	GO:0016021,integral component of membrane; GO:0005886,plasma membrane; GO:0020037,heme binding; GO:0005506,iron ion binding; GO:0016709,oxidoreductase activity, acting on paired donors, with incorporation or reduction of molecular oxygen, NAD(P)H as one donor, and incorporation of one atom of oxygen; GO:0044550,secondary metabolite biosynthetic process	Cytochrome P450
BnaA02g32350D	1.83	3.96	0.69	0	0.12	0.09	5.045	1.5257e-06	up	K20728 vegetative storage protein 2 | (RefSeq) vegetative storage protein 2 (A)	PREDICTED: vegetative storage protein 2 [Brassica rapa]	RecName: Full=Vegetative storage protein 2; Flags: Precursor;	SubName: Full=Uncharacterized protein {ECO:0000313|EnsemblPlants:Bra020470.1-P};	--	GO:0022626,cytosolic ribosome; GO:0005773,vacuole; GO:0003993,acid phosphatase activity; GO:0045735,nutrient reservoir activity; GO:0002213,defense response to insect; GO:0046688,response to copper ion; GO:0009625,response to insect; GO:0009753,response to jasmonic acid; GO:0006979,response to oxidative stress; GO:0009611,response to wounding	haloacid dehalogenase-like hydrolase
BnaA02g32360D	1.59	1.71	2.42	0.55	1.31	0.85	1.167	0.0113457	up	K00001 alcohol dehydrogenase [EC:1.1.1.1] | (RefSeq) alcohol dehydrogenase-like 6 (A)	PREDICTED: alcohol dehydrogenase-like 6 [Brassica rapa]	RecName: Full=Alcohol dehydrogenase-like 6; EC=1.1.1.1 {ECO:0000250|UniProtKB:P06525};	SubName: Full=Uncharacterized protein {ECO:0000313|EnsemblPlants:Bra020469.1-P};	Alcohol dehydrogenase, class III	GO:0005737,cytoplasm; GO:0004022,alcohol dehydrogenase (NAD) activity; GO:0008270,zinc ion binding	D-isomer specific 2-hydroxyacid dehydrogenase, NAD binding domain
BnaA02g32400D	2.23	3.49	3.15	2.05	1.7	0.65	1.112	0.0103535	up	K04733 interleukin-1 receptor-associated kinase 4 [EC:2.7.11.1] | (RefSeq) LEAF RUST 10 DISEASE-RESISTANCE LOCUS RECEPTOR-LIKE PROTEIN KINASE-like 2.4 (A)	PREDICTED: pathogenesis-related protein 5-like [Brassica rapa]	RecName: Full=Thaumatin-like protein 1 {ECO:0000303|PubMed:15988566}; Short=AtTLP1 {ECO:0000303|PubMed:15988566}; Flags: Precursor;	SubName: Full=Uncharacterized protein {ECO:0000313|EnsemblPlants:Bra020465.1-P};	--	GO:0009682,induced systemic resistance; GO:0009617,response to bacterium; GO:0009723,response to ethylene	Thaumatin family
BnaA02g32550D	12.29	14.58	14.65	6.02	9.64	3.17	1.225	0.00050376	up	K12130 pseudo-response regulator 5 | (RefSeq) two-component response regulator-like APRR5 (A)	PREDICTED: two-component response regulator-like APRR5 [Brassica rapa]	RecName: Full=Two-component response regulator-like APRR5; AltName: Full=Pseudo-response regulator 5;	SubName: Full=Uncharacterized protein {ECO:0000313|EnsemblPlants:Bra029407.1-P};	GATA-4/5/6 transcription factors	GO:0005634,nucleus; GO:0000160,phosphorelay signal transduction system; GO:0006355,regulation of transcription, DNA-templated; GO:0048511,rhythmic process; GO:0006351,transcription, DNA-templated	Divergent CCT motif
BnaA02g32780D	8.69	10.28	11.77	27.08	24.46	32.16	-1.345	4.56253e-12	down	K02949 small subunit ribosomal protein S11e | (RefSeq) 40S ribosomal protein S11-3 (A)	PREDICTED: 40S ribosomal protein S11-3 [Brassica rapa]	RecName: Full=40S ribosomal protein S11-3;	SubName: Full=Uncharacterized protein {ECO:0000313|EnsemblPlants:Bra029381.1-P};	40S ribosomal protein S11	GO:0022627,cytosolic small ribosomal subunit; GO:0016020,membrane; GO:0019843,rRNA binding; GO:0003735,structural constituent of ribosome; GO:0006412,translation	Ribosomal protein S17
BnaA02g32900D	1.48	0.63	0.34	2.66	3.27	2.59	-1.696	0.00506565	down	K03868 RING-box protein 1 [EC:2.3.2.32] | (RefSeq) uncharacterized LOC100792815 (A)	PREDICTED: putative GEM-like protein 8 [Brassica rapa]	RecName: Full=Putative GEM-like protein 8;	SubName: Full=Uncharacterized protein {ECO:0000313|EnsemblPlants:Bra029370.1-P};	--	--	GRAM domain
BnaA02g32920D	1.26	0.79	0.64	3.03	4.07	3.7	-1.91	4.66421e-05	down	K03868 RING-box protein 1 [EC:2.3.2.32] | (RefSeq) uncharacterized LOC100792815 (A)	PREDICTED: putative GEM-like protein 8 [Brassica rapa]	RecName: Full=Putative GEM-like protein 8;	SubName: Full=BnaA02g32920D protein {ECO:0000313|EMBL:CDY46954.1};	--	--	GRAM domain
BnaA02g32960D	25.21	31.19	29.5	72.36	97.59	70.94	-1.396	1.46442e-14	down	K16297 serine carboxypeptidase-like clade II [EC:3.4.16.-] | (RefSeq) serine carboxypeptidase-like 34 isoform X1 (A)	BnaA02g32960D [Brassica napus]	RecName: Full=Serine carboxypeptidase-like 34; EC=3.4.16.-; Flags: Precursor;	RecName: Full=Carboxypeptidase {ECO:0000256|RuleBase:RU361156}; EC=3.4.16.- {ECO:0000256|RuleBase:RU361156};	Serine carboxypeptidases (lysosomal cathepsin A)	GO:0005576,extracellular region; GO:0009505,plant-type cell wall; GO:0005773,vacuole; GO:0004185,serine-type carboxypeptidase activity; GO:0051603,proteolysis involved in cellular protein catabolic process	Serine carboxypeptidase
BnaA02g33160D	2.52	1.66	1.54	1.03	0.49	0.78	1.424	0.00333748	up	K09555 BCL2-associated athanogene 1 | (RefSeq) uncharacterized LOC100800041 (A)	BnaA02g33140D [Brassica napus]	RecName: Full=BAG family molecular chaperone regulator 2; AltName: Full=Bcl-2-associated athanogene 2;	SubName: Full=BnaA02g33140D protein {ECO:0000313|EMBL:CDY30692.1}; SubName: Full=BnaA02g33160D protein {ECO:0000313|EMBL:CDY30694.1};	BCL2-associated athanogene-like proteins and related BAG family chaperone regulators	GO:0051087,chaperone binding	Nuclear pore localisation protein NPL4
BnaA02g33190D	56.42	57.41	44.64	19.19	22.86	22.8	1.388	2.75022e-16	up	--	PREDICTED: uncharacterized protein LOC103854979 [Brassica rapa]	--	SubName: Full=Uncharacterized protein {ECO:0000313|EnsemblPlants:Bra029285.1-P};	--	--	--
BnaA02g33450D	0.43	0.43	3.19	0.16	0.08	0.29	3.023	0.00133359	up	--	BnaA02g33450D [Brassica napus]	RecName: Full=Probable inactive poly [ADP-ribose] polymerase SRO5; AltName: Full=Protein SIMILAR TO RCD ONE 5;	SubName: Full=BnaA02g33450D protein {ECO:0000313|EMBL:CDY30723.1};	--	GO:0005739,mitochondrion; GO:0016363,nuclear matrix; GO:0003950,NAD+ ADP-ribosyltransferase activity; GO:0007275,multicellular organism development; GO:0072593,reactive oxygen species metabolic process; GO:0009651,response to salt stress	Poly(ADP-ribose) polymerase catalytic domain
BnaA02g33530D	13.93	21.84	8.97	37	26.69	45.25	-1.176	6.46487e-05	down	K14638 solute carrier family 15 (peptide/histidine transporter), member 3/4 | (RefSeq) protein NRT1/ PTR FAMILY 2.11-like isoform X1 (A)	BnaA02g33530D [Brassica napus]	RecName: Full=Protein NRT1/ PTR FAMILY 2.11; Short=AtNPF2.11; AltName: Full=Nitrate transporter 1.10; AltName: Full=Protein GLUCOSINOLATE TRANSPORTER-2;	SubName: Full=BnaA02g33530D protein {ECO:0000313|EMBL:CDY30731.1};	H+/oligopeptide symporter	GO:0016021,integral component of membrane; GO:0005886,plasma membrane; GO:0009506,plasmodesma; GO:0090448,glucosinolate:proton symporter activity; GO:1901349,glucosinolate transport; GO:0090449,phloem glucosinolate loading; GO:0080167,response to karrikin	Major Facilitator Superfamily
BnaA02g33780D	6.61	5.16	7.09	1.57	1.16	1.1	2.411	1.48823e-21	up	K05278 flavonol synthase [EC:1.14.11.23] | (RefSeq) flavonol synthase 3-like (A)	BnaA02g33780D [Brassica napus]	RecName: Full=Flavonol synthase 3; EC=1.14.11.23;	SubName: Full=BnaA02g33780D protein {ECO:0000313|EMBL:CDY31363.1};	Iron/ascorbate family oxidoreductases	GO:0045431,flavonol synthase activity; GO:0046872,metal ion binding; GO:0009813,flavonoid biosynthetic process; GO:0009416,response to light stimulus	2OG-Fe(II) oxygenase superfamily
BnaA02g33900D	26.37	19.05	19.99	4.86	4.09	5.77	2.253	2.58451e-26	up	K15407 queuine tRNA-ribosyltransferase subunit QTRTD1 [EC:2.4.2.29] | (RefSeq) hypothetical protein (A)	BnaA02g33900D [Brassica napus]	--	SubName: Full=BnaA02g33900D protein {ECO:0000313|EMBL:CDY31351.1};	Protein involved in mRNA turnover and stability	--	RING-variant domain
BnaA02g33920D	7.93	11.17	5.26	70.86	65.31	41.85	-2.774	4.05066e-23	down	K12309 beta-galactosidase [EC:3.2.1.23] | (RefSeq) AT3g52840/F8J2_10 (A)	BnaA02g33920D [Brassica napus]	RecName: Full=Beta-galactosidase 6; Short=Lactase 6; EC=3.2.1.23; Flags: Precursor;	RecName: Full=Beta-galactosidase {ECO:0000256|RuleBase:RU000675}; EC=3.2.1.23 {ECO:0000256|RuleBase:RU000675};	Beta-galactosidase	GO:0048046,apoplast; GO:0005618,cell wall; GO:0005773,vacuole; GO:0004565,beta-galactosidase activity; GO:0005975,carbohydrate metabolic process; GO:0048354,mucilage biosynthetic process involved in seed coat development; GO:0009827,plant-type cell wall modification	Beta-galactosidase jelly roll domain
BnaA02g33930D	0.95	0.93	1.04	10.43	5.72	18.8	-3.466	1.4582e-18	down	K14209 solute carrier family 36 (proton-coupled amino acid transporter) | (RefSeq) probable amino acid permease 7 (A)	BnaA02g33930D [Brassica napus]	RecName: Full=Amino acid permease 4; AltName: Full=Amino acid transporter AAP4;	SubName: Full=BnaA02g33930D protein {ECO:0000313|EMBL:CDY31348.1};	Amino acid transporters	GO:0016021,integral component of membrane; GO:0005886,plasma membrane; GO:0015172,acidic amino acid transmembrane transporter activity; GO:0015175,neutral amino acid transmembrane transporter activity; GO:0015399,primary active transmembrane transporter activity; GO:0015293,symporter activity; GO:0006865,amino acid transport	Transmembrane amino acid transporter protein
BnaA02g33970D	2.7	2.88	2.2	1.35	1.26	0.87	1.268	6.09437e-05	up	K04733 interleukin-1 receptor-associated kinase 4 [EC:2.7.11.1] | (RefSeq) probable receptor-like serine/threonine-protein kinase At5g57670 (A)	BnaA02g33970D [Brassica napus]	RecName: Full=Proline-rich receptor-like protein kinase PERK13; EC=2.7.11.1; AltName: Full=Proline-rich extensin-like receptor kinase 13; Short=AtPERK13; AltName: Full=Protein ROOT HAIR SPECIFIC 10;	SubName: Full=BnaA02g33970D protein {ECO:0000313|EMBL:CDY31344.1};	--	GO:0016021,integral component of membrane; GO:0005886,plasma membrane; GO:0005524,ATP binding; GO:0019901,protein kinase binding; GO:0004675,transmembrane receptor protein serine/threonine kinase activity; GO:0007166,cell surface receptor signaling pathway; GO:0006468,protein phosphorylation	Universal stress protein family
BnaA02g34090D	22.9	18.06	21.4	4.25	4.63	4.53	2.317	1.65875e-34	up	--	BnaA02g34090D [Brassica napus]	--	SubName: Full=BnaA02g34090D protein {ECO:0000313|EMBL:CDY31332.1};	--	--	--
BnaA02g34110D	8.65	9.56	6.25	3.38	3.42	6.07	1.028	0.000640495	up	K22684 metacaspase-1 [EC:3.4.22.-] | (RefSeq) metacaspase-3-like (A)	BnaA02g34110D [Brassica napus]	RecName: Full=Metacaspase-3; Short=AtMC3; EC=3.4.22.-; AltName: Full=Metacaspase 1a; Short=AtMCP1a;	SubName: Full=BnaA02g34110D protein {ECO:0000313|EMBL:CDY31330.1};	Metacaspase involved in regulation of apoptosis	GO:0008234,cysteine-type peptidase activity	LSD1 zinc finger
BnaA02g34130D	4.63	3.45	3.62	1.53	1.73	1.69	1.343	1.44865e-06	up	K03319 divalent anion:Na+ symporter, DASS family | (Kazusa) Lj6g3v2204740.1; - (A)	BnaA02g34130D [Brassica napus]	RecName: Full=Dicarboxylate transporter 2.2, chloroplastic; AltName: Full=AtpDCT2; Flags: Precursor;	SubName: Full=BnaA02g34130D protein {ECO:0000313|EMBL:CDY31328.1};	--	GO:0009706,chloroplast inner membrane; GO:0016021,integral component of membrane; GO:0009536,plastid; GO:0005215,transporter activity; GO:0006814,sodium ion transport; GO:0055085,transmembrane transport	Citrate transporter
BnaA02g34200D	0.86	0.48	0.81	2.84	4.26	9.84	-2.876	3.07549e-10	down	K00025 malate dehydrogenase [EC:1.1.1.37] | (RefSeq) malate dehydrogenase, cytoplasmic-like (A)	BnaA02g34200D [Brassica napus]	RecName: Full=Oligopeptide transporter 4; Short=AtOPT4;	SubName: Full=BnaA02g34200D protein {ECO:0000313|EMBL:CDY31321.1};	Sexual differentiation process protein ISP4	GO:0005887,integral component of plasma membrane; GO:0016020,membrane; GO:0035673,oligopeptide transmembrane transporter activity; GO:0015031,protein transport; GO:0080167,response to karrikin	OPT oligopeptide transporter protein
BnaA02g34210D	4.96	3.1	1.77	1.71	1.18	1.07	1.427	0.00744661	up	--	BnaA02g34210D [Brassica napus]	--	SubName: Full=BnaA02g34210D protein {ECO:0000313|EMBL:CDY31320.1};	--	--	--
BnaA02g34260D	10.58	9.23	10.72	1.3	0.77	0.31	3.801	2.66182e-23	up	--	BnaA02g34260D [Brassica napus]	RecName: Full=Probable WRKY transcription factor 19; AltName: Full=WRKY DNA-binding protein 19;	SubName: Full=BnaA02g34260D protein {ECO:0000313|EMBL:CDY31315.1};	--	GO:0009941,chloroplast envelope; GO:0005634,nucleus; GO:0043531,ADP binding; GO:0005524,ATP binding; GO:0003700,DNA-binding transcription factor activity; GO:0004674,protein serine/threonine kinase activity; GO:0043565,sequence-specific DNA binding; GO:0006952,defense response; GO:0006351,transcription, DNA-templated	--
BnaA02g34280D	9.91	14.49	15.21	29.5	31.76	33.6	-1.164	5.64028e-11	down	K15920 xylan 1,4-beta-xylosidase [EC:3.2.1.37] | (RefSeq) beta-D-xylosidase 4-like (A)	BnaA02g34280D [Brassica napus]	RecName: Full=Beta-D-xylosidase 4; Short=AtBXL4; EC=3.2.1.37; Flags: Precursor;	SubName: Full=BnaA02g34280D protein {ECO:0000313|EMBL:CDY31313.1};	--	GO:0048046,apoplast; GO:0005618,cell wall; GO:0009044,xylan 1,4-beta-xylosidase activity; GO:0009627,systemic acquired resistance; GO:0045493,xylan catabolic process	Fibronectin type III-like domain
BnaA02g34310D	4.7	4.53	4.83	11.47	11.65	13.24	-1.272	1.39996e-09	down	--	mediator-associated protein 2 [Brassica napus]	RecName: Full=Mediator-associated protein 2;	SubName: Full=BnaA02g34310D protein {ECO:0000313|EMBL:CDY31310.1};	--	GO:0016592,mediator complex; GO:0005730,nucleolus	--
BnaA02g34370D	0.2	0.52	0.12	1.9	0.82	0.98	-2.028	0.0049867	down	K09286 EREBP-like factor | (RefSeq) hypothetical protein (A)	BnaA02g34370D [Brassica napus]	RecName: Full=Ethylene-responsive transcription factor ABR1; AltName: Full=Protein ABA REPRESSOR 1;	SubName: Full=BnaA02g34370D protein {ECO:0000313|EMBL:CDY31304.1};	--	GO:0005634,nucleus; GO:0003677,DNA binding; GO:0003700,DNA-binding transcription factor activity; GO:0009738,abscisic acid-activated signaling pathway; GO:0050832,defense response to fungus; GO:0009873,ethylene-activated signaling pathway; GO:0009788,negative regulation of abscisic acid-activated signaling pathway; GO:0009737,response to abscisic acid; GO:0009749,response to glucose; GO:0006970,r…	AP2 domain
BnaA02g34380D	9.65	8.25	5.38	23.8	18.37	24.04	-1.403	8.0844e-08	down	--	PREDICTED: root meristem growth factor 9-like [Brassica rapa]	RecName: Full=Root meristem growth factor 9; Short=AtRGF9; Flags: Precursor;	SubName: Full=Uncharacterized protein {ECO:0000313|EnsemblPlants:Bra031902.1-P};	--	GO:0005615,extracellular space; GO:0008083,growth factor activity; GO:0030154,cell differentiation; GO:0048527,lateral root development; GO:0009958,positive gravitropism; GO:0008284,positive regulation of cell proliferation; GO:2000012,regulation of auxin polar transport; GO:0032880,regulation of protein localization; GO:0022622,root system development	--
BnaA02g34420D	232.56	186.1	162.97	53.93	66.53	51.78	1.853	1.26681e-23	up	K06185 ATP-binding cassette, subfamily F, member 2 | (RefSeq) FAP151; flagellar associated protein (A)	BnaA02g34420D [Brassica napus]	RecName: Full=ABC transporter F family member 5; Short=ABC transporter ABCF.5; Short=AtABCF5; AltName: Full=GCN20-type ATP-binding cassette protein GCN5;	SubName: Full=BnaA02g34420D protein {ECO:0000313|EMBL:CDY31299.1};	Predicted transporter (ABC superfamily)	GO:0005524,ATP binding; GO:0016887,ATPase activity; GO:0005215,transporter activity; GO:0009624,response to nematode	Methylmalonyl Co-A mutase-associated GTPase MeaB
BnaA02g34430D	33.8	33.2	29.89	11.57	14.28	12.94	1.419	1.40109e-14	up	K12833 pre-mRNA branch site protein p14 | (RefSeq) RNA-binding protein BRN2-like isoform X1 (A)	uncharacterized protein BNAA02G34430D [Brassica napus]	--	SubName: Full=BnaA02g34430D protein {ECO:0000313|EMBL:CDY31298.1};	--	--	Cleavage site for pathogenic type III effector avirulence factor Avr
BnaA02g34610D	42.02	35.51	34.66	7.69	6.77	5.83	2.574	1.15481e-36	up	K04420 mitogen-activated protein kinase kinase kinase 2 [EC:2.7.11.25] | (RefSeq) mitogen-activated protein kinase kinase kinase YODA-like isoform X1 (A)	BnaA02g34610D [Brassica napus]	RecName: Full=Mitogen-activated protein kinase kinase kinase 5 {ECO:0000303|PubMed:27679653}; EC=2.7.11.25 {ECO:0000269|PubMed:27679653}; AltName: Full=MAP3K gamma protein kinase {ECO:0000303|PubMed:10095117}; Short=AtMAP3Kgamma {ECO:0000303|PubMed:10095117};	SubName: Full=BnaA02g34610D protein {ECO:0000313|EMBL:CDY52152.1};	MEKK and related serine/threonine protein kinases	GO:0005829,cytosol; GO:0005886,plasma membrane; GO:0005524,ATP binding; GO:0004709,MAP kinase kinase kinase activity; GO:0004674,protein serine/threonine kinase activity; GO:0000187,activation of MAPK activity; GO:0032147,activation of protein kinase activity; GO:0071323,cellular response to chitin; GO:0006952,defense response; GO:0046777,protein autophosphorylation; GO:2000071,regulation of defe…	Kinase-like
BnaA02g34940D	2.67	3.01	4.16	20.42	23.33	23.79	-2.683	3.21074e-41	down	--	BnaA02g34940D [Brassica napus]	RecName: Full=K(+) efflux antiporter 6 {ECO:0000303|PubMed:11500563}; Short=AtKEA6 {ECO:0000303|PubMed:11500563}; Flags: Precursor;	SubName: Full=BnaA02g34940D protein {ECO:0000313|EMBL:CDY61437.1};	Predicted K+/H+-antiporter	GO:0016021,integral component of membrane; GO:0016020,membrane; GO:0022890,inorganic cation transmembrane transporter activity; GO:0015299,solute:proton antiporter activity; GO:0006813,potassium ion transport	Sodium/hydrogen exchanger family
BnaA02g34950D	30.77	24.42	22.45	4.24	3.65	6.62	2.522	2.69885e-25	up	K18266 protein NDRG1 | (RefSeq) pollen-specific protein SF21-like (A)	PREDICTED: pollen-specific protein SF21-like [Brassica rapa]	RecName: Full=Protein NDL2 {ECO:0000305}; AltName: Full=Protein N-MYC DOWNREGULATED-LIKE 2 {ECO:0000303|PubMed:19948787};	SubName: Full=Uncharacterized protein {ECO:0000313|EnsemblPlants:Bra023343.1-P};	Differentiation-related gene 1 protein (NDR1 protein), related proteins	GO:0005737,cytoplasm; GO:2000012,regulation of auxin polar transport; GO:0040008,regulation of growth	Serine aminopeptidase, S33
BnaA02g35010D	8.96	9.23	7.19	25.2	17.89	28.32	-1.385	2.18586e-12	down	K00029 malate dehydrogenase (oxaloacetate-decarboxylating)(NADP+) [EC:1.1.1.40] | (RefSeq) NADP-dependent malic enzyme 2 (A)	PREDICTED: NADP-dependent malic enzyme 2-like [Brassica rapa]	RecName: Full=NADP-dependent malic enzyme 2; Short=AtNADP-ME2; Short=NADP-malic enzyme 2; EC=1.1.1.40;	RecName: Full=Malic enzyme {ECO:0000256|RuleBase:RU003426};	NADP+-dependent malic enzyme	GO:0048046,apoplast; GO:0005618,cell wall; GO:0009507,chloroplast; GO:0005829,cytosol; GO:0016020,membrane; GO:0005886,plasma membrane; GO:0009506,plasmodesma; GO:0005774,vacuolar membrane; GO:0004471,malate dehydrogenase (decarboxylating) (NAD+) activity; GO:0004473,malate dehydrogenase (decarboxylating) (NADP+) activity; GO:0046872,metal ion binding; GO:0051287,NAD binding; GO:0008948,oxaloacet…	Malic enzyme, N-terminal domain
BnaA02g35030D	2.08	2.44	2.97	5.73	3.99	7.05	-1.061	0.00905787	down	--	uncharacterized protein BNAA02G35030D isoform X2 [Brassica napus]	--	SubName: Full=BnaA02g35030D protein {ECO:0000313|EMBL:CDY61448.1};	--	--	--
BnaA02g35200D	51.71	74.03	58.28	277.6	226.99	272.01	-1.976	3.13908e-38	down	K12135 zinc finger protein CONSTANS | (RefSeq) zinc finger protein CONSTANS isoform X2 (A)	zinc finger protein CONSTANS-LIKE 5 [Brassica napus]	RecName: Full=Zinc finger protein CONSTANS-LIKE 5;	SubName: Full=BnaA02g35200D protein {ECO:0000313|EMBL:CDY58843.1};	GATA-4/5/6 transcription factors	GO:0005634,nucleus; GO:0003700,DNA-binding transcription factor activity; GO:0008270,zinc ion binding; GO:0048571,long-day photoperiodism; GO:0048579,negative regulation of long-day photoperiodism, flowering; GO:0045892,negative regulation of transcription, DNA-templated; GO:0048576,positive regulation of short-day photoperiodism, flowering; GO:0009909,regulation of flower development; GO:0006355…	B-box zinc finger
BnaA02g35330D	6.26	7.6	15.23	3.25	2.52	4.14	1.651	1.86039e-05	up	K14504 xyloglucan:xyloglucosyl transferase TCH4 [EC:2.4.1.207] | (RefSeq) xyloglucan endotransglucosylase/hydrolase protein 22 (A)	BnaA02g35330D [Brassica napus]	RecName: Full=Xyloglucan endotransglucosylase/hydrolase protein 22; Short=At-XTH22; Short=XTH-22; EC=2.4.1.207; AltName: Full=Touch protein 4; Flags: Precursor;	RecName: Full=Xyloglucan endotransglucosylase/hydrolase {ECO:0000256|RuleBase:RU361120}; EC=2.4.1.207 {ECO:0000256|RuleBase:RU361120};	--	GO:0048046,apoplast; GO:0005618,cell wall; GO:0005794,Golgi apparatus; GO:0004553,hydrolase activity, hydrolyzing O-glycosyl compounds; GO:0016762,xyloglucan:xyloglucosyl transferase activity; GO:0042546,cell wall biogenesis; GO:0009664,plant-type cell wall organization; GO:0009733,response to auxin; GO:0009741,response to brassinosteroid; GO:0009409,response to cold; GO:0009408,response to heat;…	Xyloglucan endo-transglycosylase (XET) C-terminus
BnaA02g35440D	93.73	104.08	69.38	41.41	45.61	28.53	1.304	5.6644e-09	up	K04079 molecular chaperone HtpG | (RefSeq) heat shock protein 90-2-like (A)	BnaA02g35440D [Brassica napus]	RecName: Full=Heat shock protein 90-4 {ECO:0000305}; Short=AtHSP90.4 {ECO:0000305}; Short=AtHsp90-4 {ECO:0000303|PubMed:11599565}; AltName: Full=Heat shock protein 81-4 {ECO:0000305}; Short=Hsp81-4 {ECO:0000303|PubMed:11599565};	SubName: Full=BnaA02g35440D protein {ECO:0000313|EMBL:CDY64982.1};	Molecular chaperone (HSP90 family)	GO:0048046,apoplast; GO:0005618,cell wall; GO:0009570,chloroplast stroma; GO:0005829,cytosol; GO:0005794,Golgi apparatus; GO:0005634,nucleus; GO:0005886,plasma membrane; GO:0005774,vacuolar membrane; GO:0005524,ATP binding; GO:0051082,unfolded protein binding; GO:0006457,protein folding; GO:0006950,response to stress	Histidine kinase-, DNA gyrase B-, and HSP90-like ATPase
BnaA02g35480D	0.41	0.2	0.2	2.41	2.08	1.52	-2.777	0.000875545	down	--	PREDICTED: major oleosin NAP-II [Brassica rapa]	--	SubName: Full=Uncharacterized protein {ECO:0000313|EnsemblPlants:Bra035603.1-P};	--	--	Oleosin
BnaA02g35670D	56.07	42.67	37.88	19.01	25.98	24.1	1.082	5.81314e-07	up	K06891 ATP-dependent Clp protease adaptor protein ClpS | (RefSeq) ATP-dependent Clp protease adapter protein CLPS1, chloroplastic (A)	PREDICTED: ATP-dependent Clp protease adapter protein CLPS1, chloroplastic-like [Brassica rapa]	RecName: Full=ATP-dependent Clp protease adapter protein CLPS1, chloroplastic {ECO:0000303|Ref.6}; Flags: Precursor;	SubName: Full=Uncharacterized protein {ECO:0000313|EnsemblPlants:Bra038361.1-P};	--	GO:0009570,chloroplast stroma; GO:0005840,ribosome; GO:0008233,peptidase activity; GO:0030163,protein catabolic process	ATP-dependent Clp protease adaptor protein ClpS
BnaA02g35730D	21.92	26.31	19.95	8.93	9	7.24	1.537	1.85164e-17	up	K14638 solute carrier family 15 (peptide/histidine transporter), member 3/4 | (RefSeq) protein NRT1/ PTR FAMILY 2.13-like (A)	BnaA02g35730D [Brassica napus]	RecName: Full=Protein NRT1/ PTR FAMILY 2.13; Short=AtNPF2.13; AltName: Full=Nitrate transporter 1.7;	SubName: Full=BnaA02g35730D protein {ECO:0000313|EMBL:CDY56086.1};	H+/oligopeptide symporter	GO:0016021,integral component of membrane; GO:0005886,plasma membrane; GO:0080054,low-affinity nitrate transmembrane transporter activity; GO:0015293,symporter activity; GO:0042128,nitrate assimilation; GO:0015706,nitrate transport	POT family
BnaA02g35780D	5.46	6.38	6.33	10.64	17.66	12.51	-1.076	1.4579e-05	down	K00688 glycogen phosphorylase [EC:2.4.1.1] | (RefSeq) glycogen phosphorylase 1-like isoform X1 (A)	PREDICTED: ACT domain-containing protein ACR4 [Brassica rapa]	RecName: Full=ACT domain-containing protein ACR4 {ECO:0000305}; AltName: Full=Protein ACT DOMAIN REPEATS 4 {ECO:0000303|PubMed:12481063};	SubName: Full=Uncharacterized protein {ECO:0000313|EnsemblPlants:Bra038330.1-P};	--	GO:0009506,plasmodesma	ACT domain
BnaA02g35820D	5.47	6.36	6.25	13.75	15.09	17.75	-1.267	1.88022e-15	down	K14766 nucleolar protein 14 | (RefSeq) nucleolar protein 14 (A)	PREDICTED: nucleolar protein 14 [Brassica rapa]	--	SubName: Full=Uncharacterized protein {ECO:0000313|EnsemblPlants:Bra038327.1-P};	Nucleolar protein involved in 40S ribosome biogenesis	--	Noc2p family
BnaA02g35880D	4.37	4.7	4.02	11.14	13.12	11.78	-1.364	1.42065e-13	down	K08145 MFS transporter, SP family, solute carrier family 2 (facilitated glucose transporter), member 8 | (RefSeq) sugar transporter ERD6-like 6 (A)	PREDICTED: sugar transporter ERD6-like 6 [Brassica oleracea var. oleracea]	RecName: Full=Sugar transporter ERD6-like 6;	SubName: Full=Uncharacterized protein {ECO:0000313|EnsemblPlants:Bo2g082550.1};	Predicted transporter (major facilitator superfamily)	GO:0005794,Golgi apparatus; GO:0016021,integral component of membrane; GO:0009705,plant-type vacuole membrane; GO:0005774,vacuolar membrane; GO:0005355,glucose transmembrane transporter activity; GO:0005351,carbohydrate:proton symporter activity; GO:0042593,glucose homeostasis; GO:0046323,glucose import; GO:0035428,NA; GO:0010030,positive regulation of seed germination	Major Facilitator Superfamily
BnaA02g35950D	6.75	7.09	8.23	15.8	16.96	14.95	-1.013	8.20979e-08	down	K15601 lysine-specific demethylase 3 [EC:1.14.11.-] | (RefSeq) lysine-specific demethylase JMJ25-like (A)	BnaA02g35950D [Brassica napus]	RecName: Full=Zinc-finger homeodomain protein 5; Short=AtZHD5; AltName: Full=Homeobox protein 33; Short=AtHB-33;	SubName: Full=BnaA02g35950D protein {ECO:0000313|EMBL:CDY62531.1};	--	GO:0005634,nucleus; GO:0003700,DNA-binding transcription factor activity; GO:0046872,metal ion binding; GO:0042803,protein homodimerization activity; GO:0043565,sequence-specific DNA binding; GO:0009738,abscisic acid-activated signaling pathway; GO:0045893,positive regulation of transcription, DNA-templated; GO:0009737,response to abscisic acid; GO:0006351,transcription, DNA-templated	ZF-HD protein dimerisation region
BnaA02g36210D	16.34	11.61	10.54	3.71	3.12	3.33	2.028	2.59629e-20	up	K20102 YTH domain-containing family protein | (RefSeq) uncharacterized LOC103853183 (A)	BnaA02g36210D [Brassica napus]	RecName: Full=30-kDa cleavage and polyadenylation specificity factor 30 {ECO:0000303|PubMed:18479511}; EC=3.1.21.- {ECO:0000269|PubMed:17576667}; AltName: Full=Protein OXIDATIVE STRESS TOLERANT 6 {ECO:0000303|PubMed:18545667}; AltName: Full=Zinc finger CCCH domain-containing protein 11; Short=AtC3H11;	SubName: Full=BnaA02g36210D protein {ECO:0000313|EMBL:CDY56809.1};	Uncharacterized high-glucose-regulated protein	GO:0005737,cytoplasm; GO:0005847,mRNA cleavage and polyadenylation specificity factor complex; GO:0005634,nucleus; GO:0005516,calmodulin binding; GO:0003677,DNA binding; GO:0004519,endonuclease activity; GO:0004521,endoribonuclease activity; GO:0046872,metal ion binding; GO:0003729,mRNA binding; GO:0003723,RNA binding; GO:0031124,mRNA 3'-end processing; GO:0006378,mRNA polyadenylation; GO:0009626…	Restriction endonuclease AspBHI N-terminal
BnaA02g36270D	9.72	11.91	13.02	27.81	30.48	35.53	-1.339	6.59547e-13	down	K02937 large subunit ribosomal protein L7e | (RefSeq) 60S ribosomal protein L7-1 (A)	60S ribosomal protein L7-1 [Brassica napus]	RecName: Full=60S ribosomal protein L7-1;	SubName: Full=BnaA02g36270D protein {ECO:0000313|EMBL:CDY66947.1};	60S ribosomal protein L7	GO:0005829,cytosol; GO:0022625,cytosolic large ribosomal subunit; GO:0005730,nucleolus; GO:0003723,RNA binding; GO:0003735,structural constituent of ribosome; GO:0002181,cytoplasmic translation; GO:0000463,maturation of LSU-rRNA from tricistronic rRNA transcript (SSU-rRNA, 5.8S rRNA, LSU-rRNA)	Ribosomal L30 N-terminal domain
BnaA02g36290D	2.85	3.74	5.82	2	1.59	1.81	1.302	0.000503941	up	K09874 aquaporin NIP | (RefSeq) aquaporin NIP6-1 (A)	BnaA02g36290D [Brassica napus]	RecName: Full=Aquaporin NIP6-1; AltName: Full=NOD26-like intrinsic protein 6-1; Short=AtNIP6;1;	SubName: Full=BnaA02g36290D protein {ECO:0000313|EMBL:CDY66949.1};	Aquaporin (major intrinsic protein family)	GO:0005887,integral component of plasma membrane; GO:0005886,plasma membrane; GO:0046715,active borate transmembrane transporter activity; GO:0015267,channel activity; GO:0015168,glycerol transmembrane transporter activity; GO:0015204,urea transmembrane transporter activity; GO:0046713,borate transport; GO:0080029,cellular response to boron-containing substance levels	Major intrinsic protein
[truncated: 6,780 more rows]

## Sheet: Table S4
Table S4: Candidate genes and their specific primers used in the RT-qPCR analysis.
GeneID	Gene Name	Sequence length (bp)	log2 Ratio(HL/NL)	Up/Down-regulation		Primer Sequences (5'-3')	Amplicon length (bp)	Group
BnaA09g18200D	BnbHLH28	1524	4.282	Up	F	GAATCCCAGCCCAGACAGT	438	Selected genes for validation of transcriptome data
					R	CGTAGCAAACGCCTTACCC
BnaC06g20460D	BnELIP1	588	9.368	Up	F	GTGGGAGTGAGATGTATGGC	184
[truncated: 57 more rows]

## Sheet: Table S5
Table S5: Gene ontology (GO) enrichment analysis of differentially expressed genes.
[truncated: 4,254 more rows]

[truncated: 5 more sheets: Table S6, Table S7, Table S8, Table S9, Table S10]
